# Supplementary material for: Knockout of B2M in combination with PD-L1 overexpression protects MSC-derived new islet β cells from graft rejection in the treatment of canine diabetes mellitus
Source: PubMed Central journal article supplement — Stem Cell Res Ther. 2024 Dec 2;15:458. doi: 10.1186/s13287-024-04067-7 (PMC11613808; doi:10.1186/s13287-024-04067-7), 2024-12-02

**COL1A2**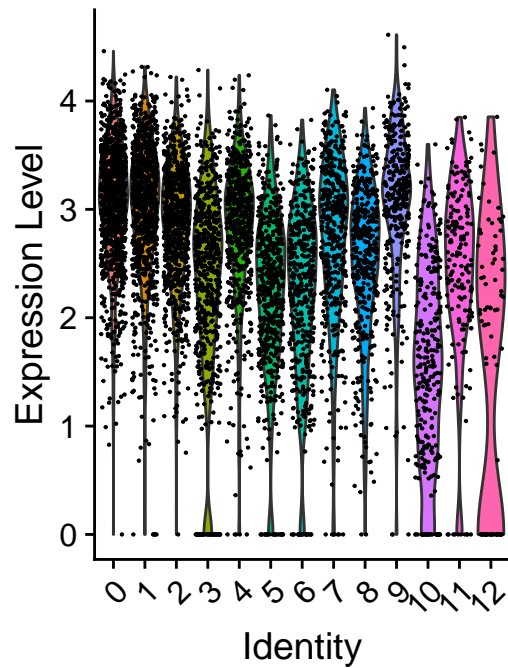**GNG11**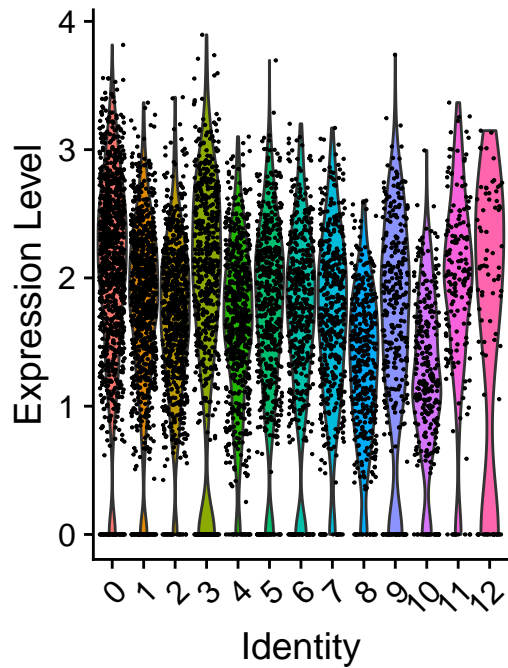**ENSCAFG00000031808**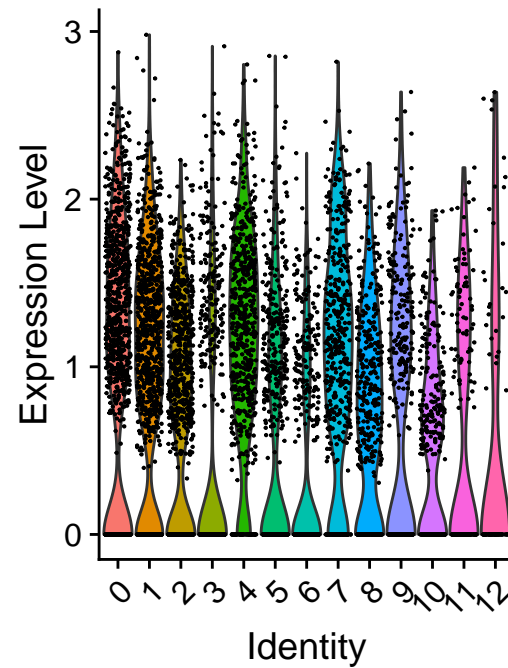**COL3A1**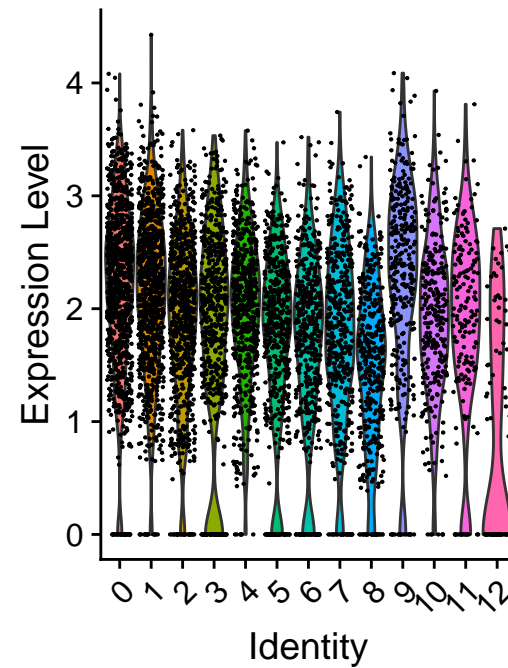**IL33**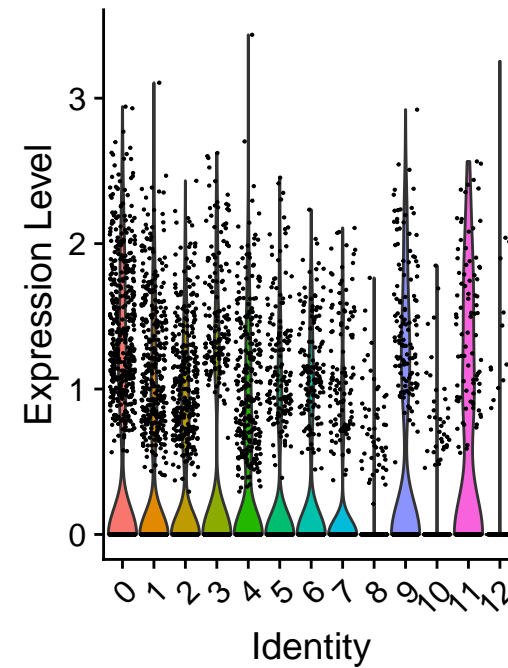**H1-0**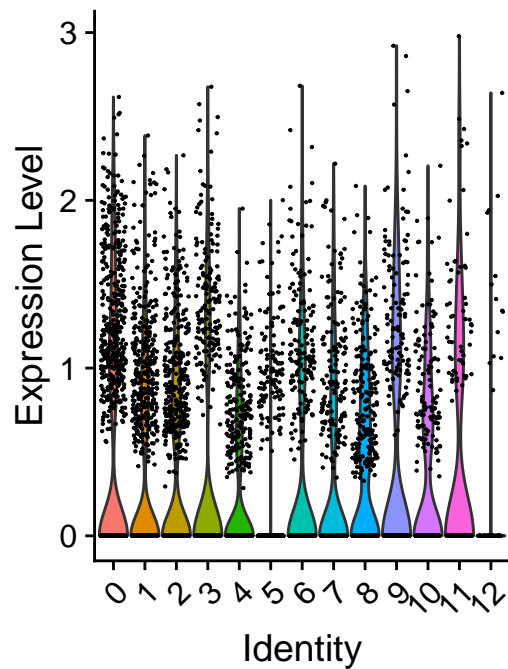**FAP**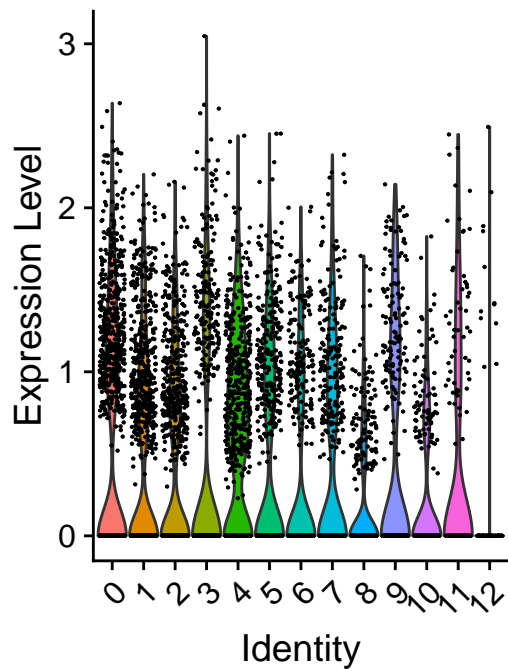**MSH6**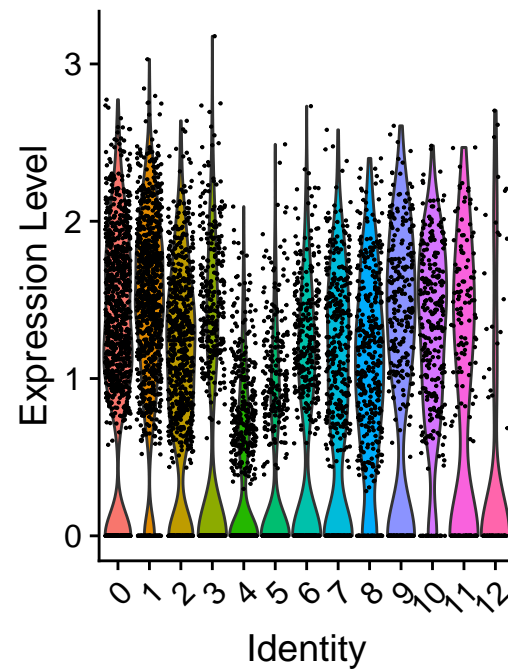**ABCA1**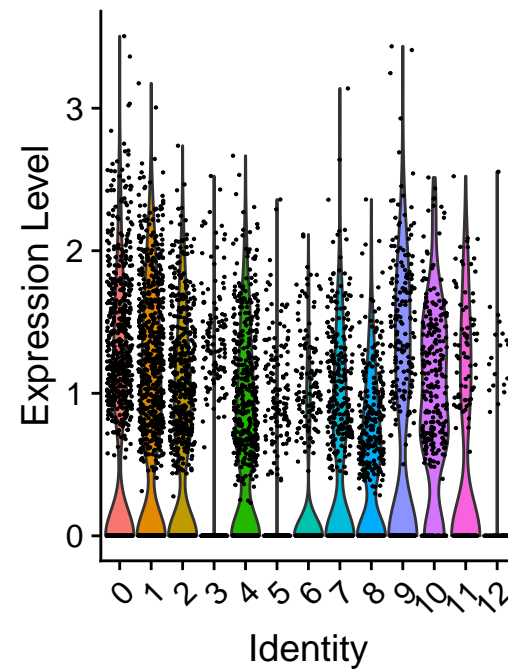**RASL11A**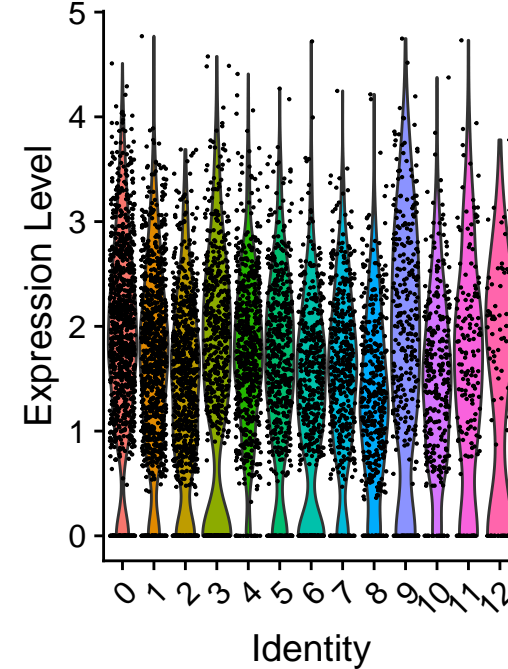





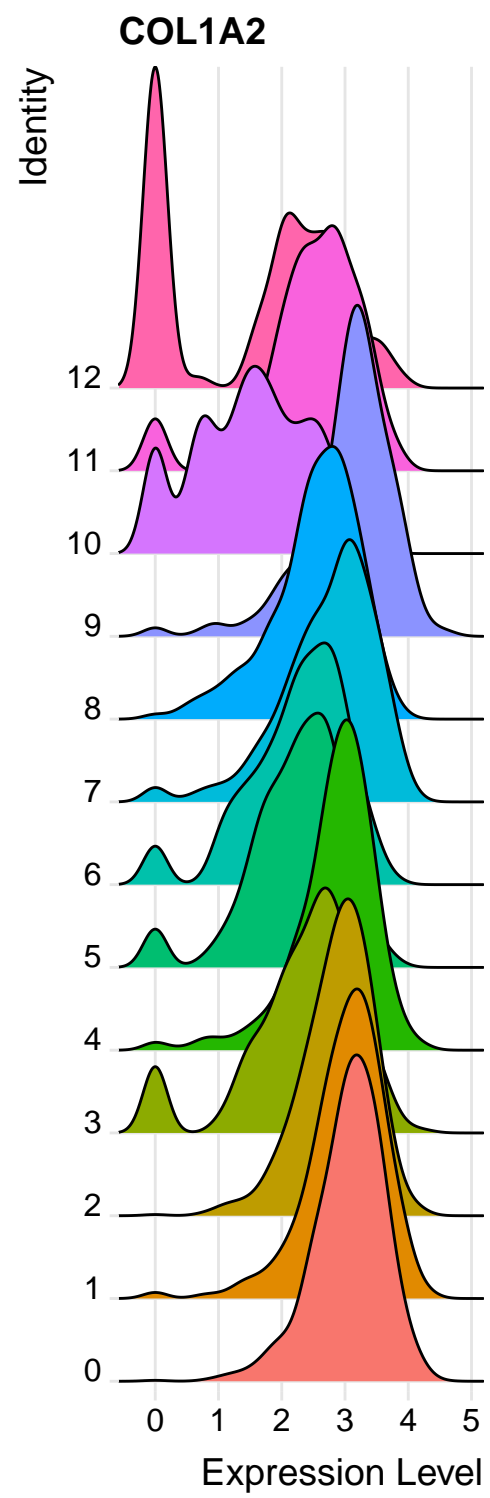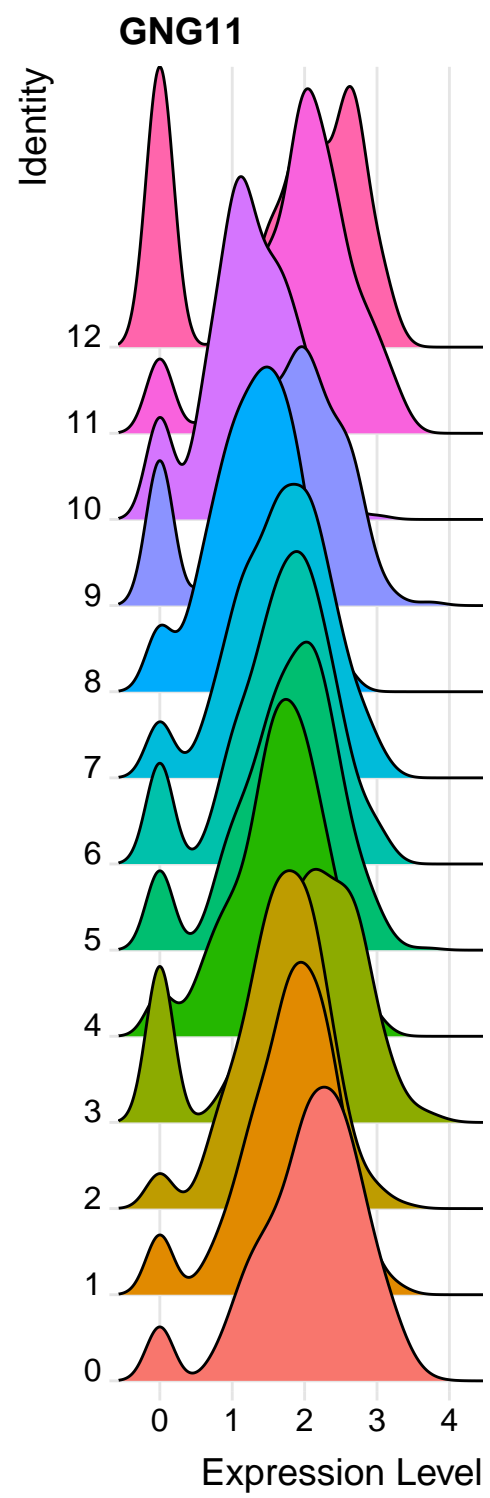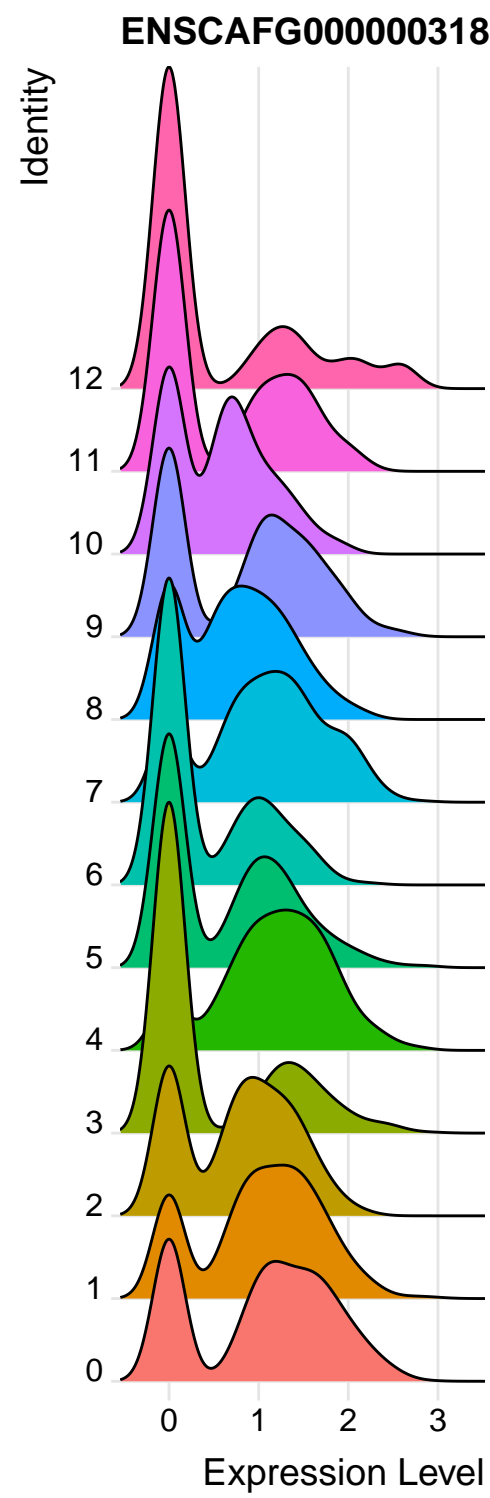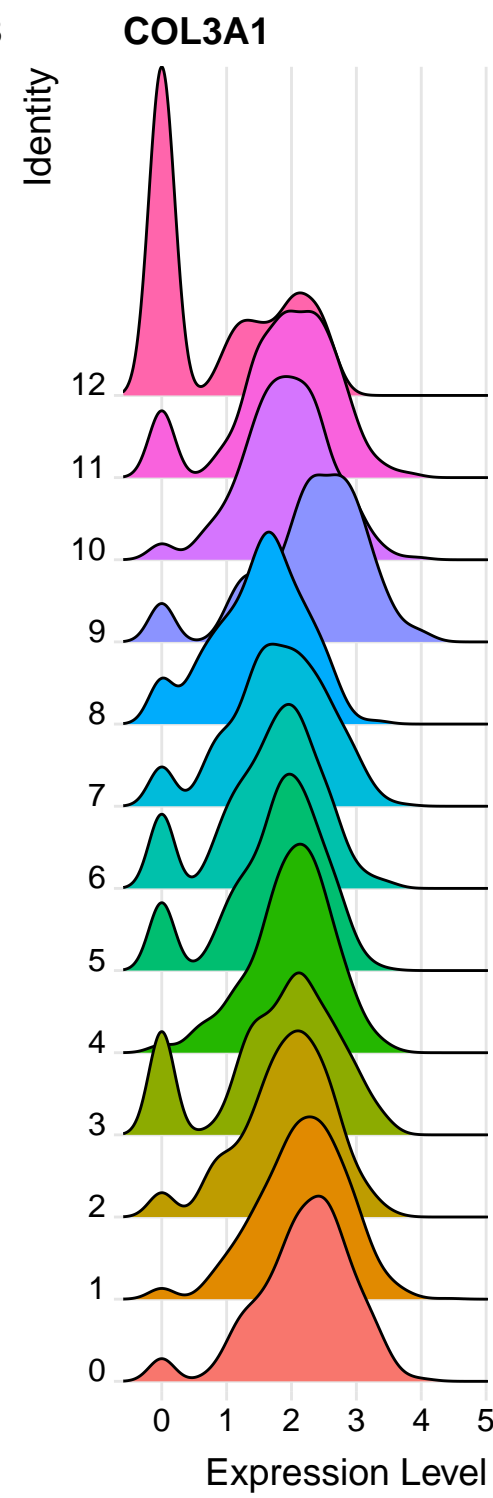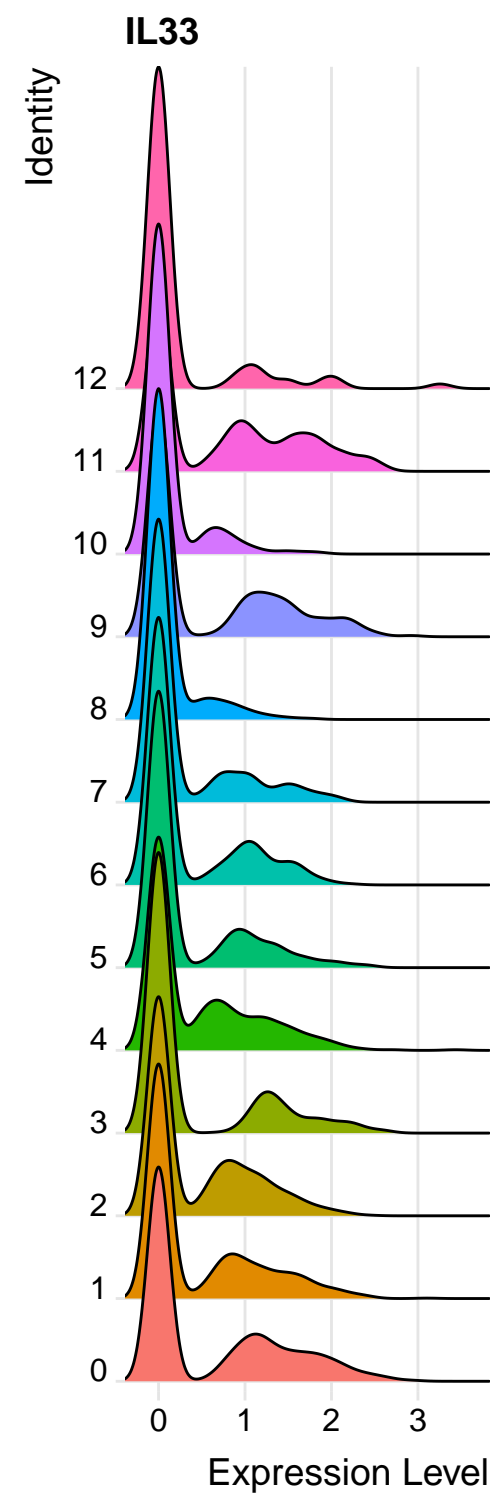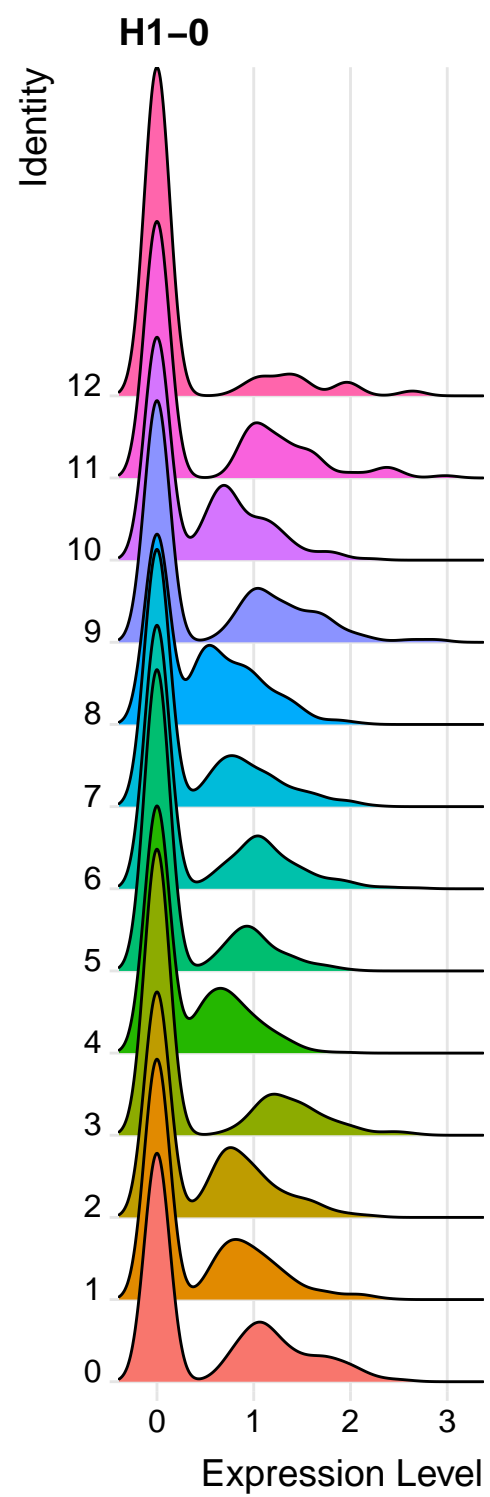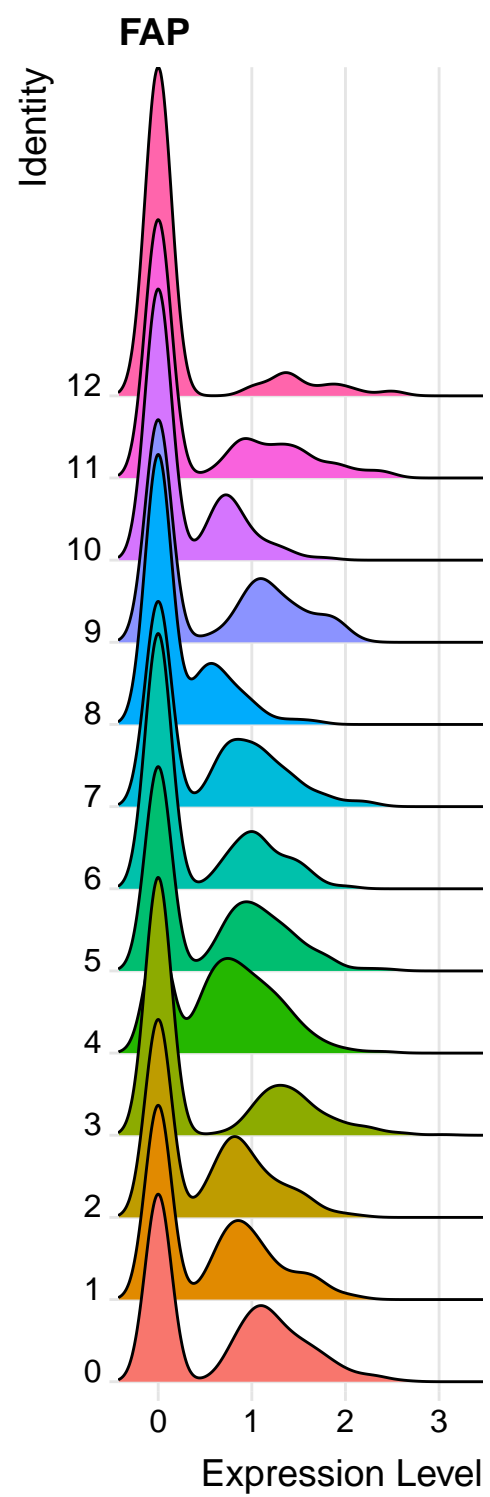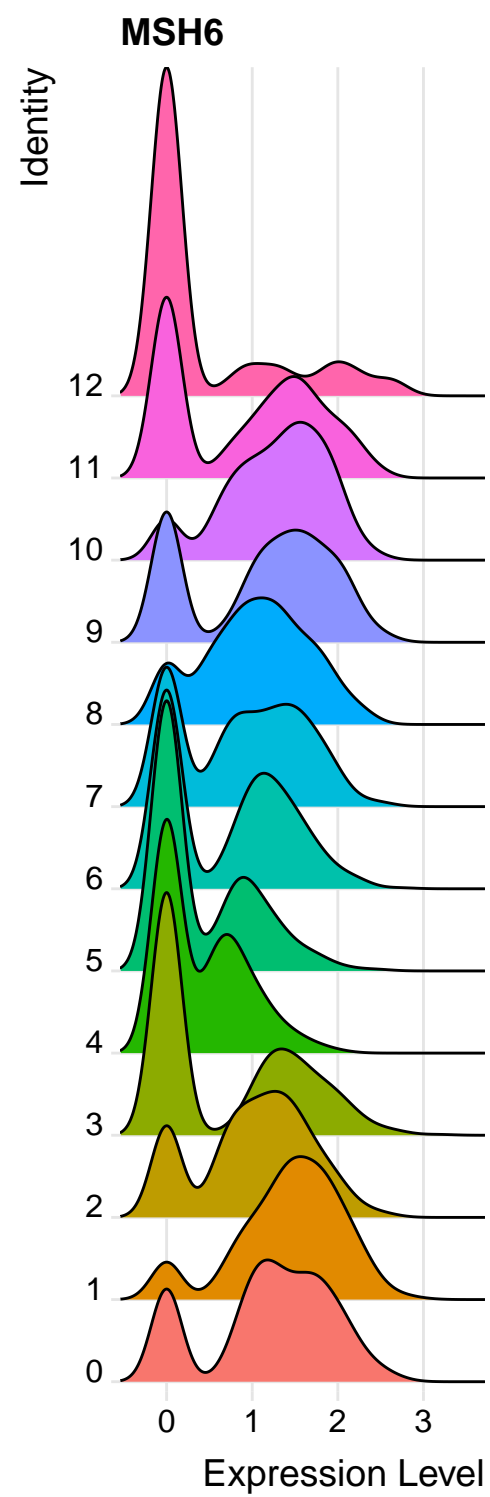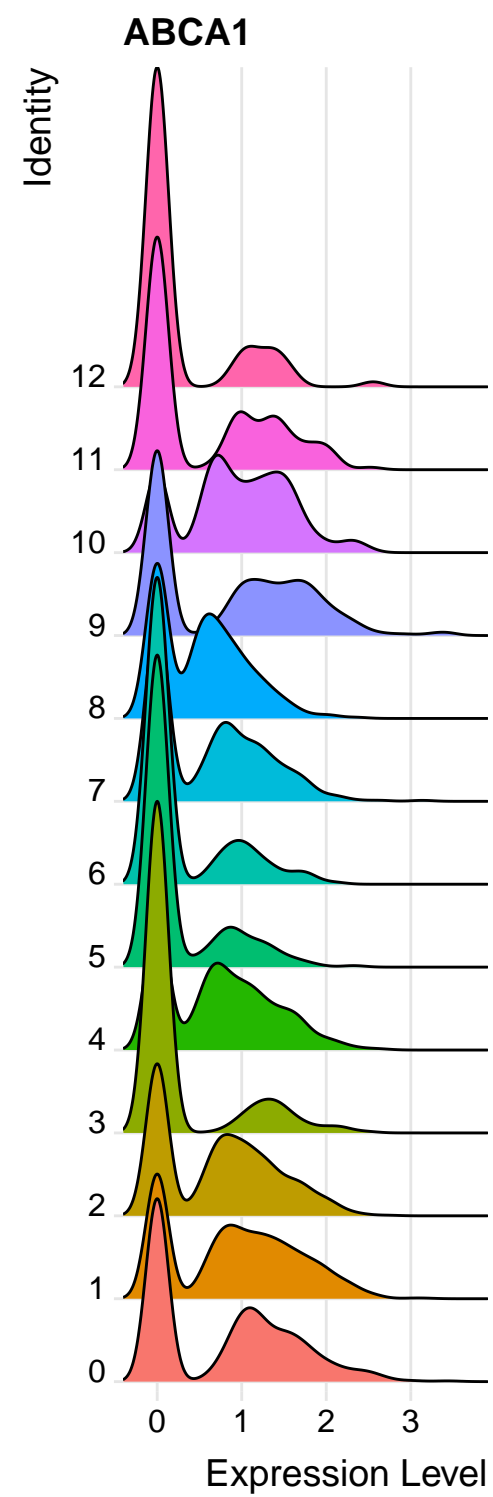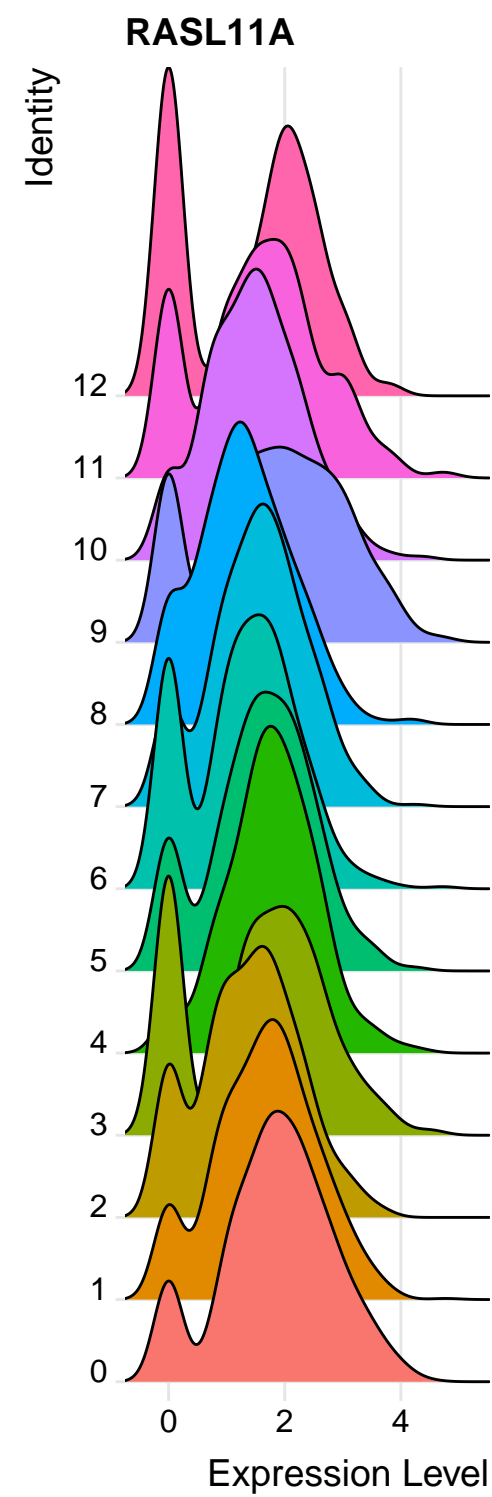

**COL1A2**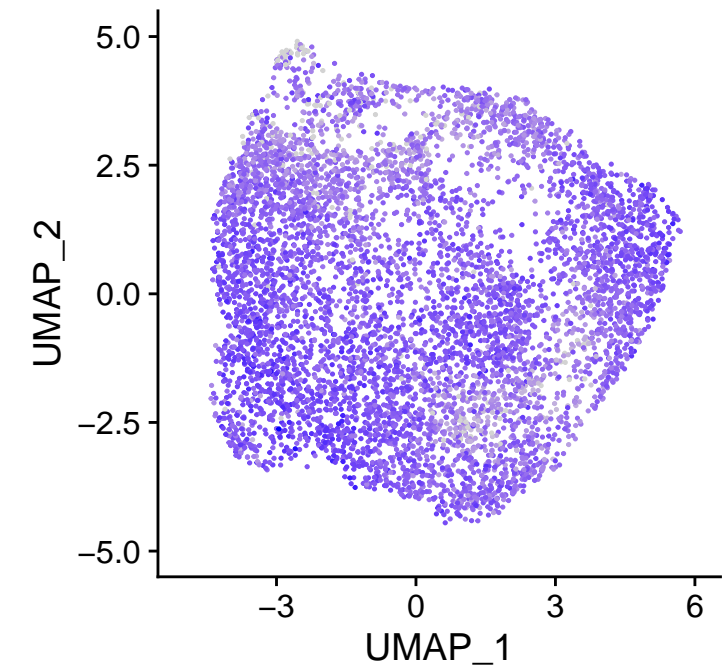**GNG11**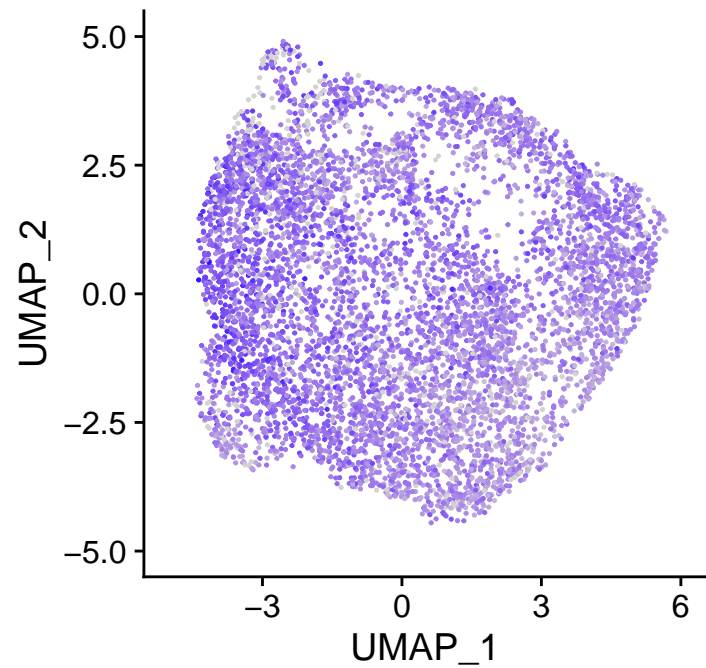**ENSCAFG00000031808**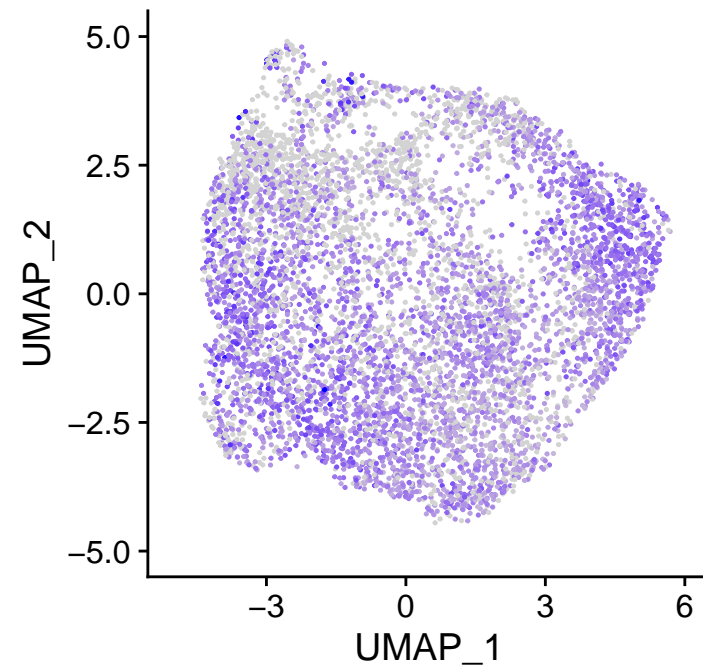**COL3A1**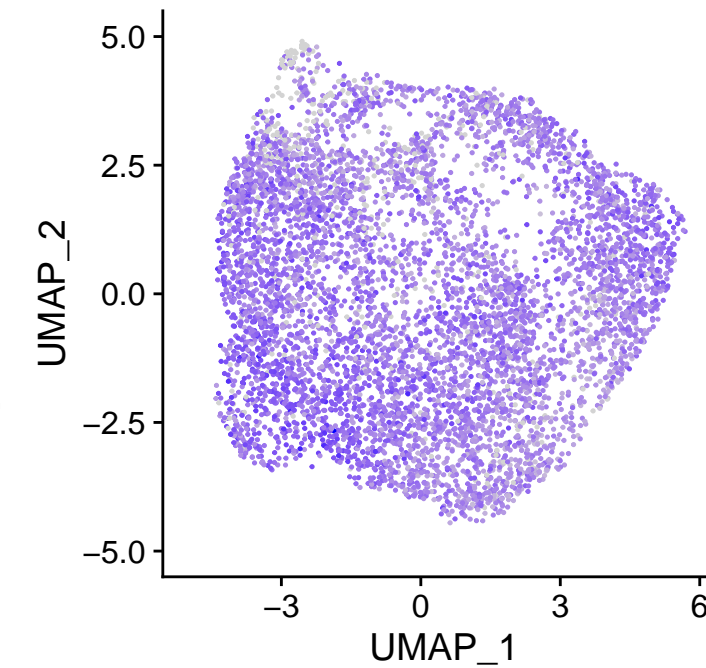**IL33**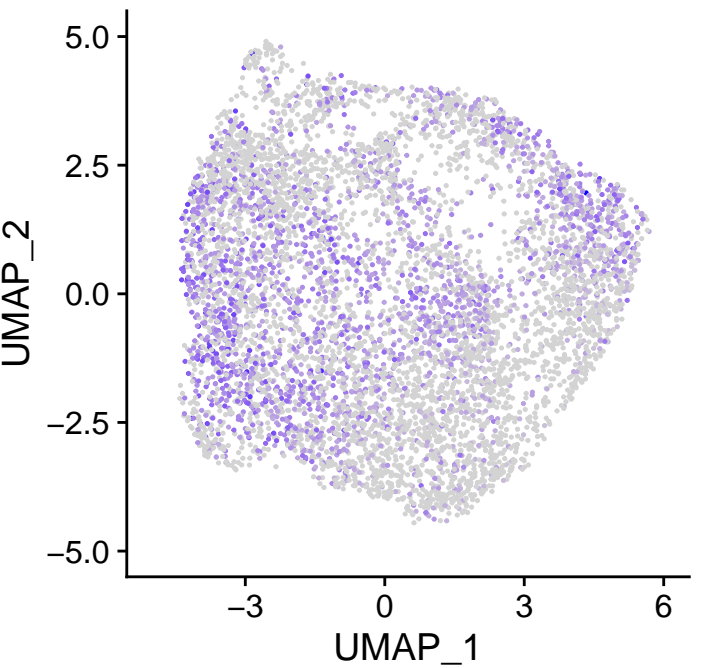**H1-0**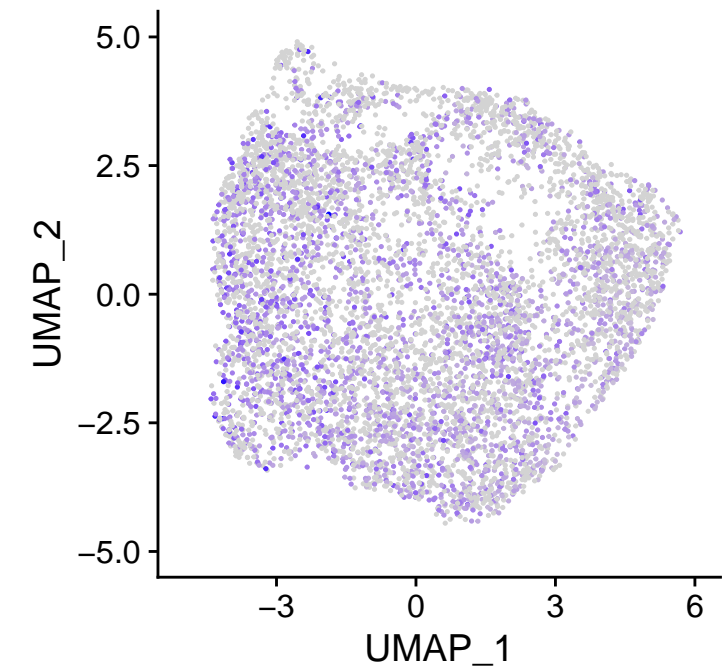**FAP**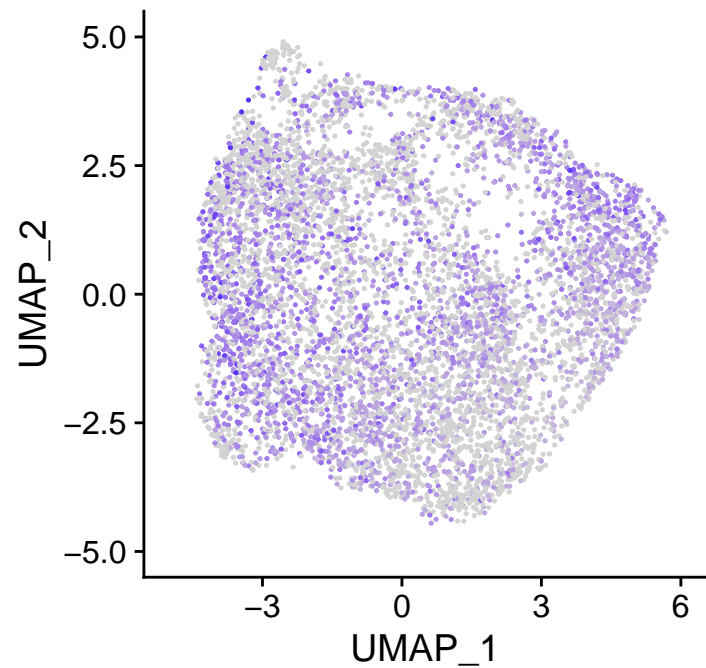**MSH6**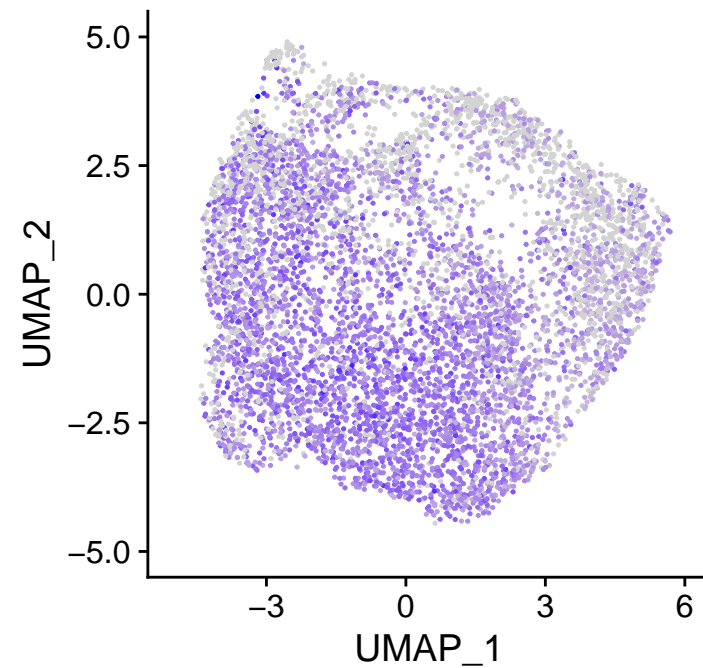**ABCA1**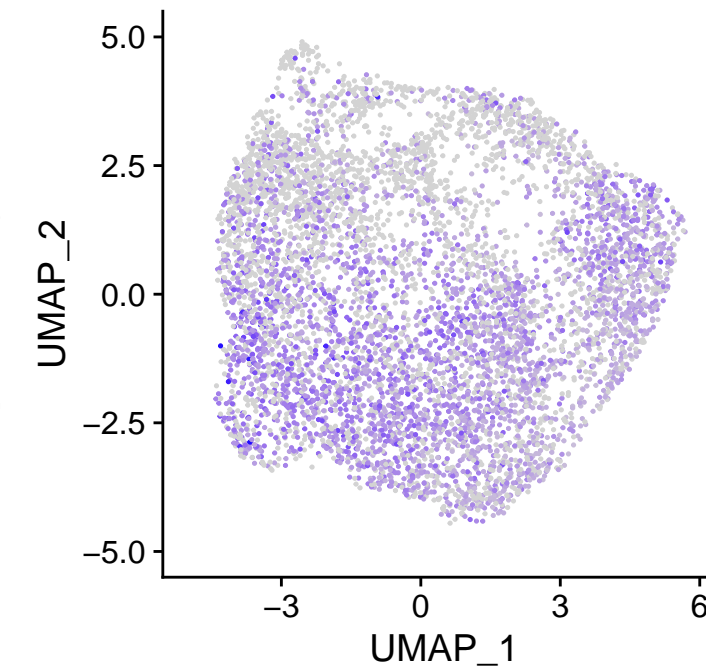**RASL11A**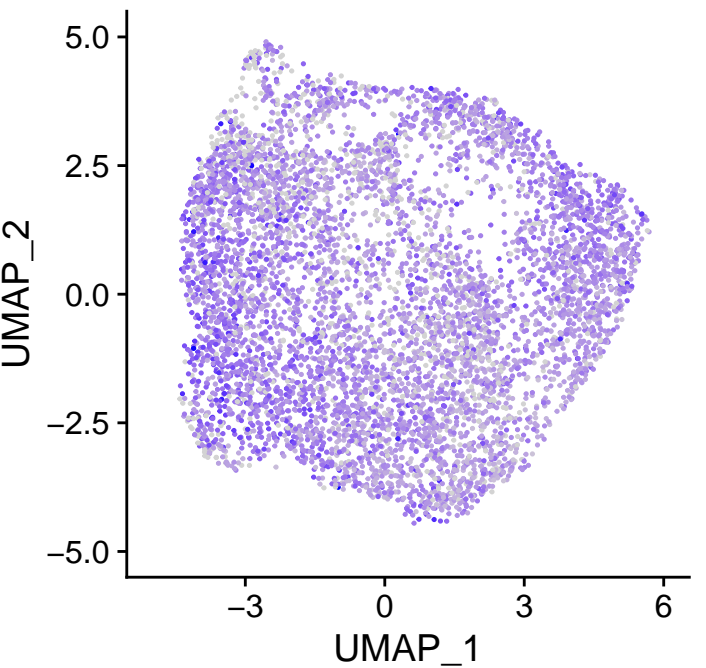



**MCM6**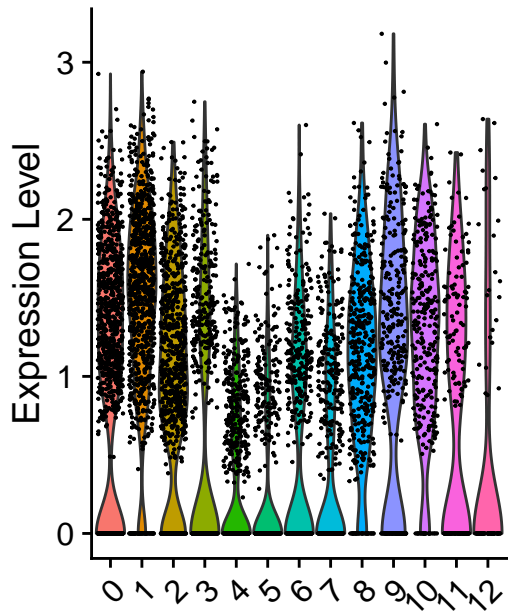

Identity

**MSH6**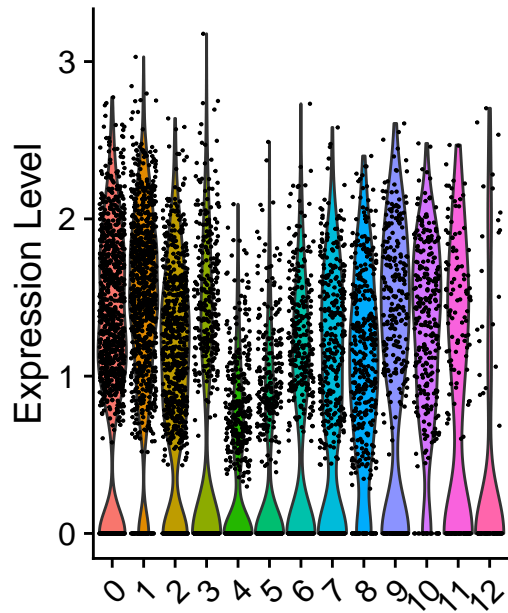

Identity

**UHRF1**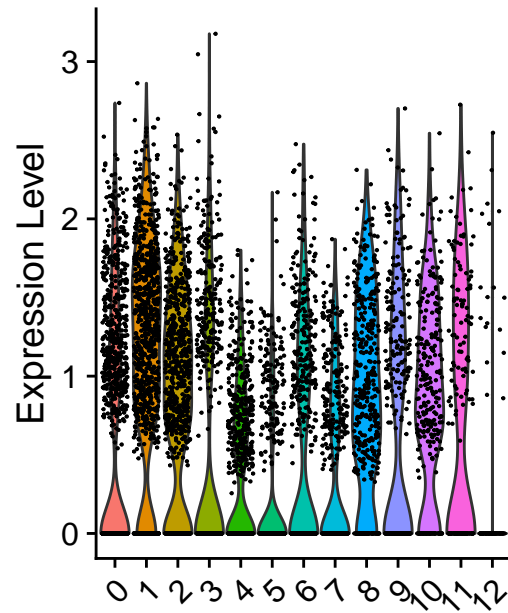

Identity

**HELLS**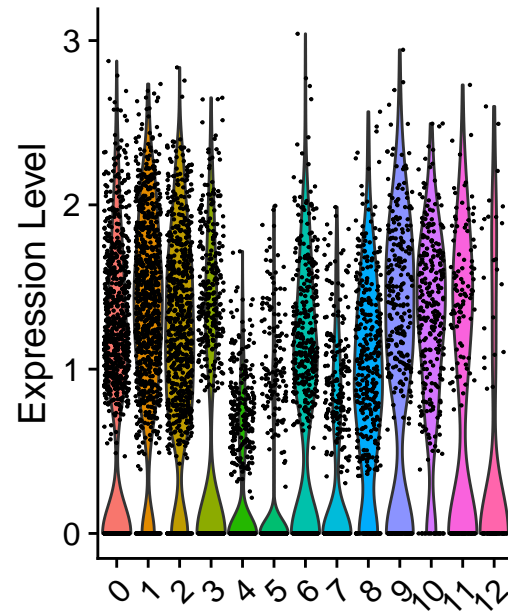

Identity

**MCM3**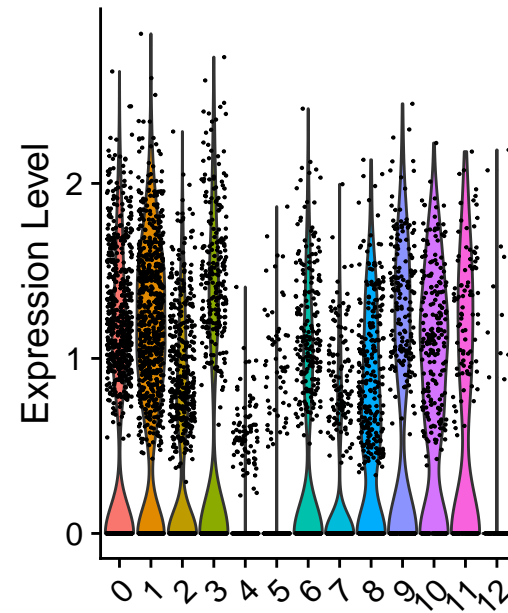

Identity

**PCNA**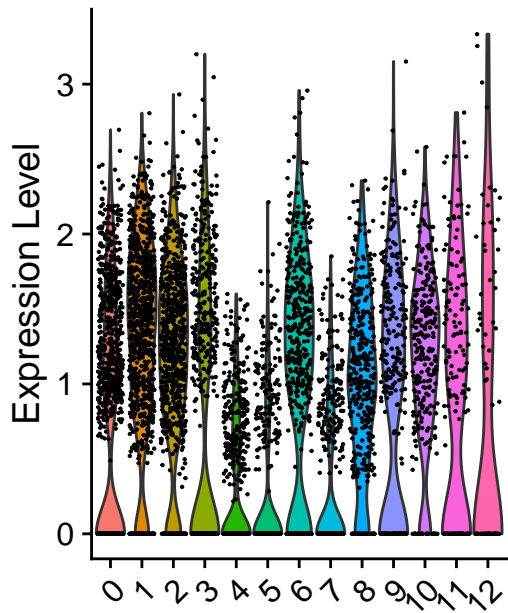

Identity

**TOPBP1**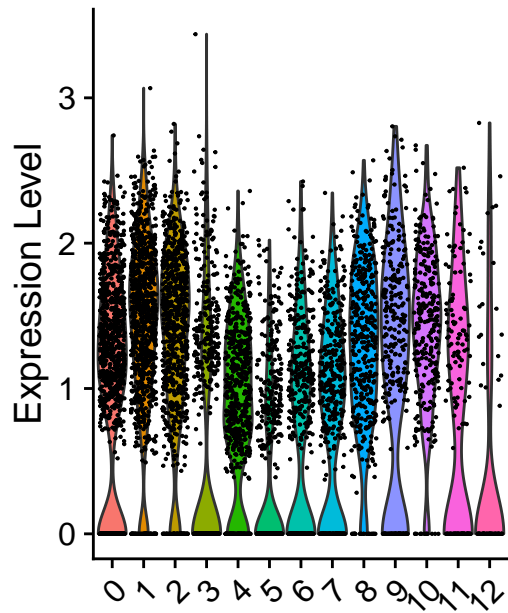

Identity

**ENSCAFG00000030087**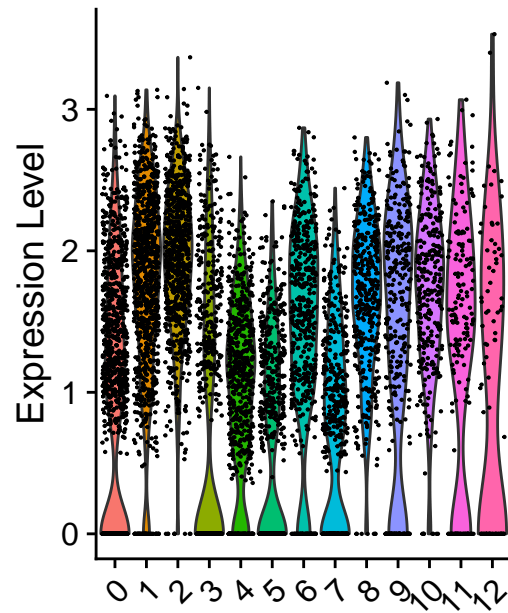

Identity

**MSH2**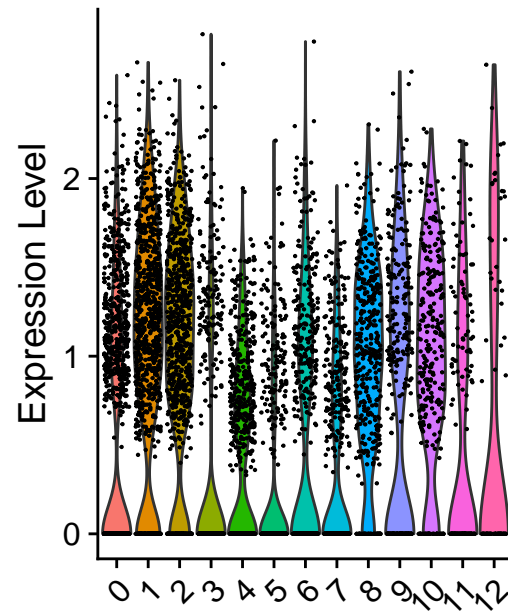

Identity

**RRM2**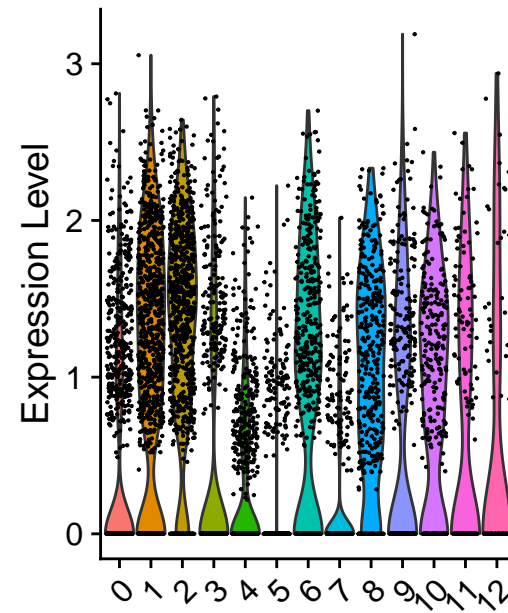

Identity





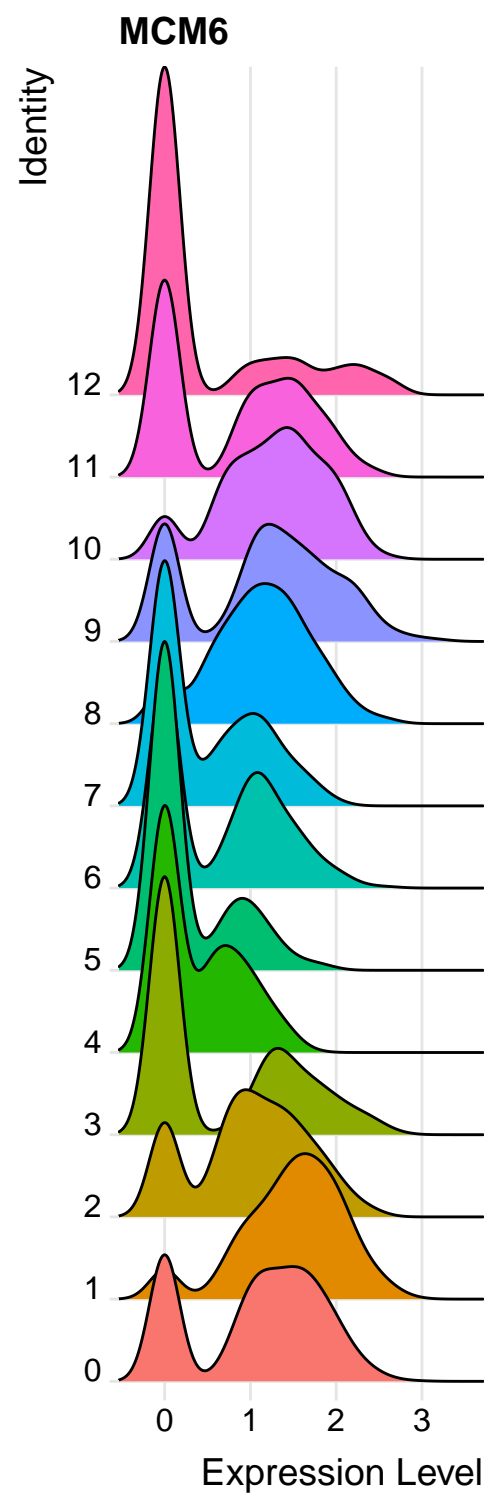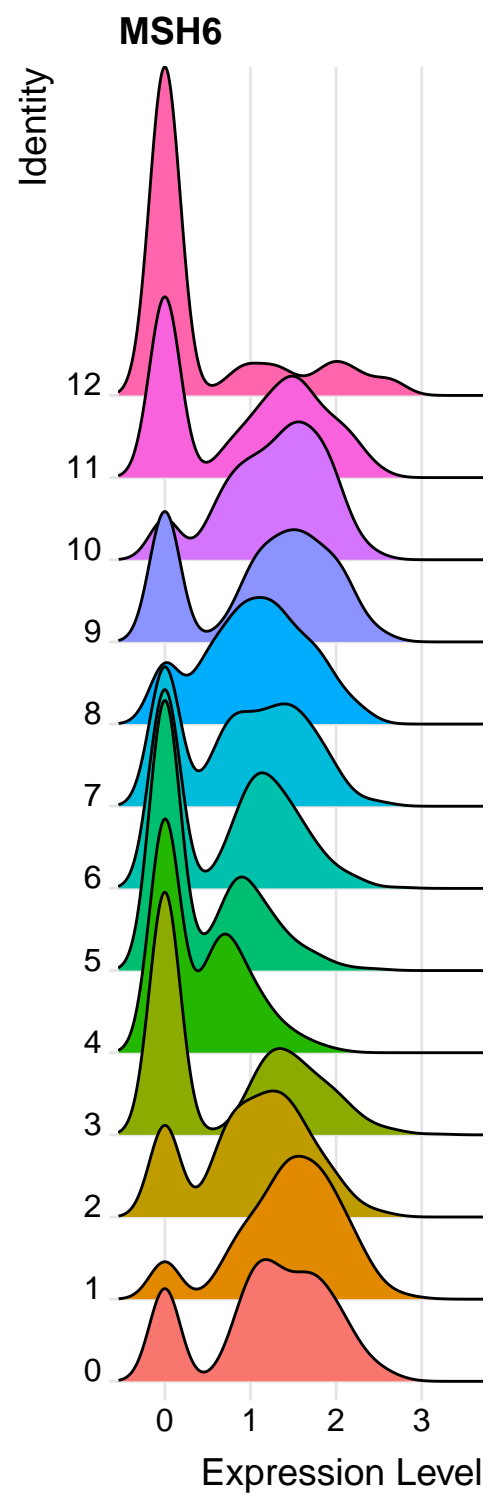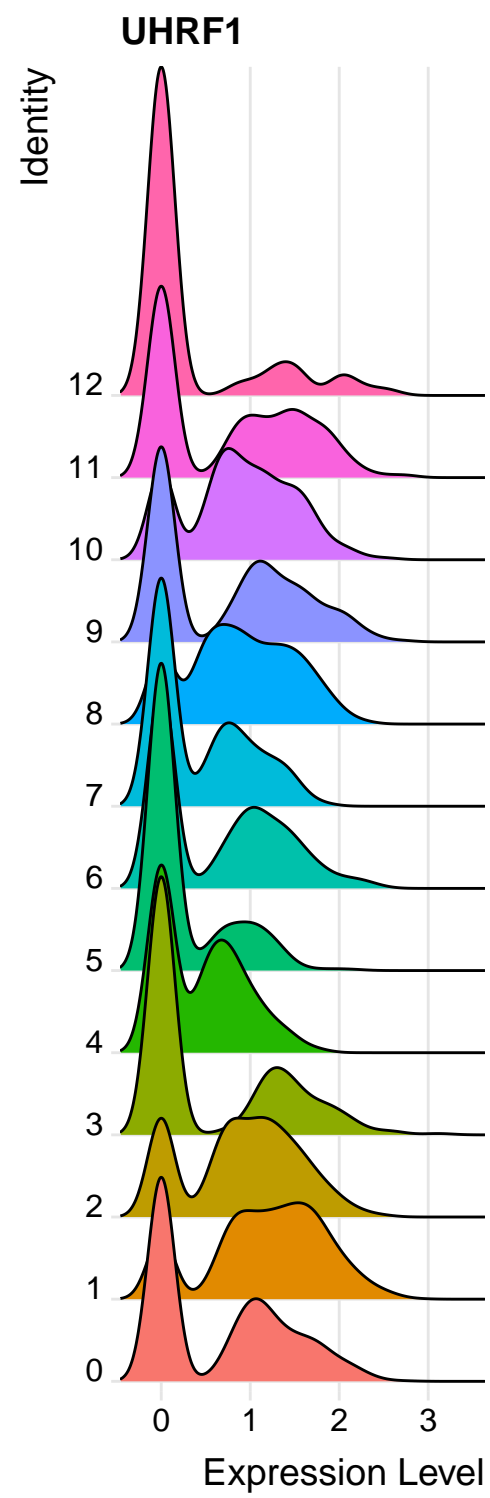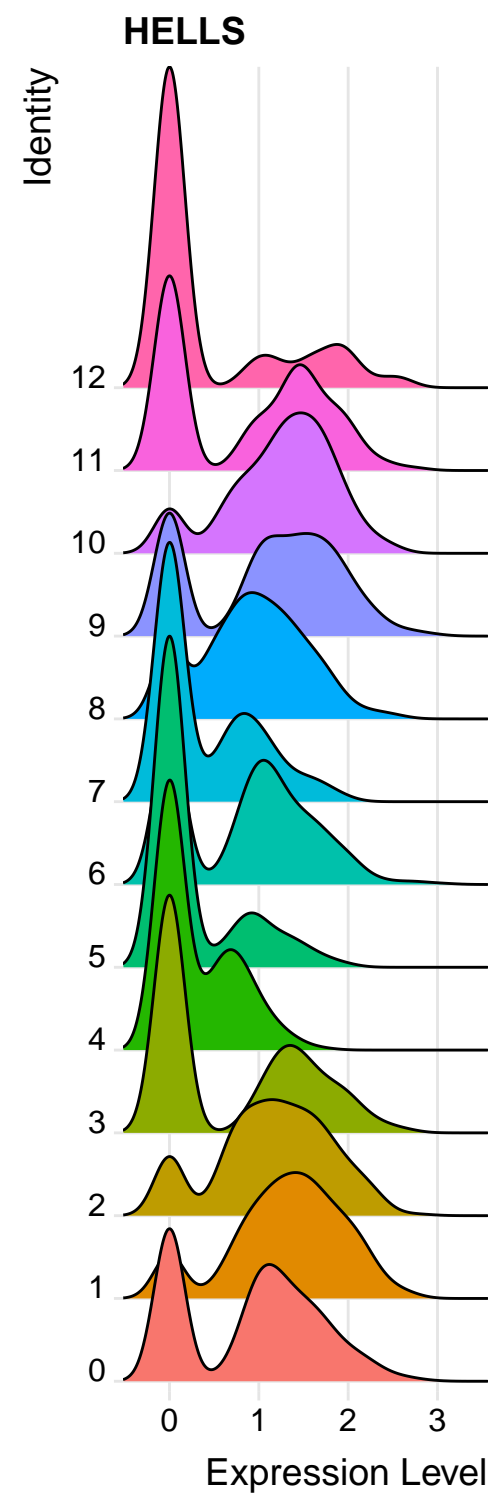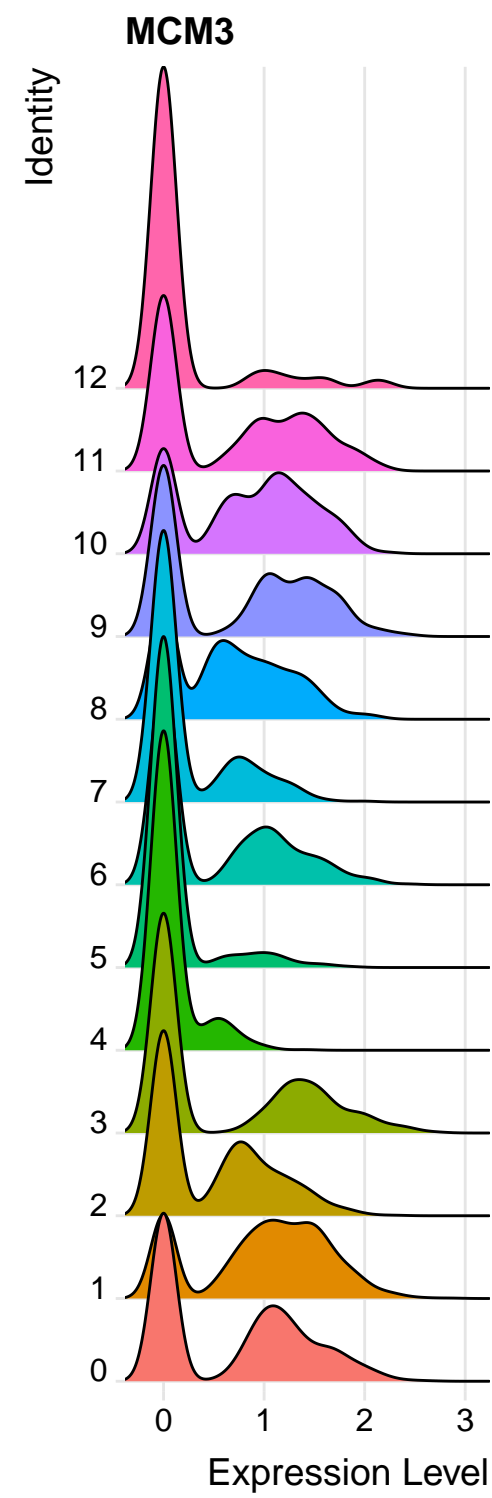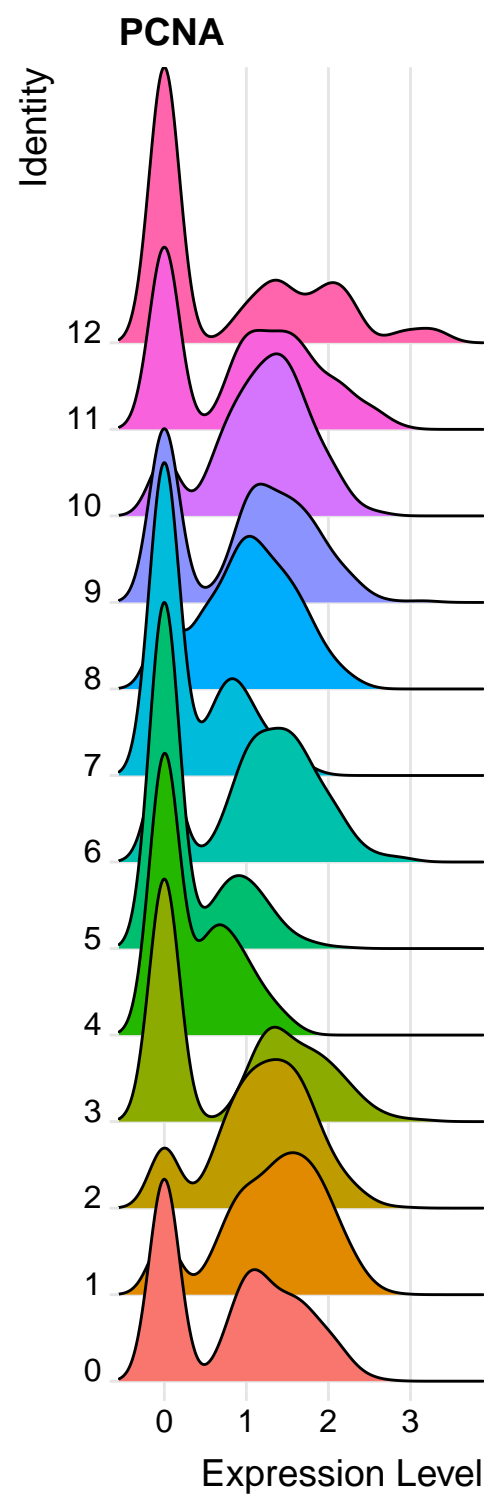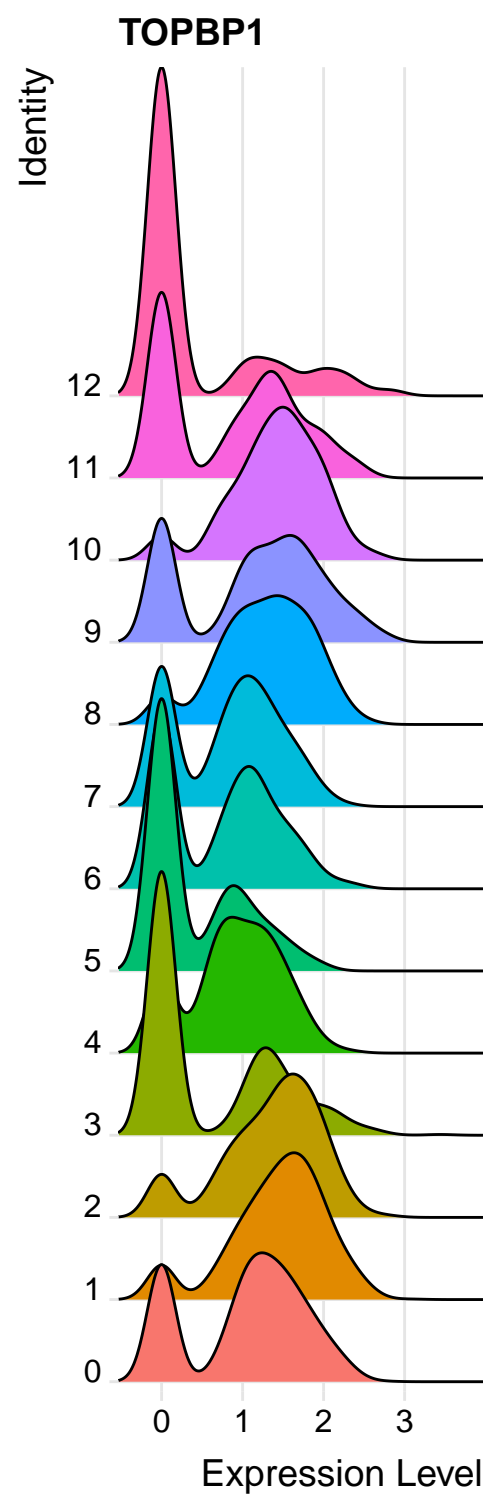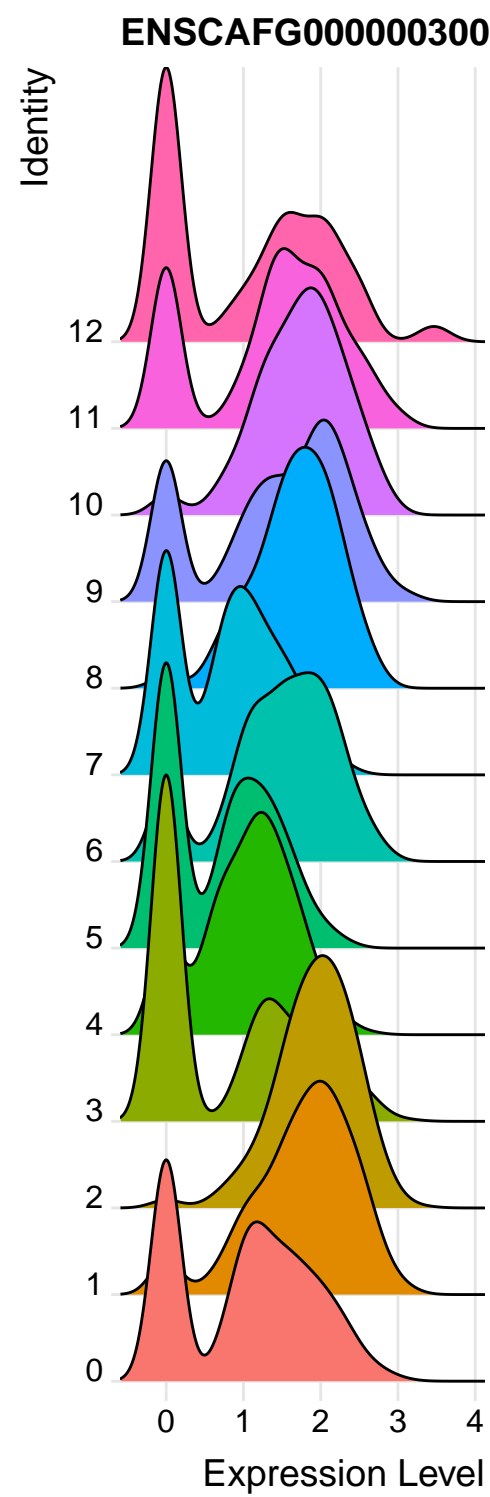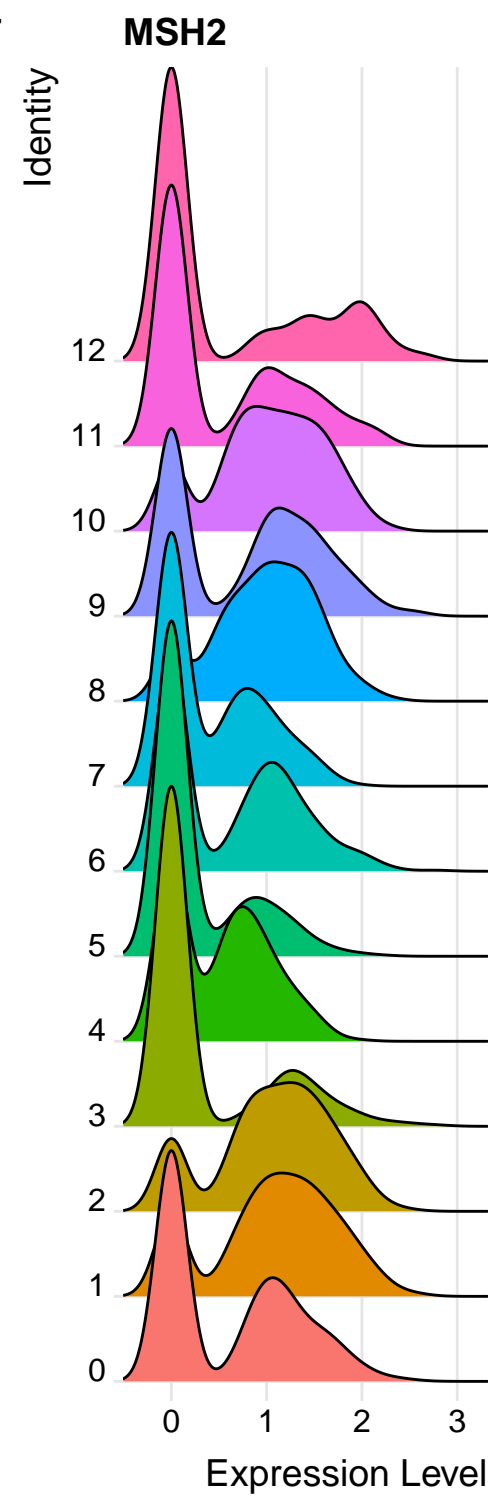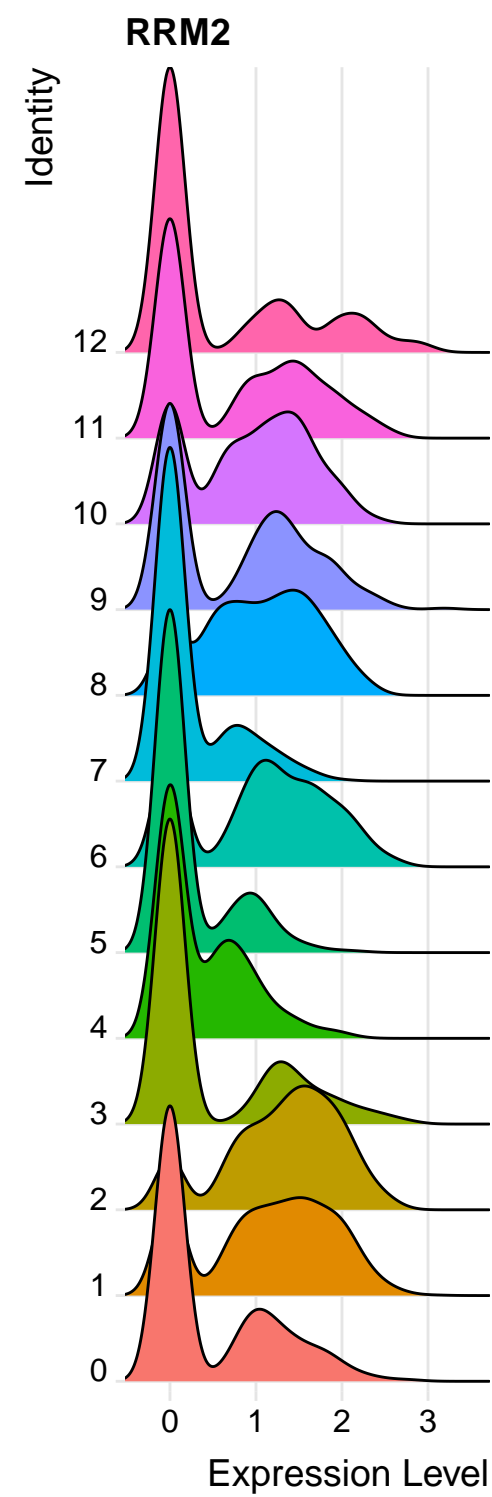

**MCM6**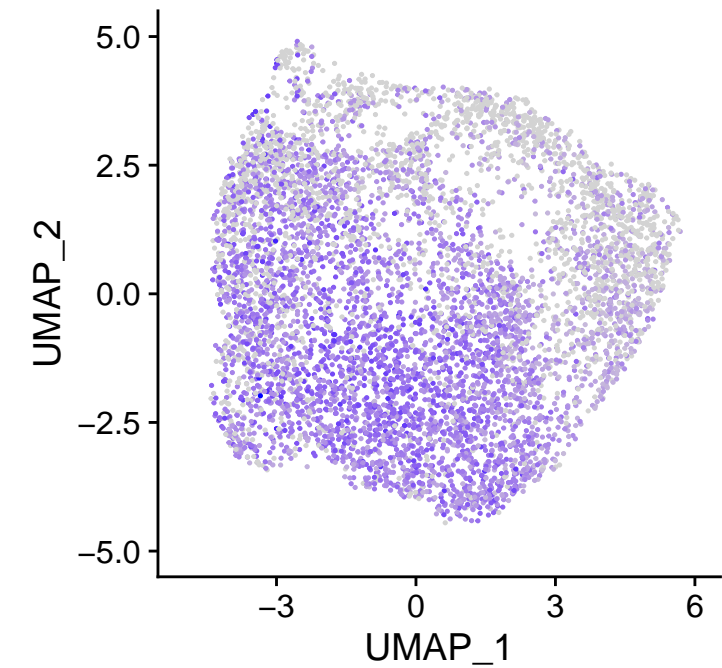**MSH6**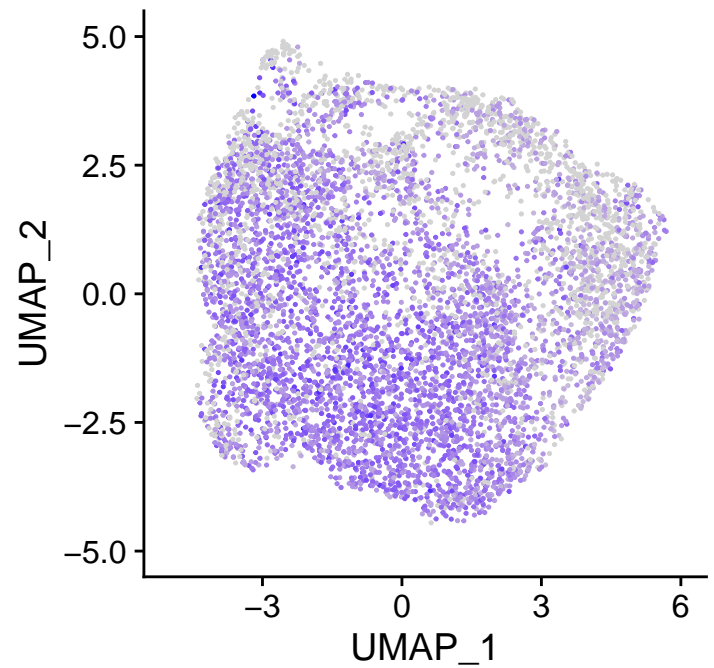**UHRF1**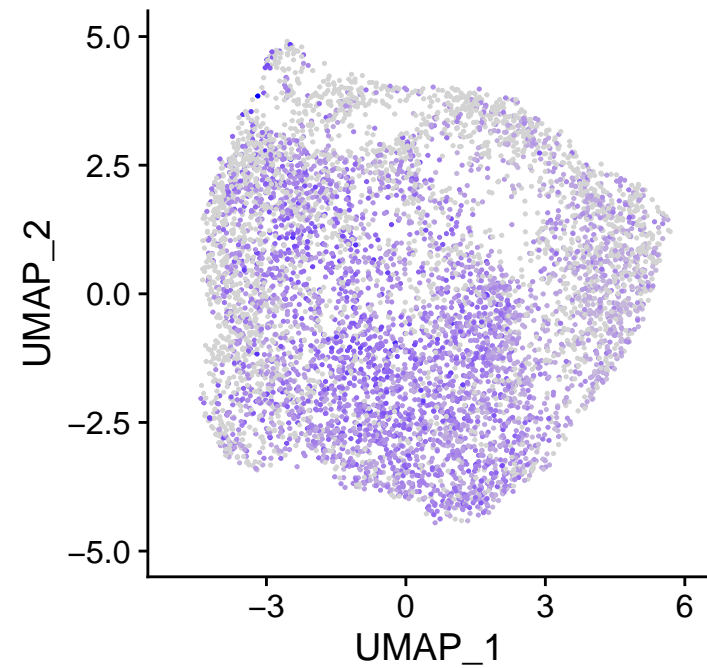**HELLS**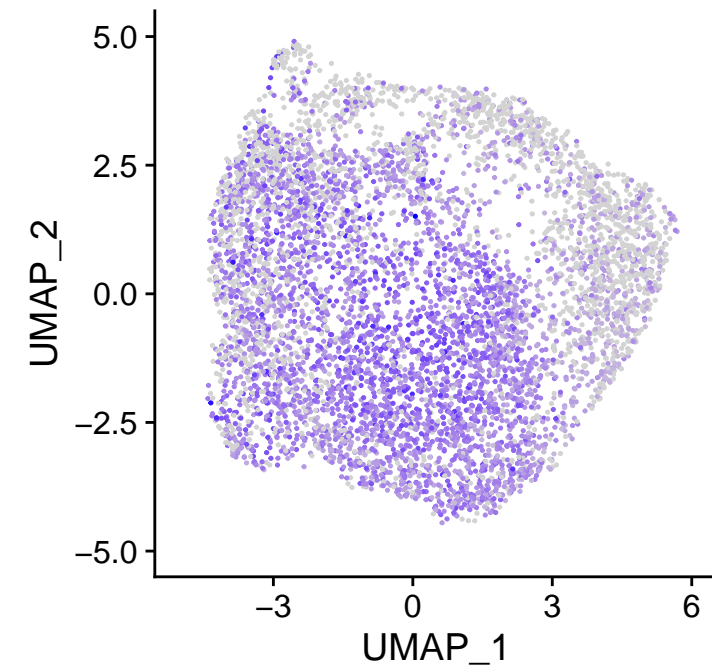**MCM3**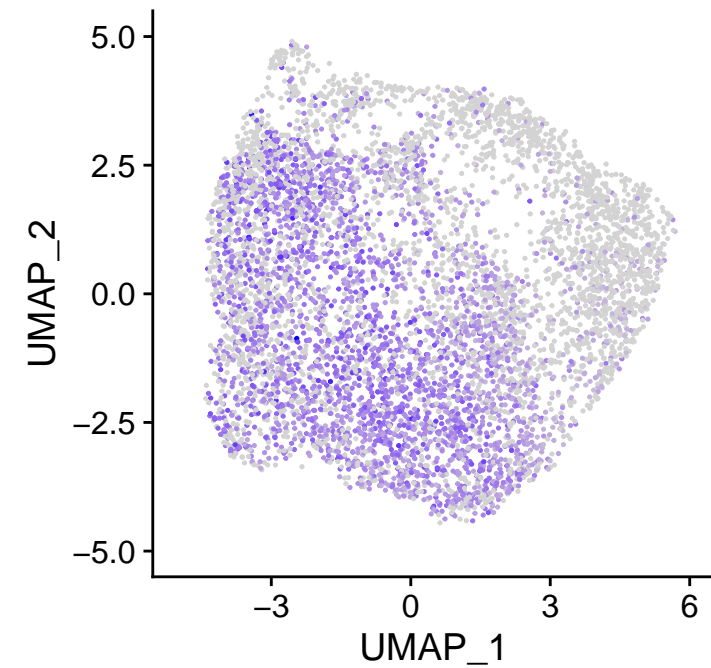**PCNA**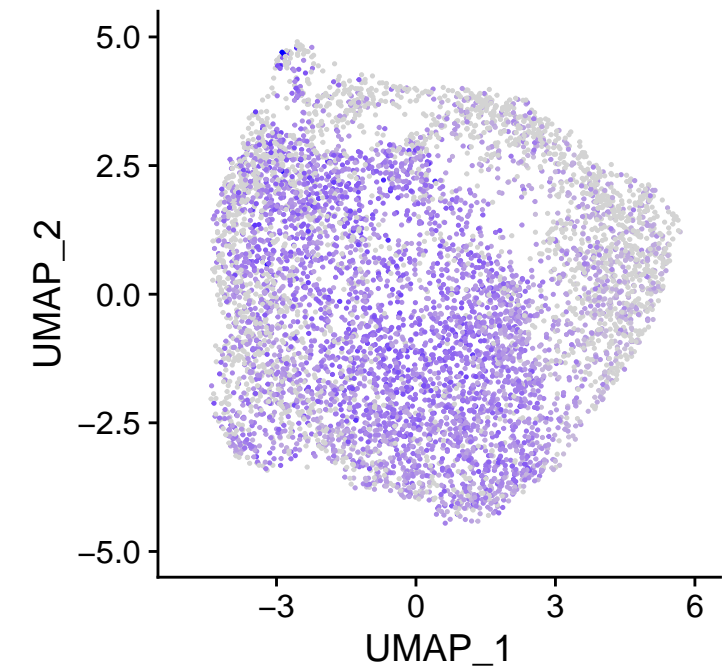**TOPBP1**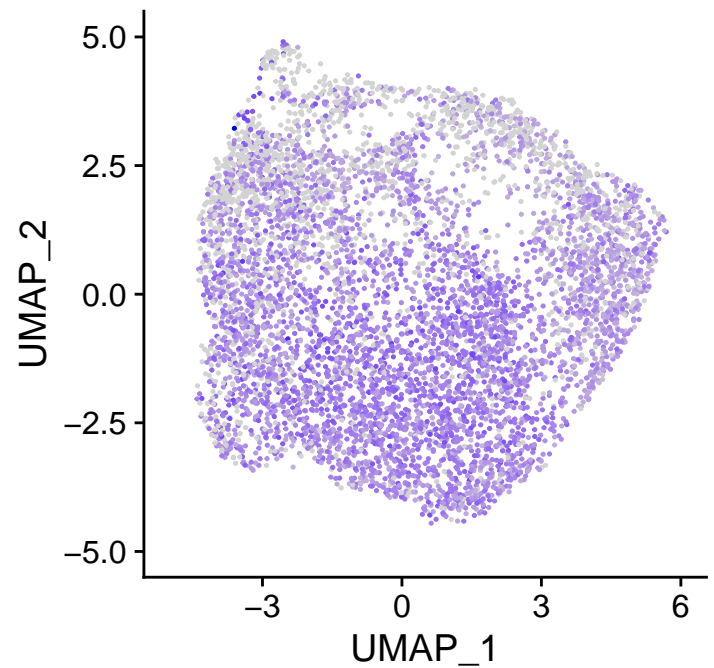**ENSCAFG00000030087**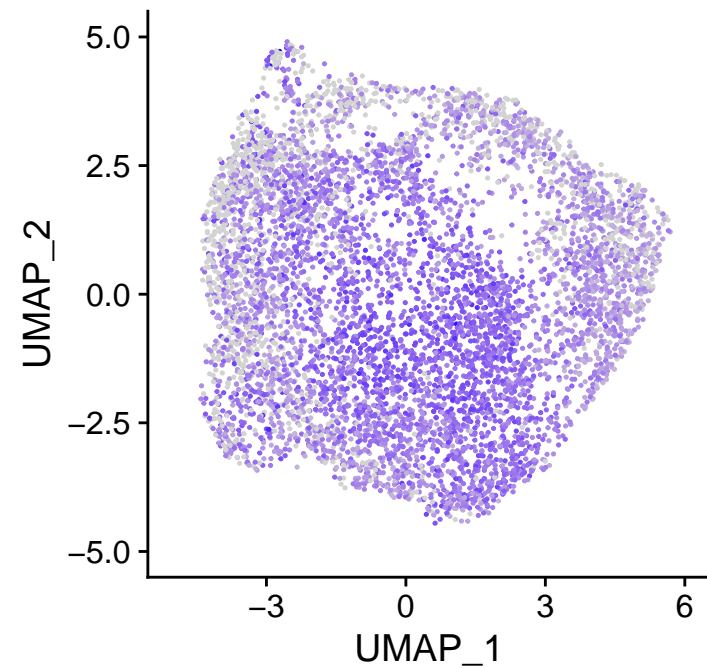**MSH2**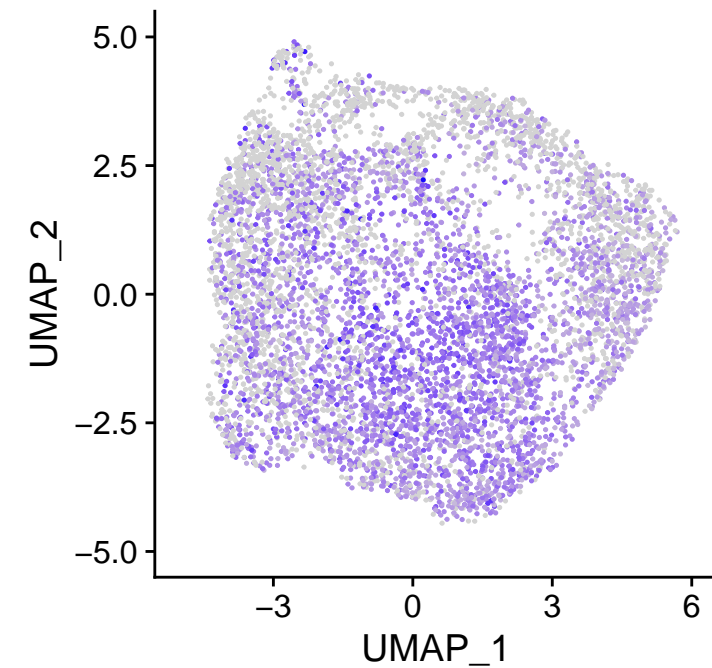**RRM2**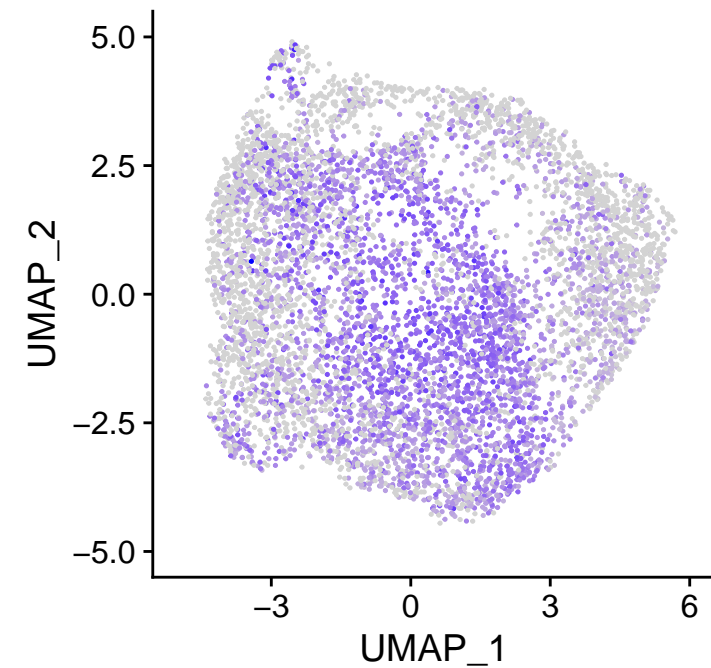



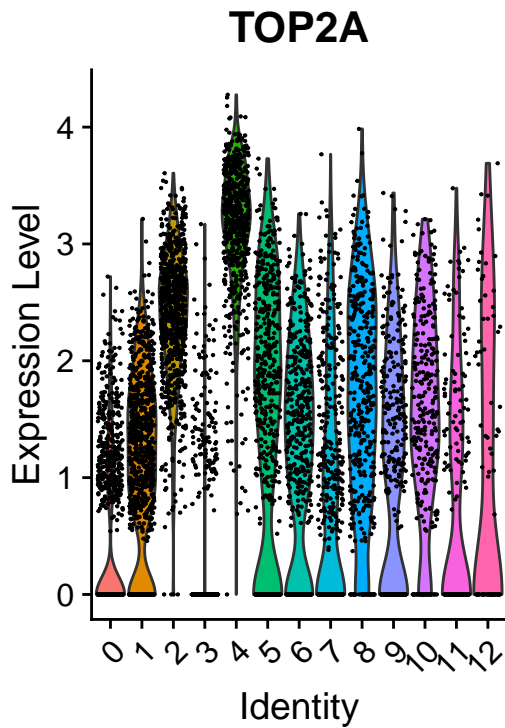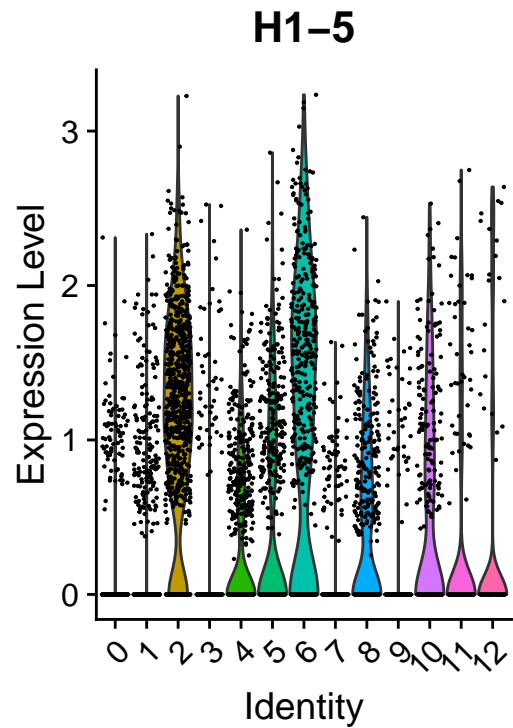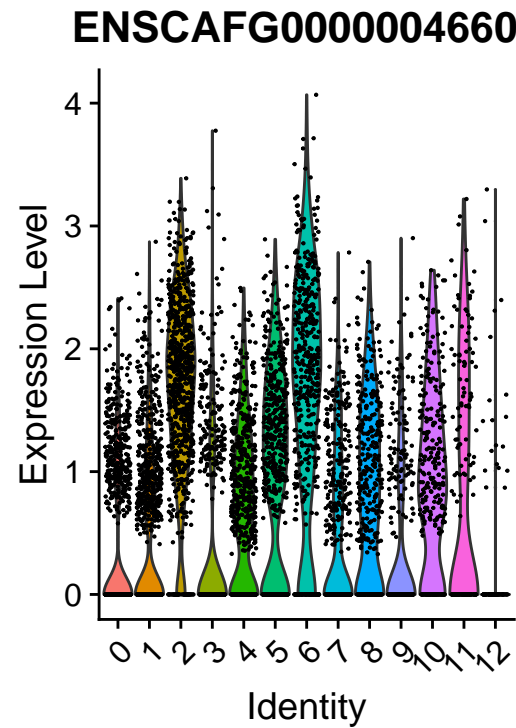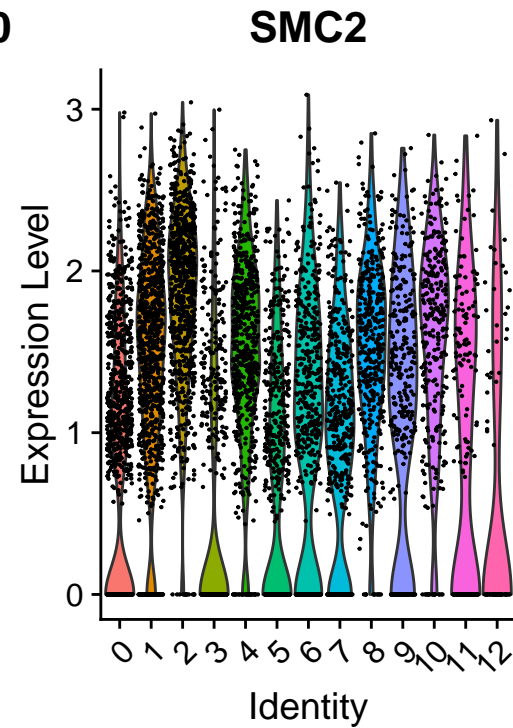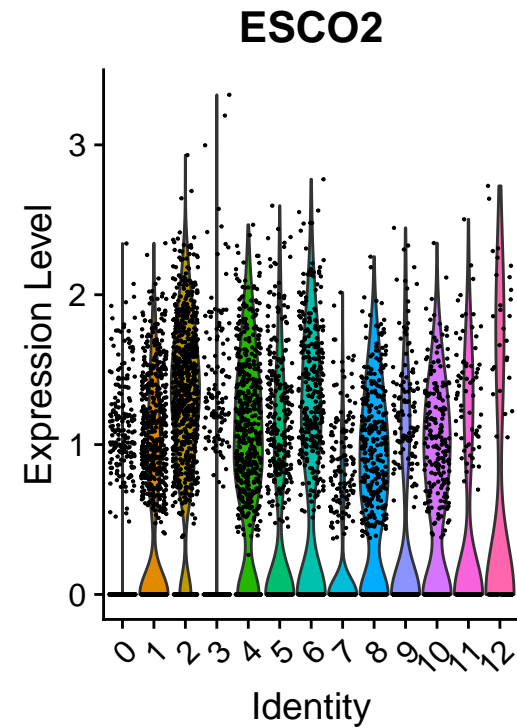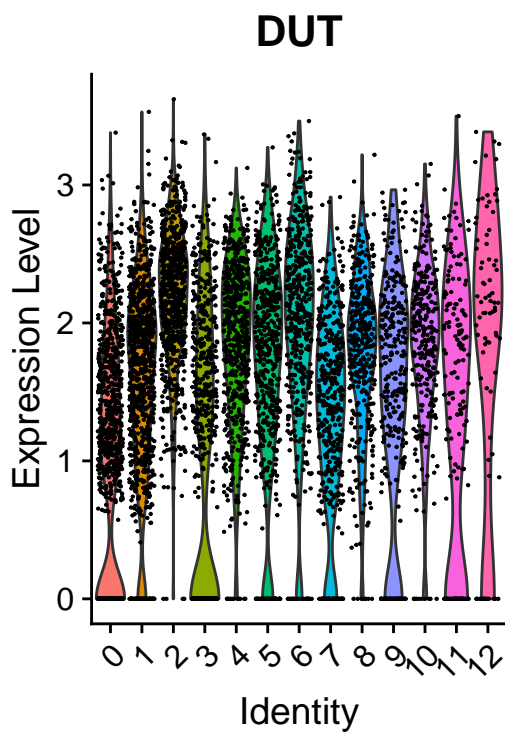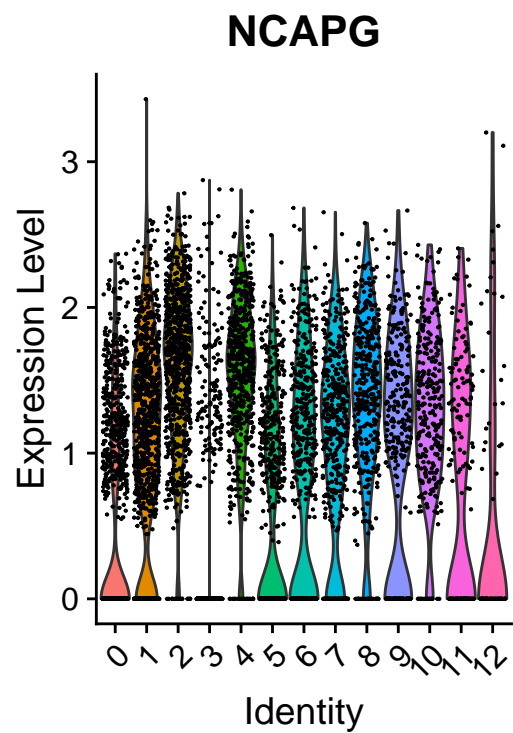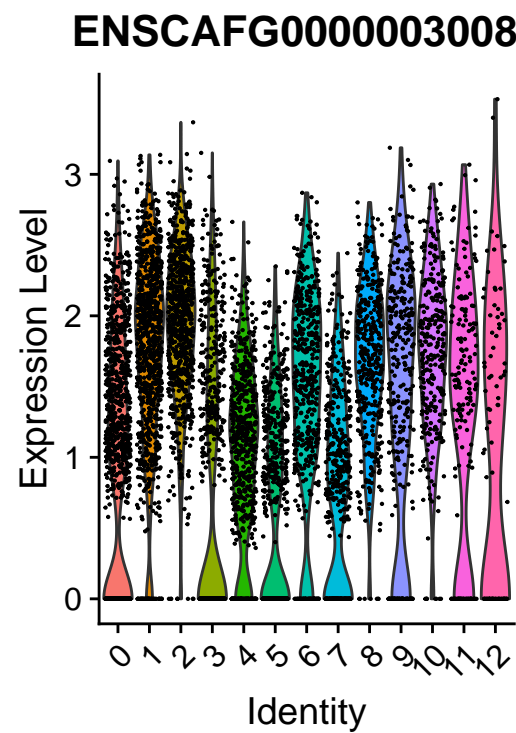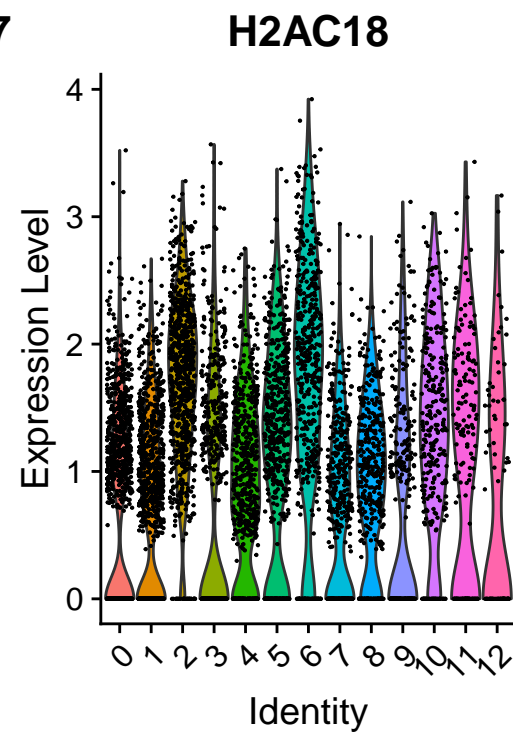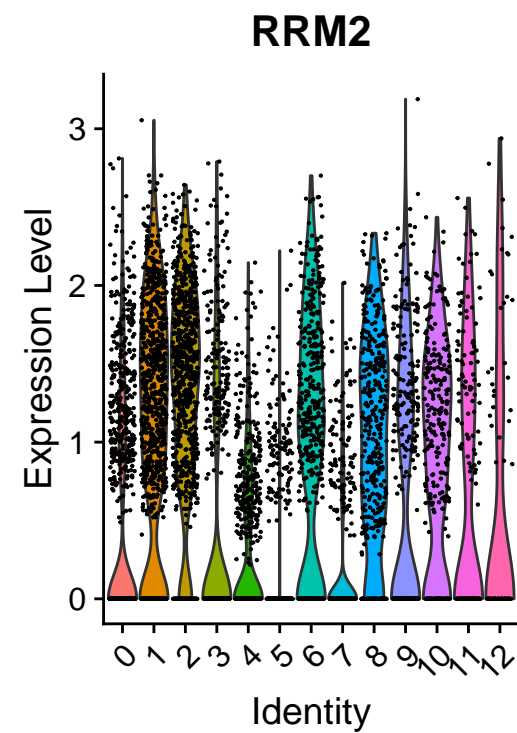

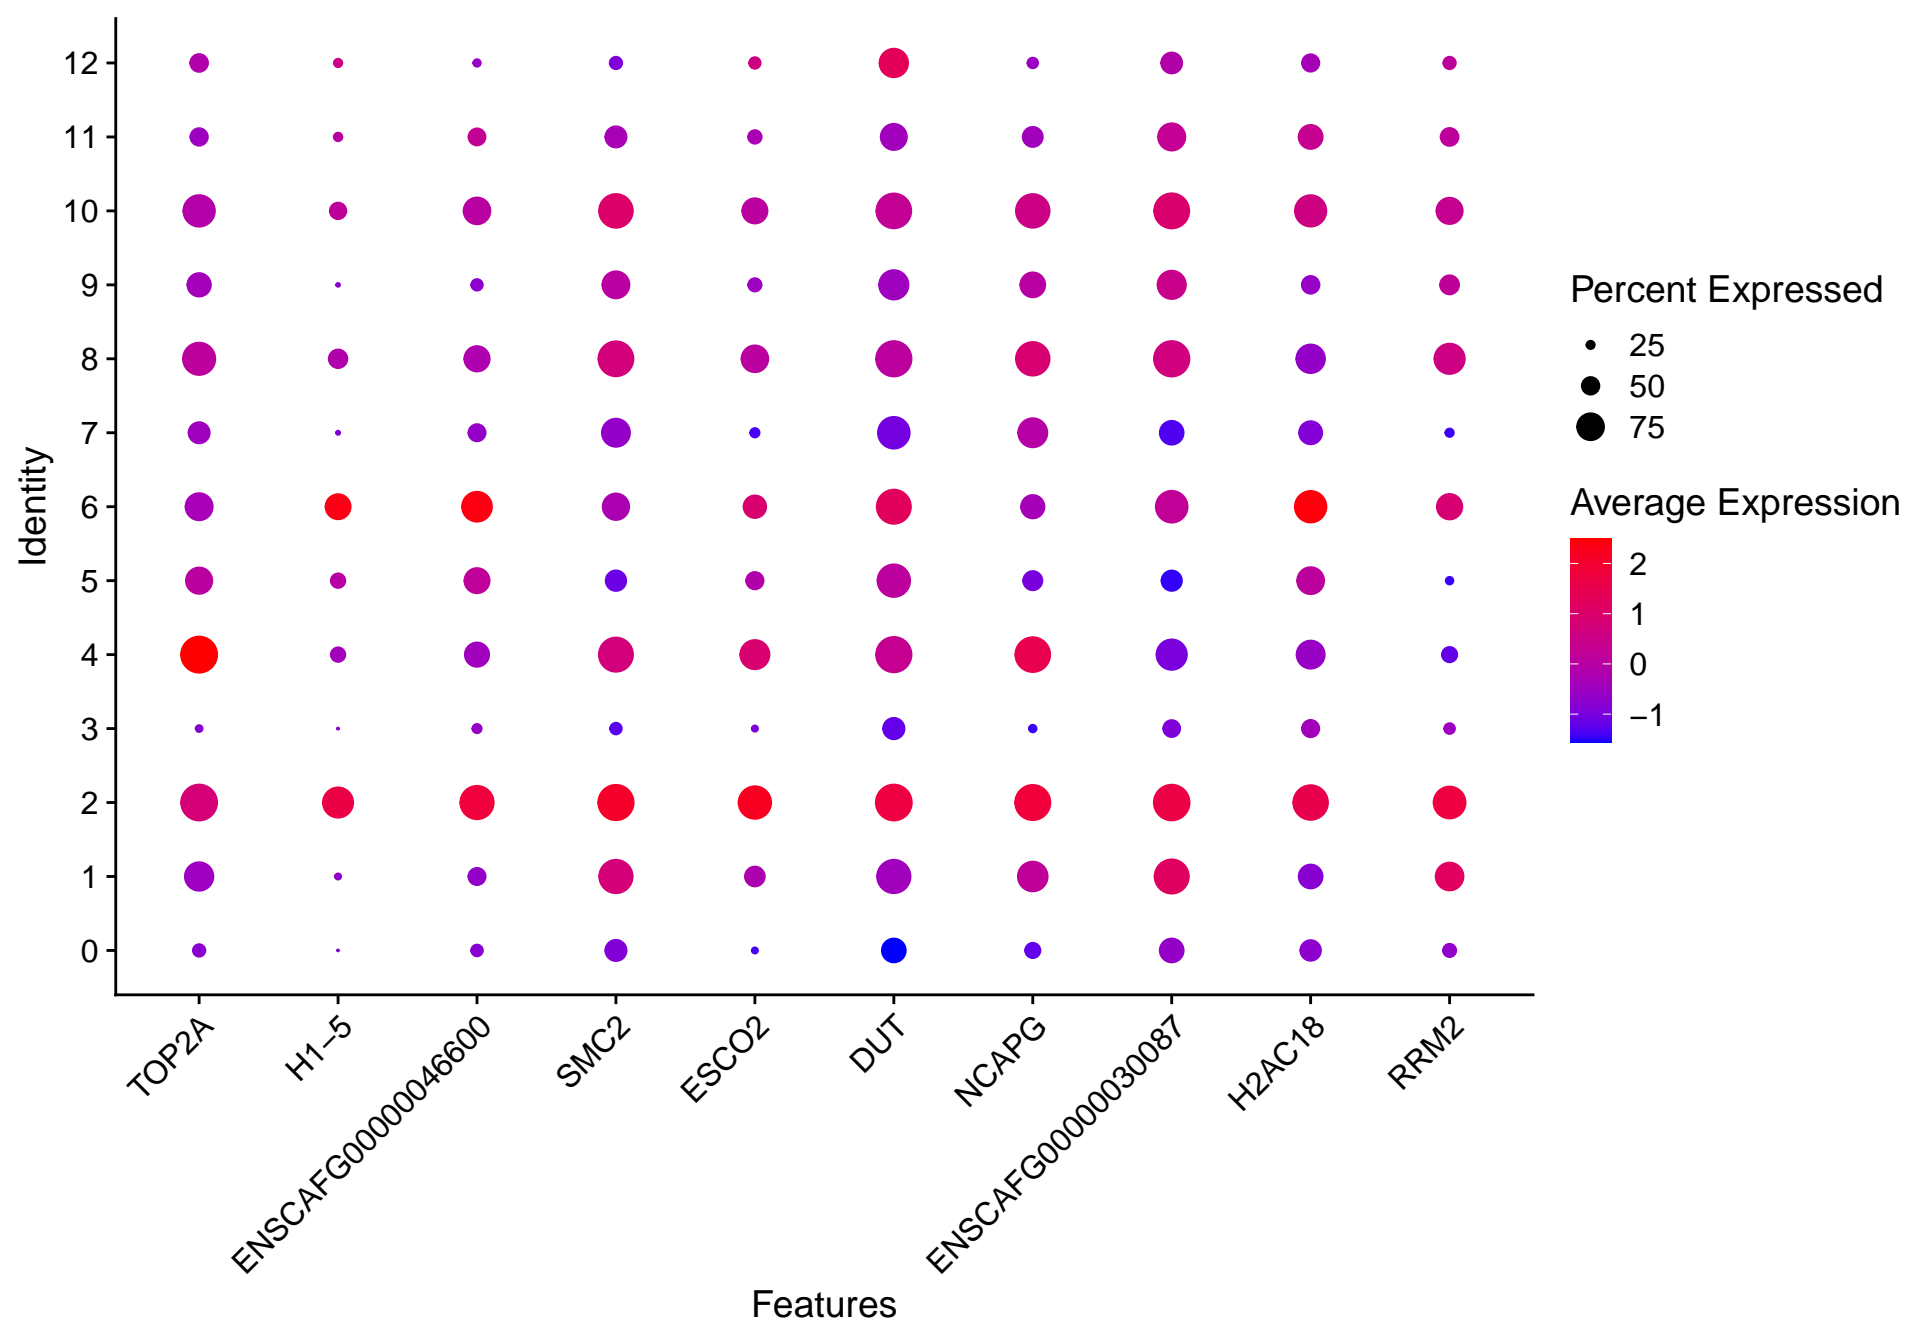





**TOP2A**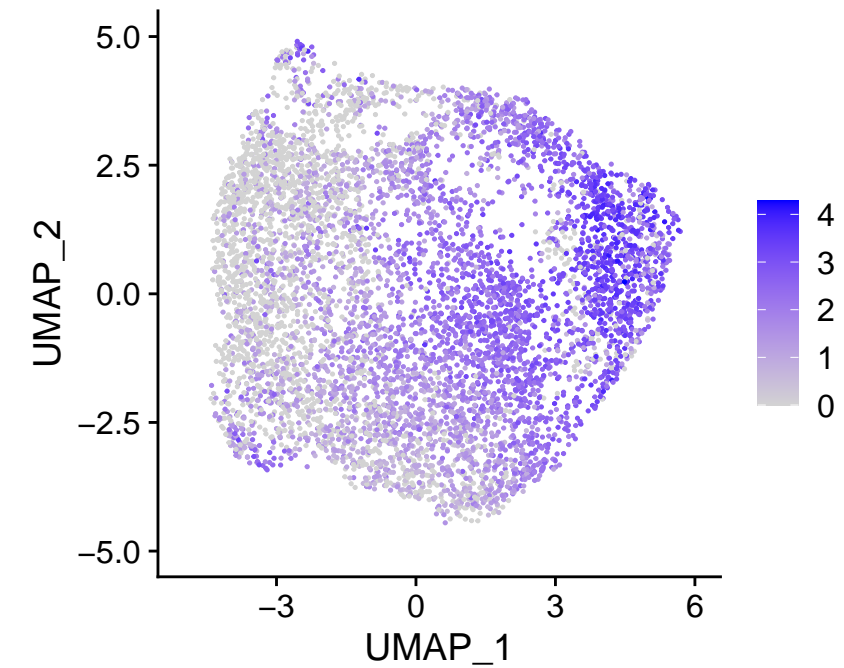**H1-5**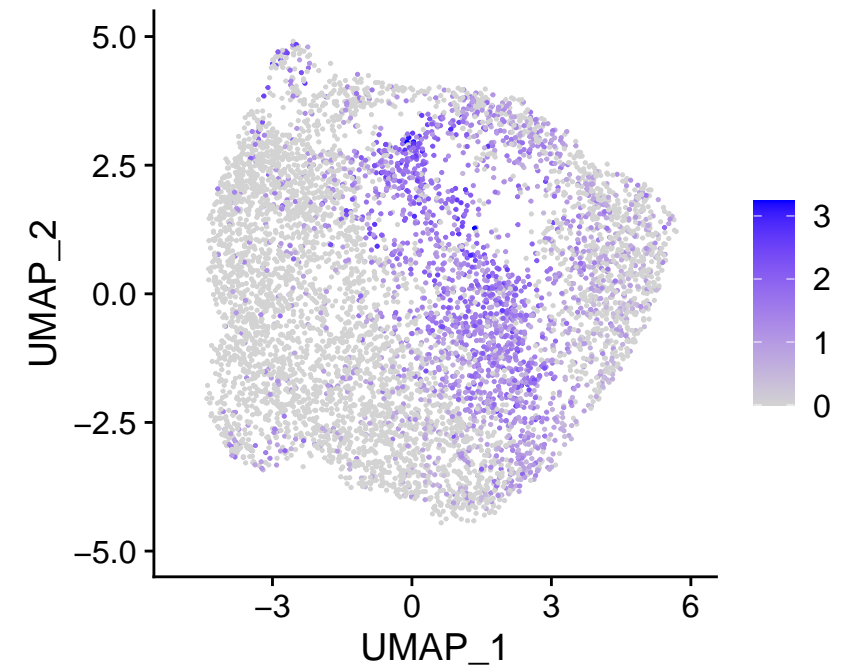**ENSCAFG00000046600**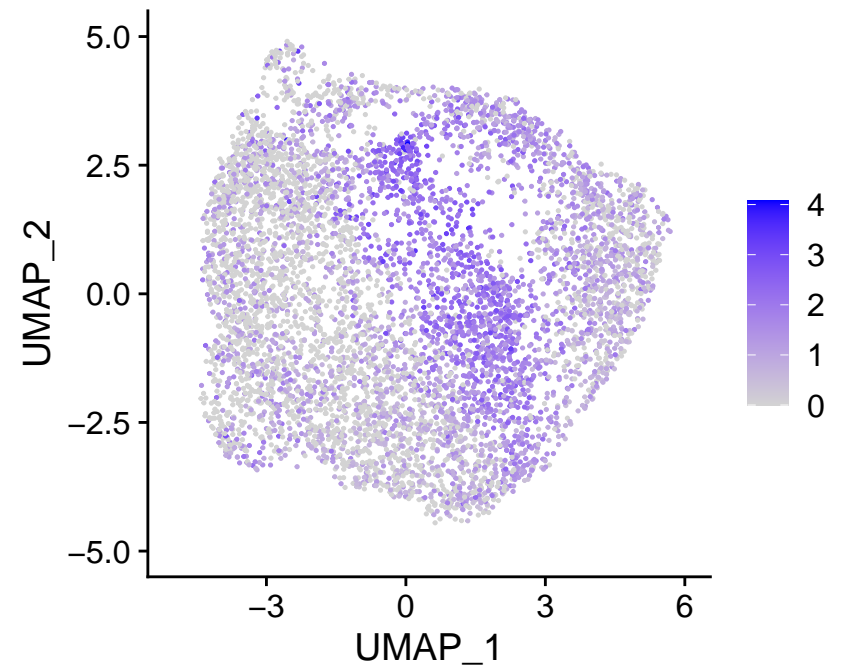**SMC2**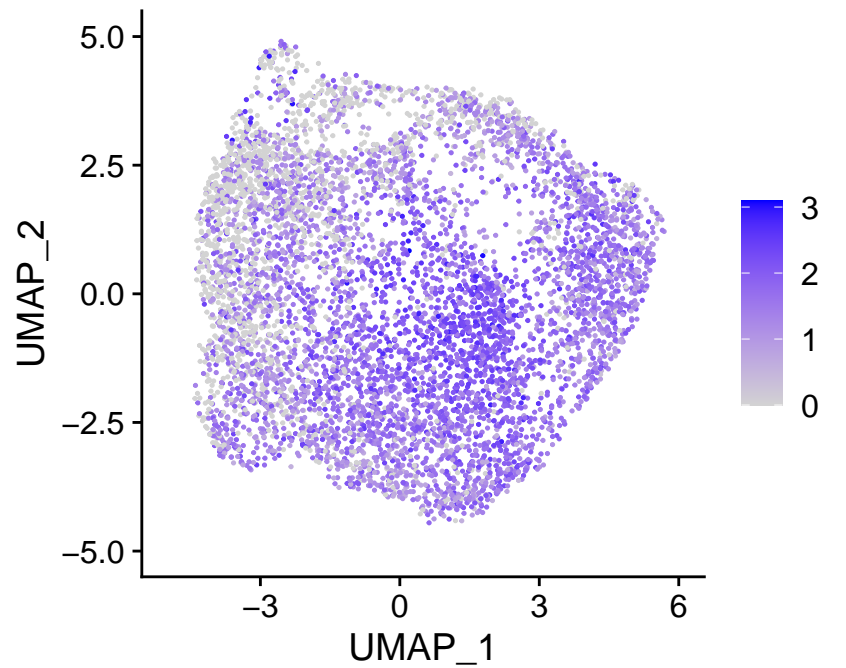**ESCO2**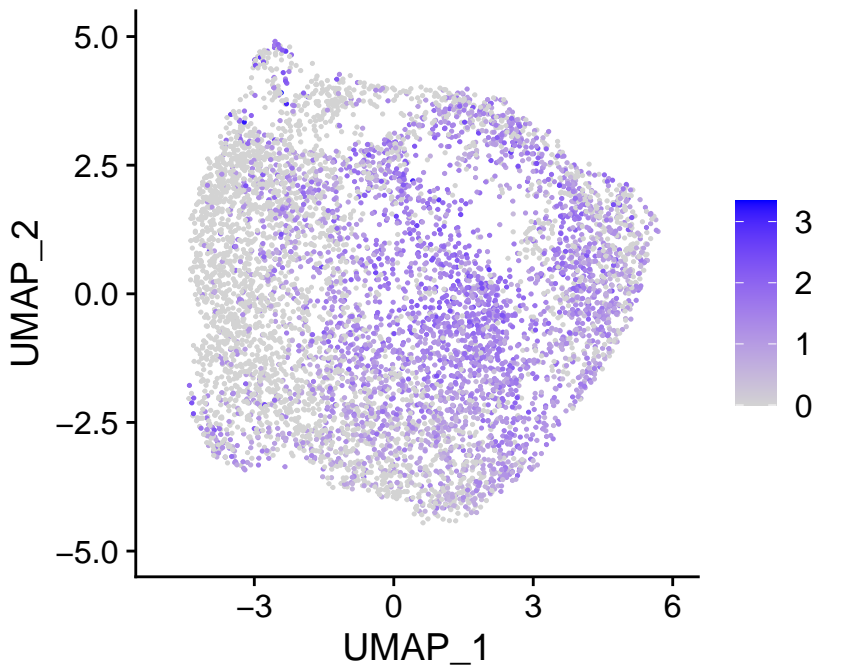**DUT**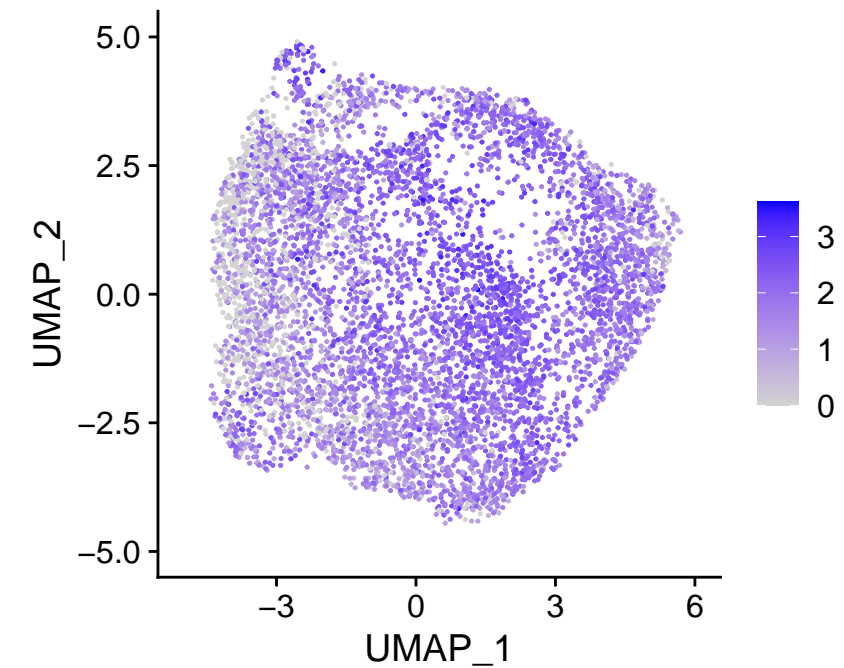**NCAPG**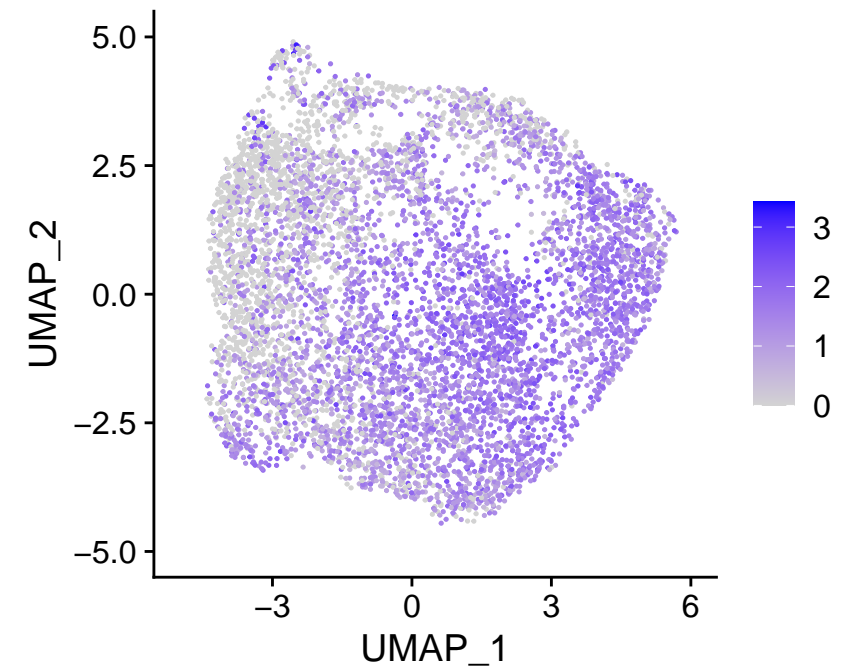**ENSCAFG00000030087**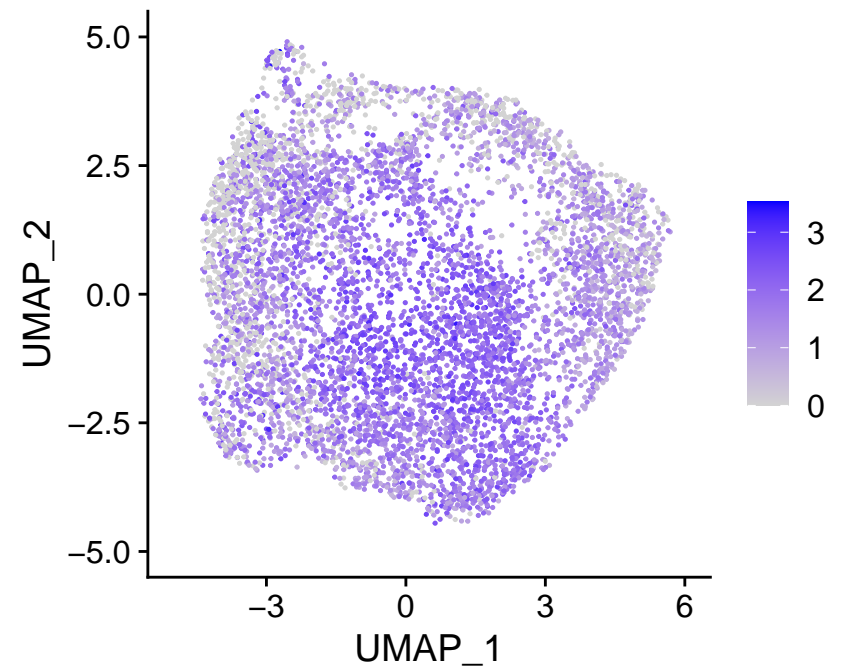**H2AC18**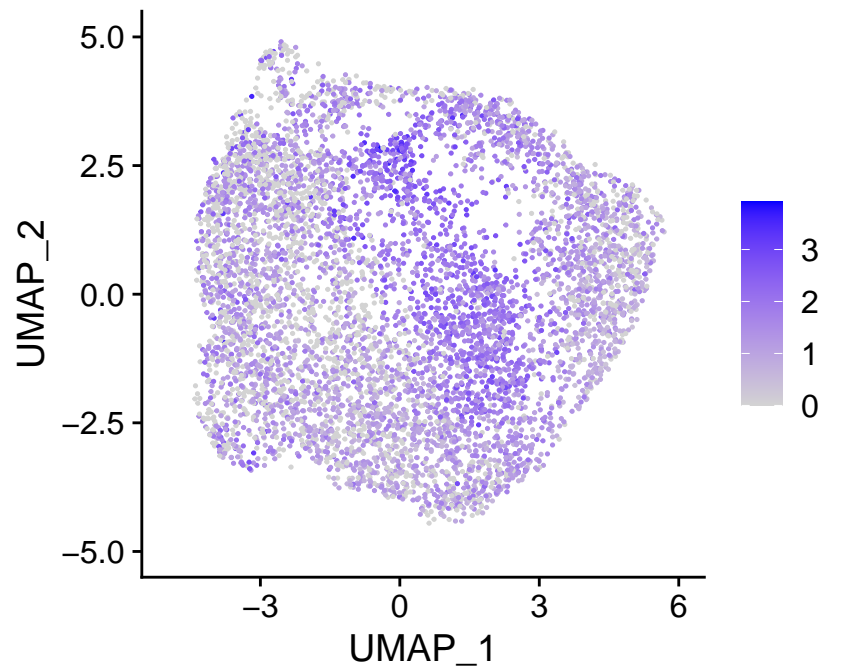**RRM2**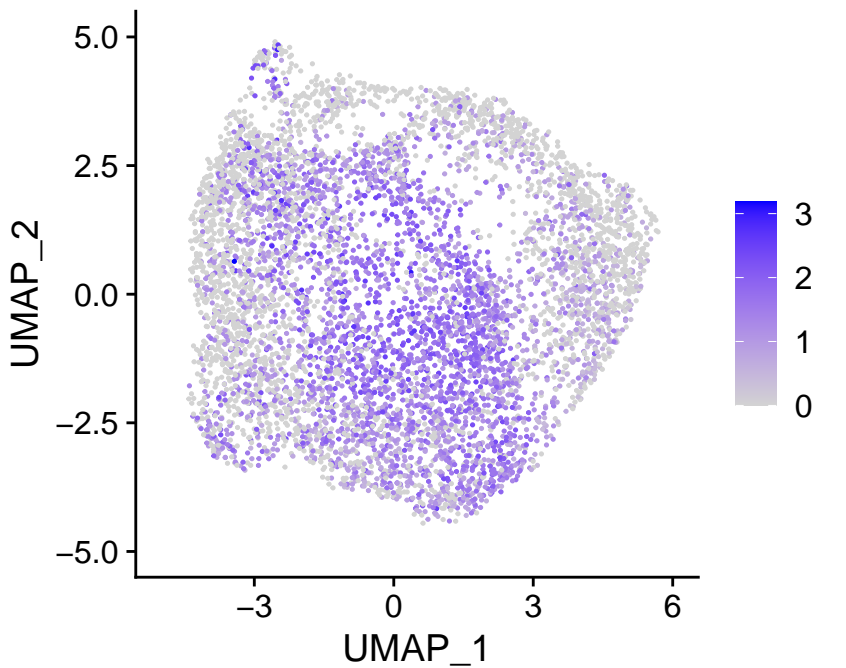



**ENSCAFG00000022711**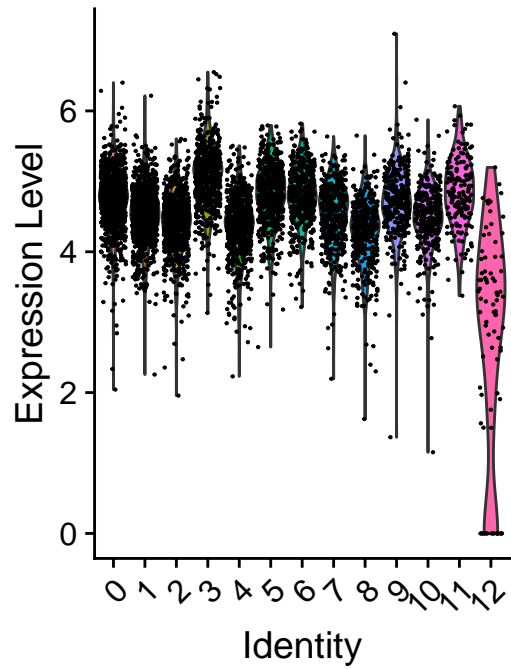**MT-CO3**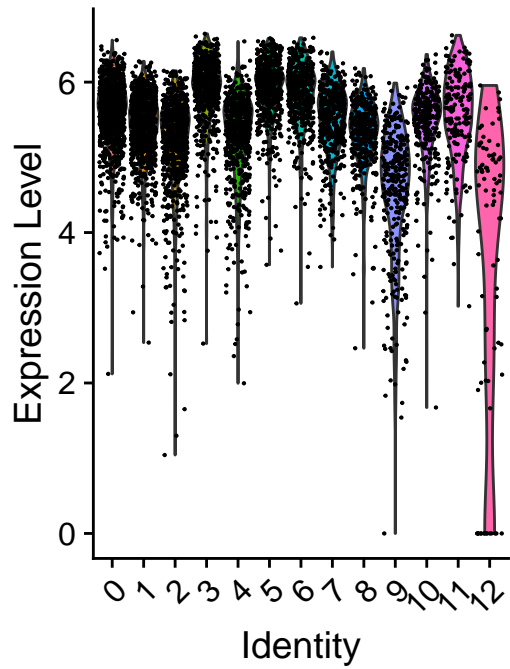**VPS28**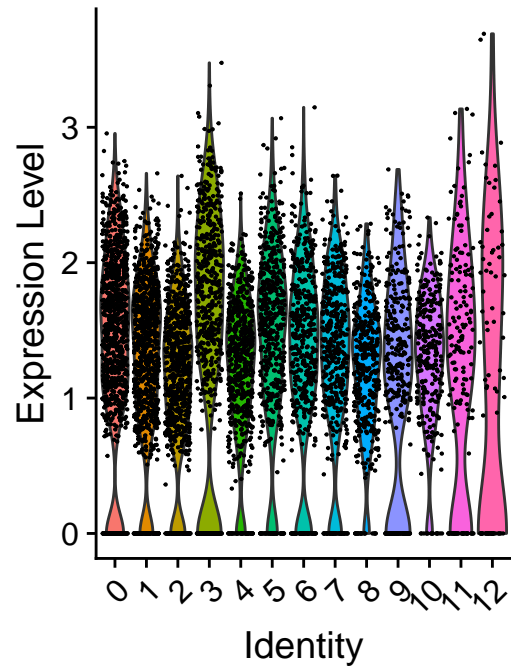**MT-CO1**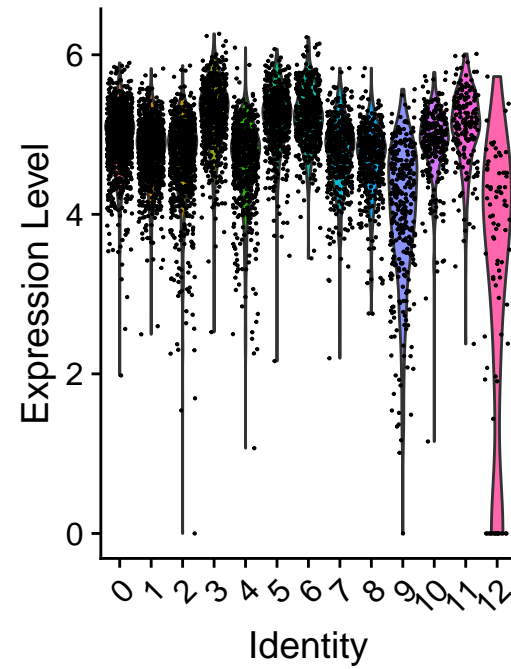**MT-CO2**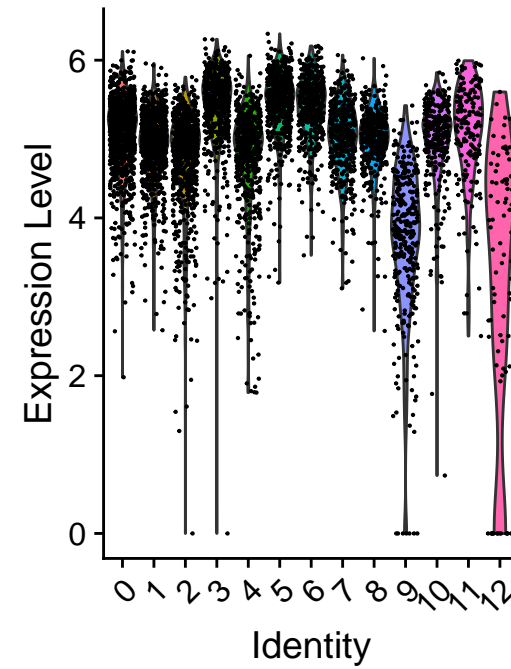**MT-ATP6**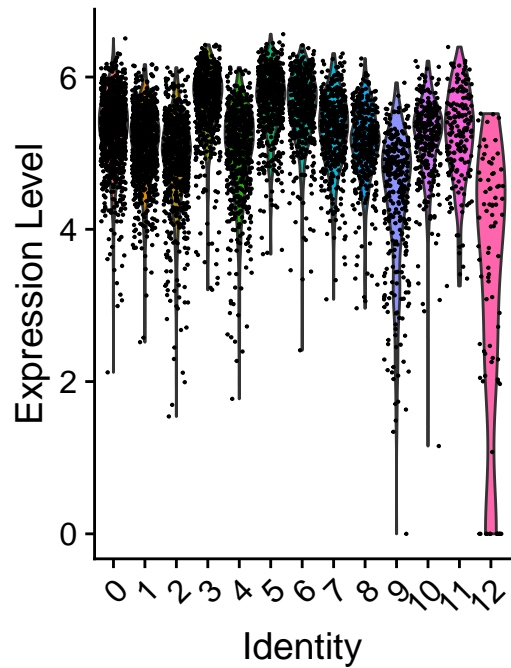**ENSCAFG00000022709**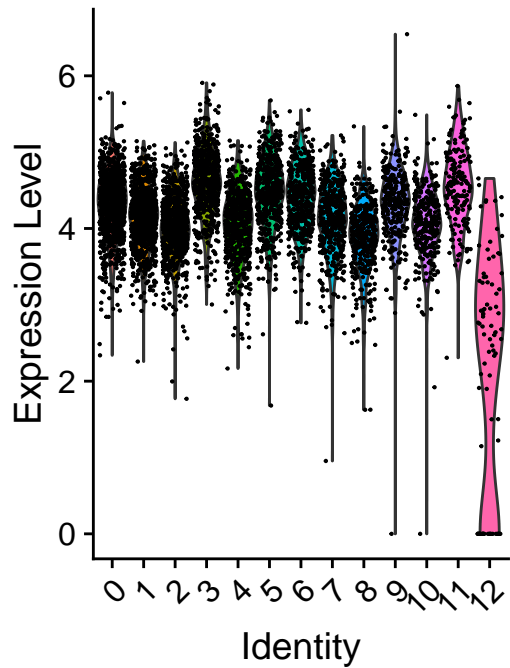**FOS**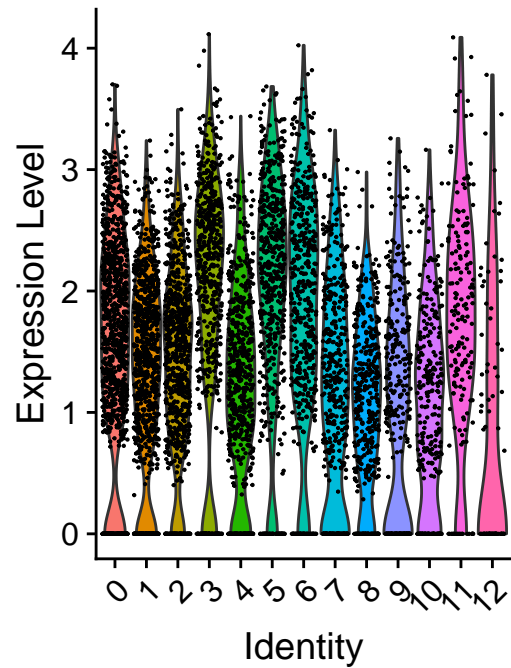**KLF6**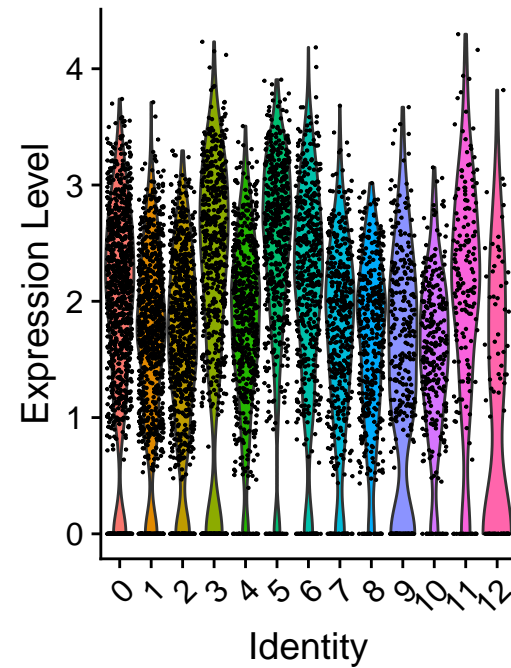**MT-CYB**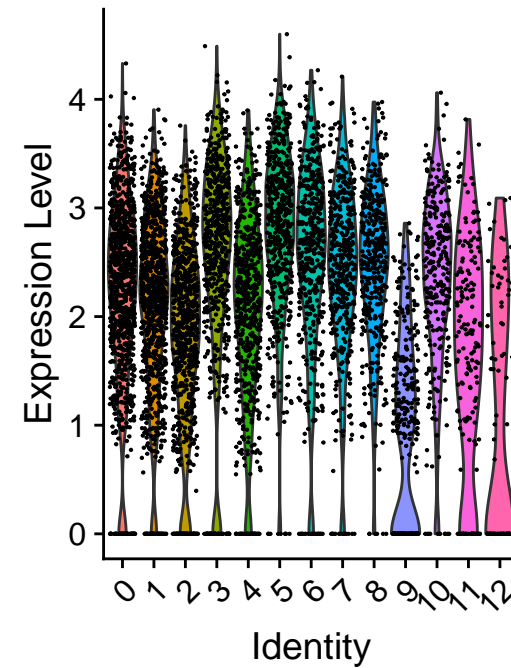

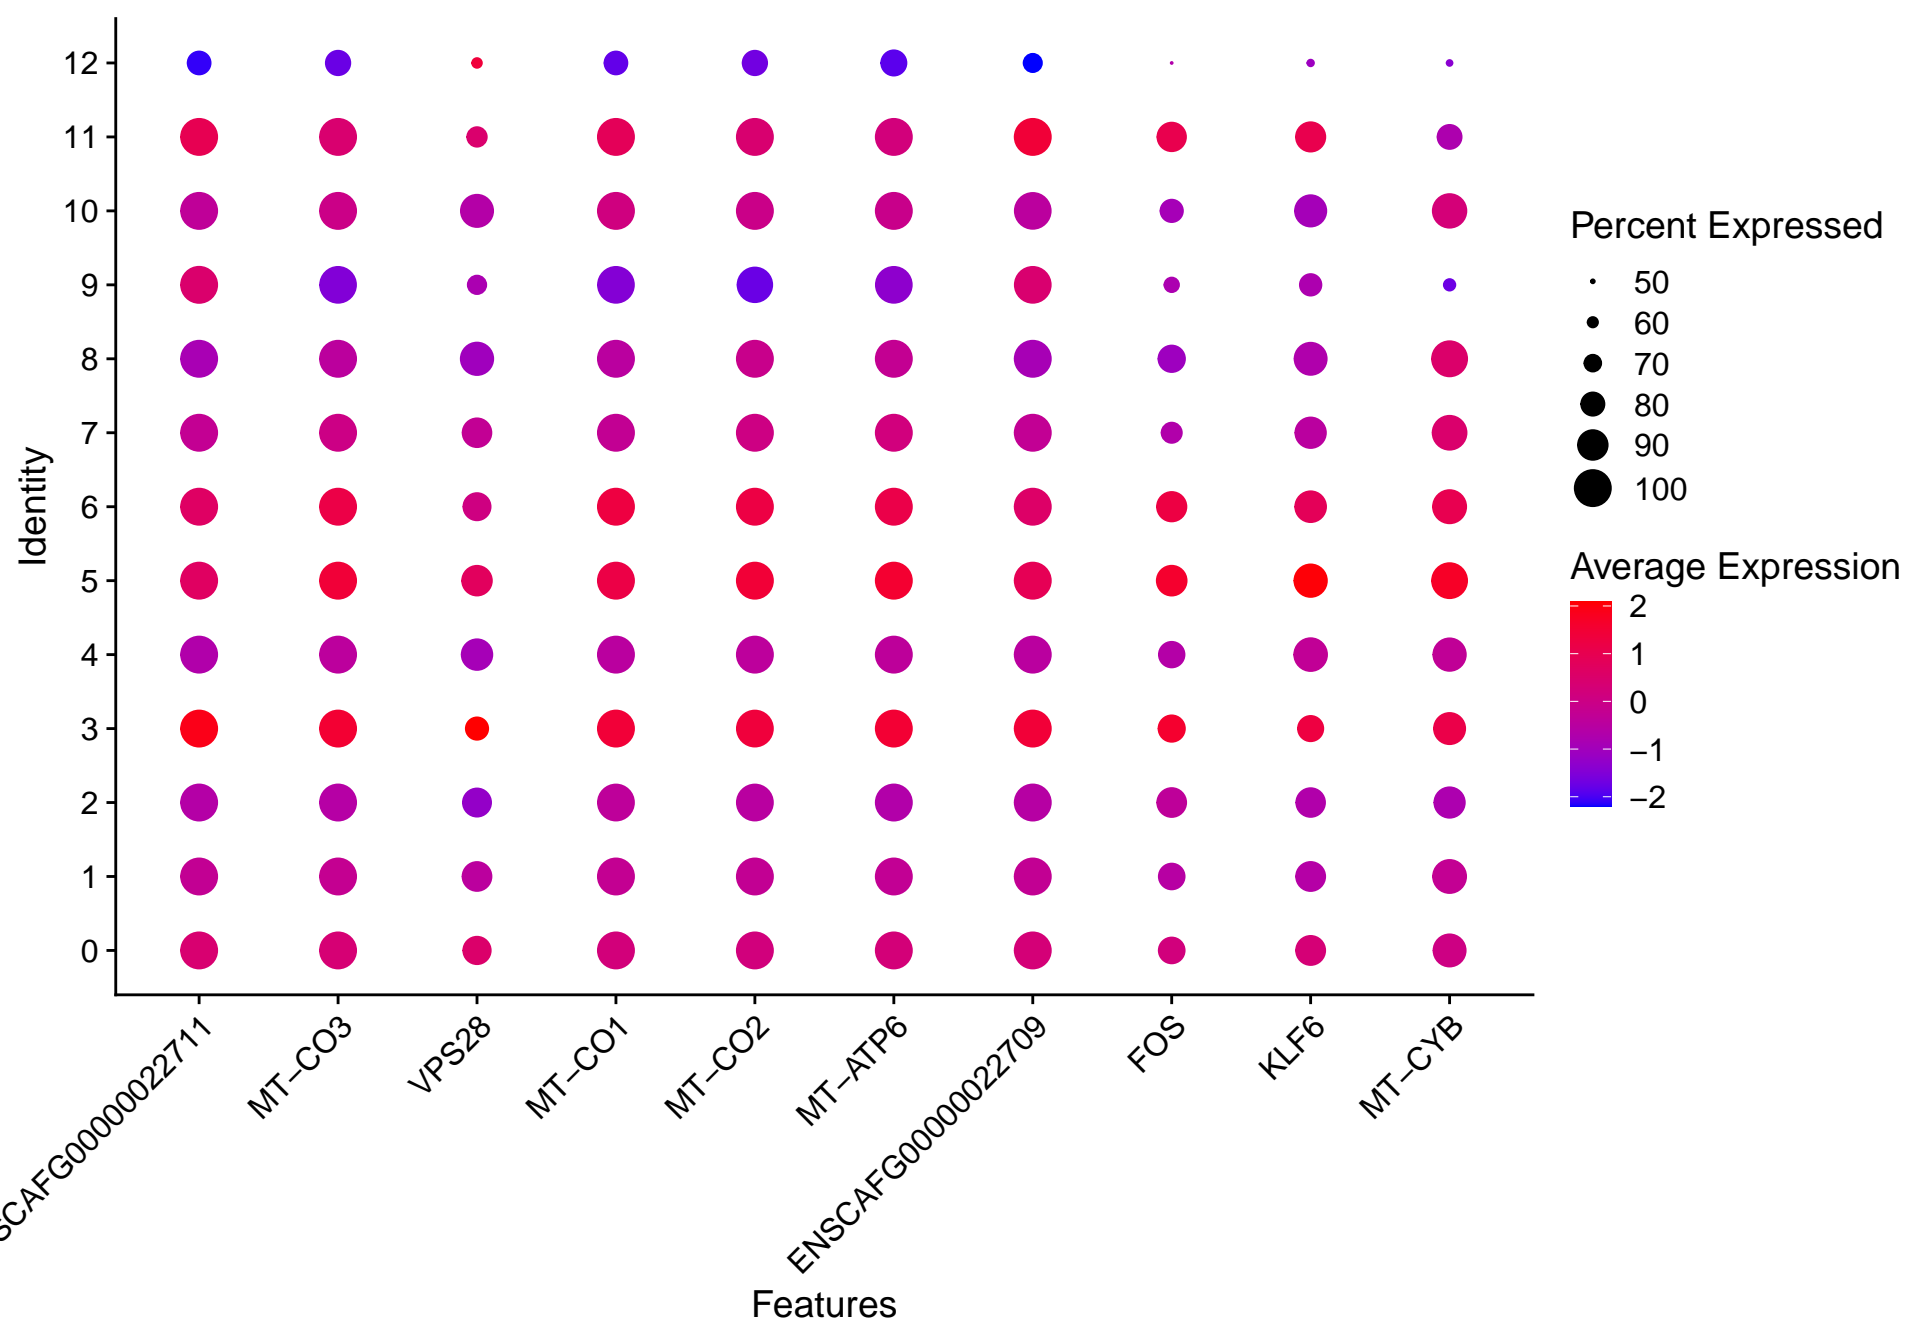



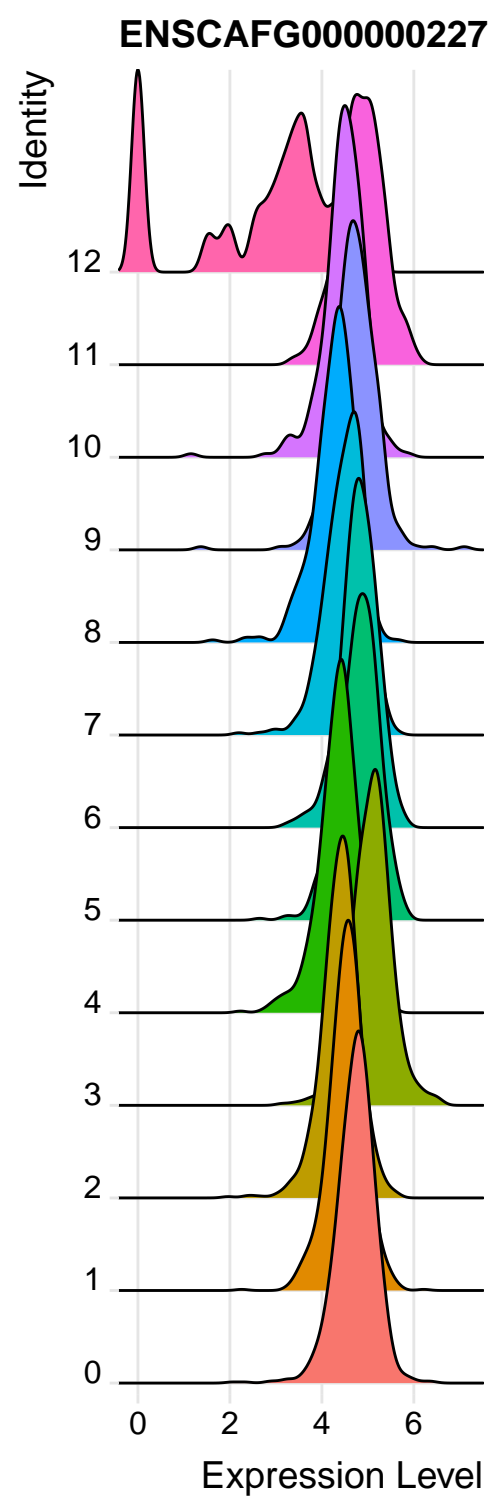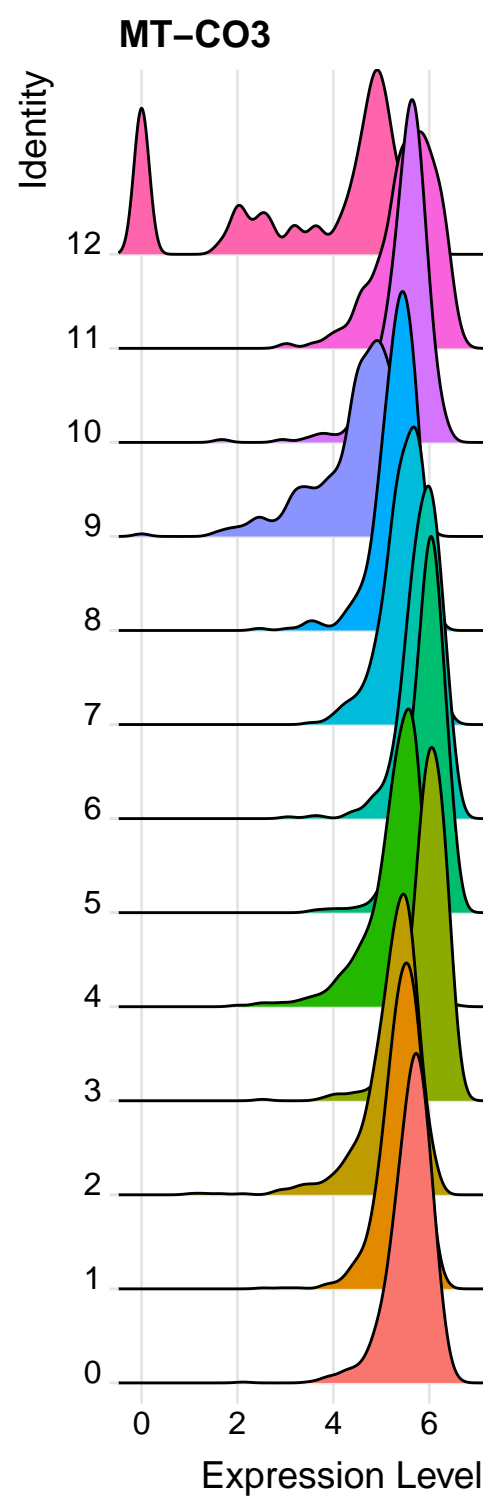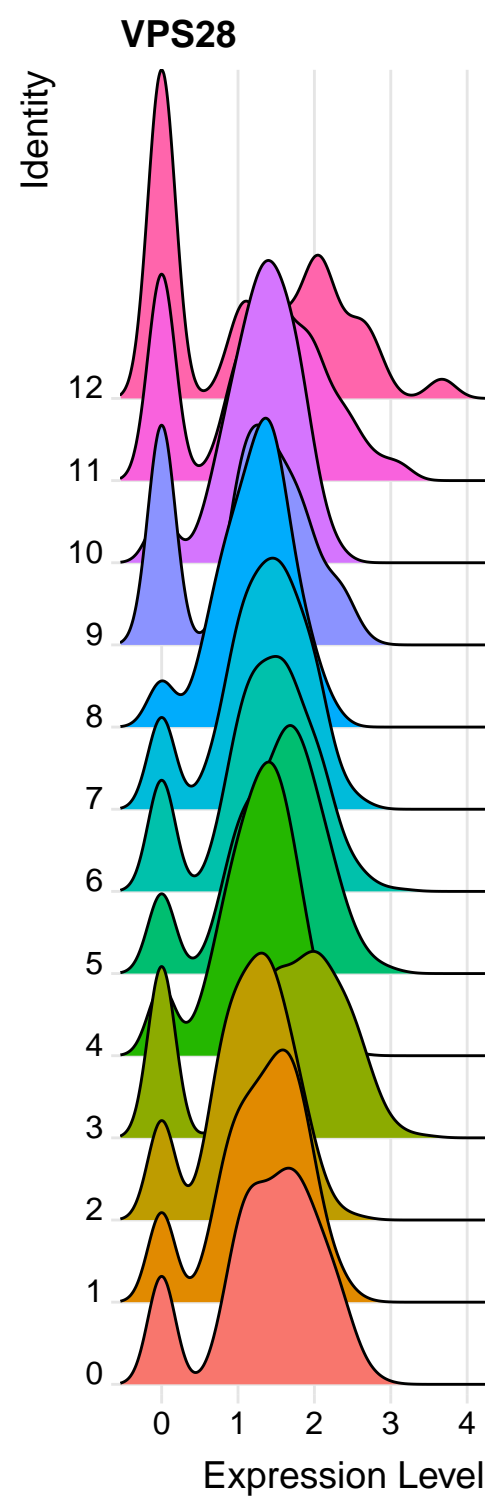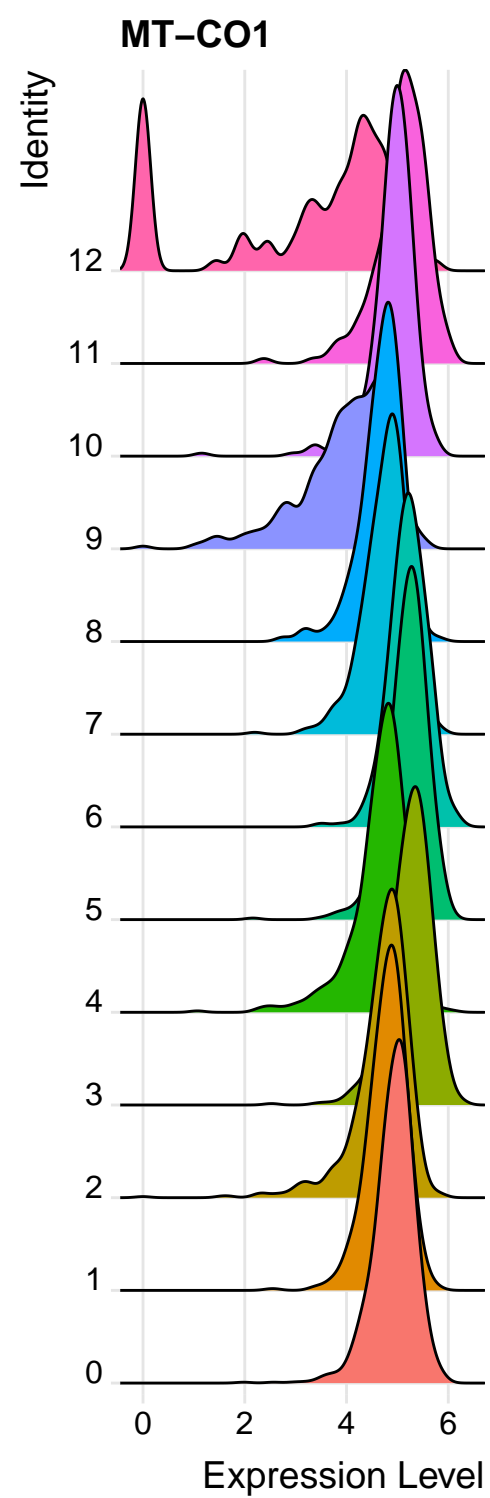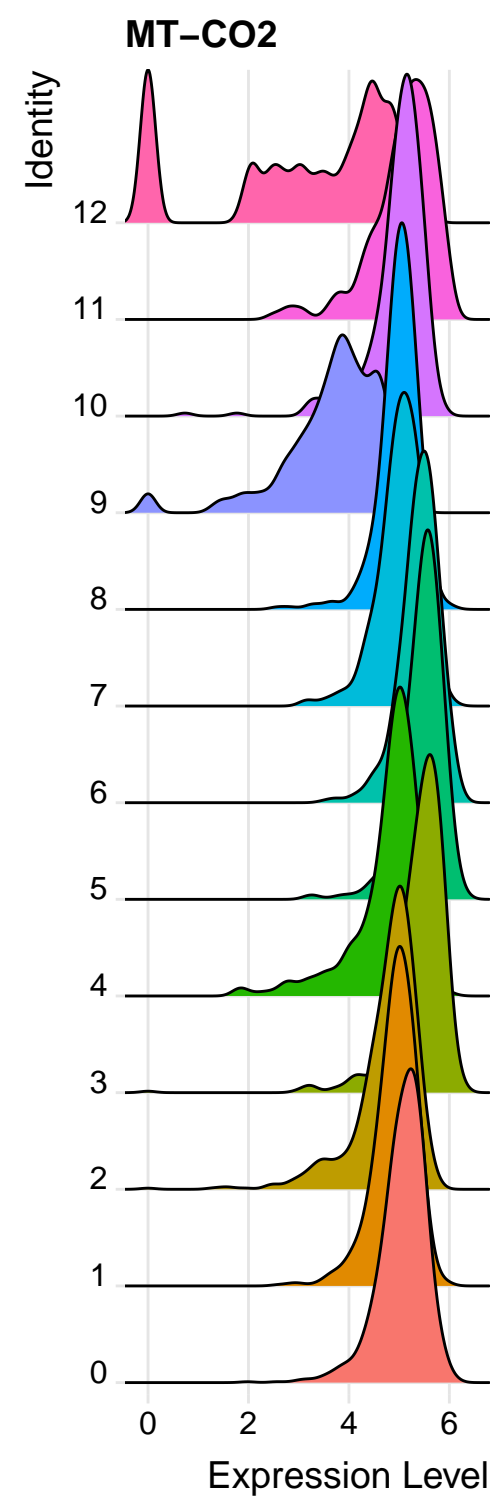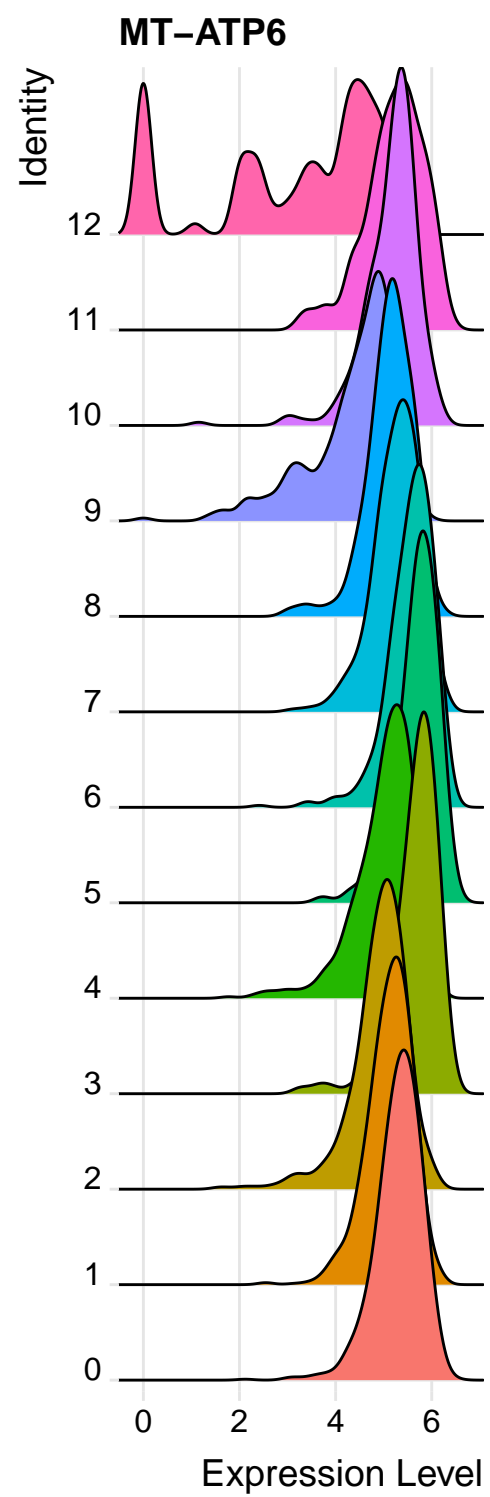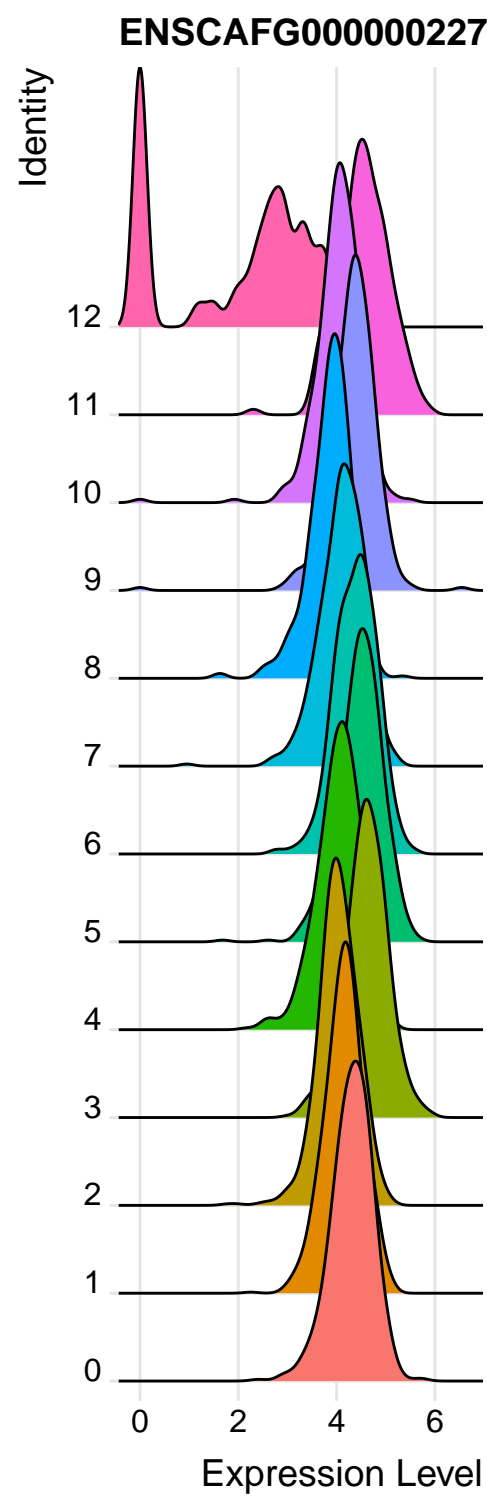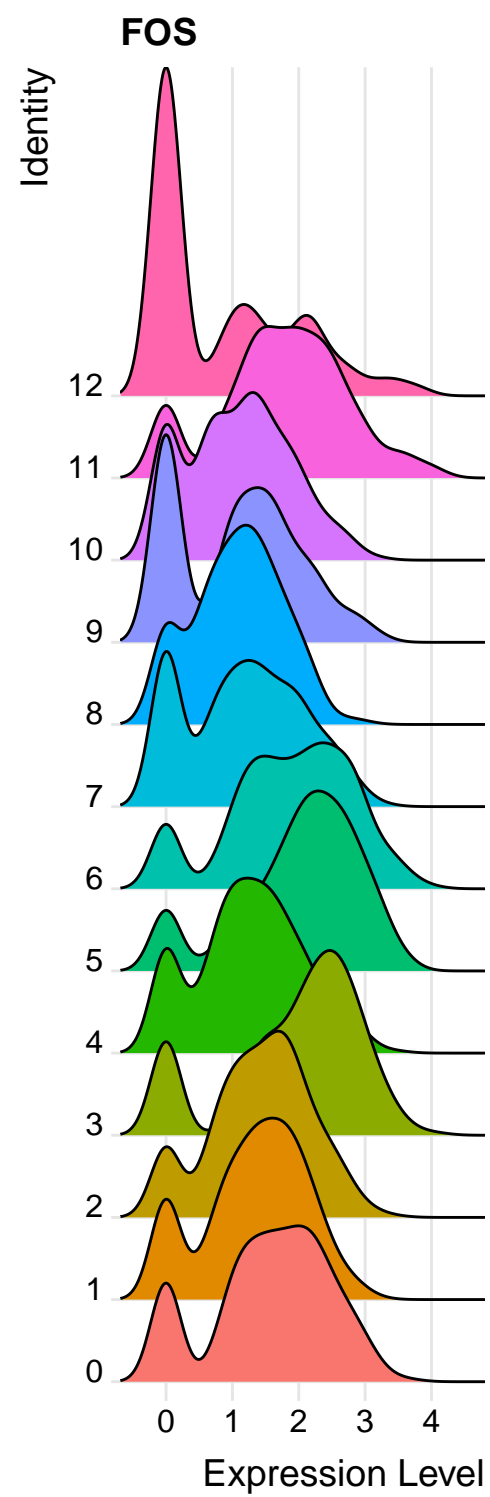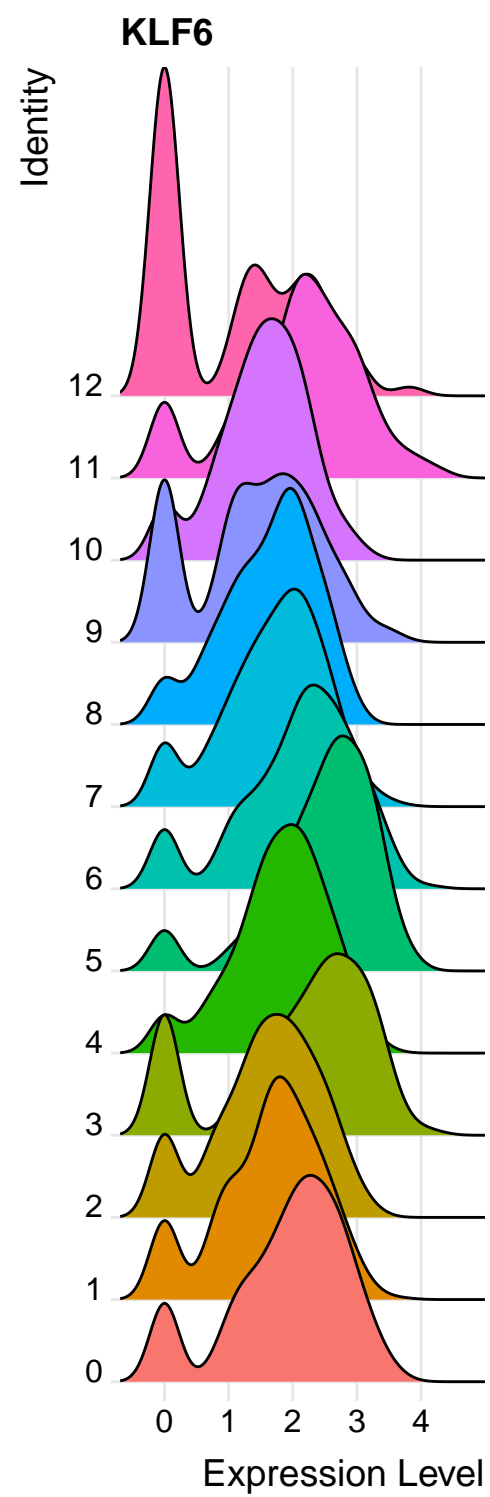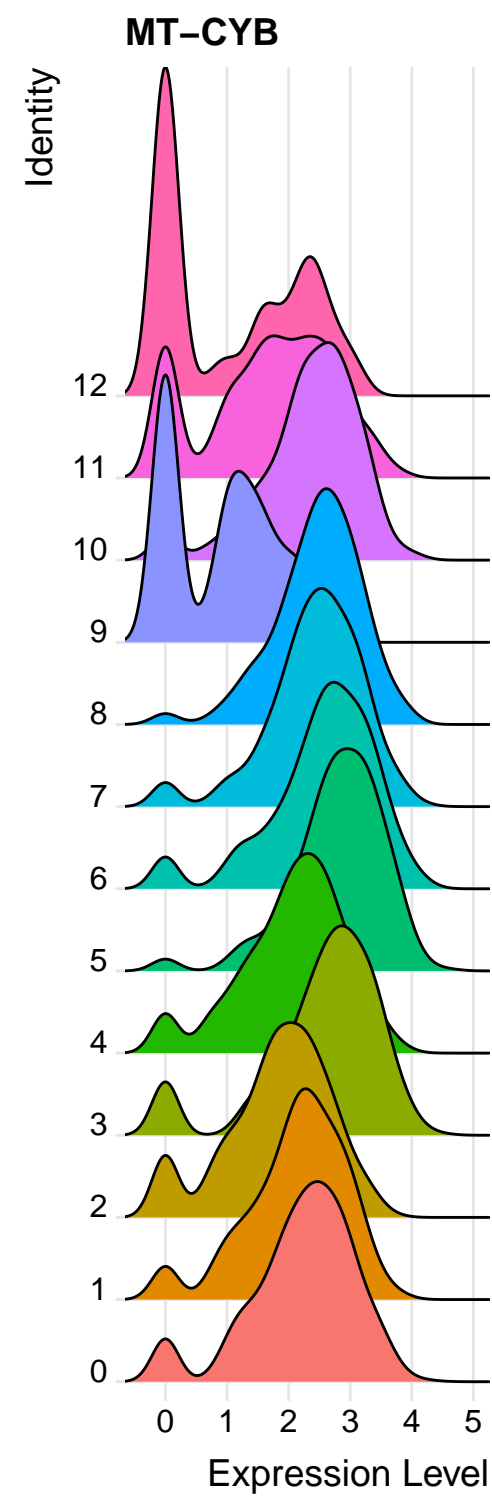

**ENSCAFG00000022711**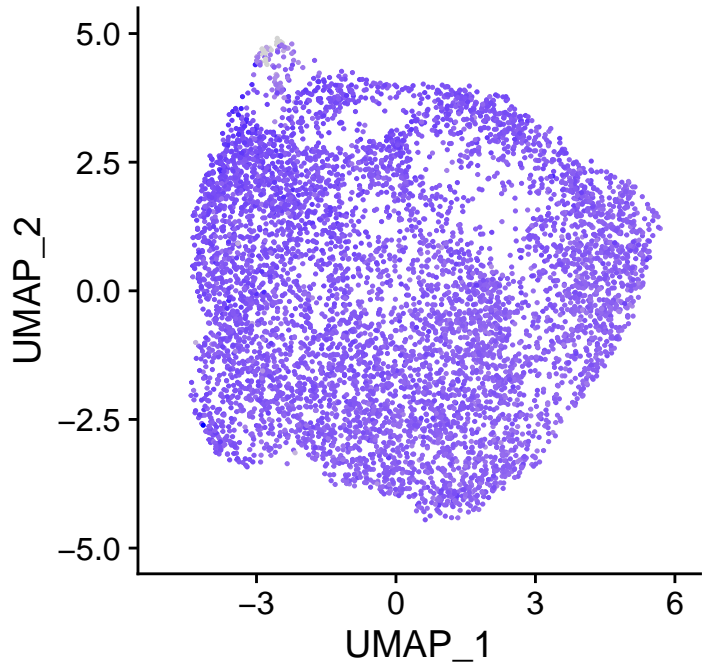**MT-CO3**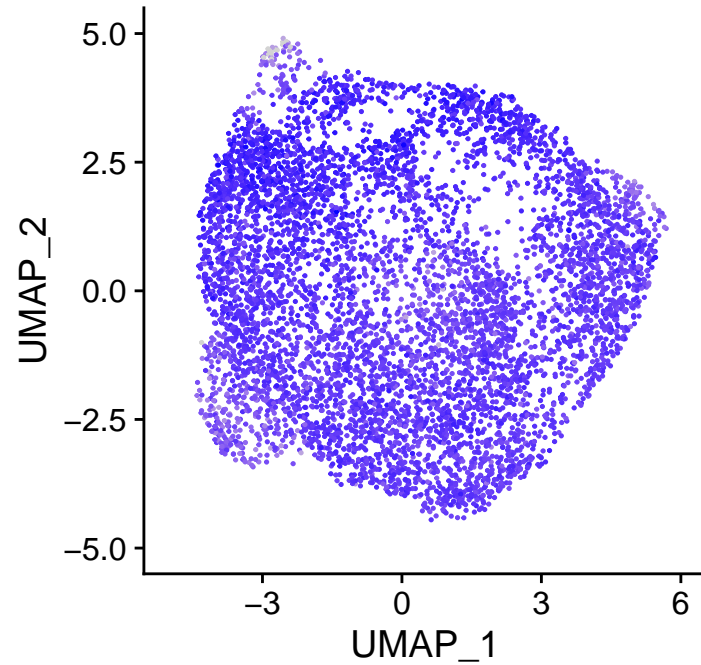**VPS28**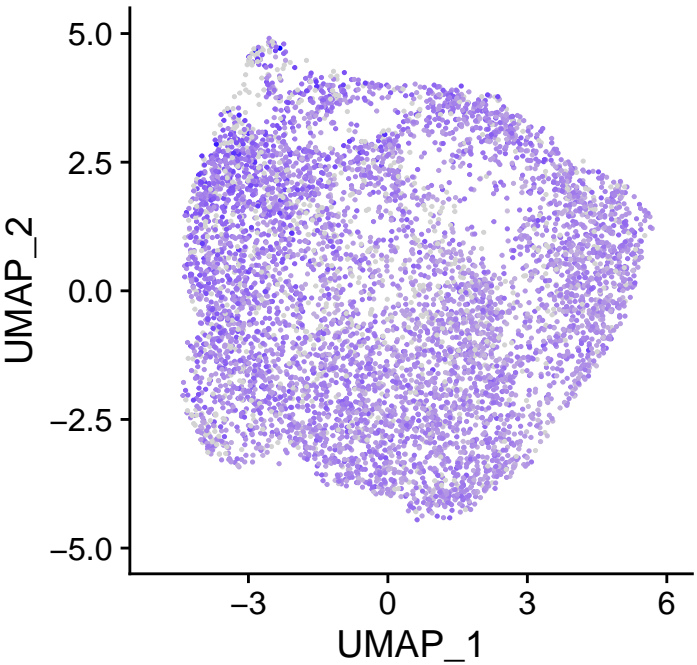**MT-CO1**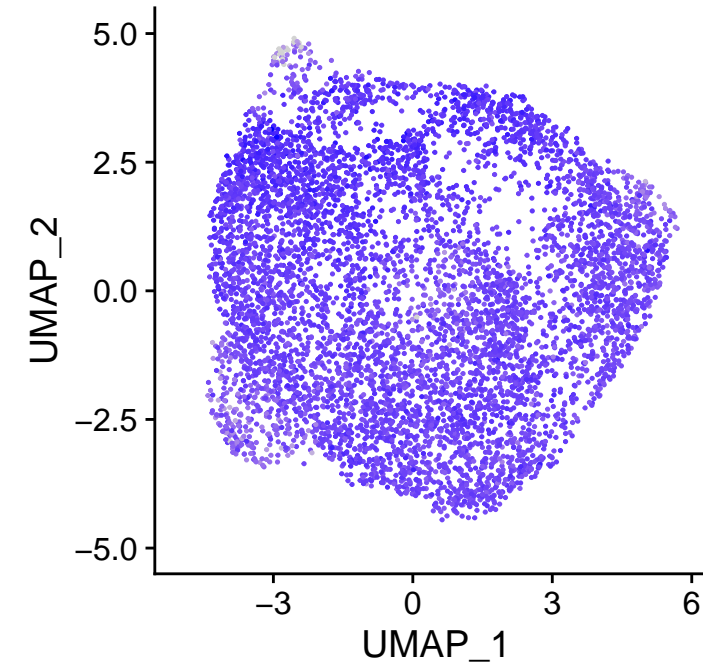**MT-CO2**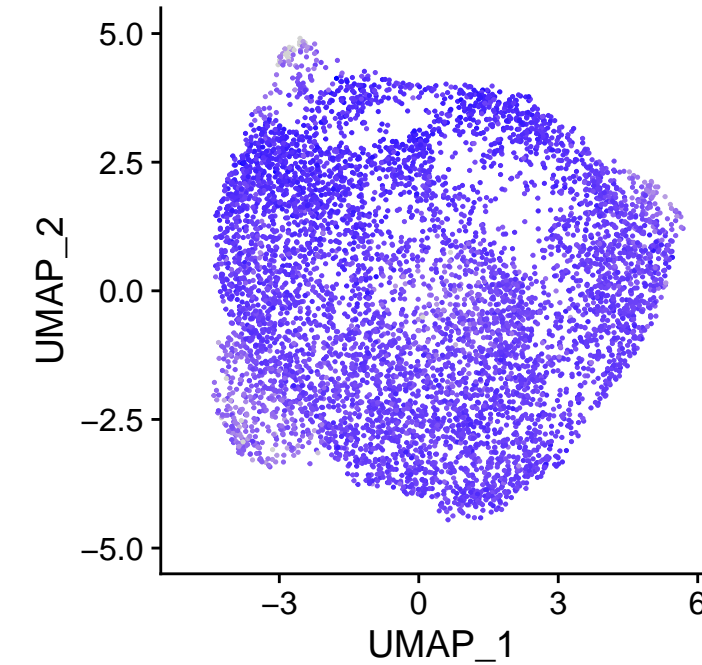**MT-ATP6**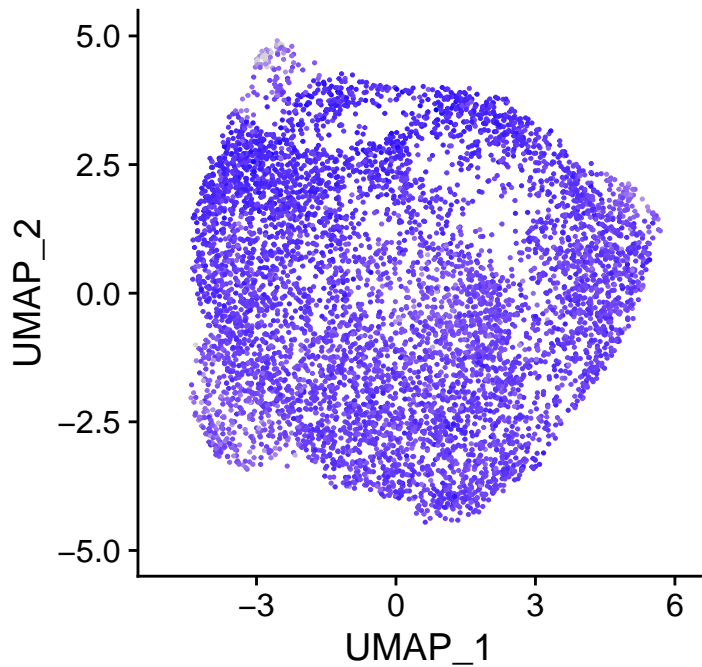**ENSCAFG00000022709**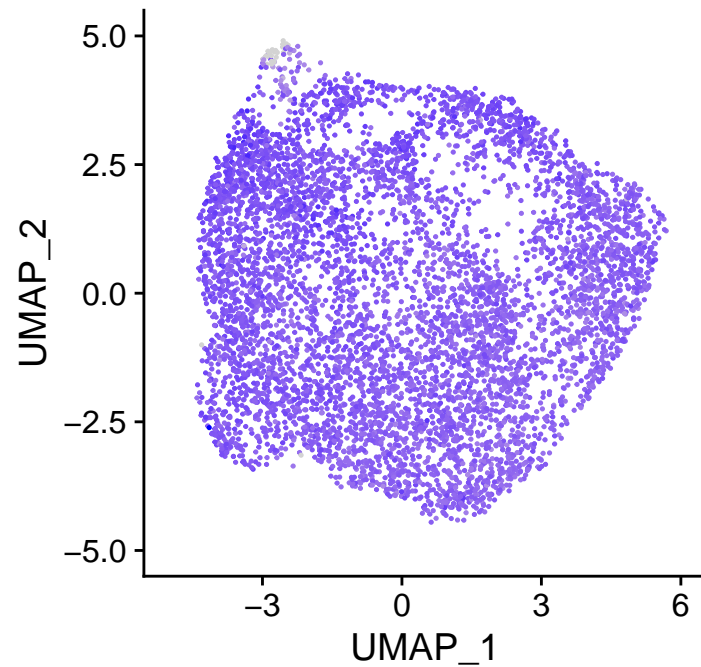**FOS**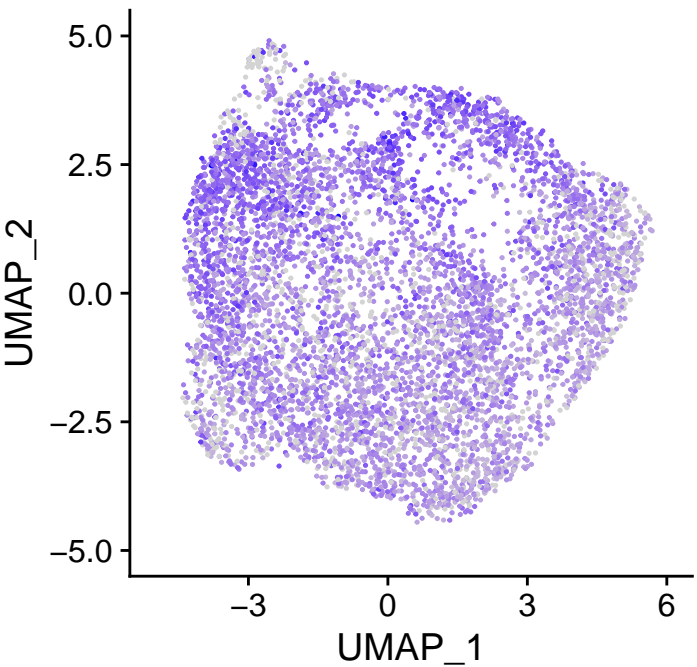**KLF6**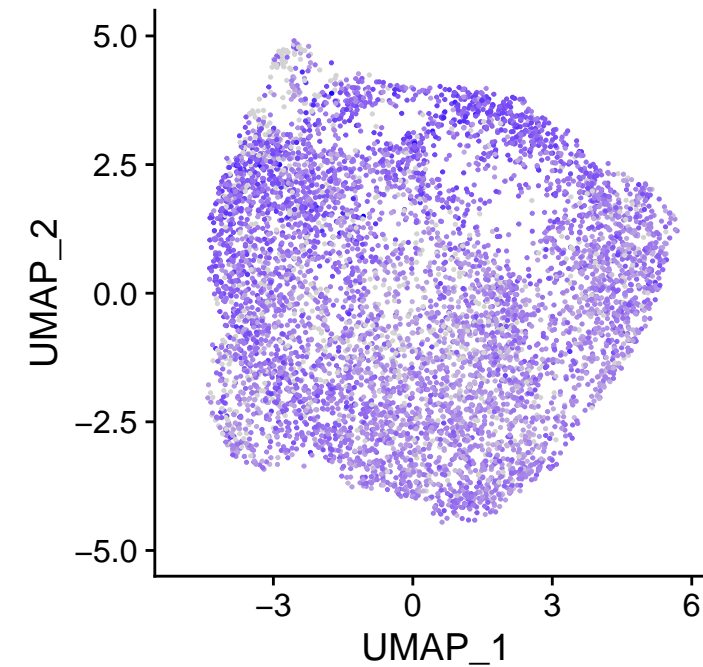**MT-CYB**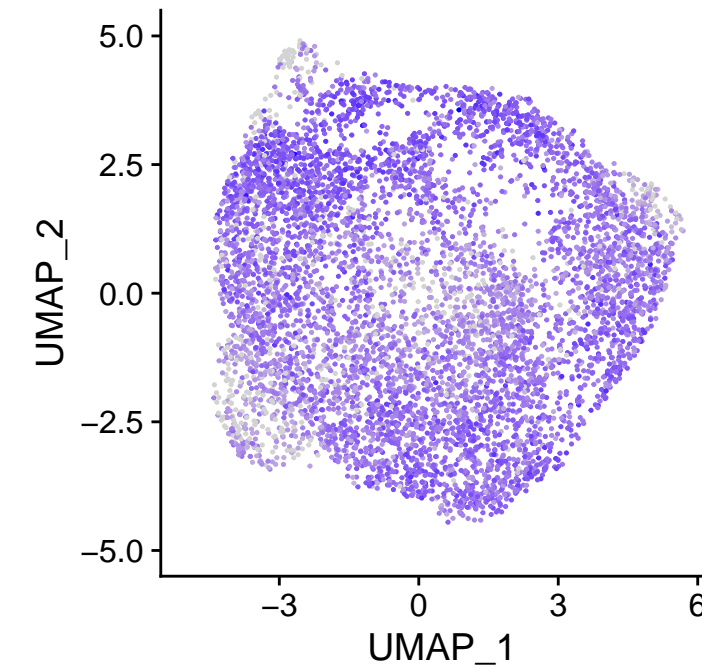



**ASPM**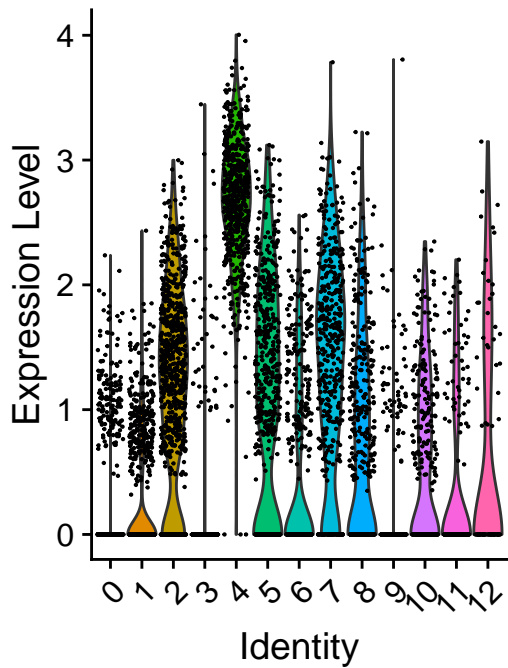**CENPF**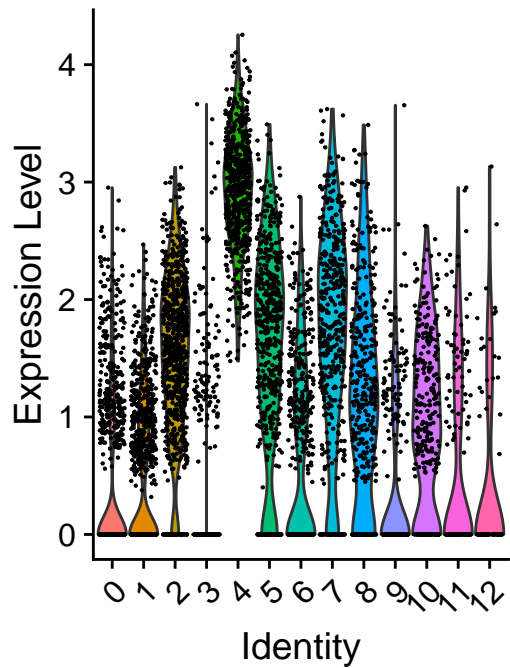**TOP2A**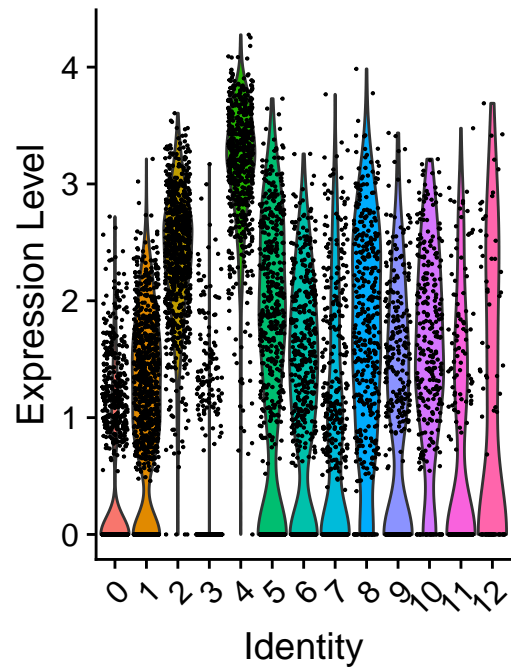**UBE2C**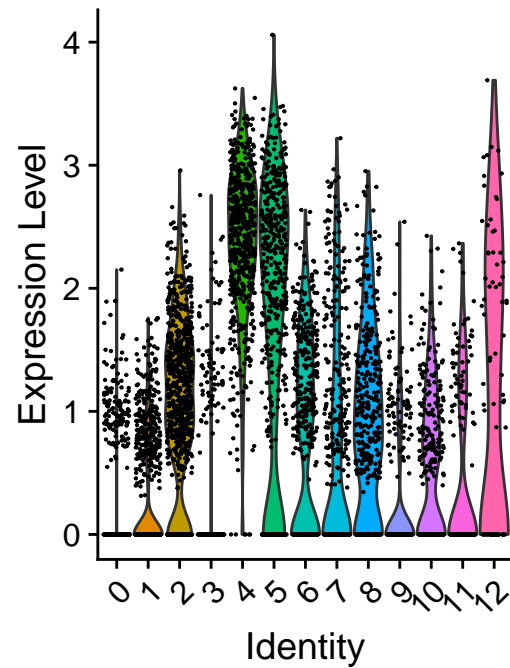**CENPE**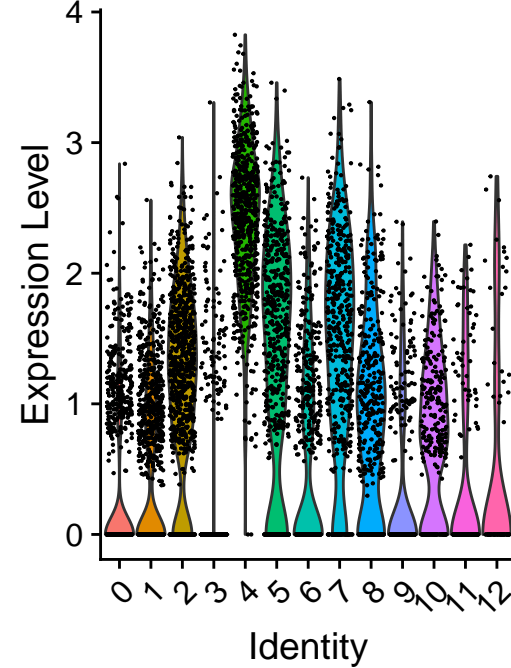**SMG1**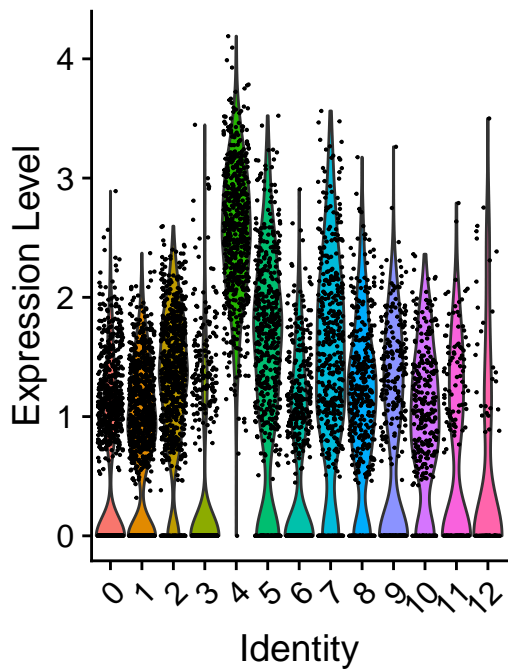**PLK1**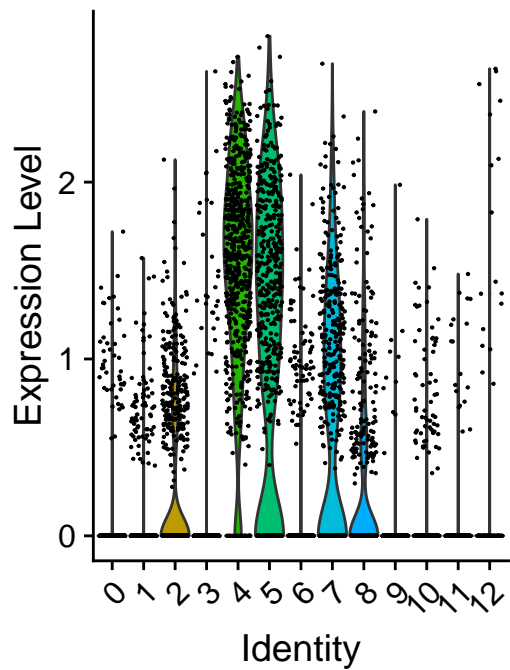**BUB1B**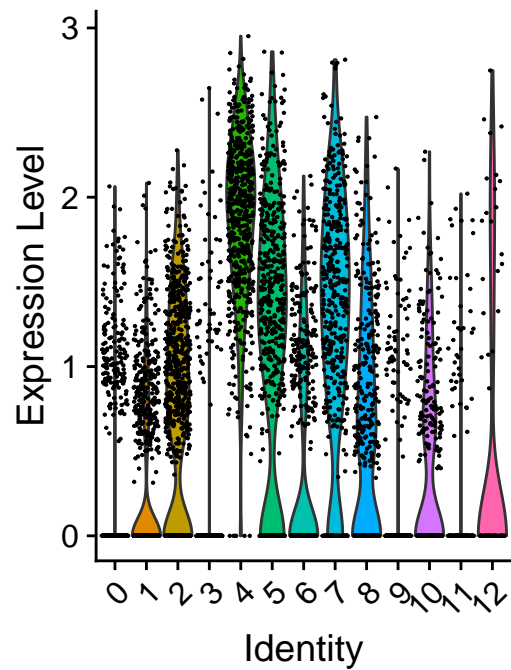**MKI67**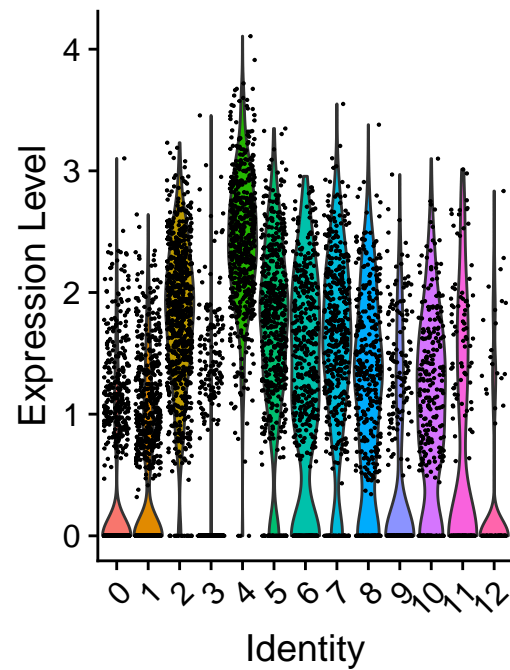**ENSCAFG0000007705**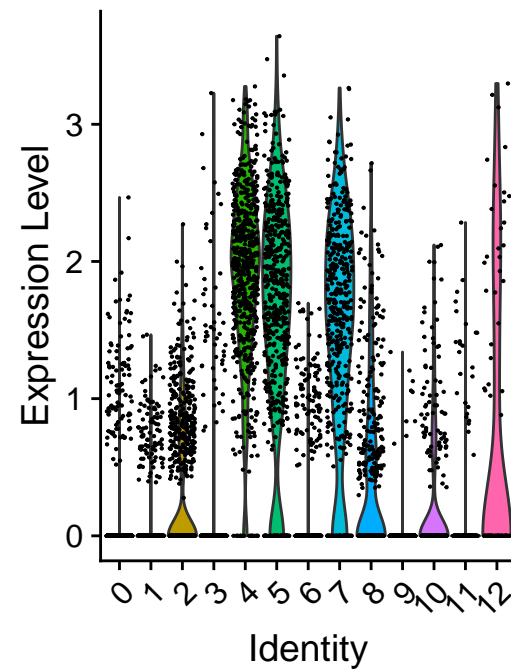





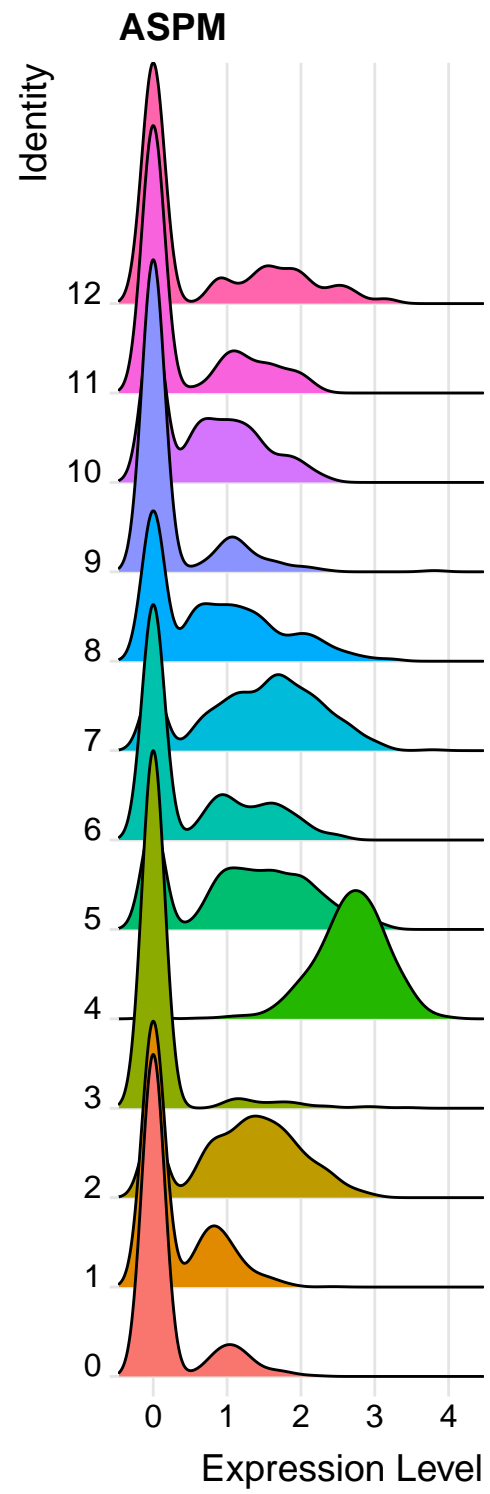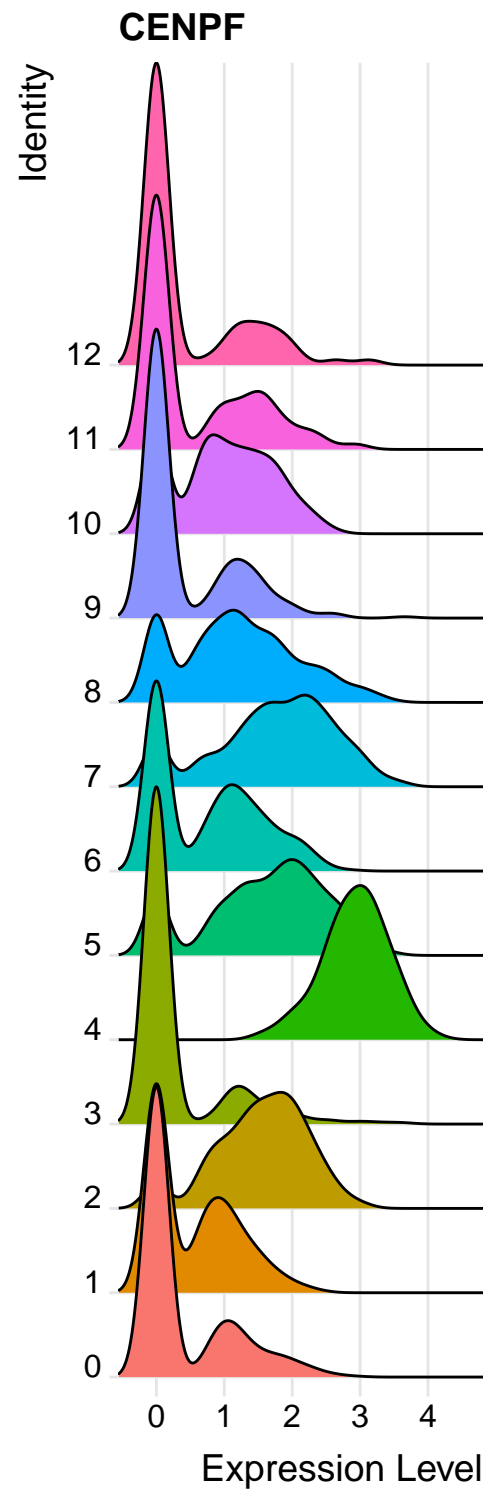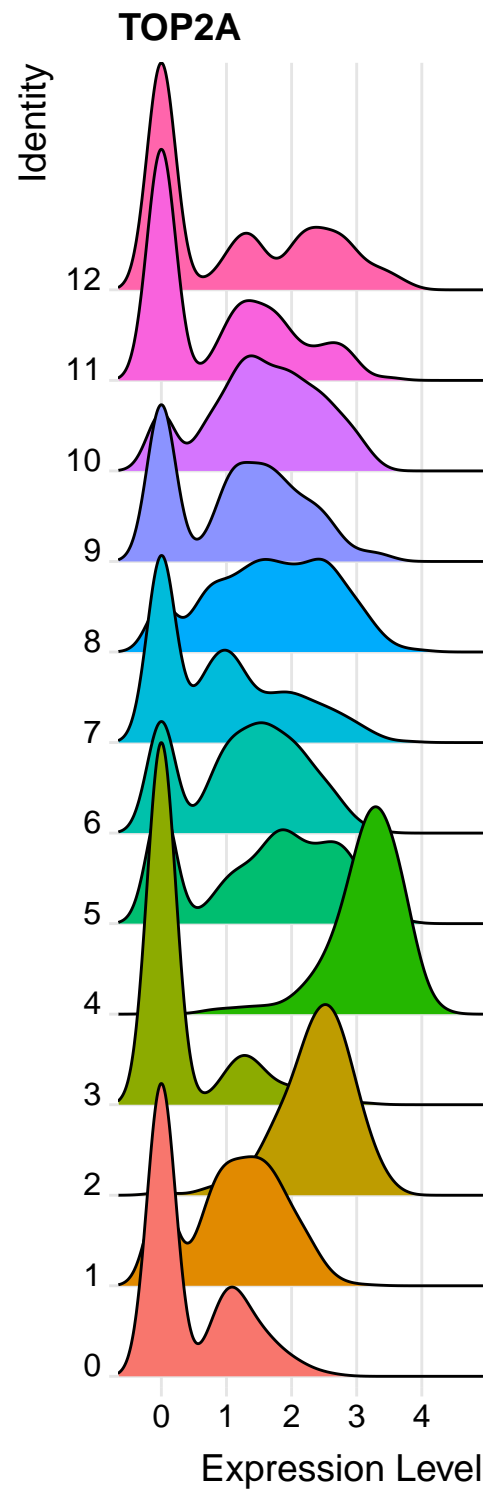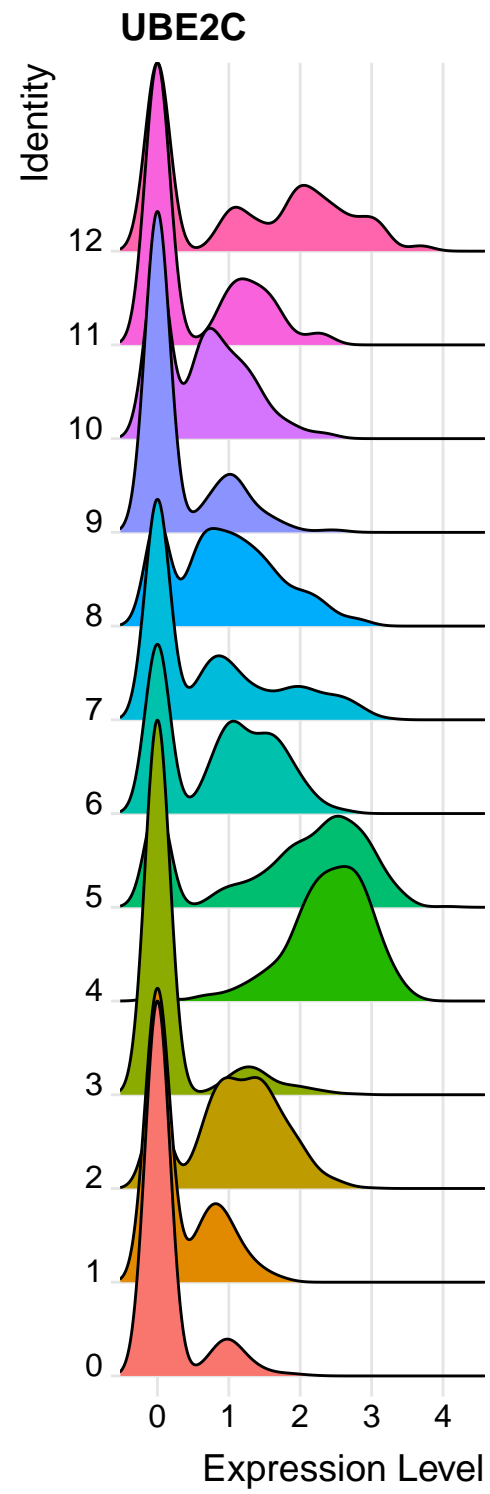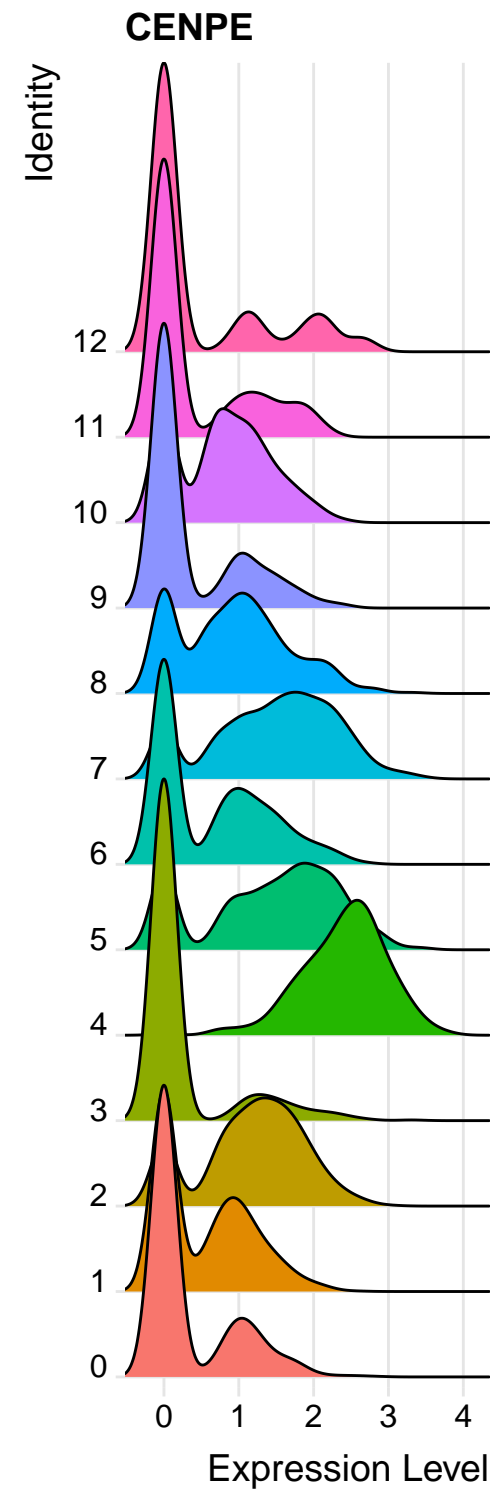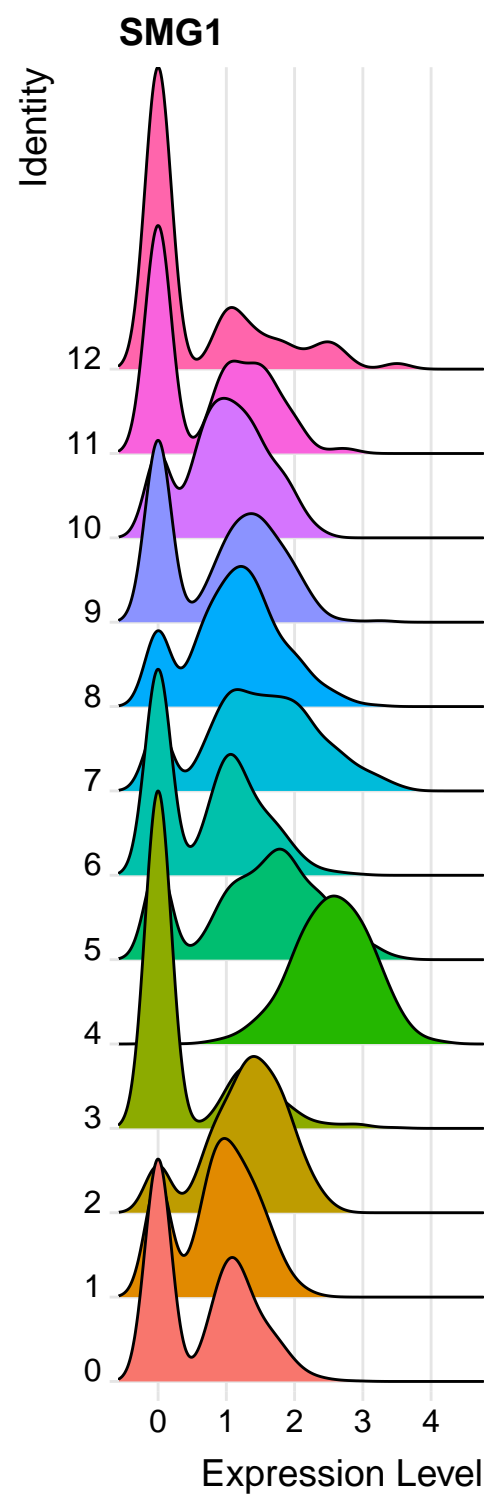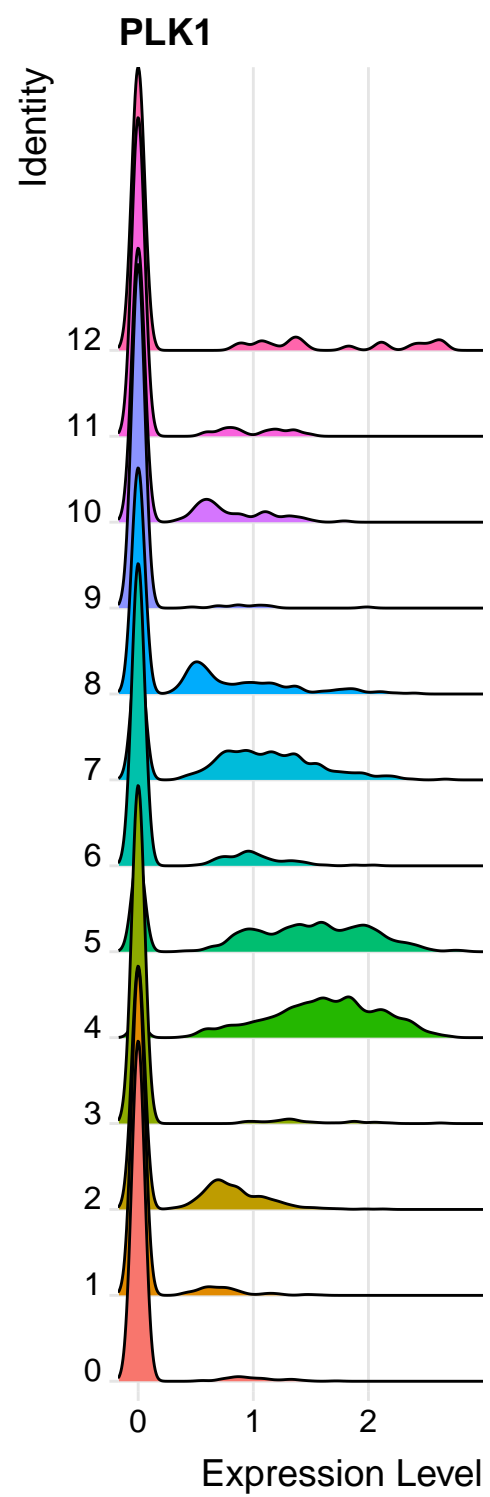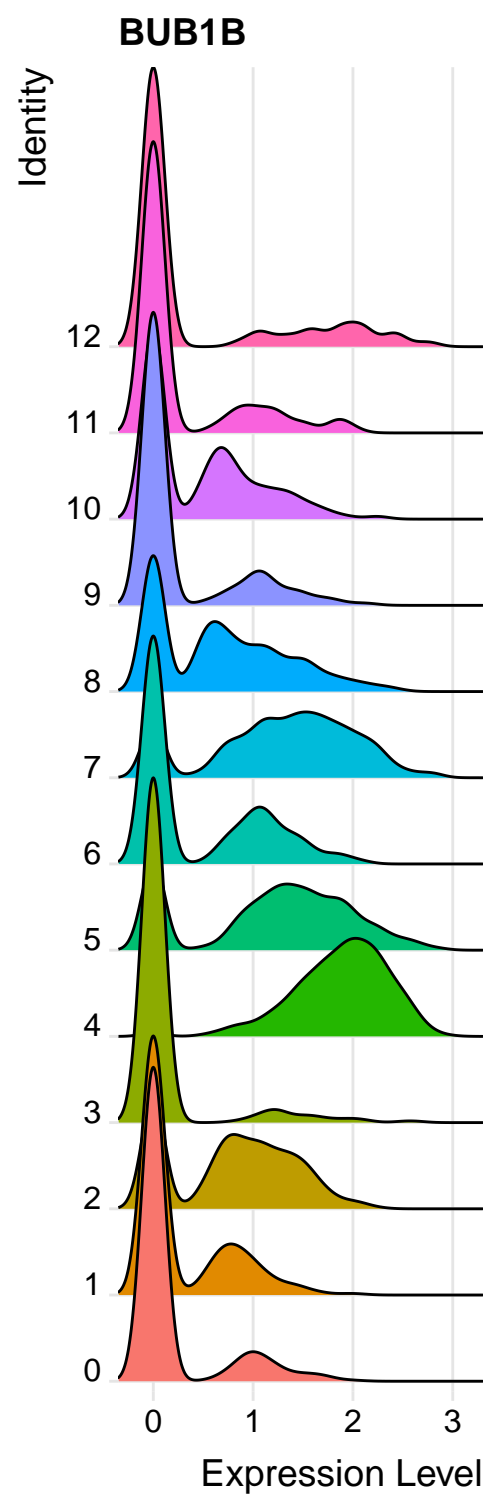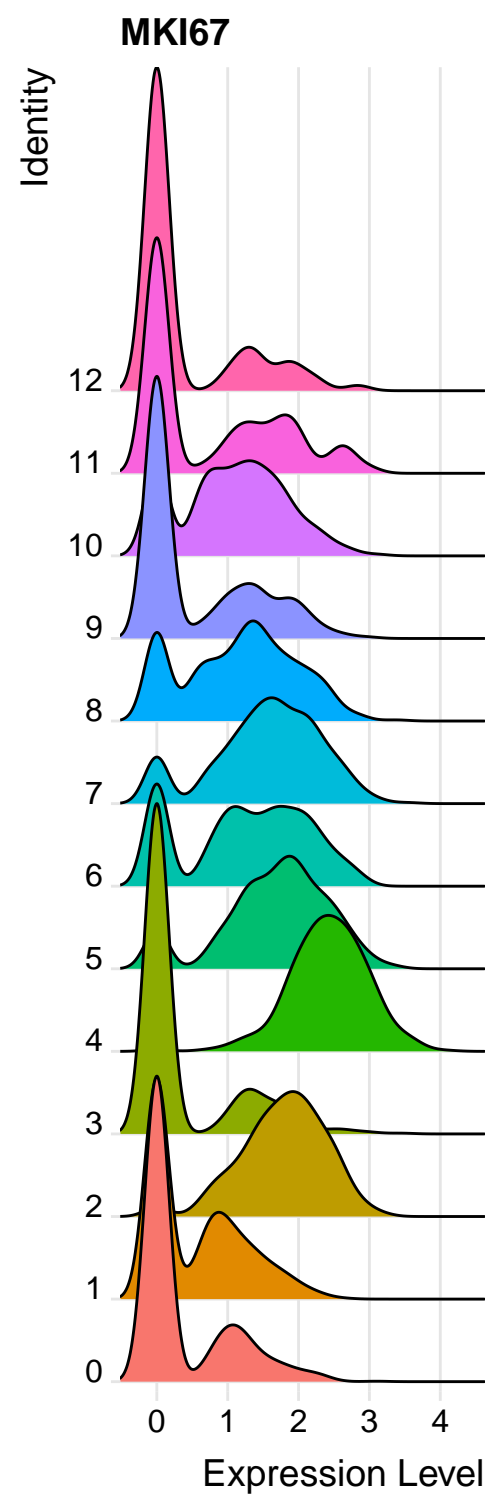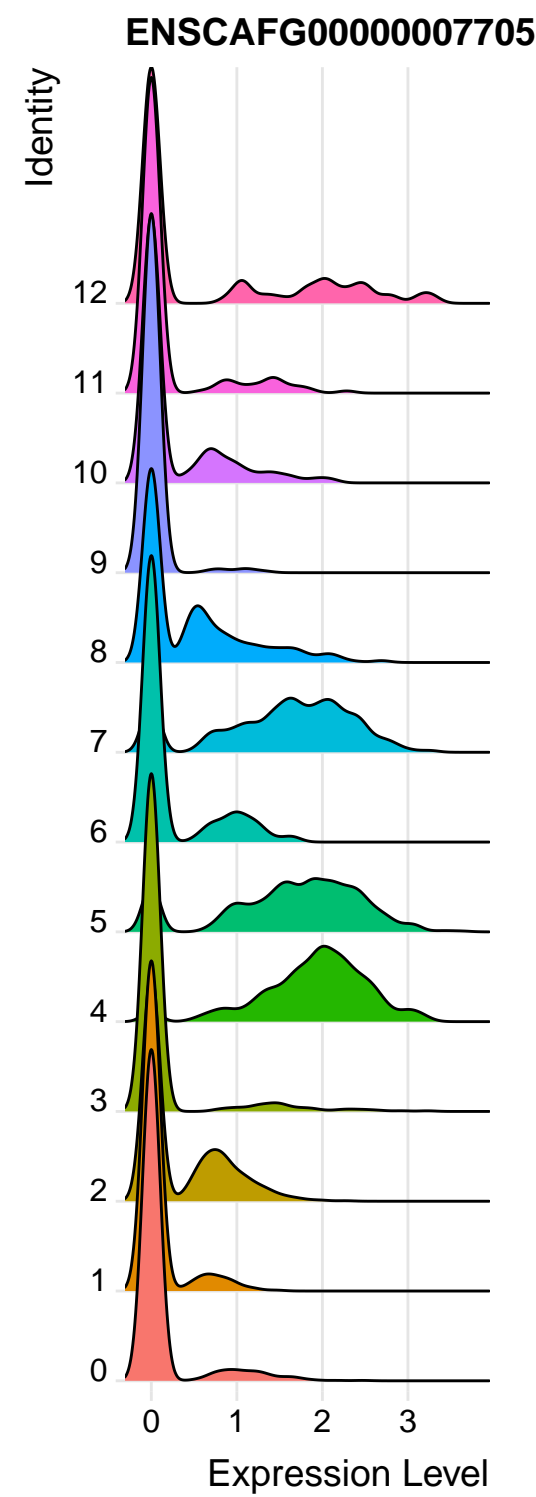

**ASPM**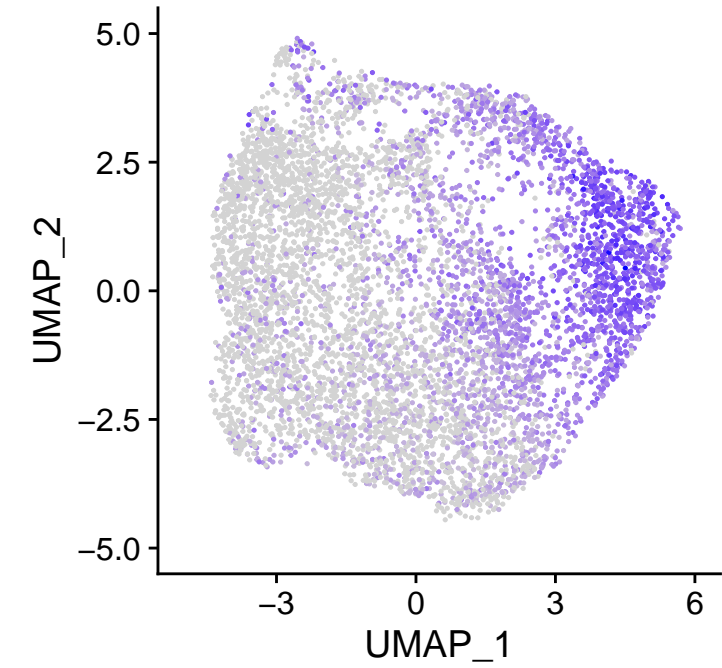**CENPF**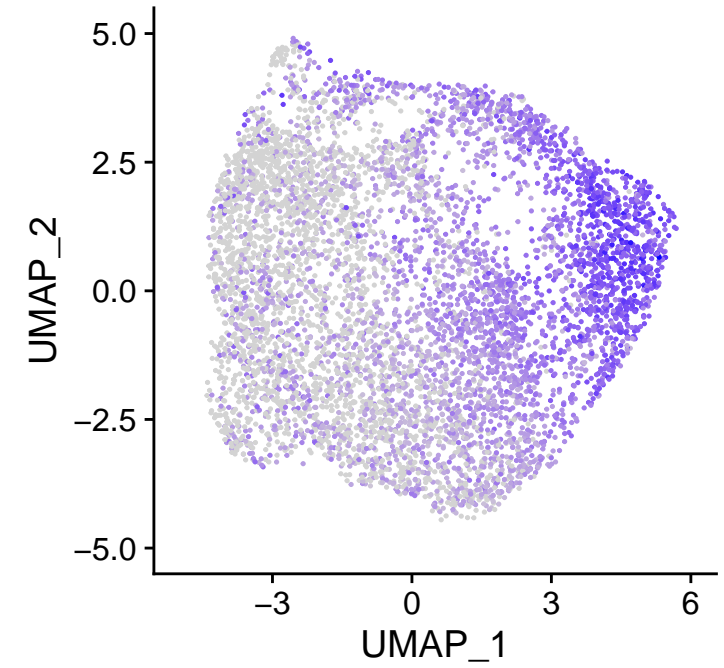**TOP2A**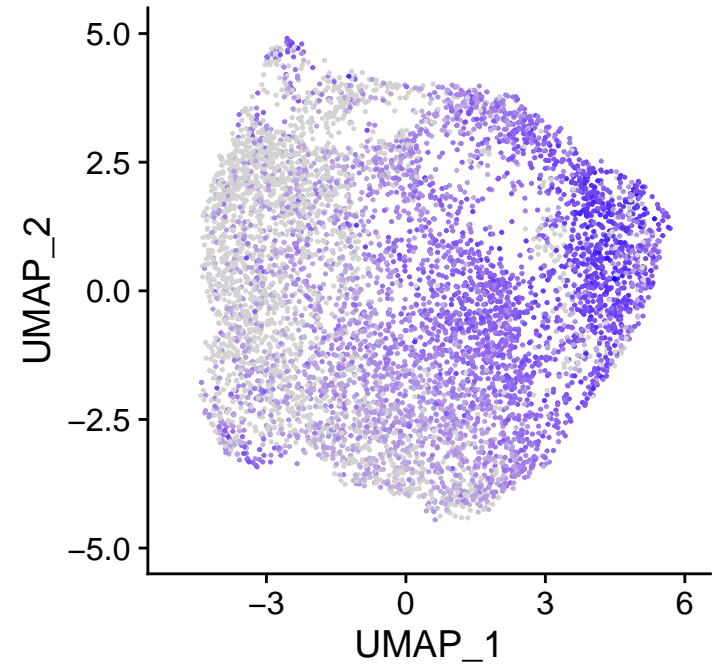**UBE2C**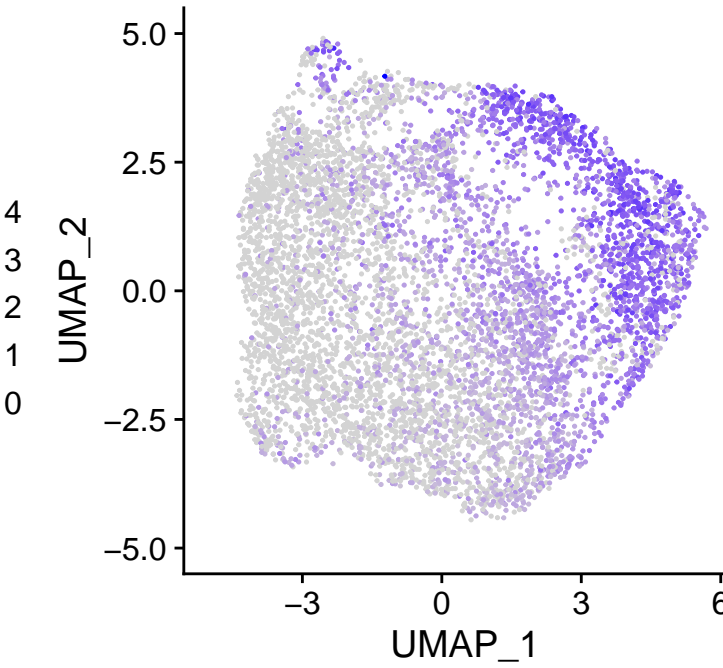**CENPE**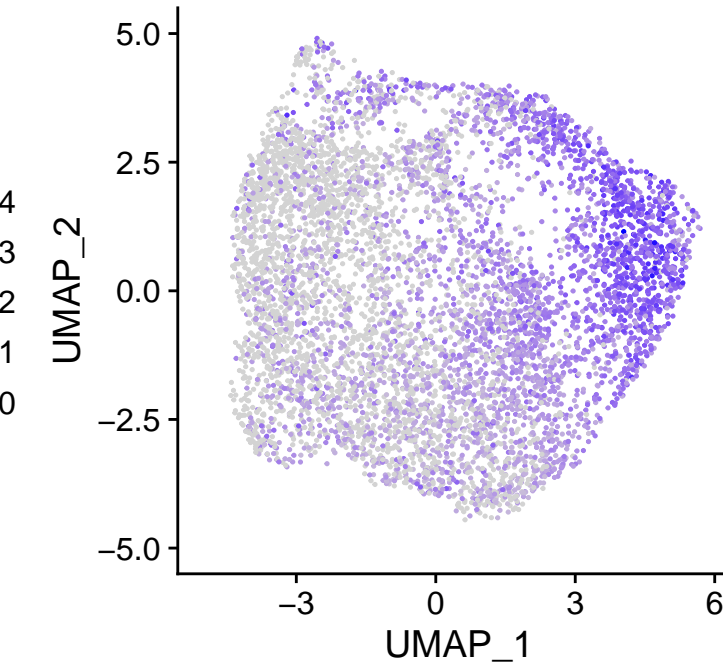**SMG1**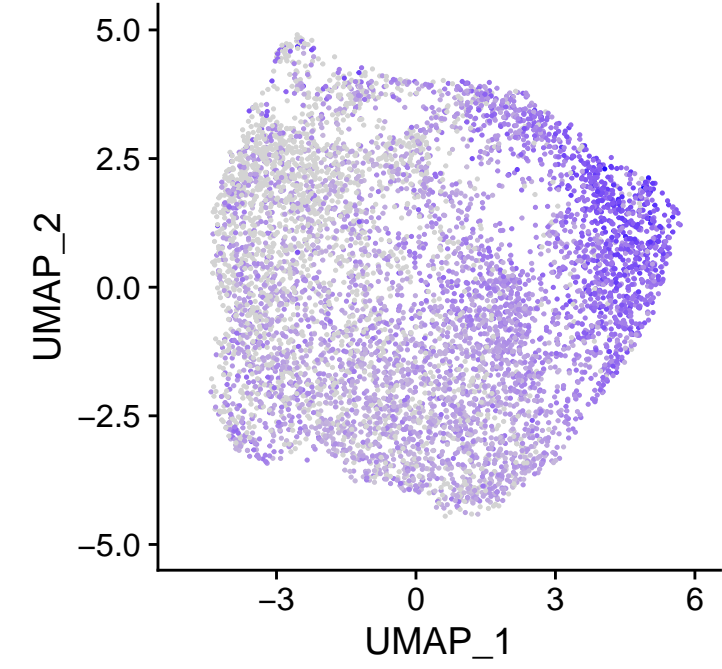**PLK1**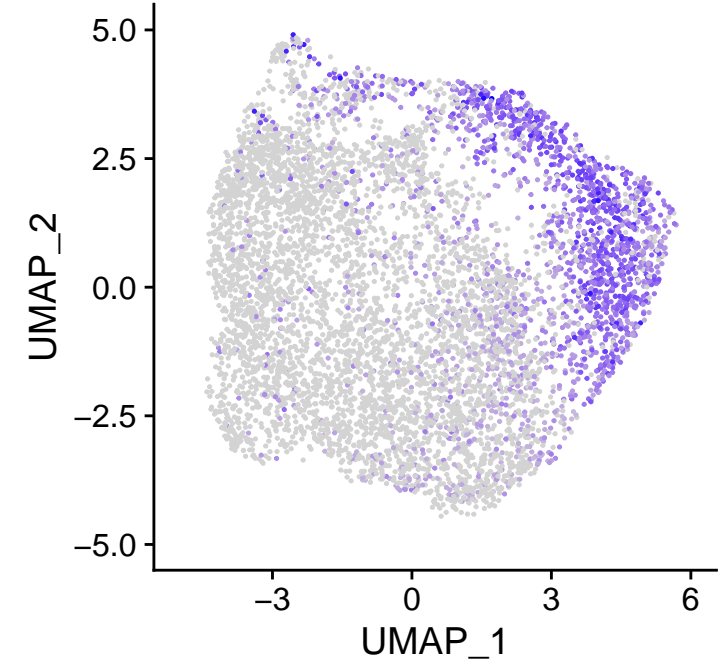**BUB1B**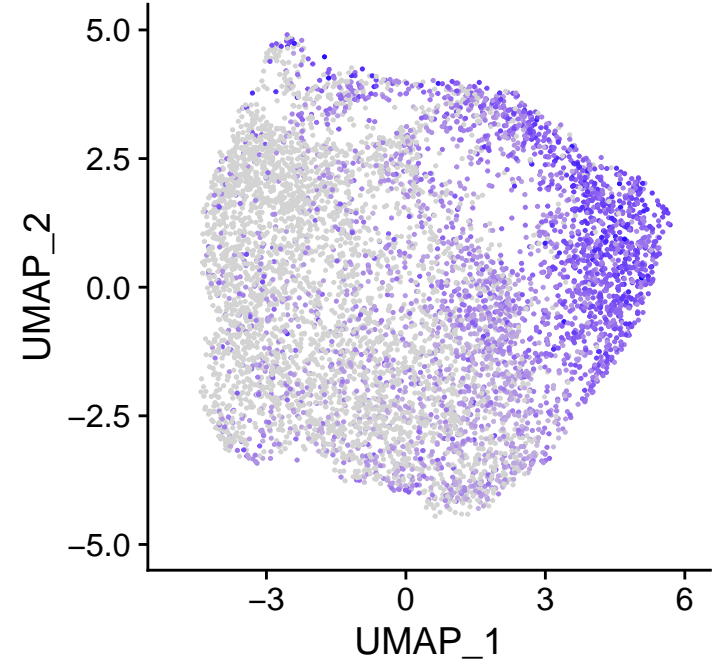**MKI67**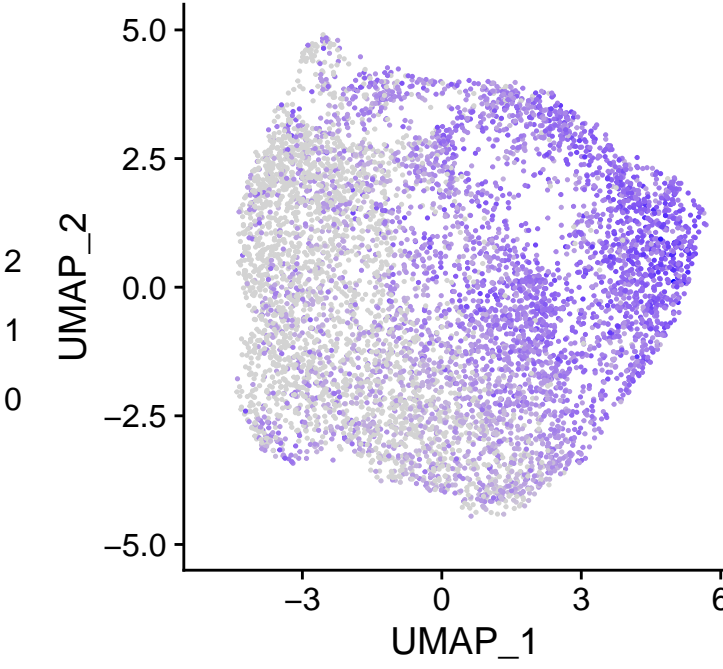**ENSCAFG00000007705**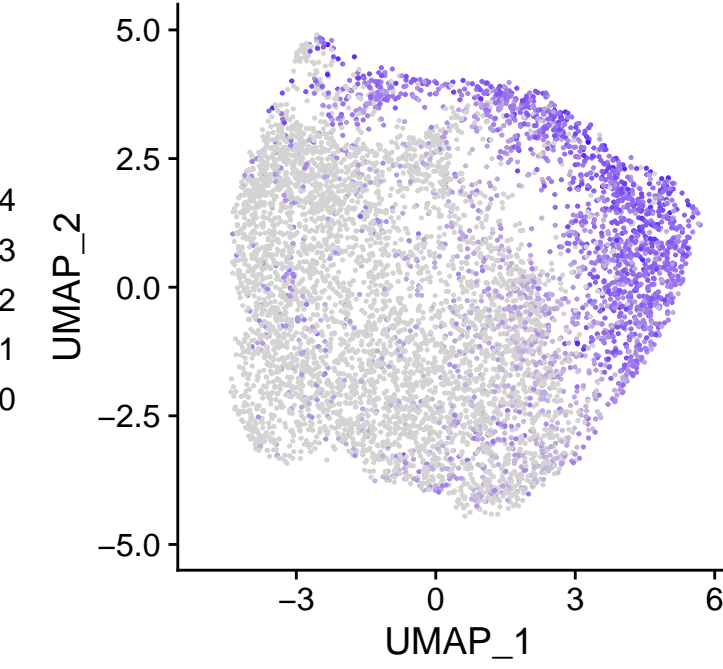



**CDC20**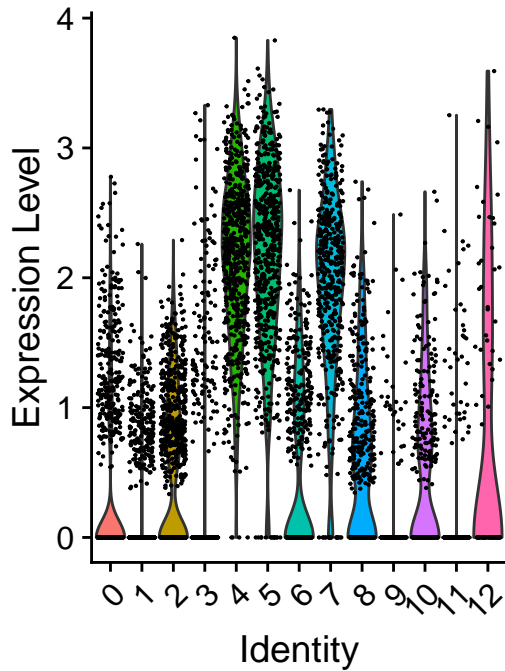**UBE2S**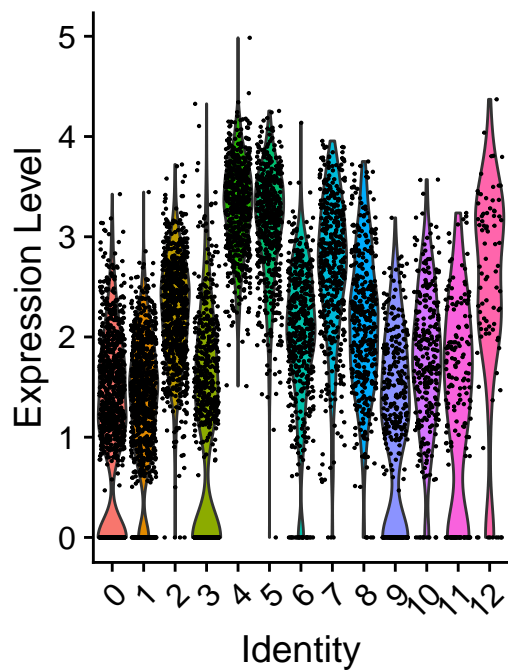**ENSCAFG00000017264**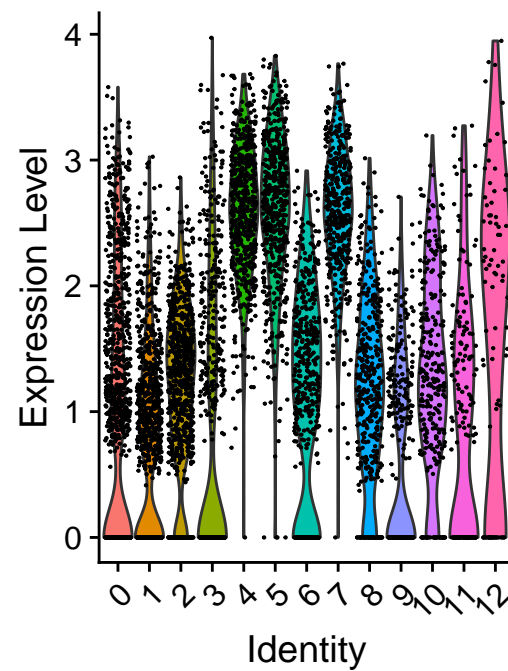**ENSCAFG00000007705**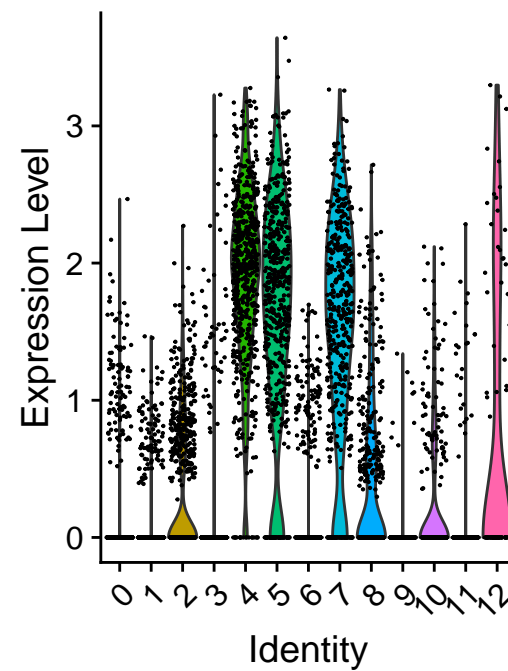**JPT1**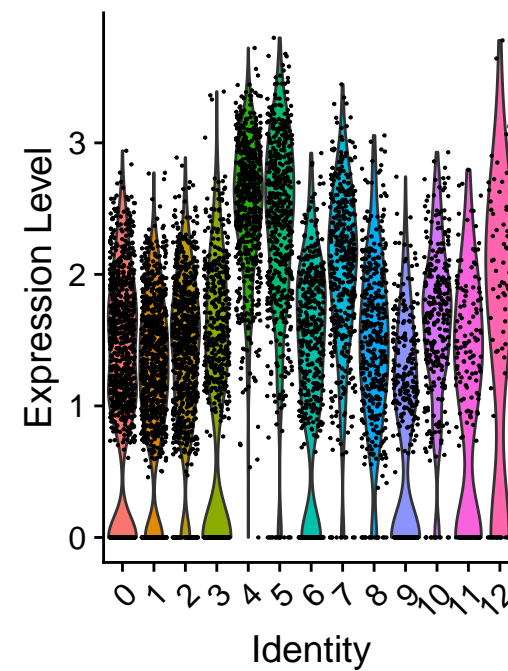**SECISBP2**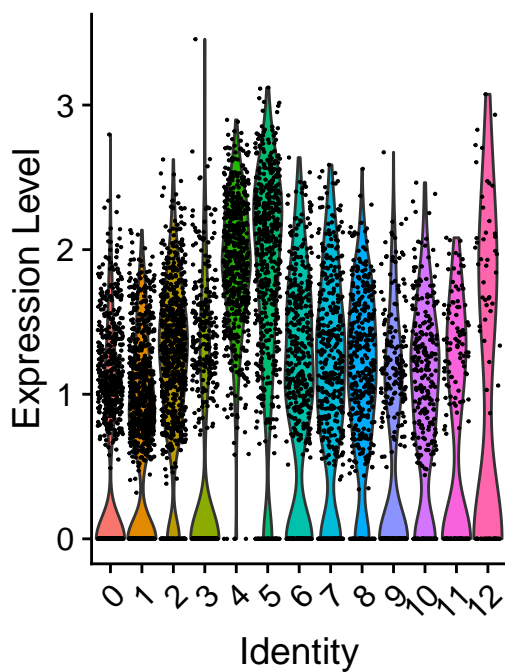**UBE2C**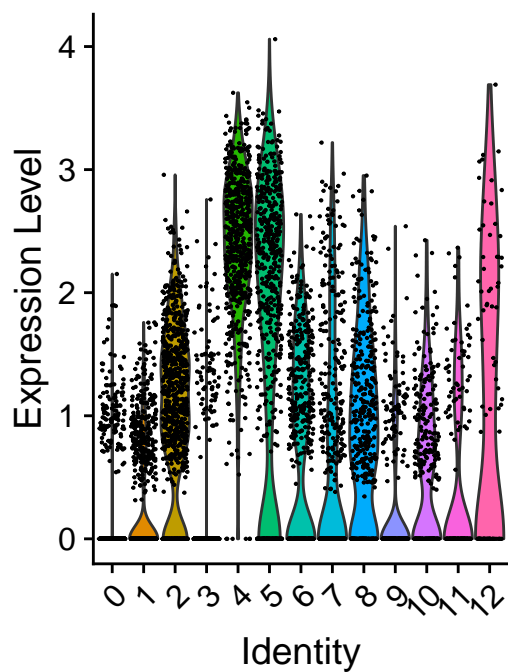**PLK1**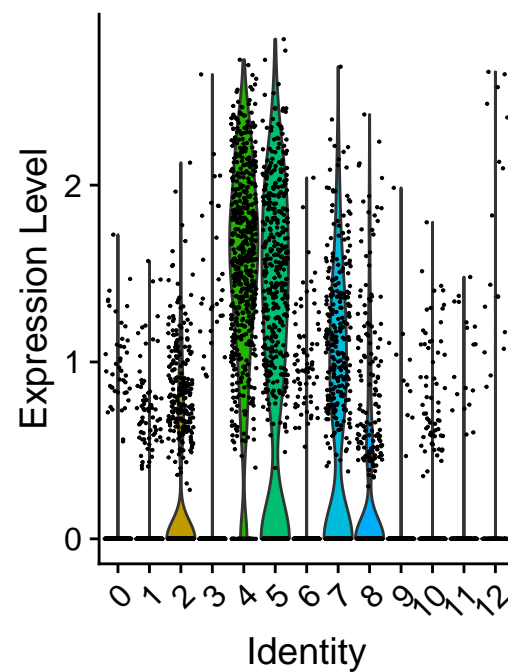**CDCA3**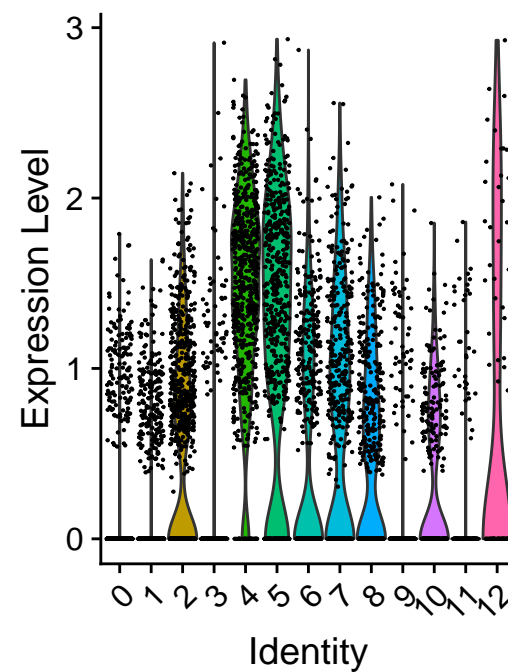**ENSCAFG00000008661**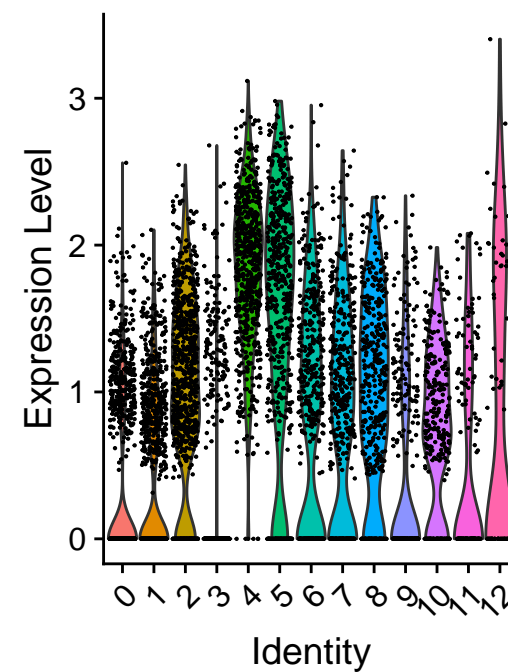



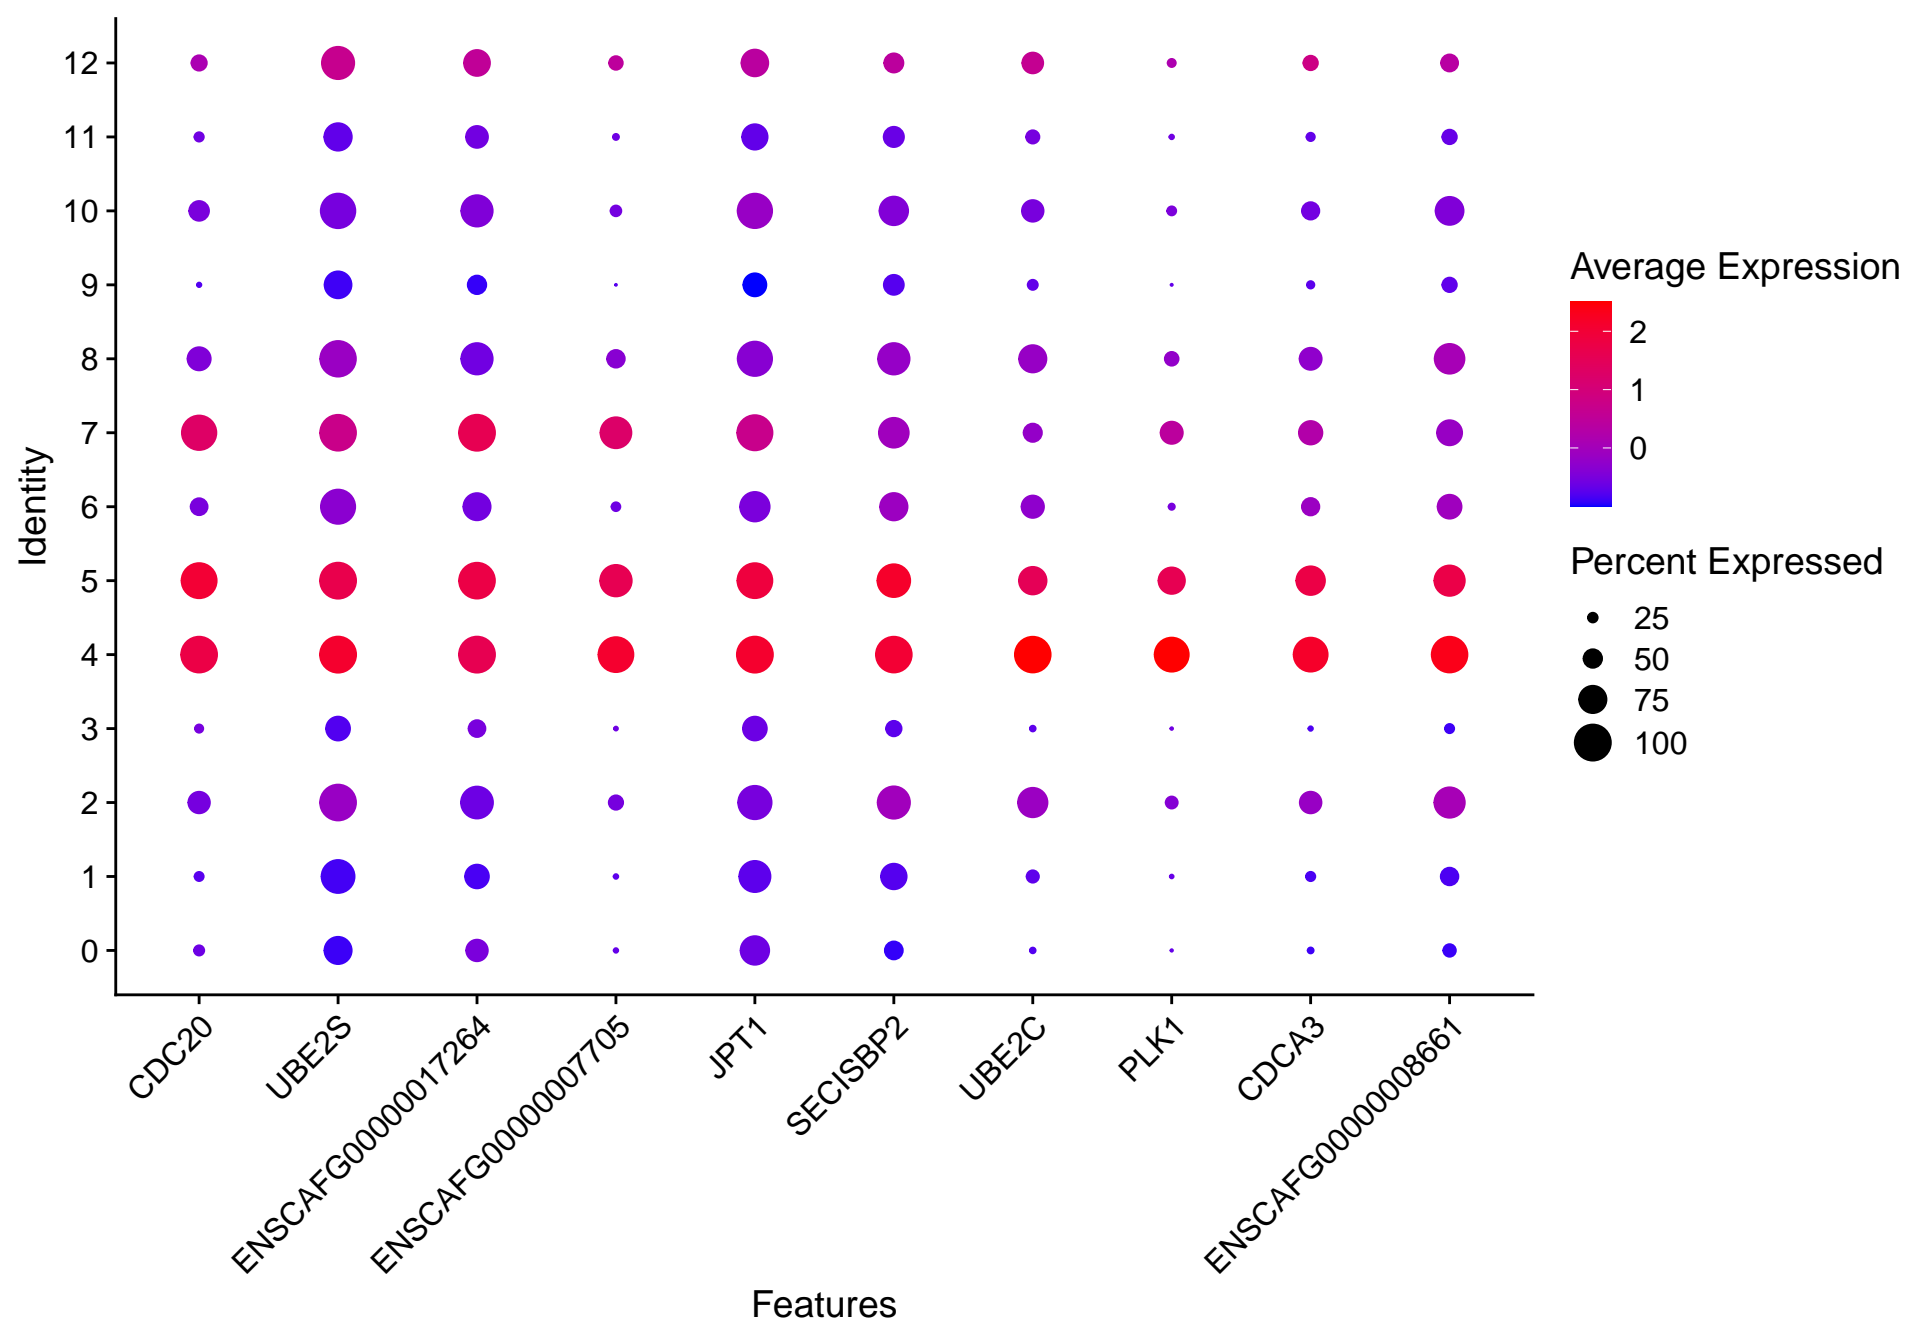

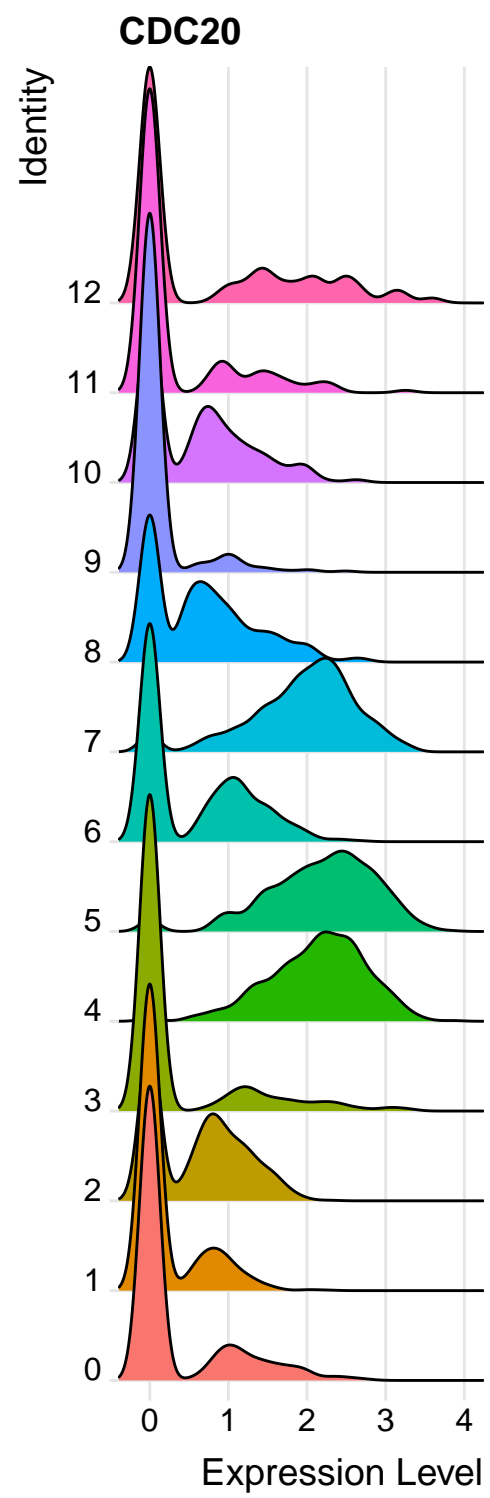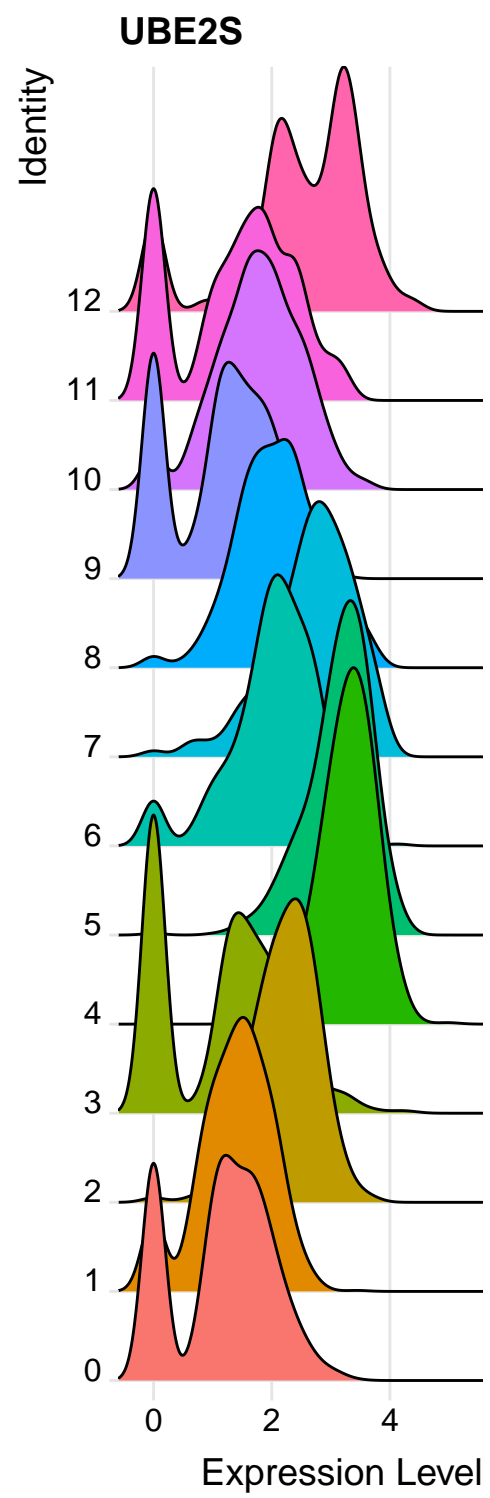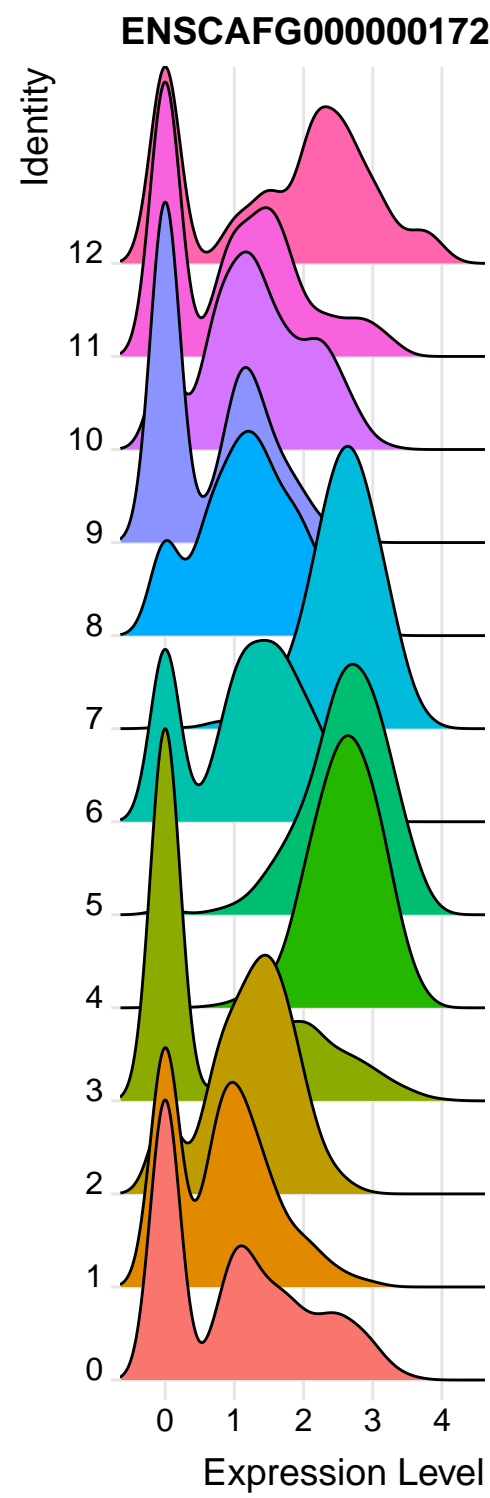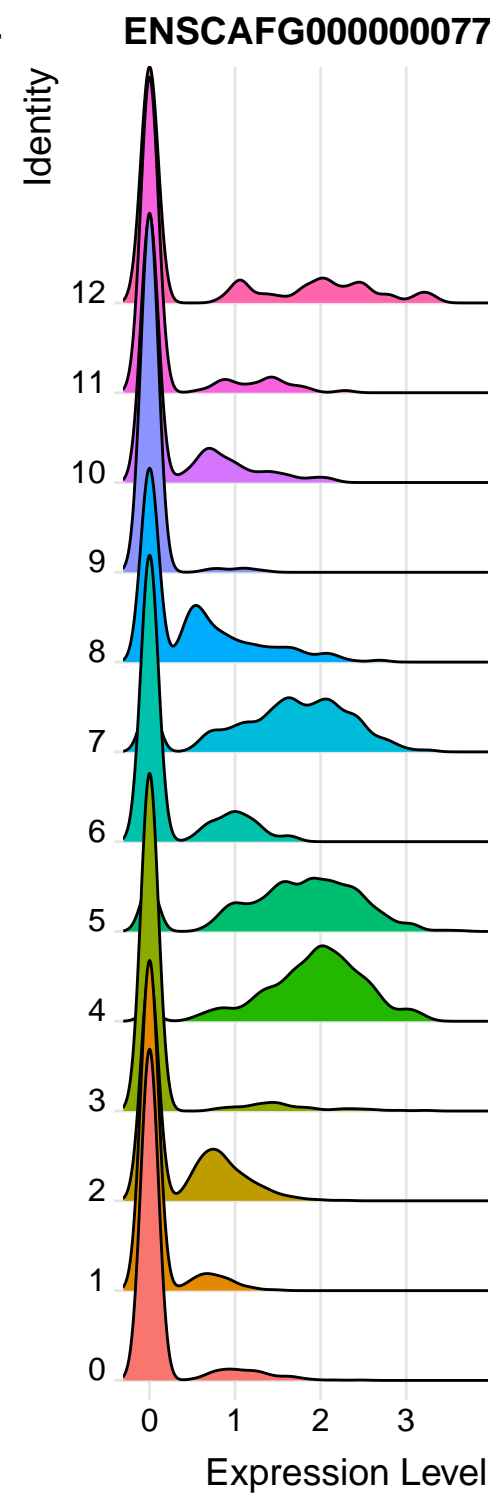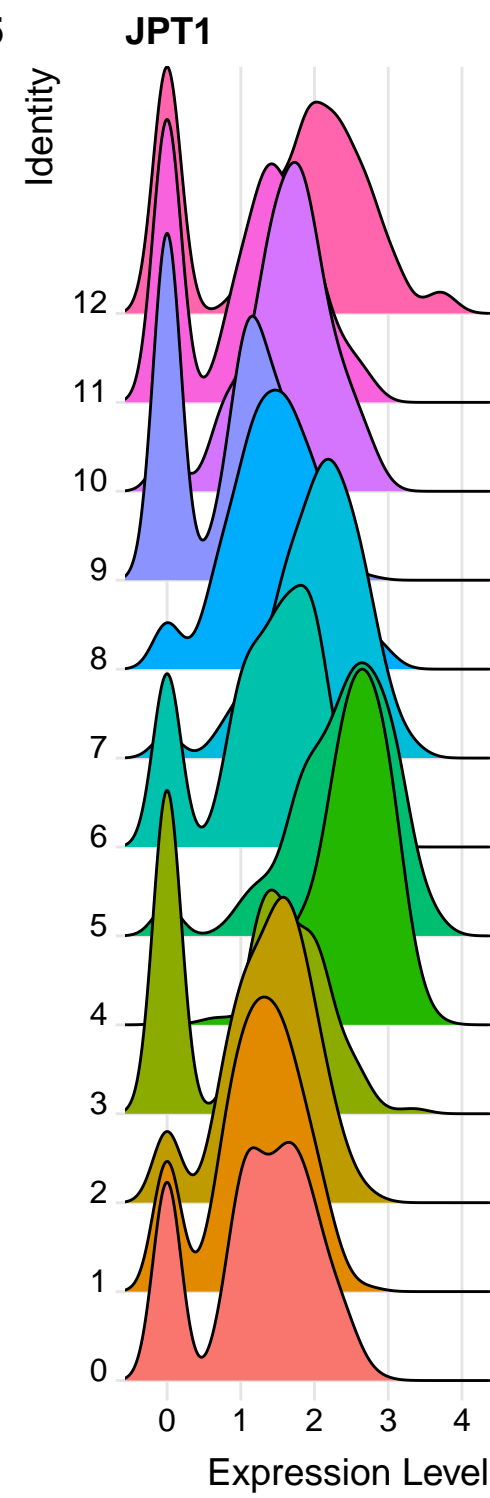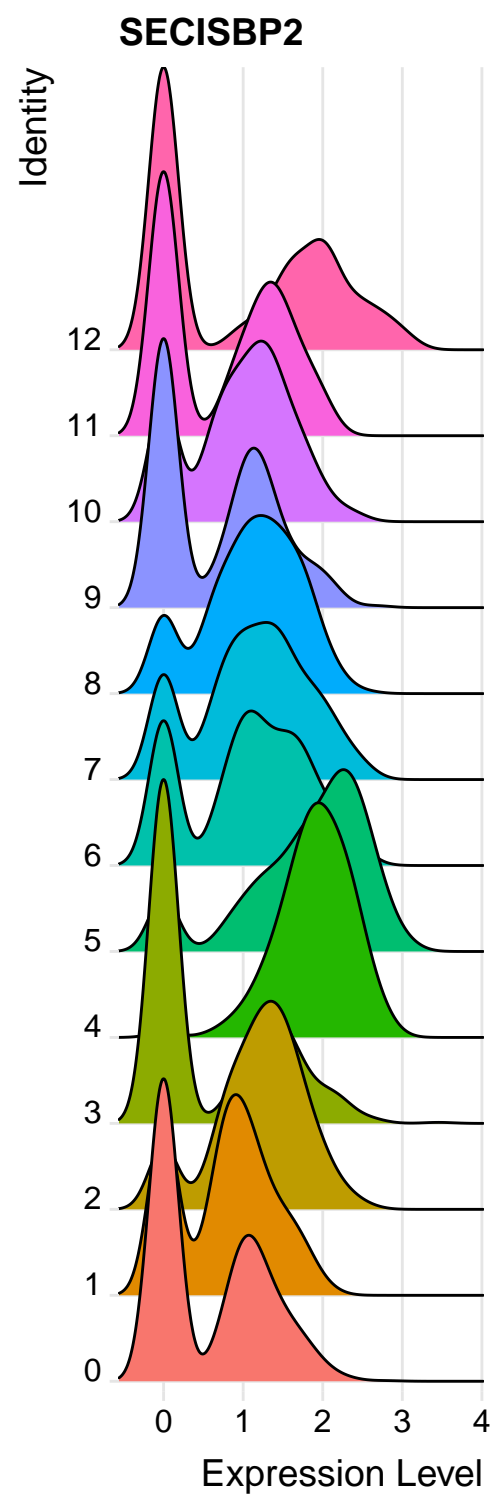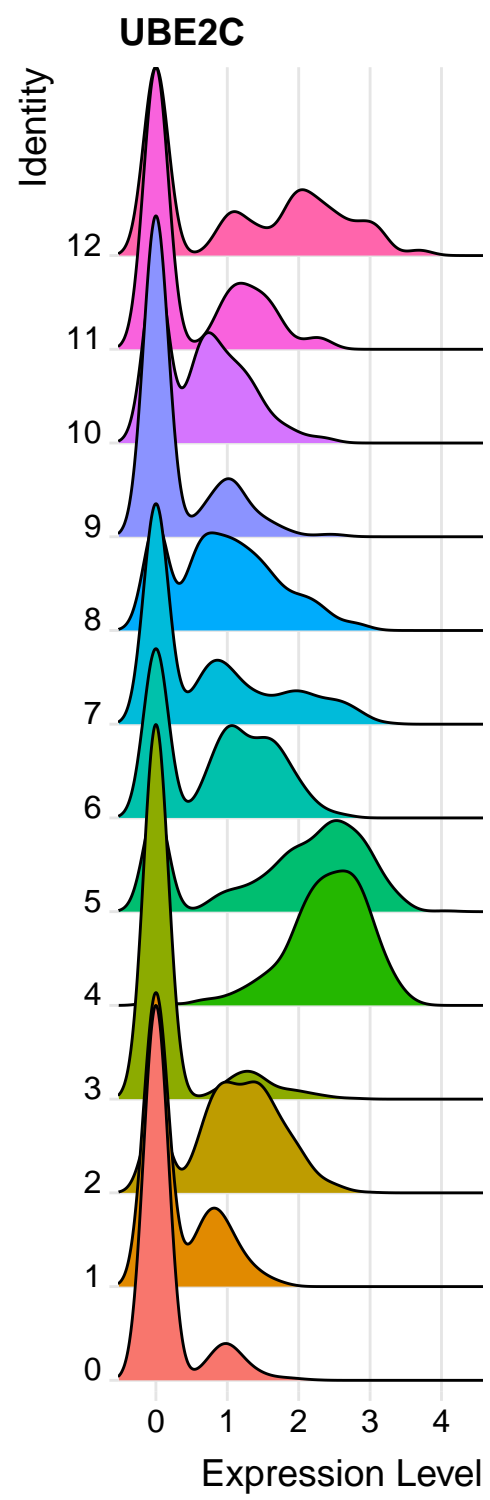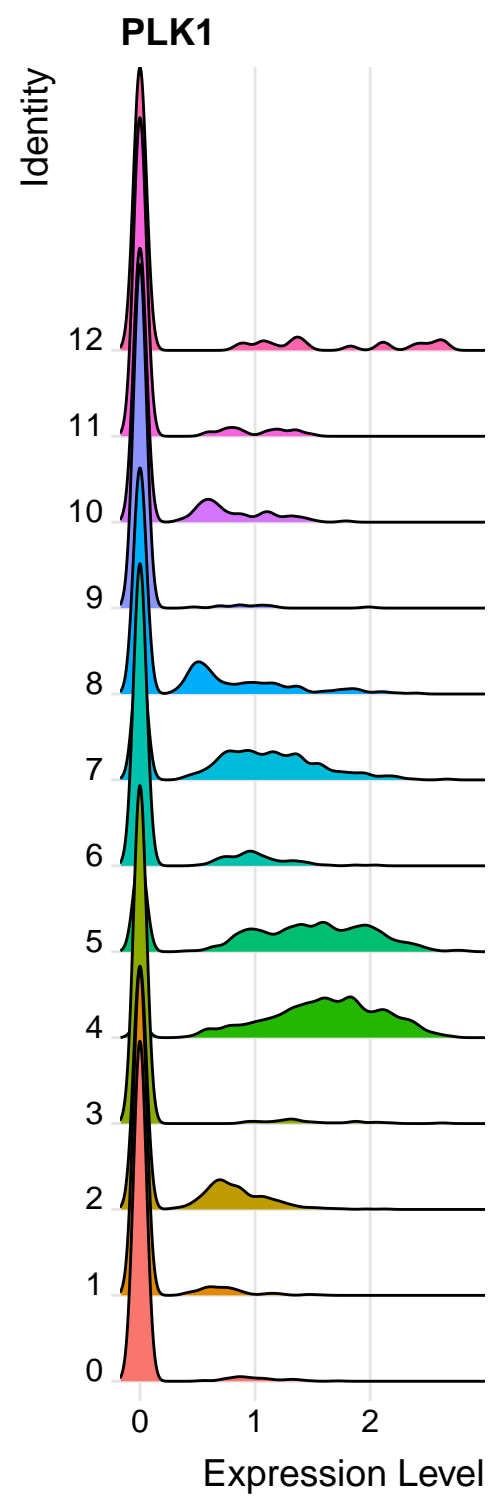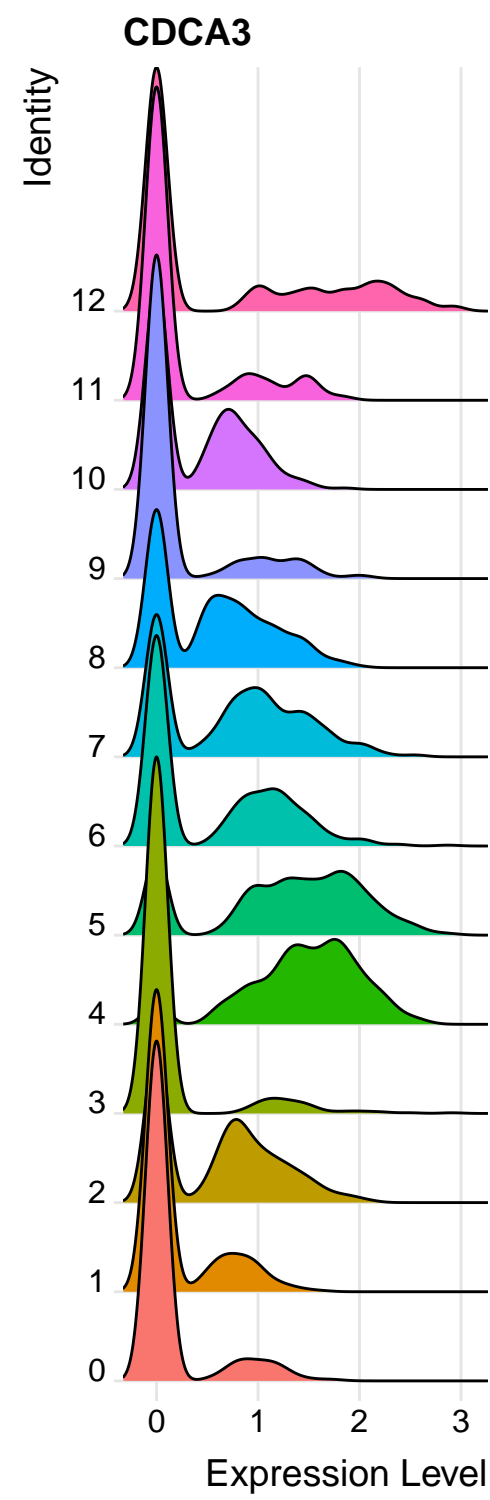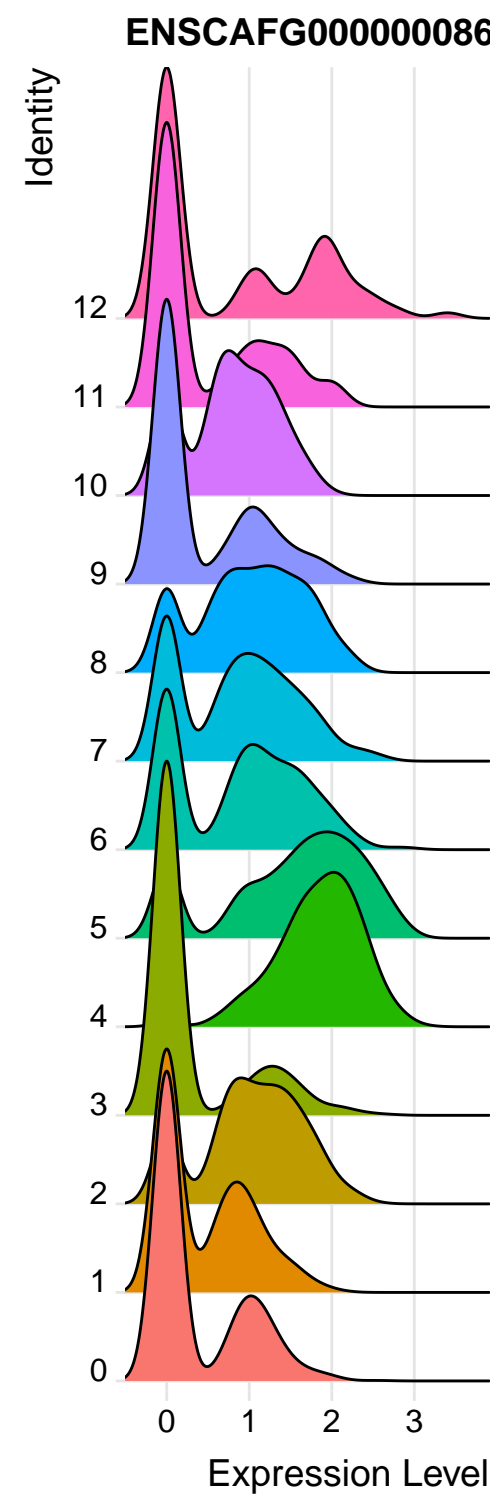

**CDC20**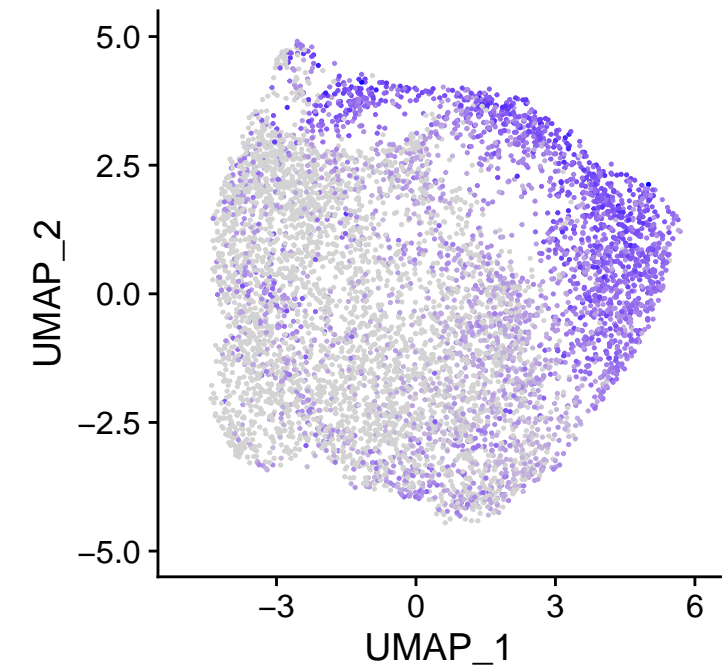**UBE2S**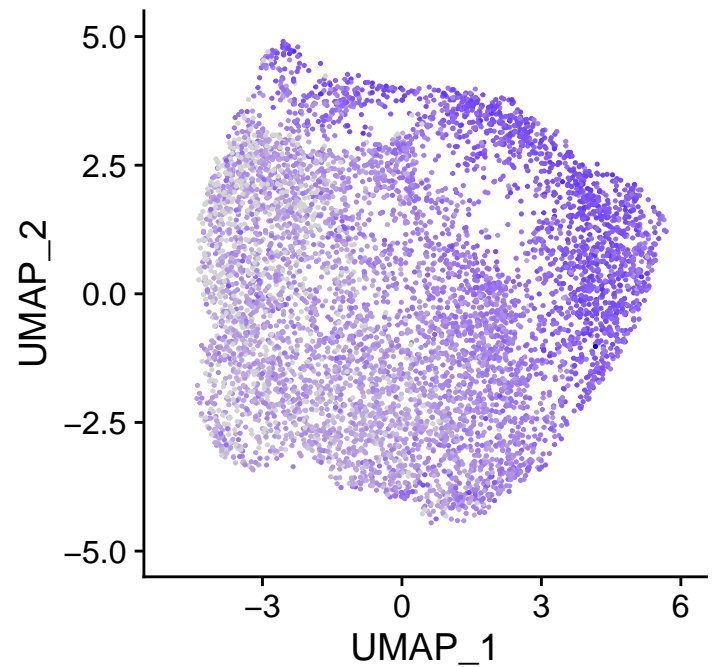**ENSCAFG00000017264**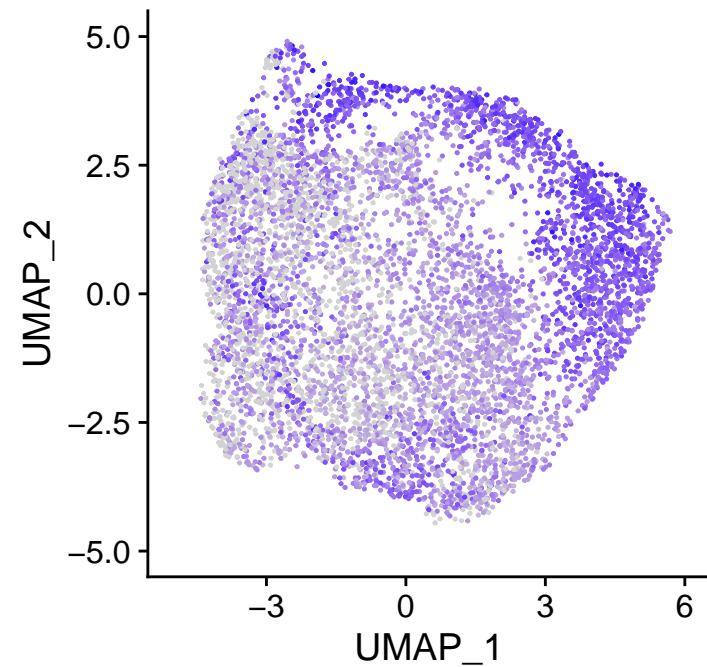**ENSCAFG00000007705**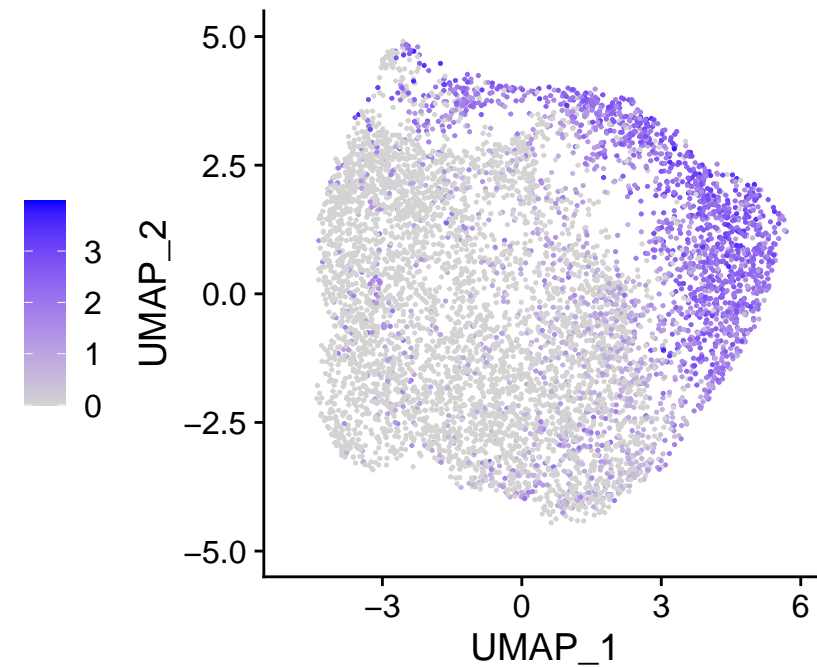**JPT1**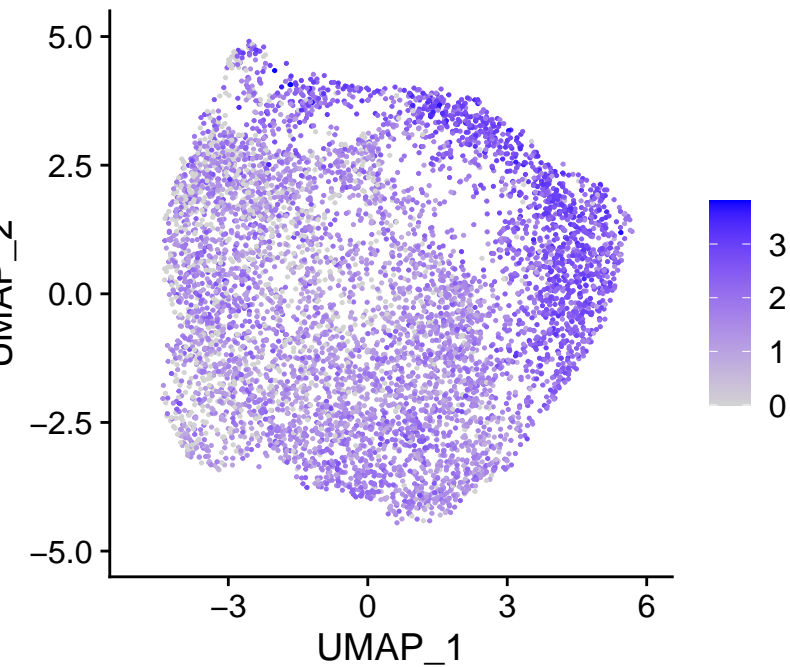**SECISBP2**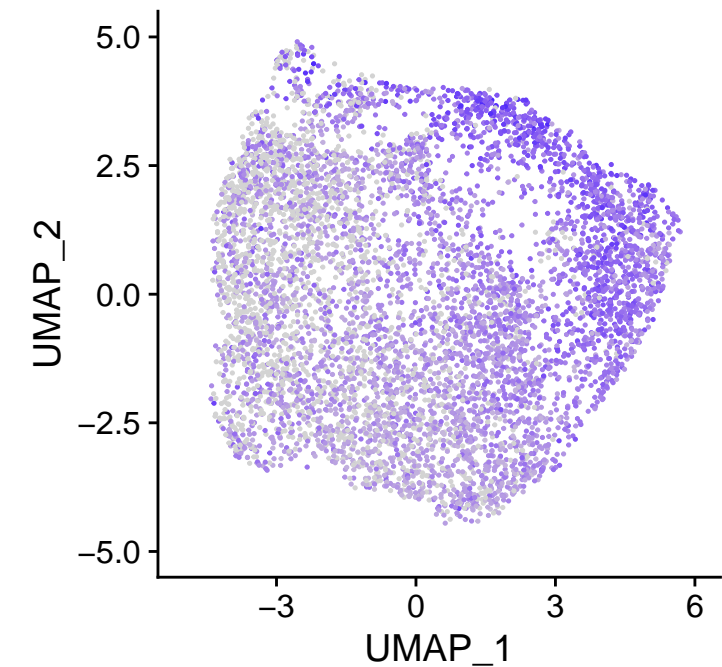**UBE2C**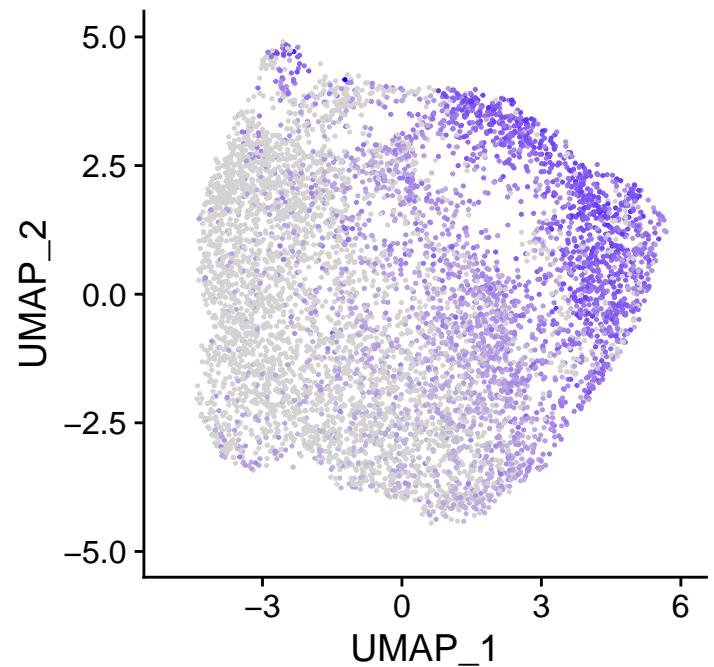**PLK1**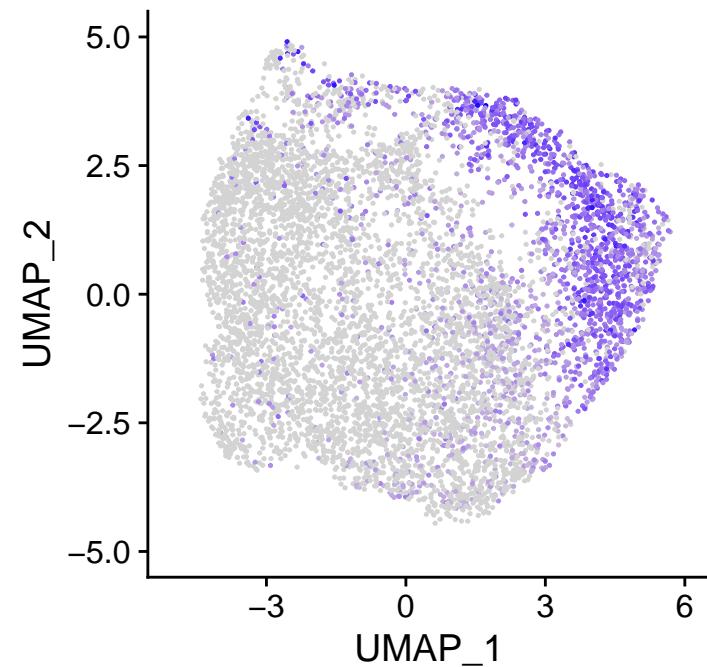**CDCA3**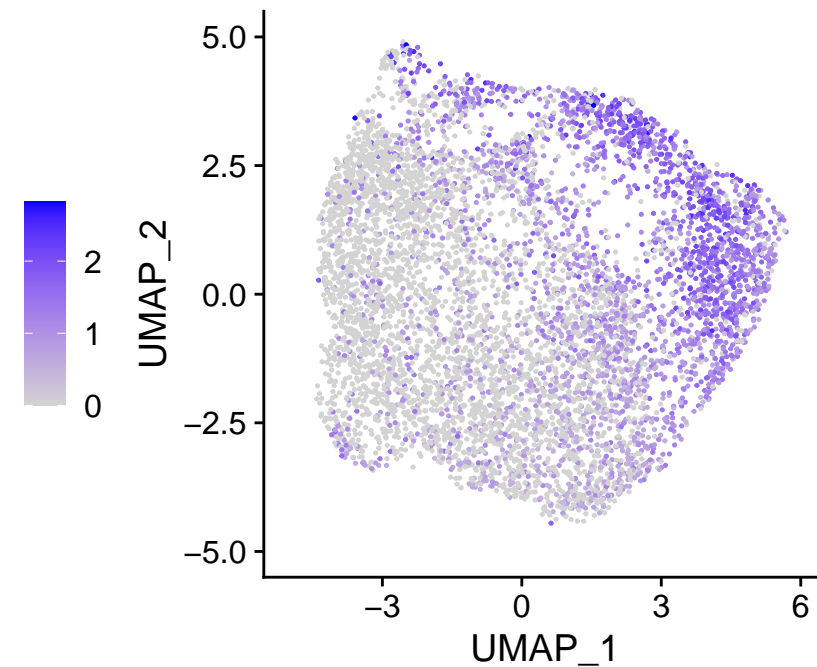**ENSCAFG00000008661**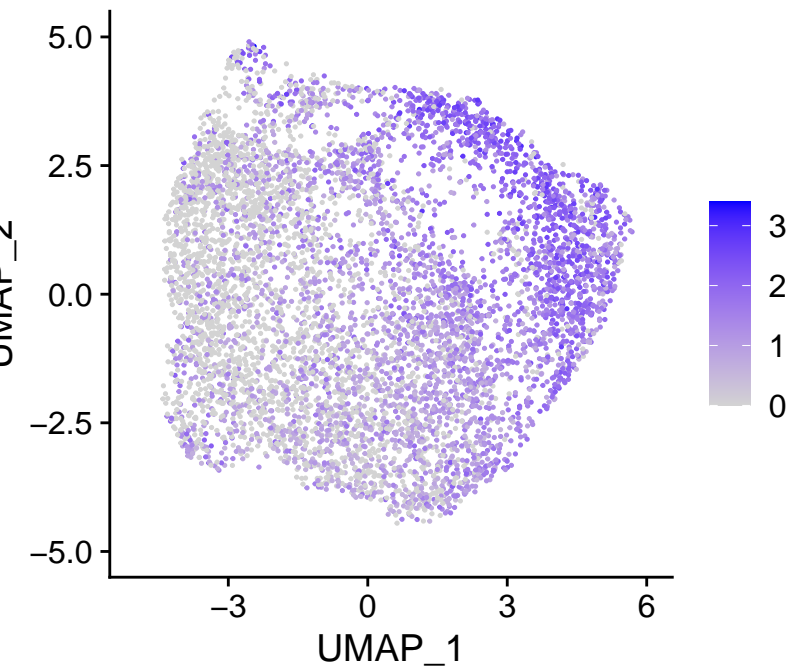



**ENSCAFG00000046600**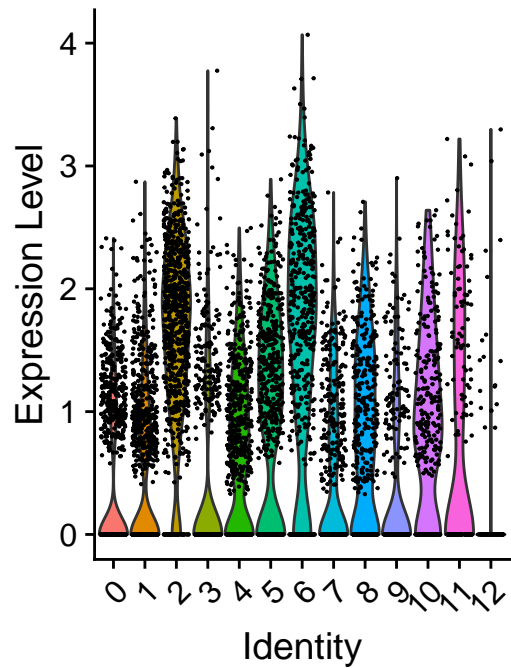**H1-5**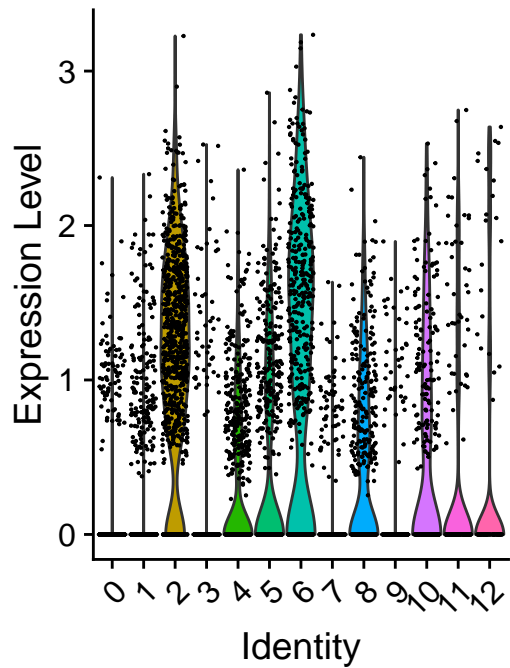**H2AC18**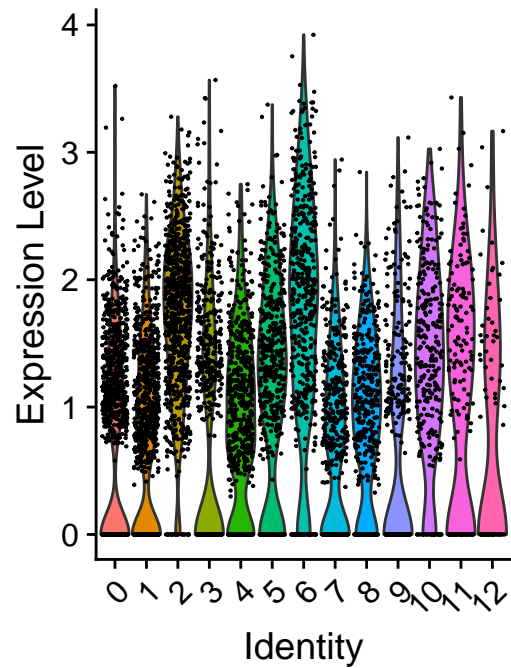**ENSCAFG00000050001**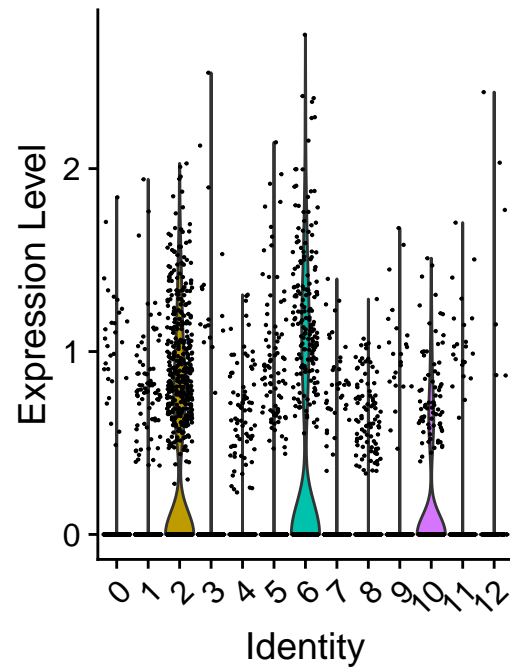**NUDT1**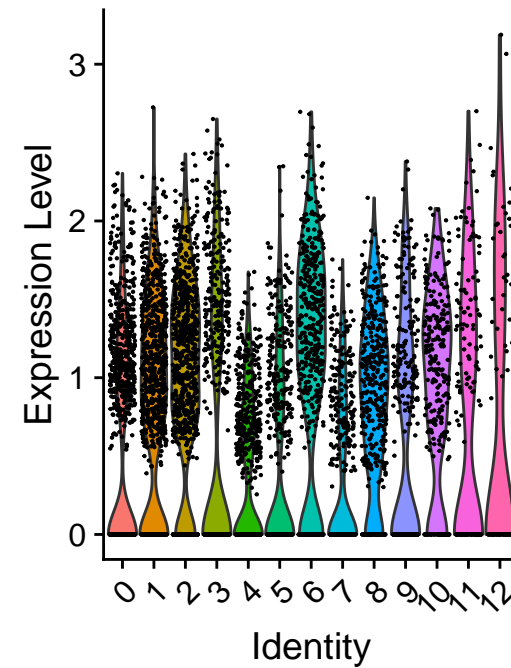**TK1**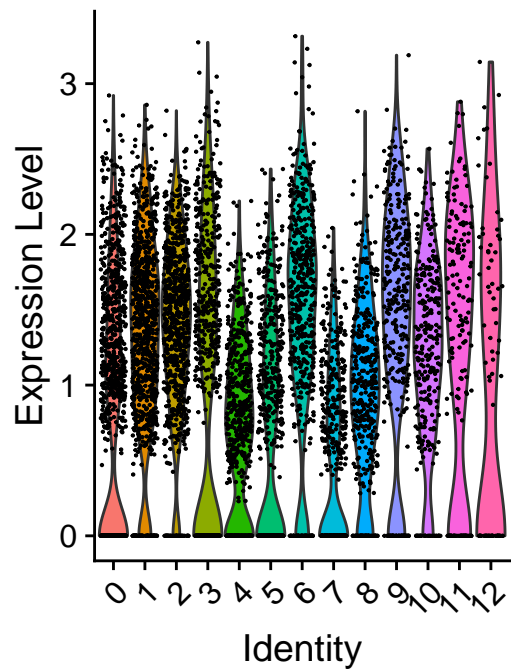**FOS**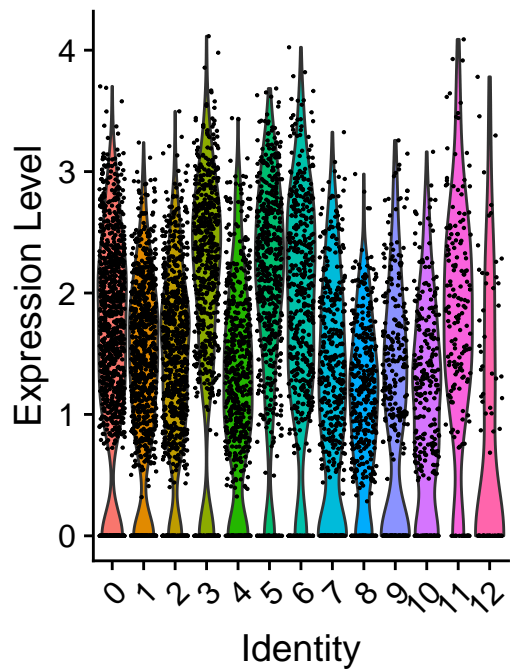**CCL7**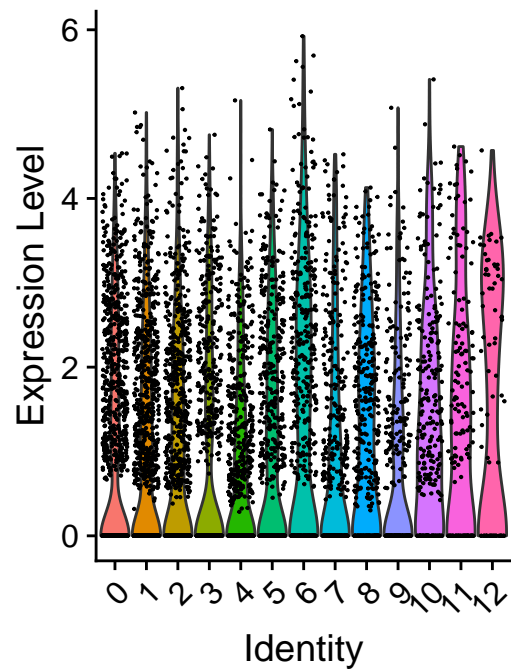**ENSCAFG00000042676**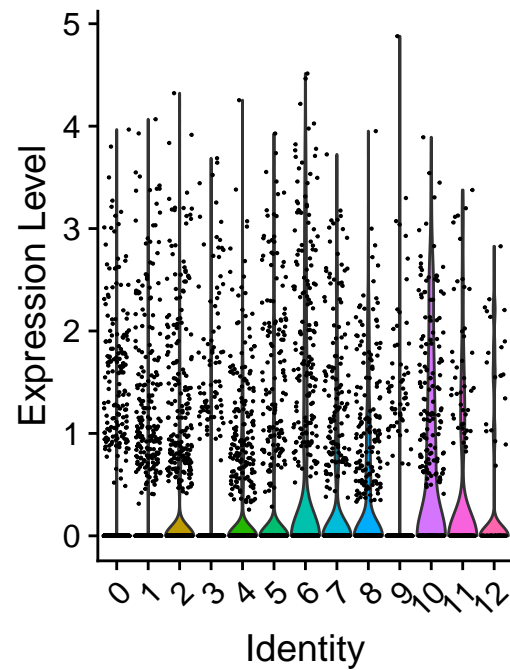**CXCL8**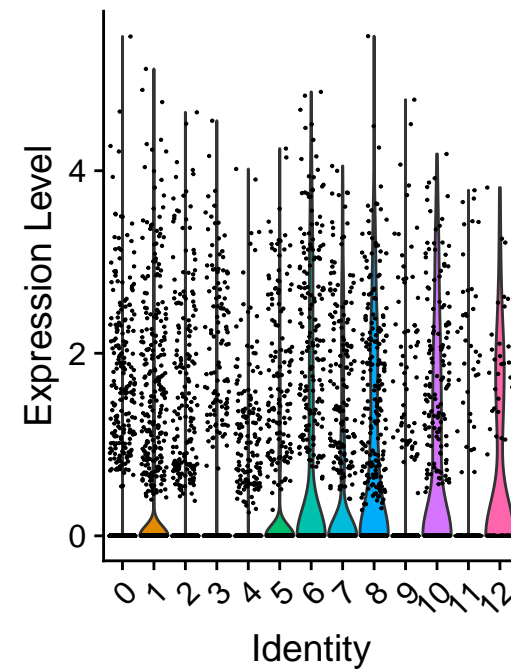



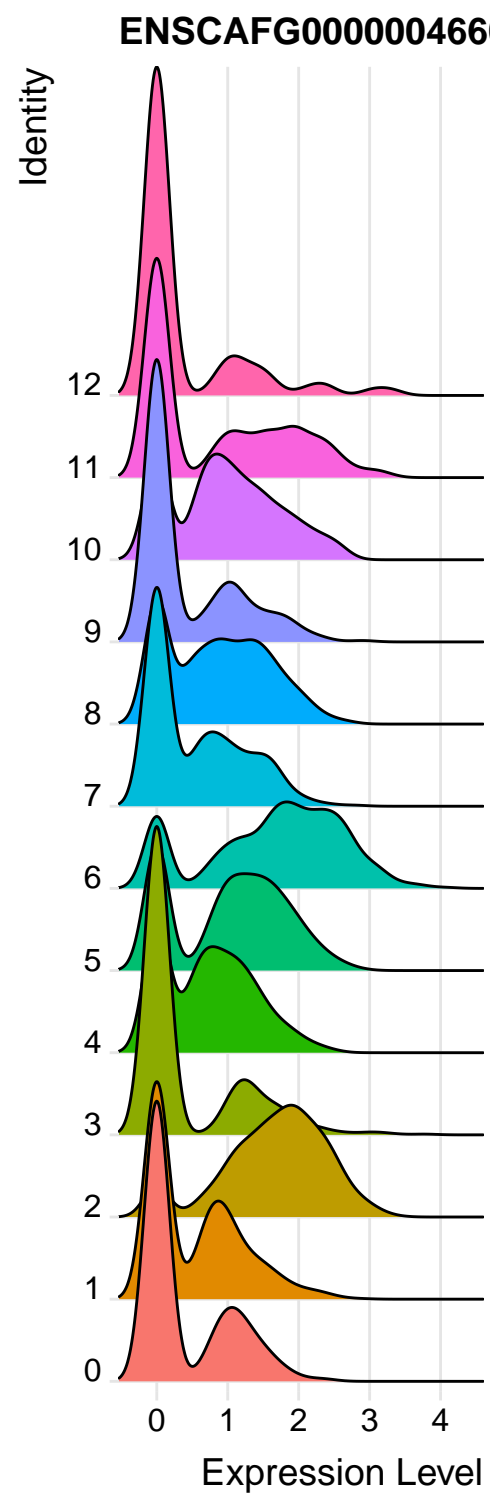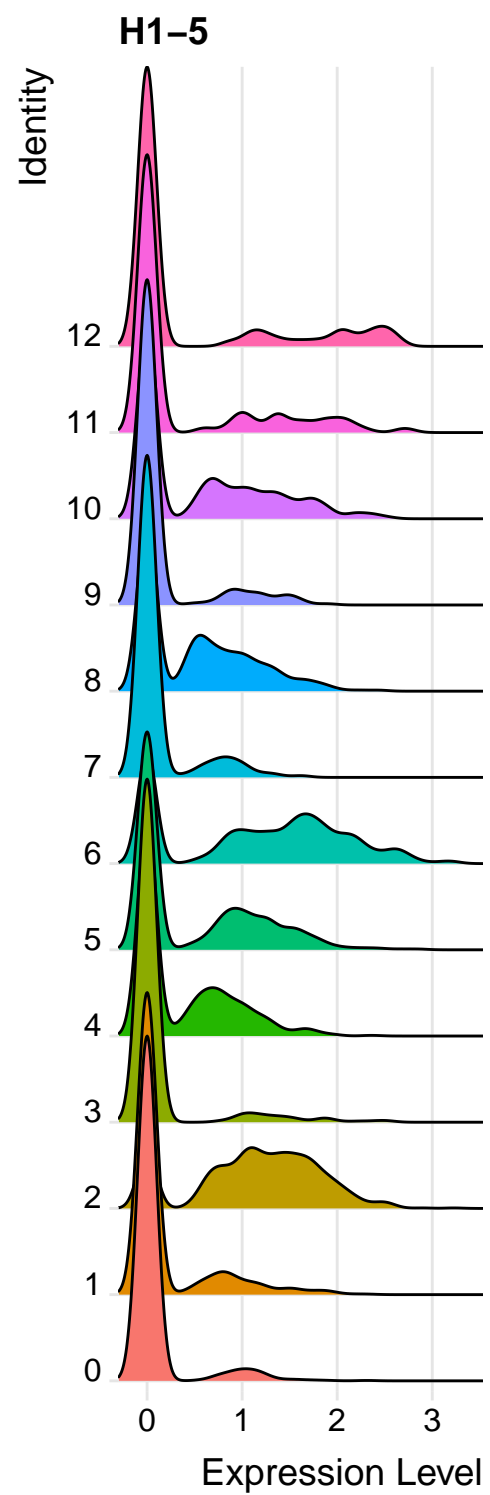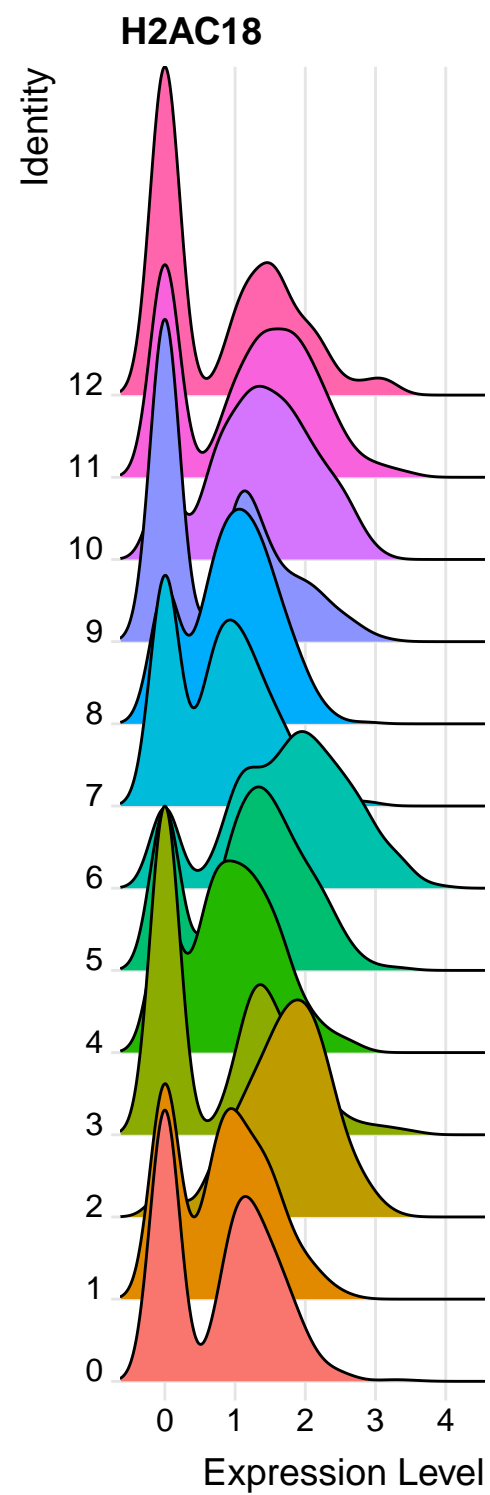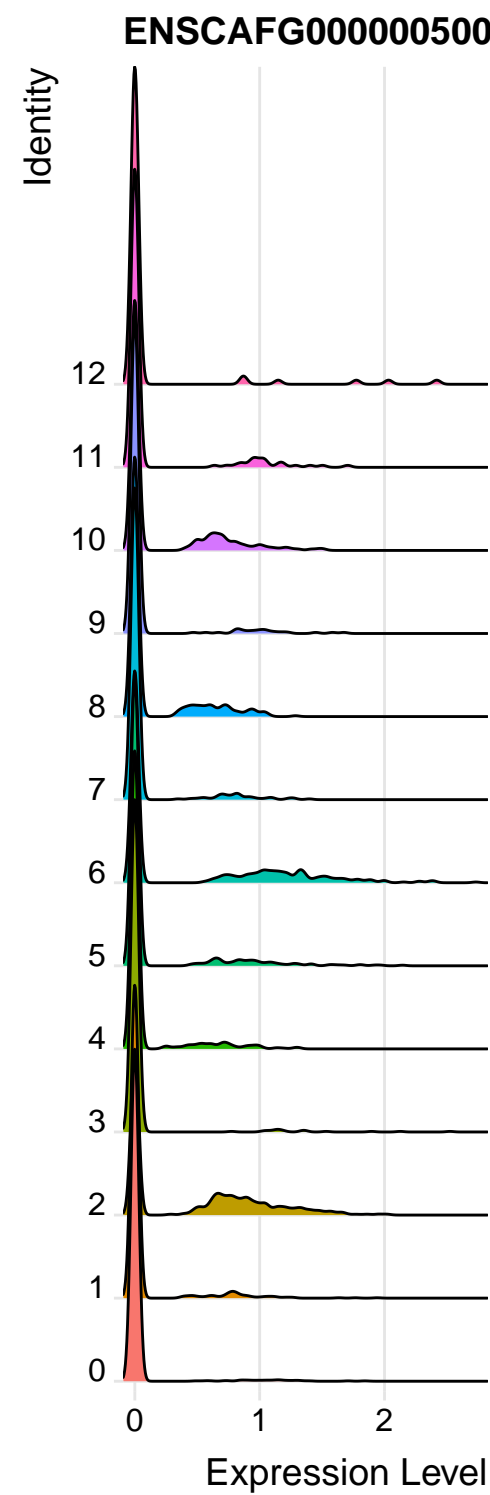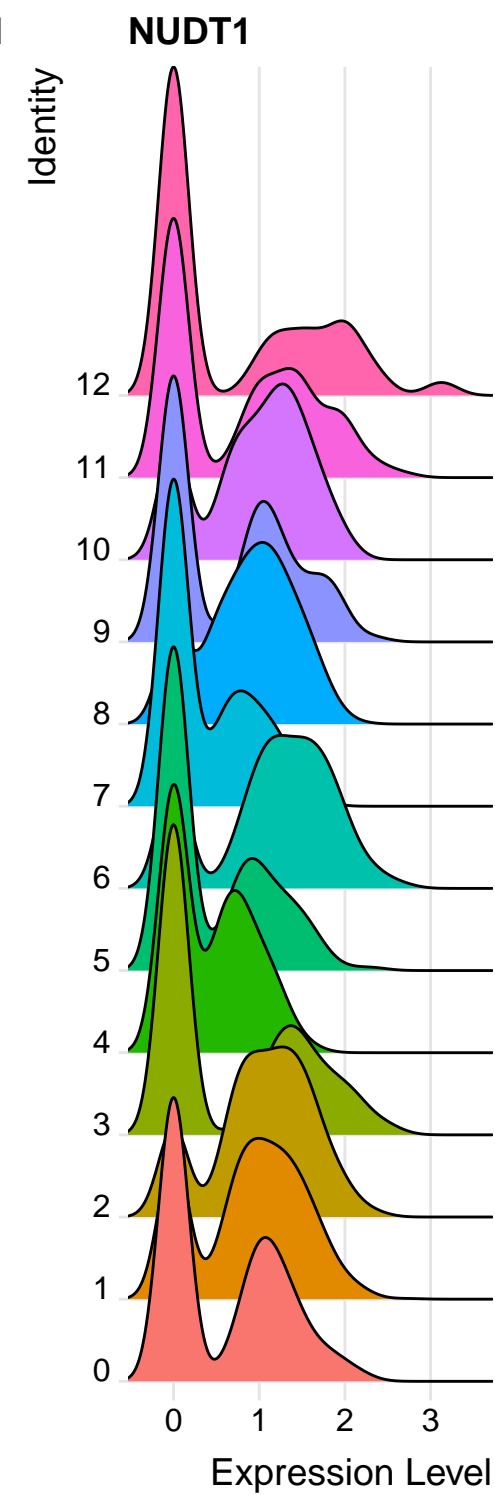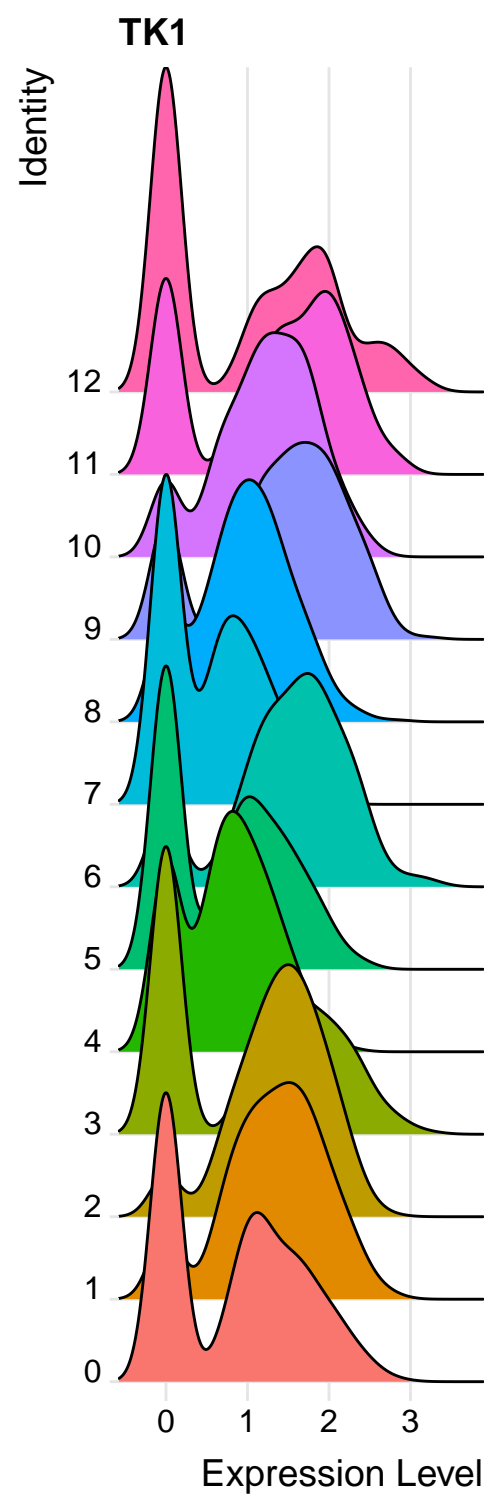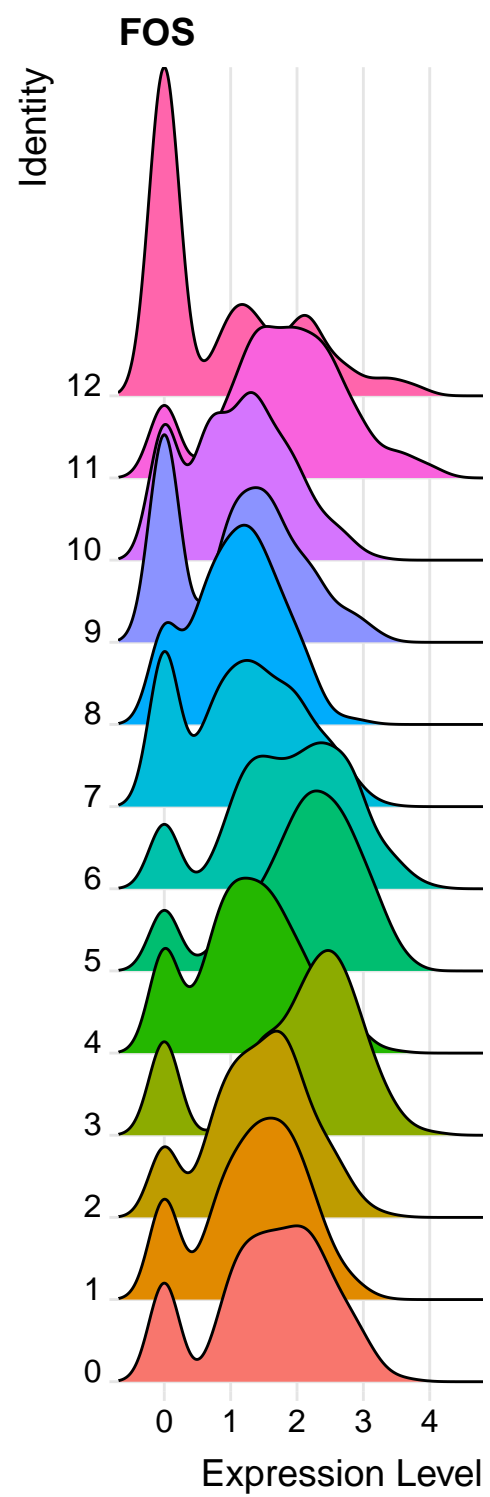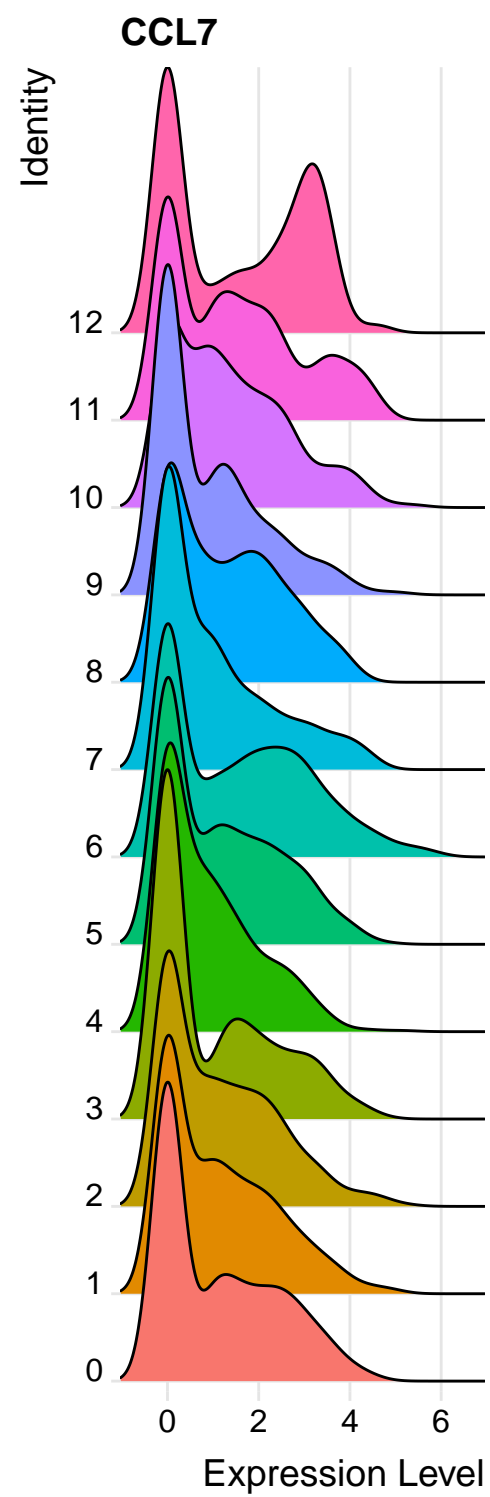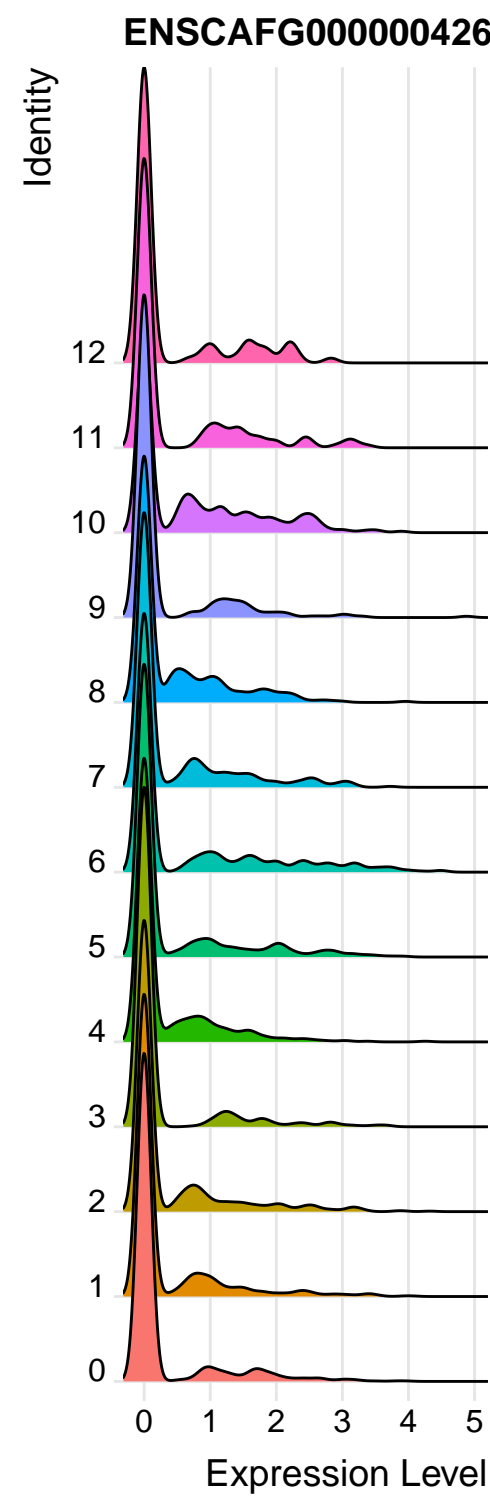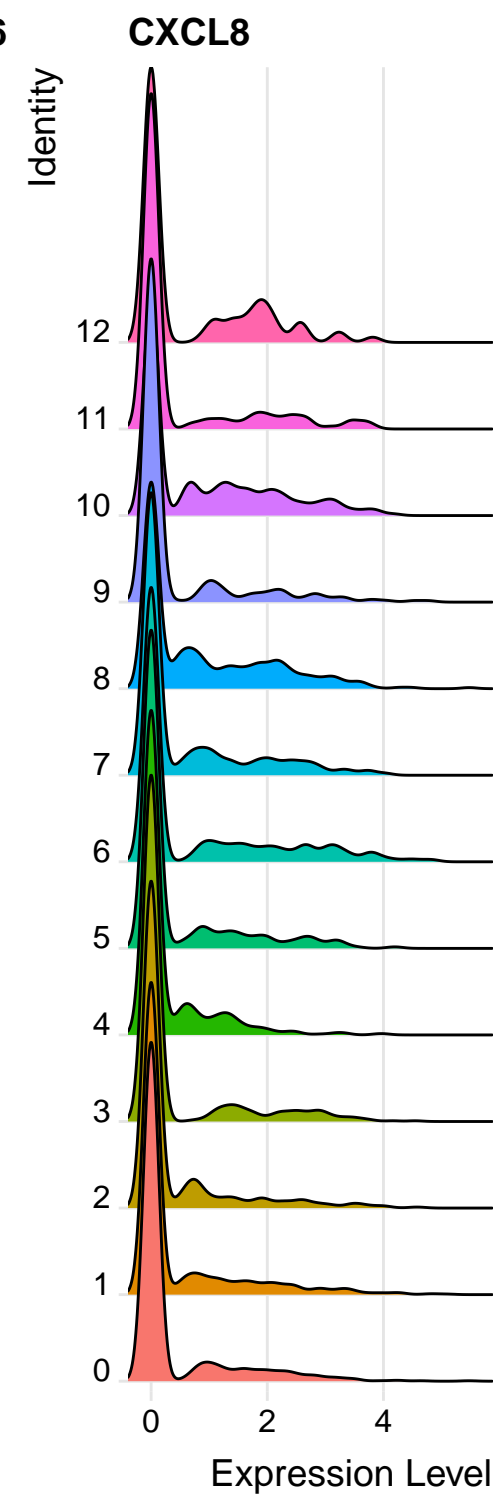



**ENSCAFG00000046600**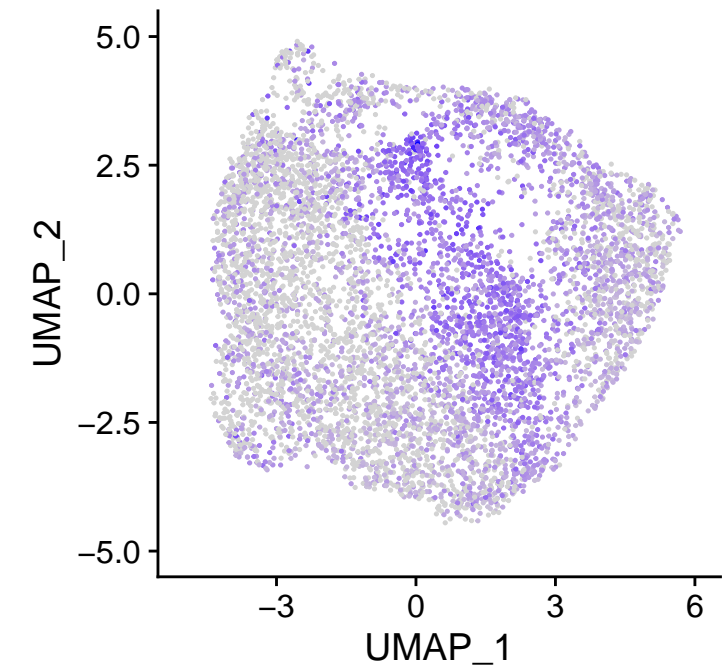**H1-5**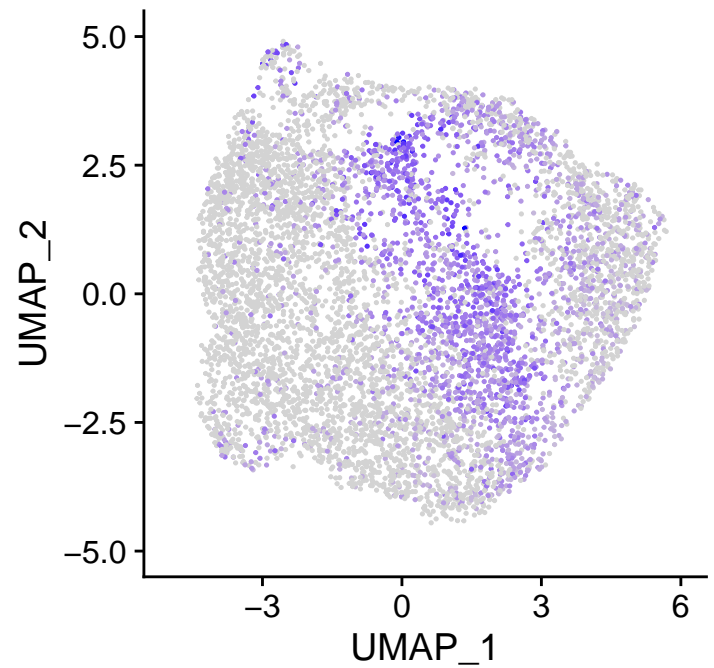**H2AC18**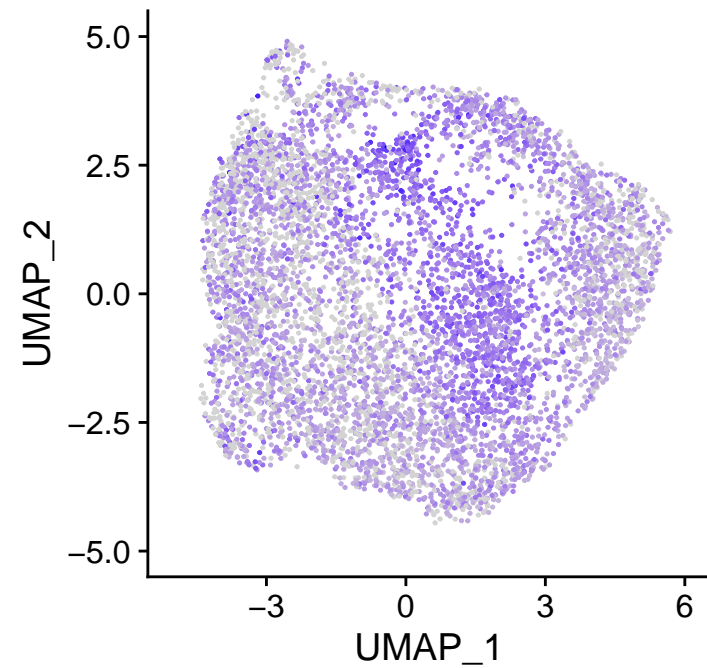**ENSCAFG00000050001**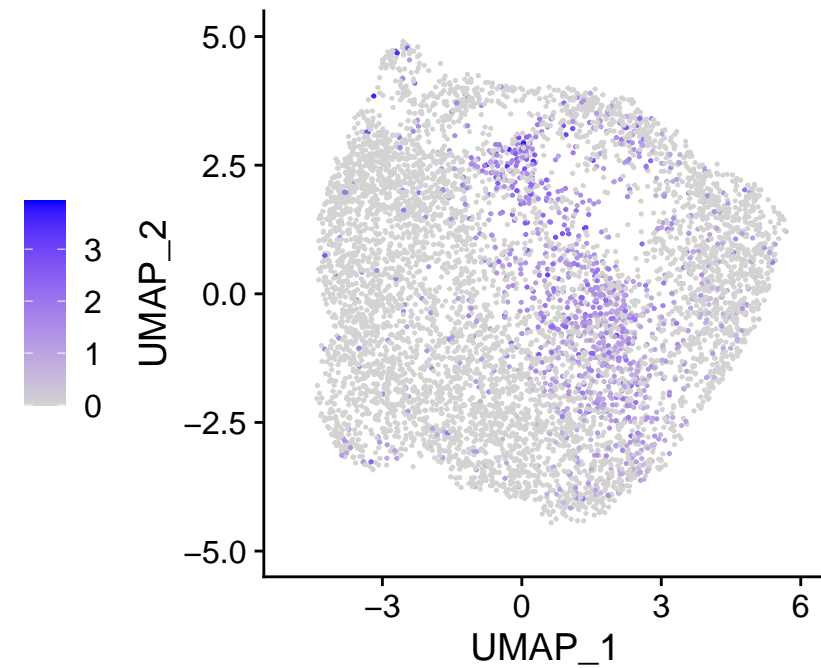**NUDT1**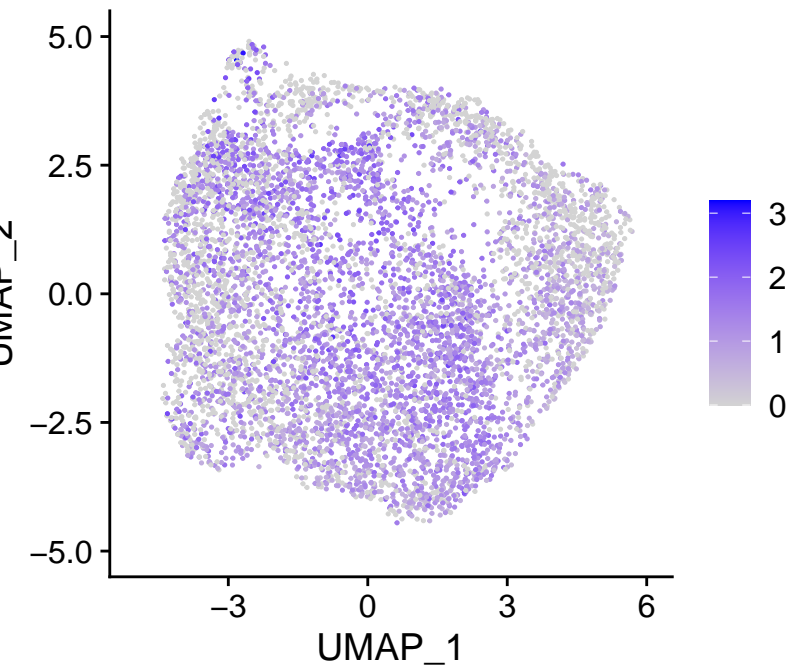**TK1**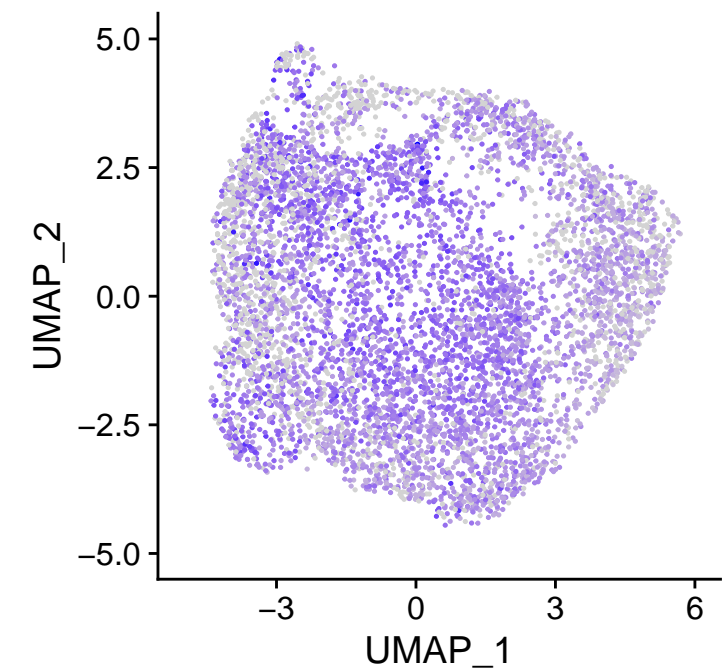**FOS**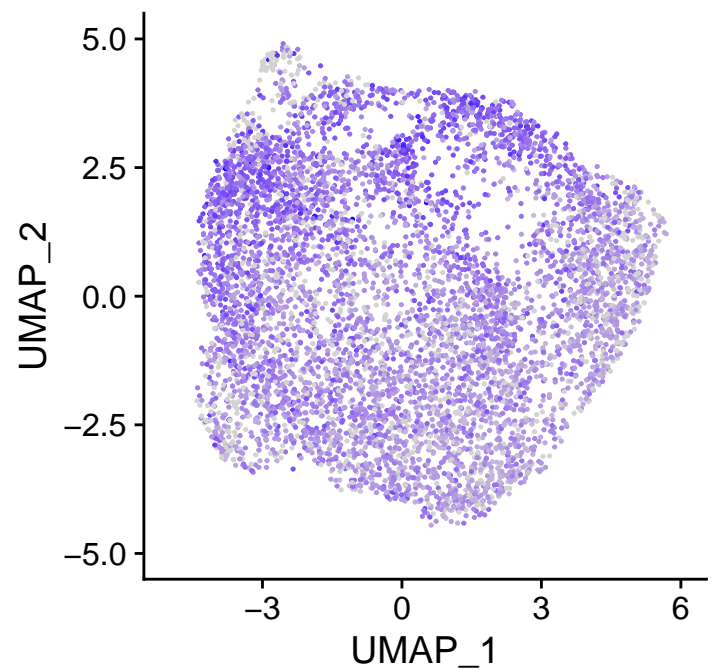**CCL7**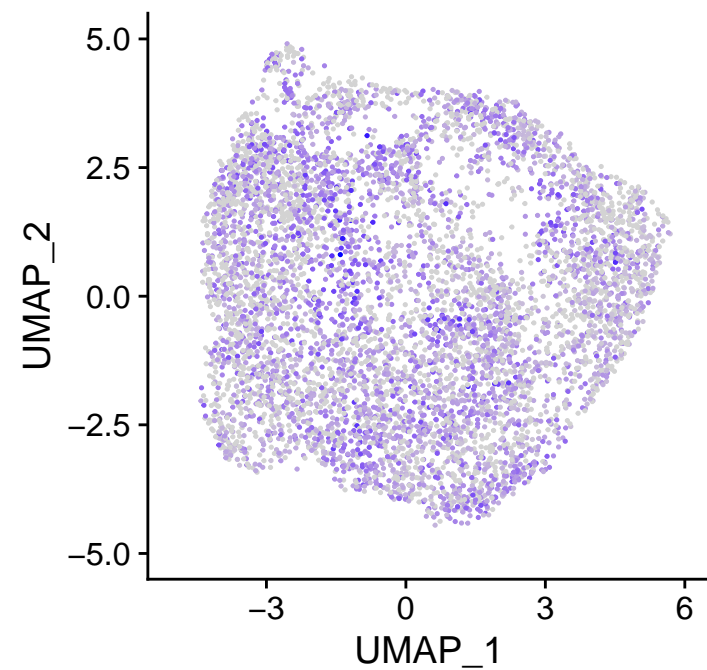**ENSCAFG00000042676**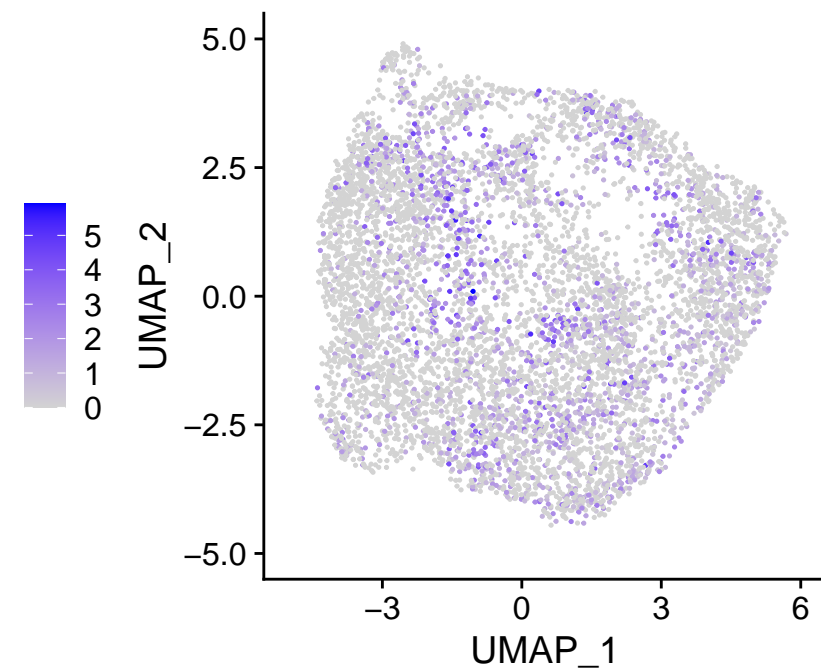**CXCL8**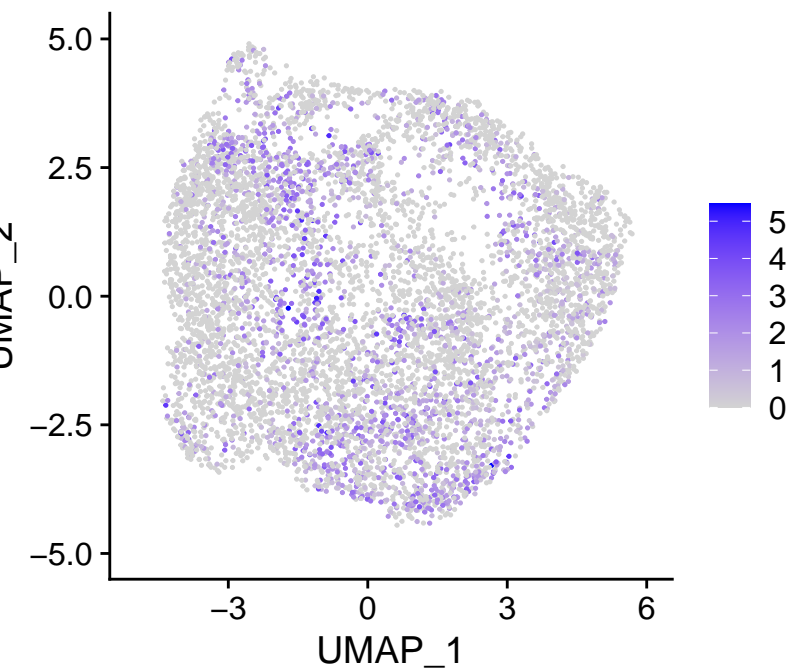

**ENSCAFG00000017264**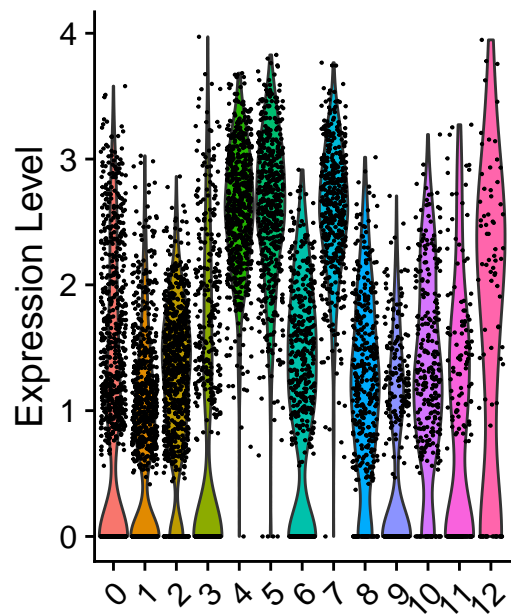

Identity

**CDC20**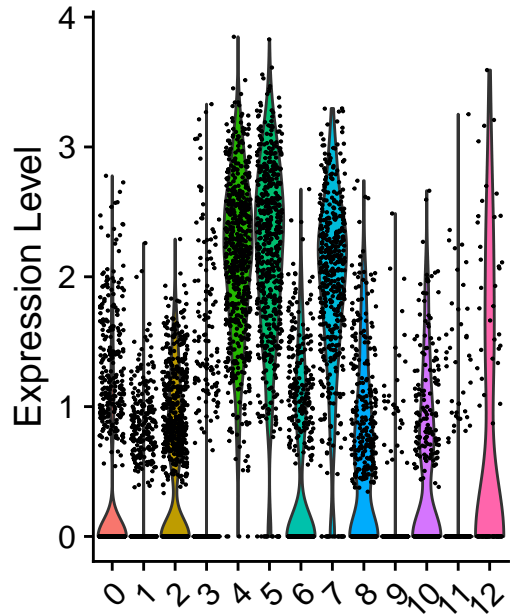

Identity

**ENSCAFG00000007705**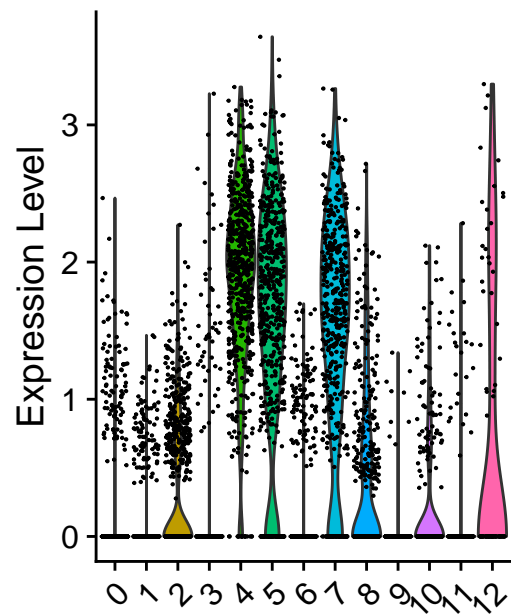

Identity

**LMNA**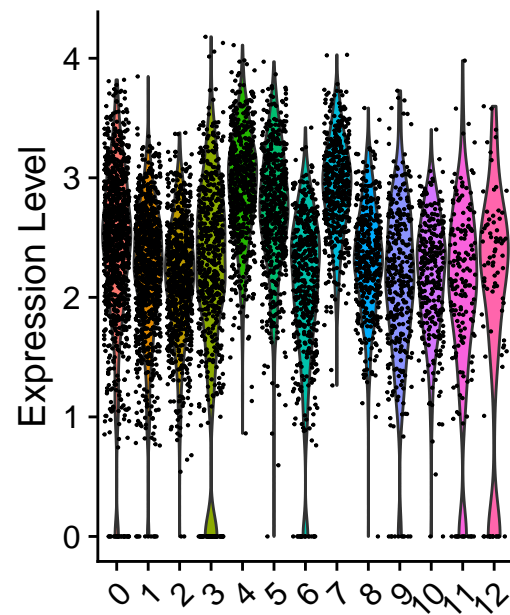

Identity

**BUB1B**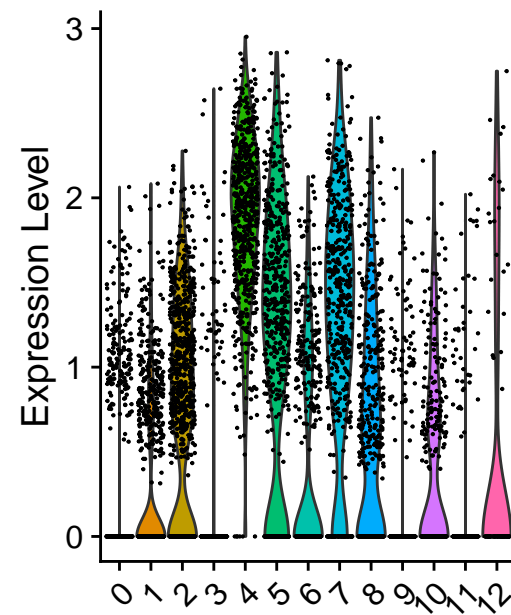

Identity

**UBE2S**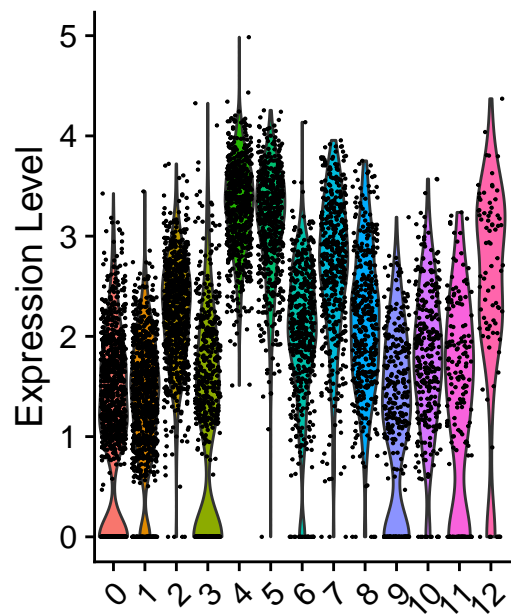

Identity

**TPX2**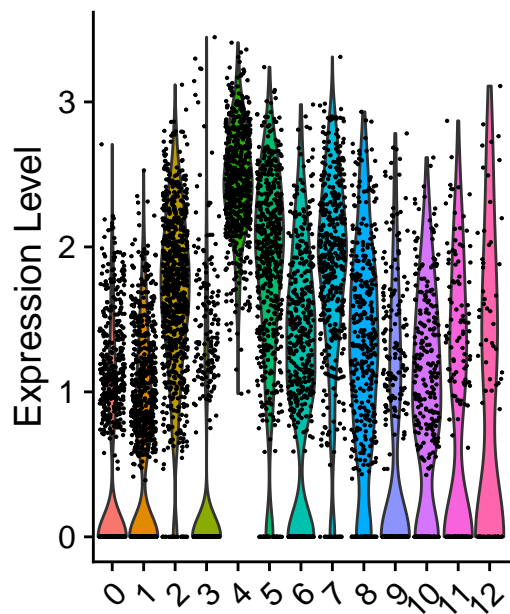

Identity

**DLGAP5**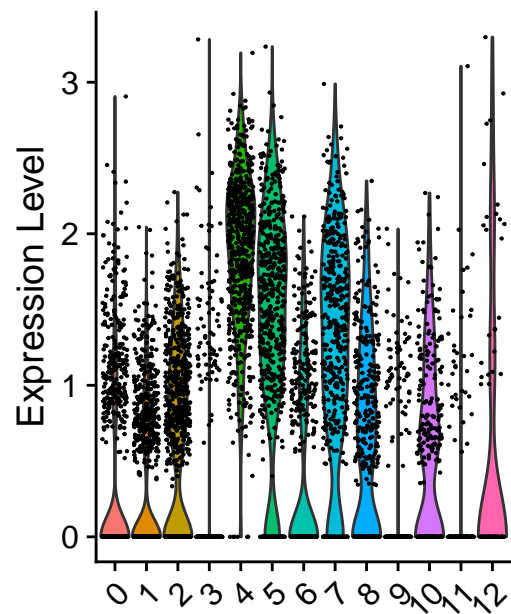

Identity

**BUB1**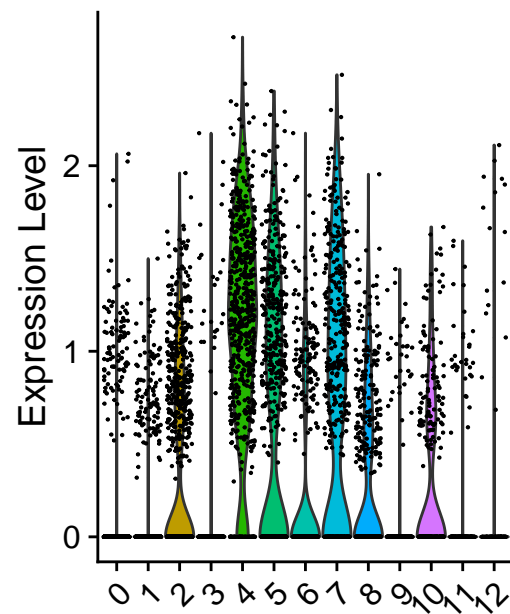

Identity

**MSMO1.1**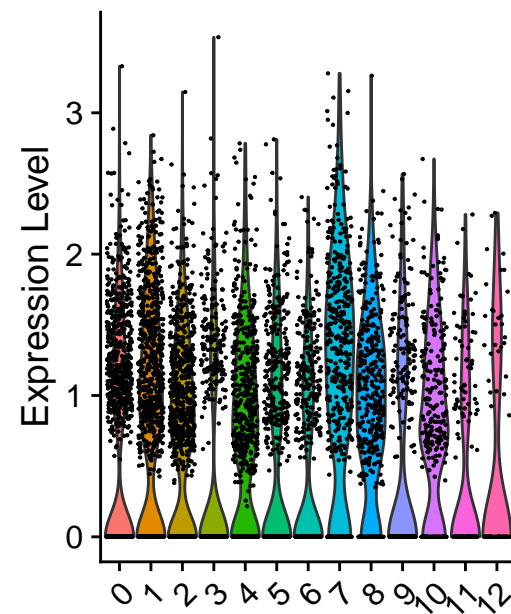

Identity



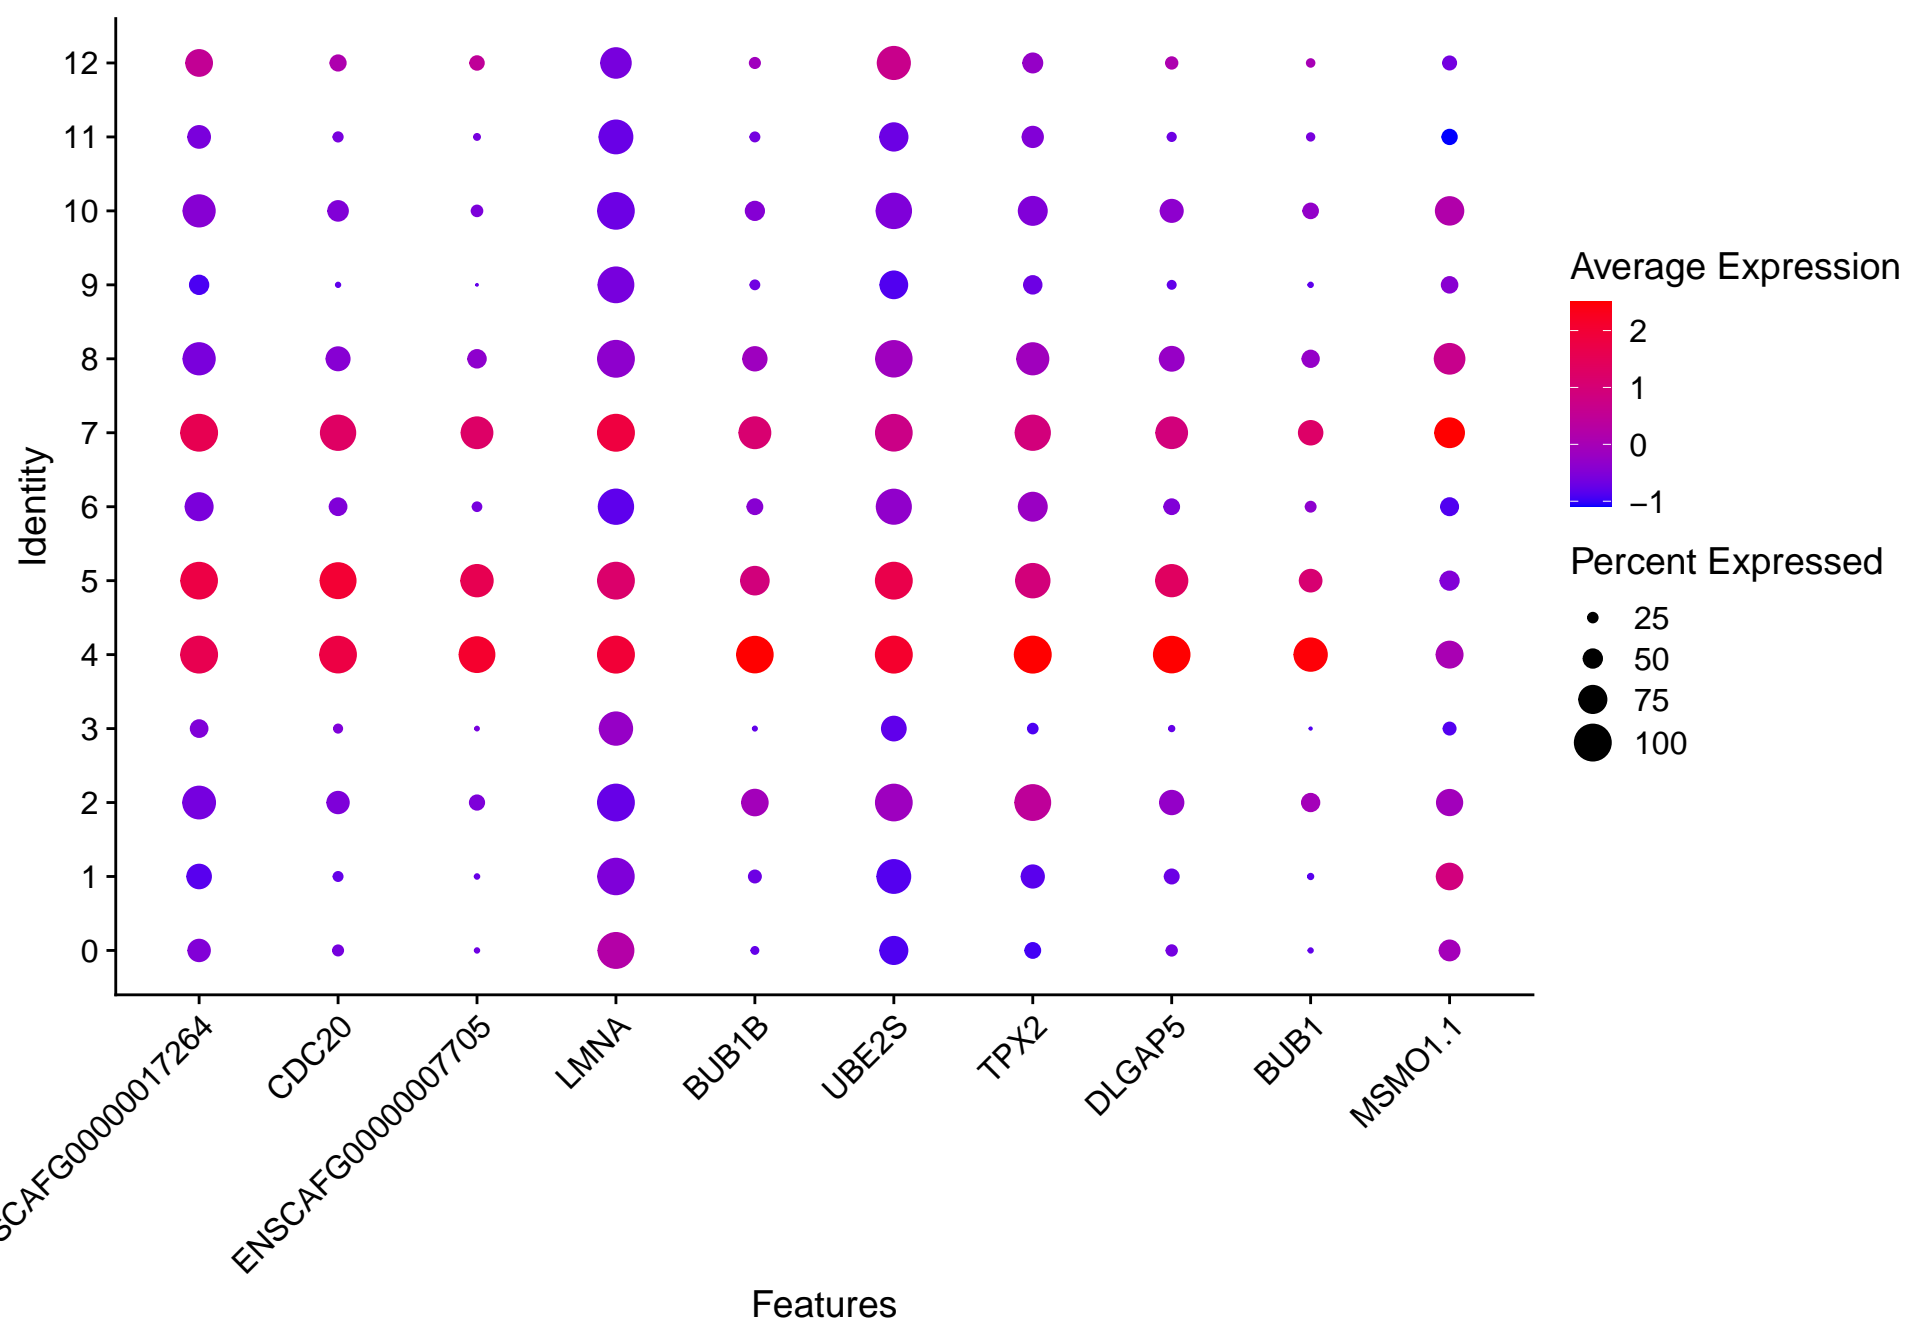



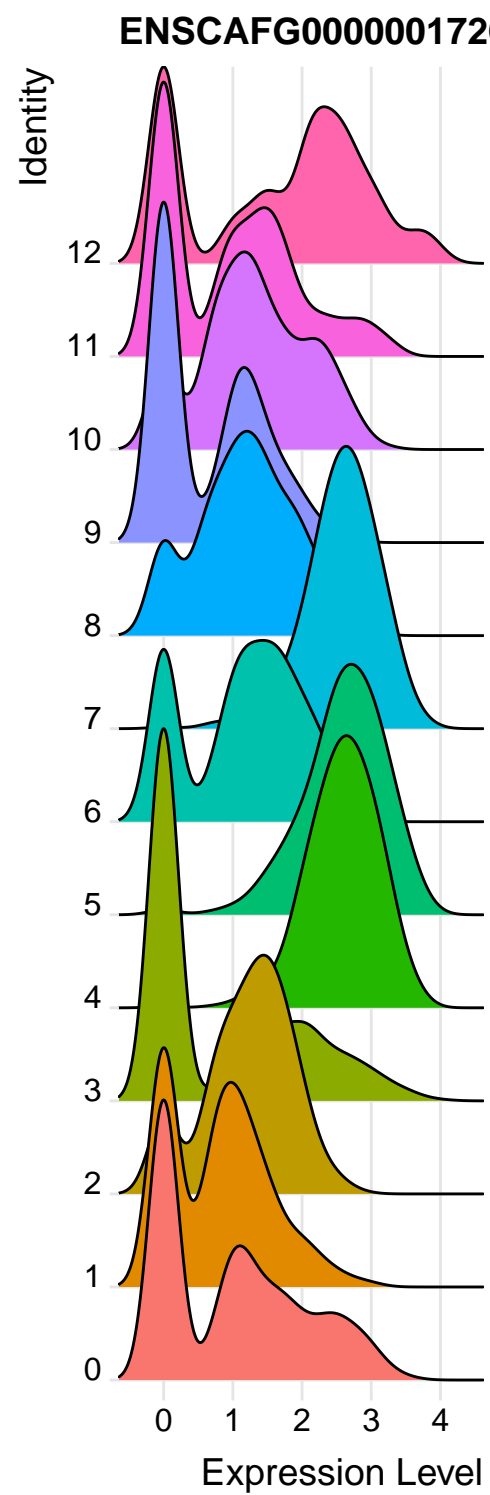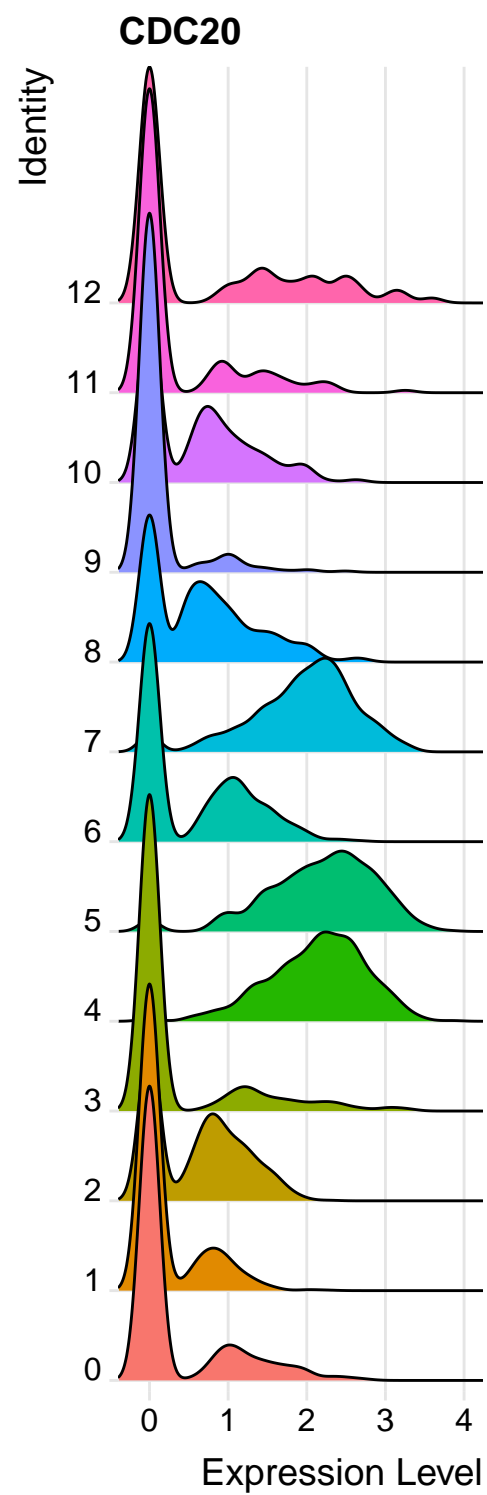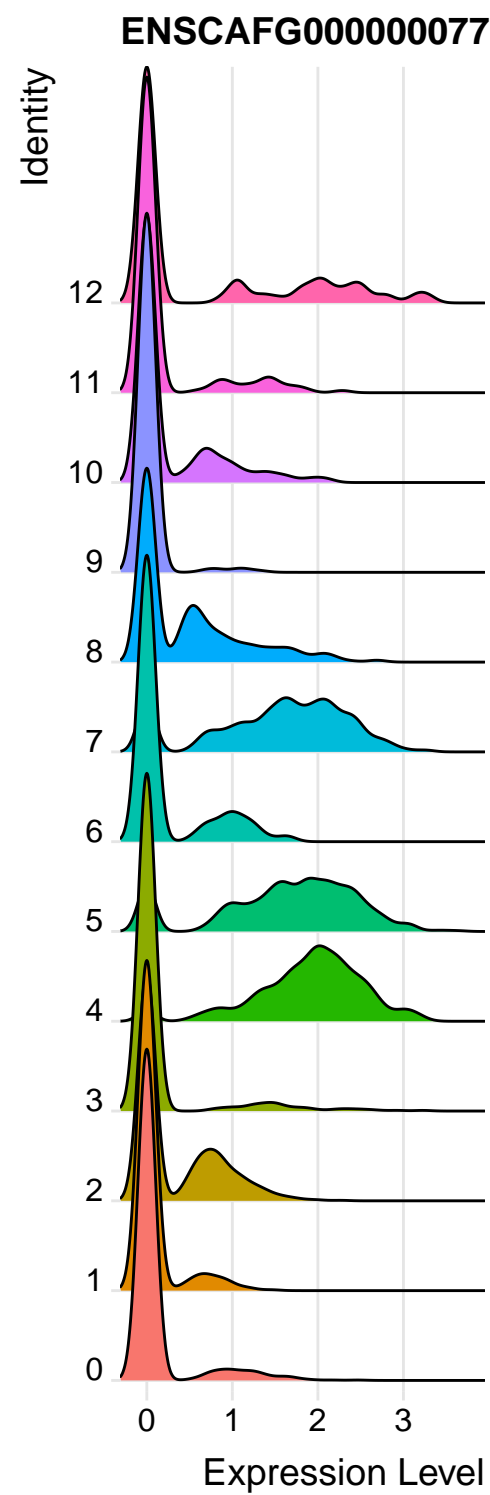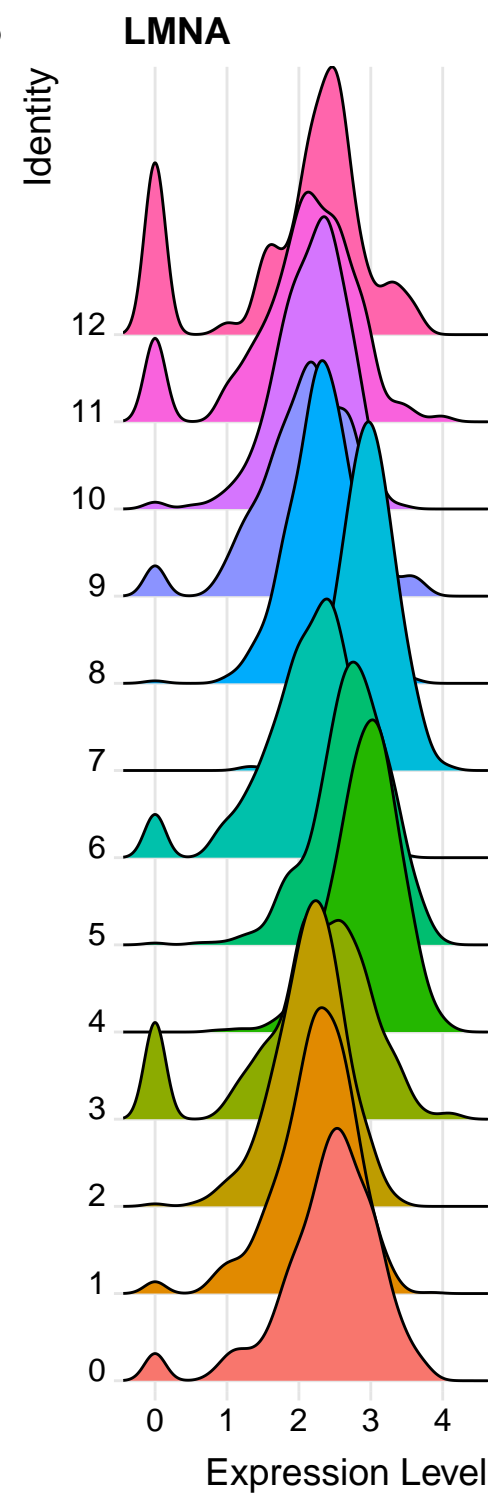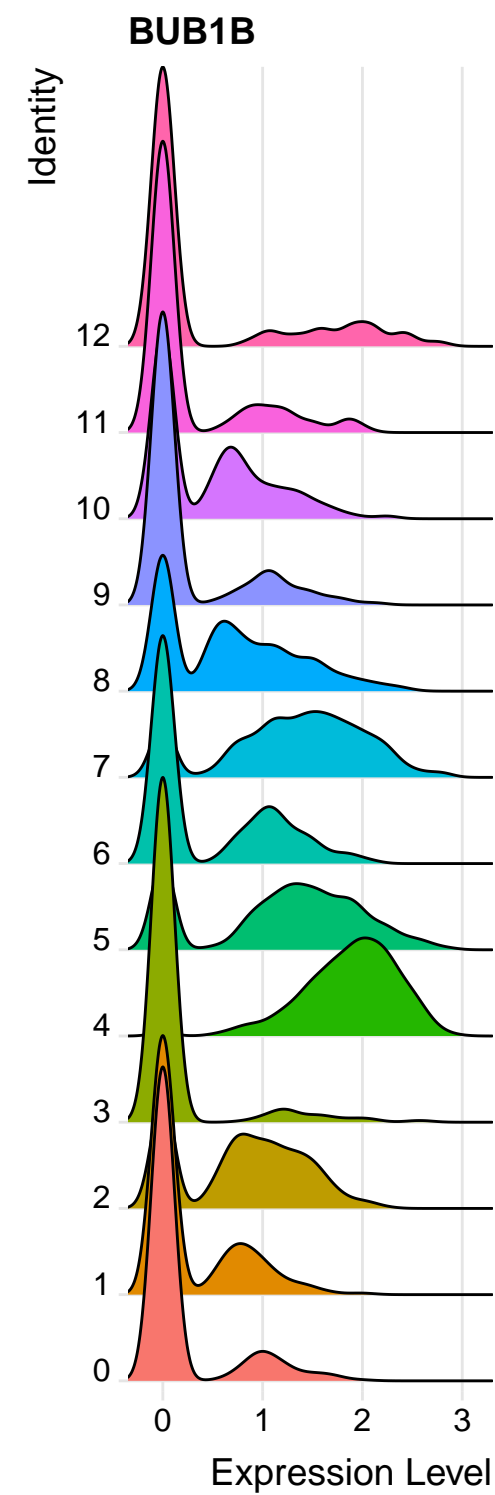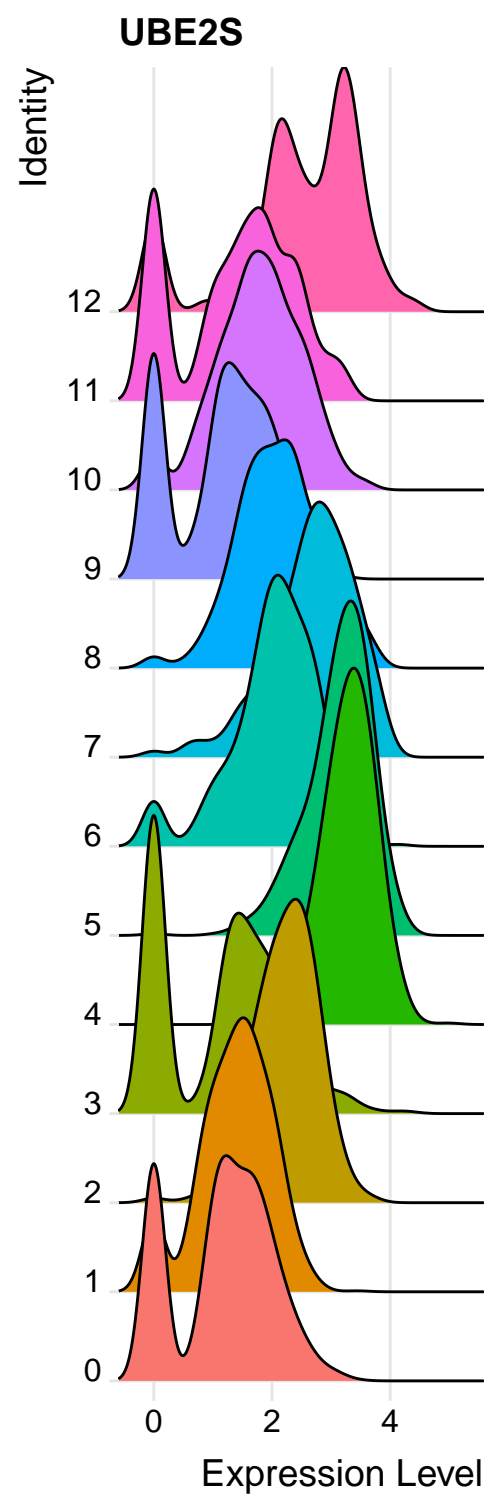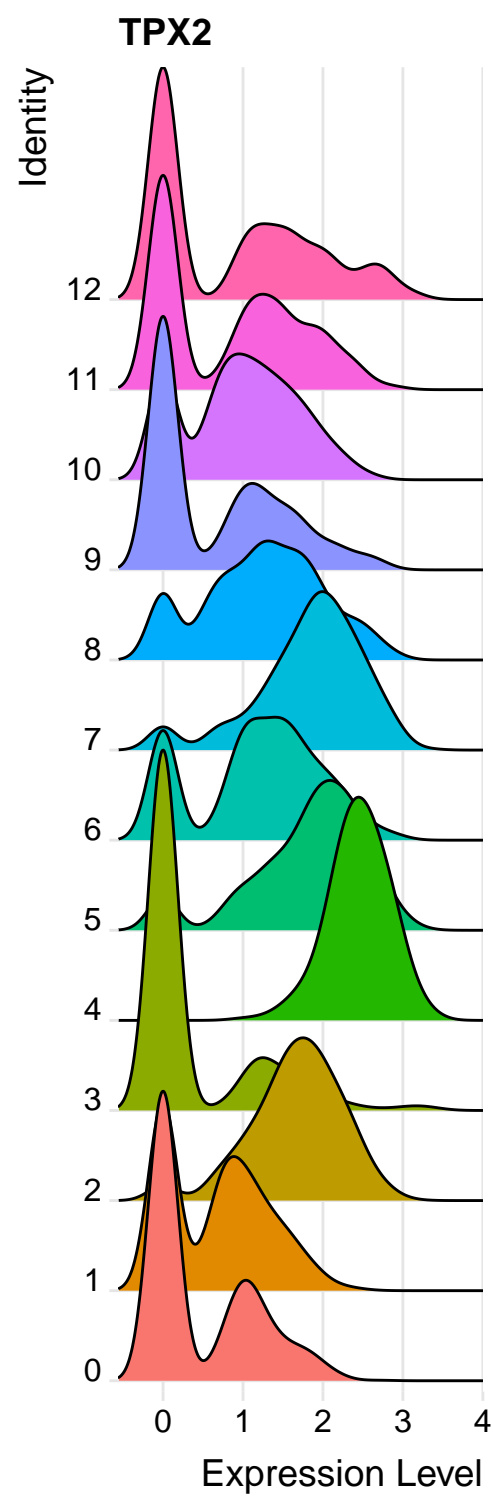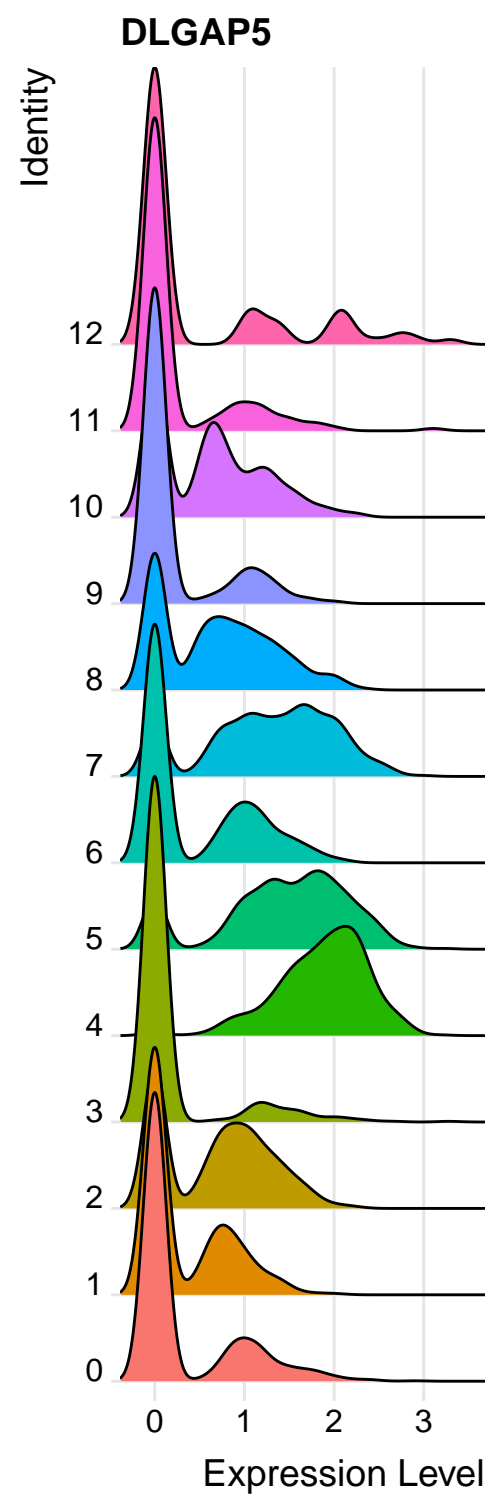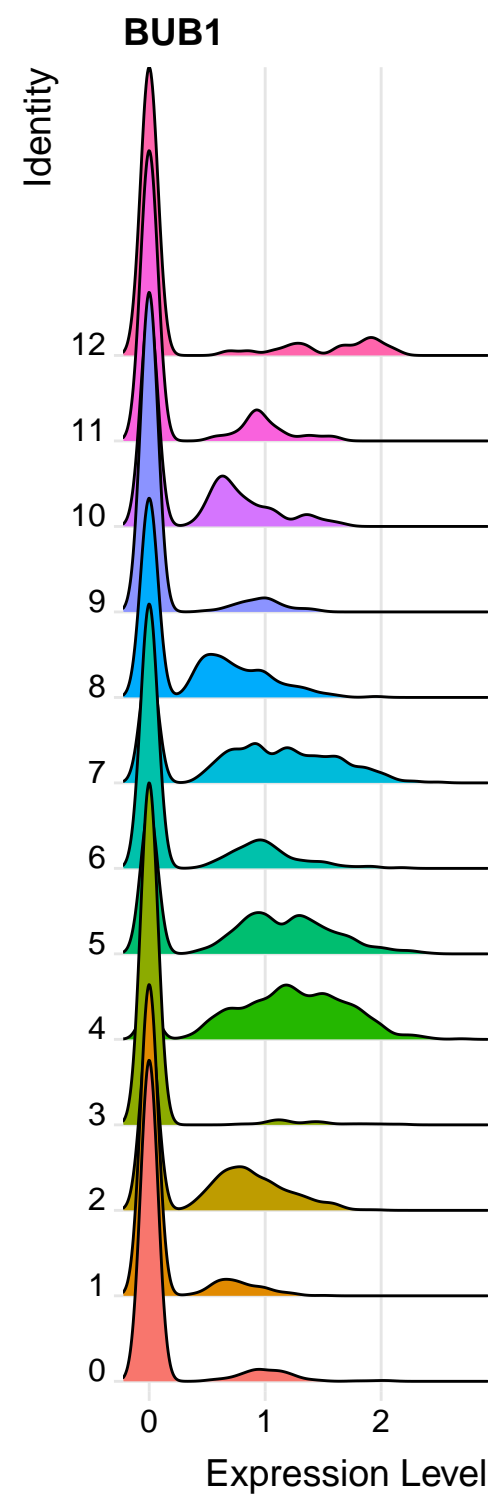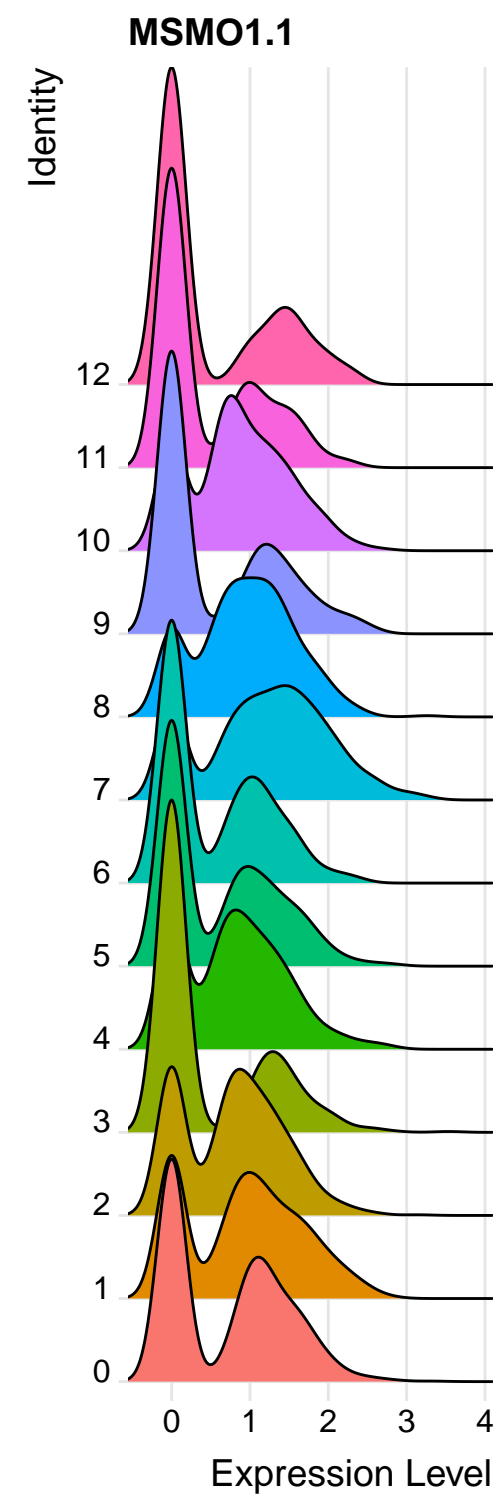

**ENSCAFG00000017264**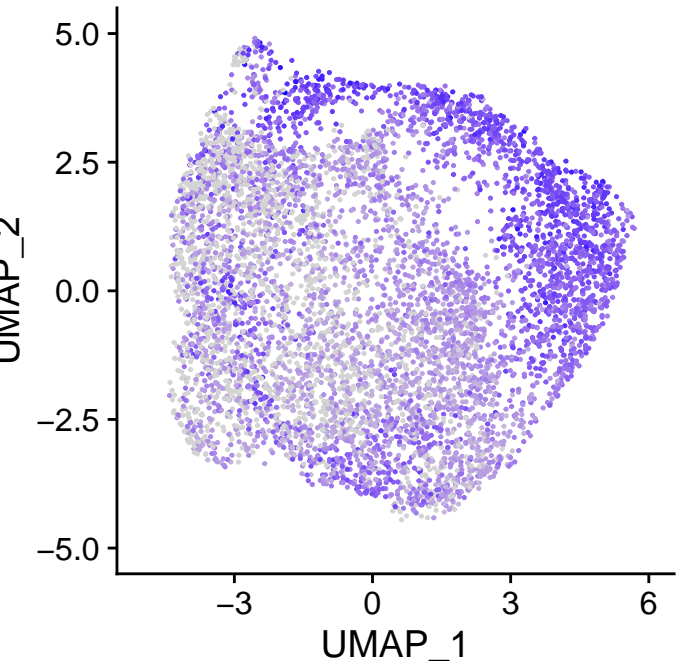**CDC20**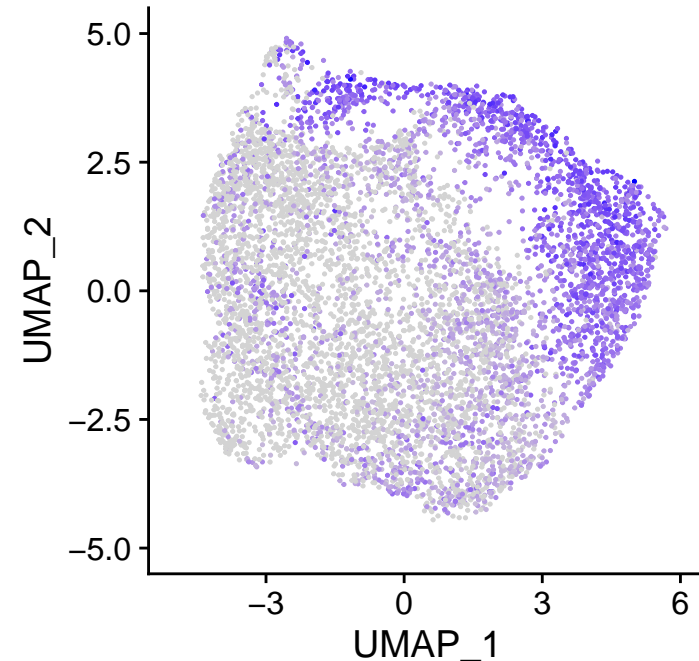**ENSCAFG00000007705**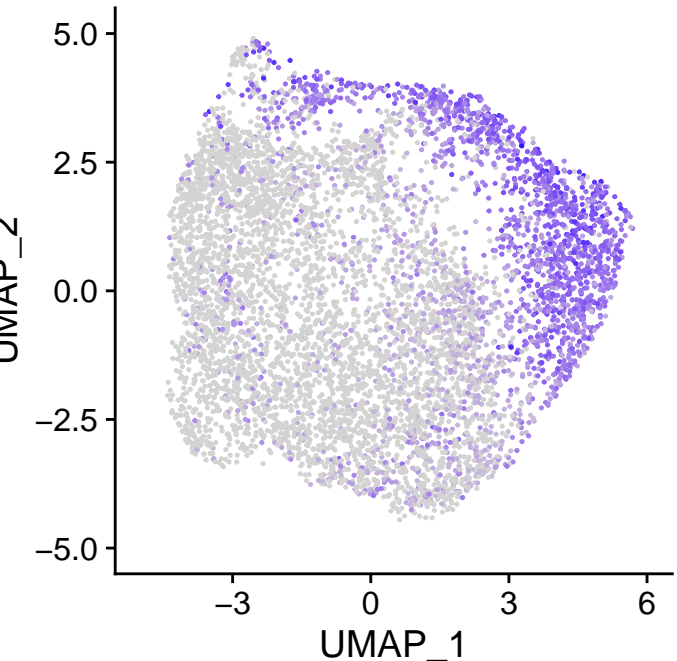**LMNA**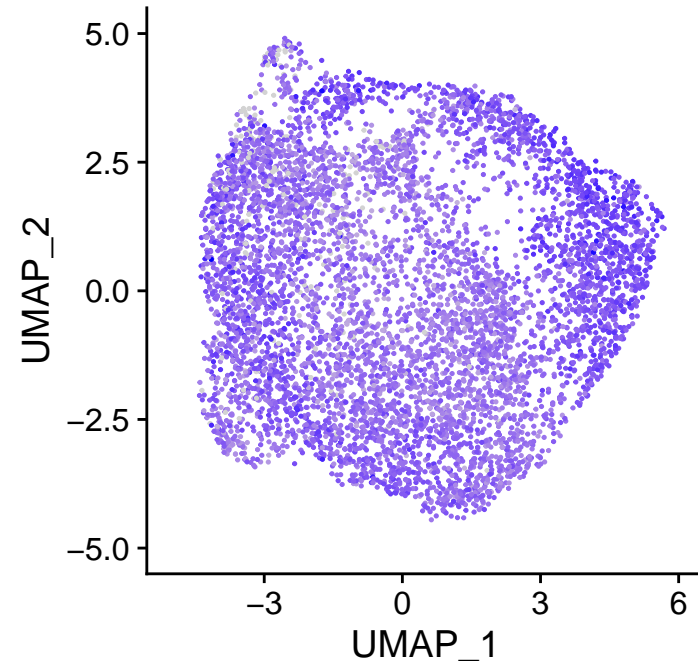**BUB1B**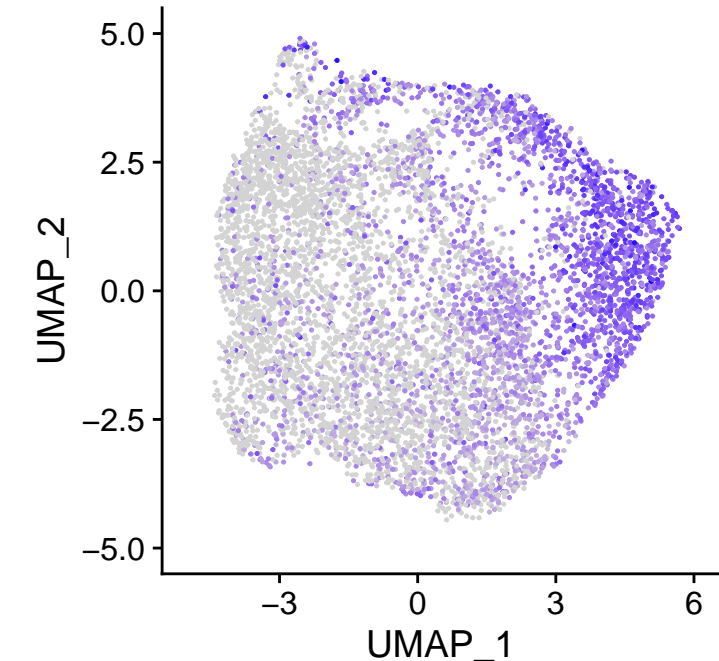**UBE2S**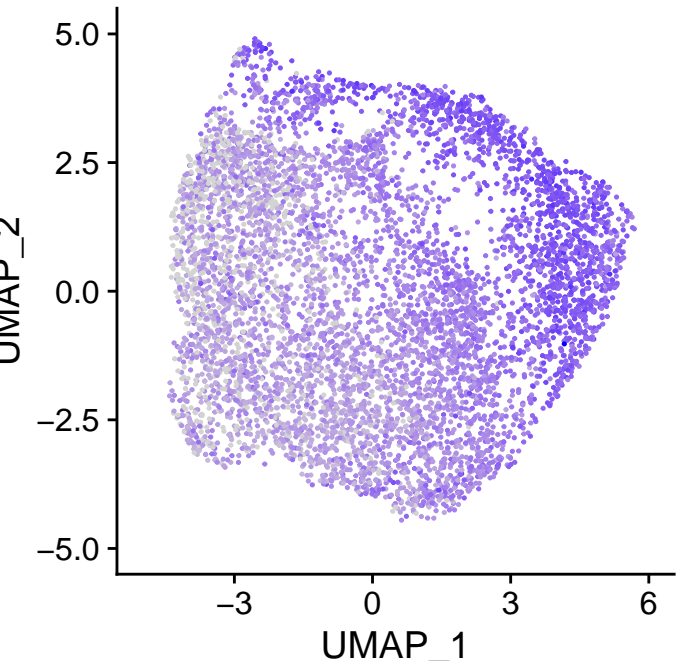**TPX2**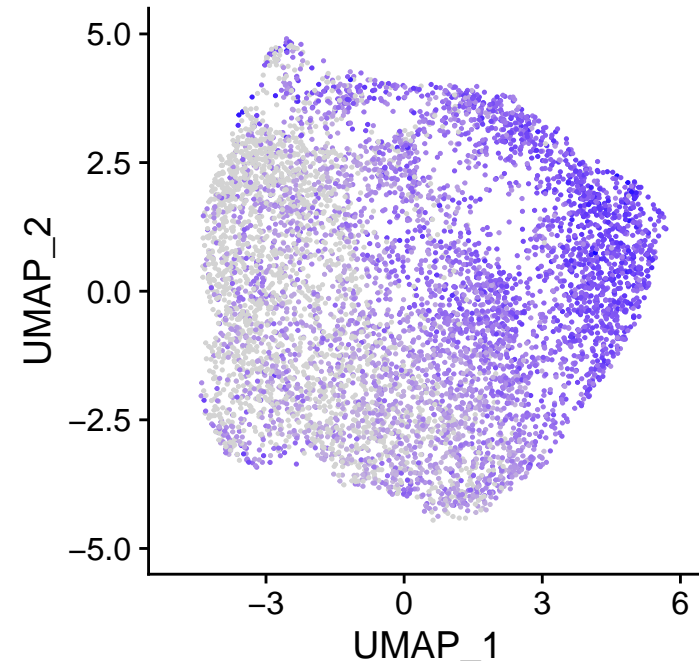**DLGAP5**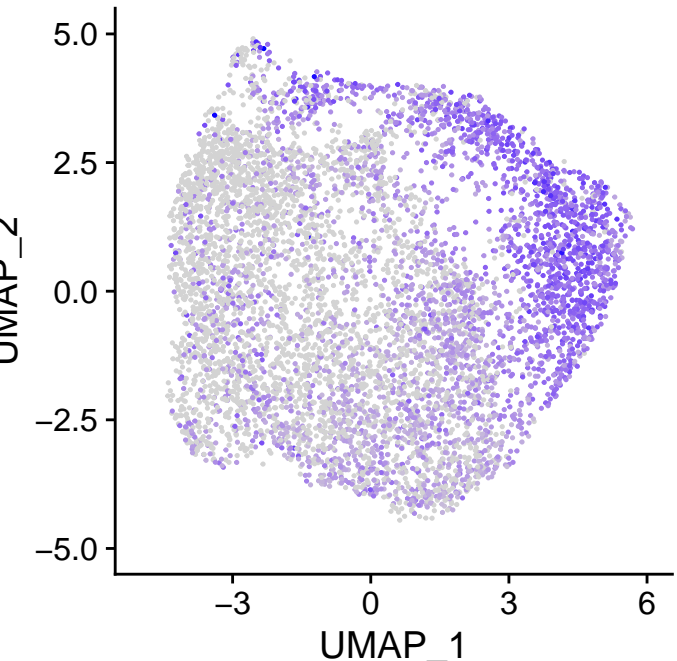**BUB1**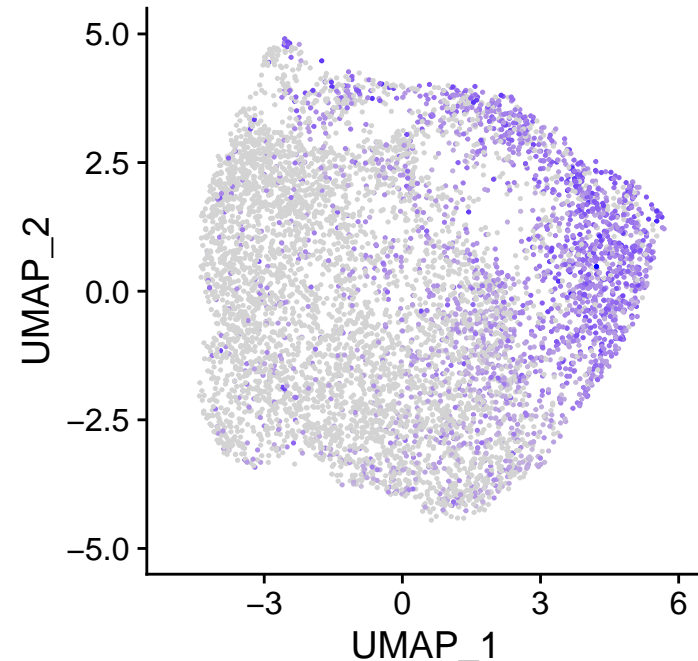**MSMO1.1**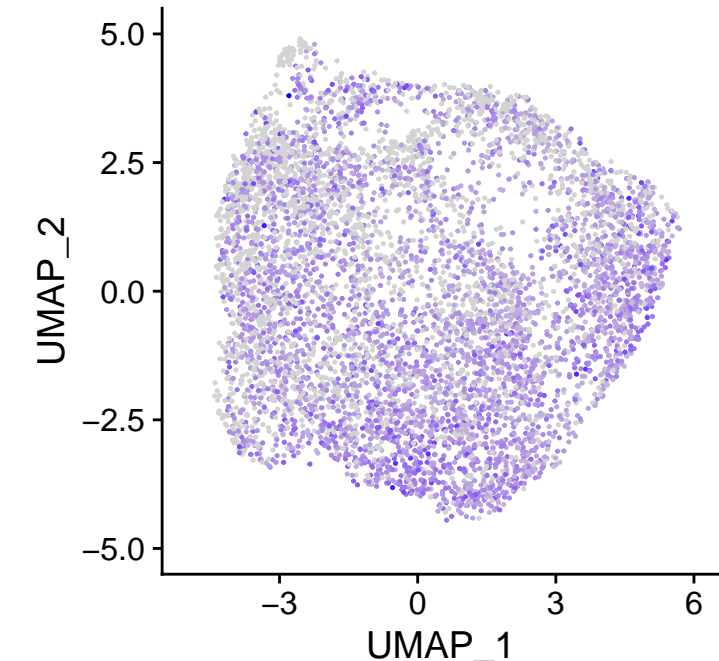



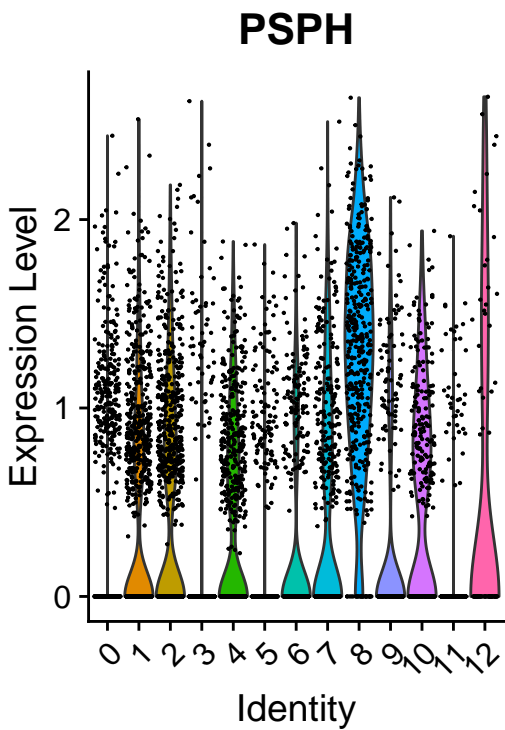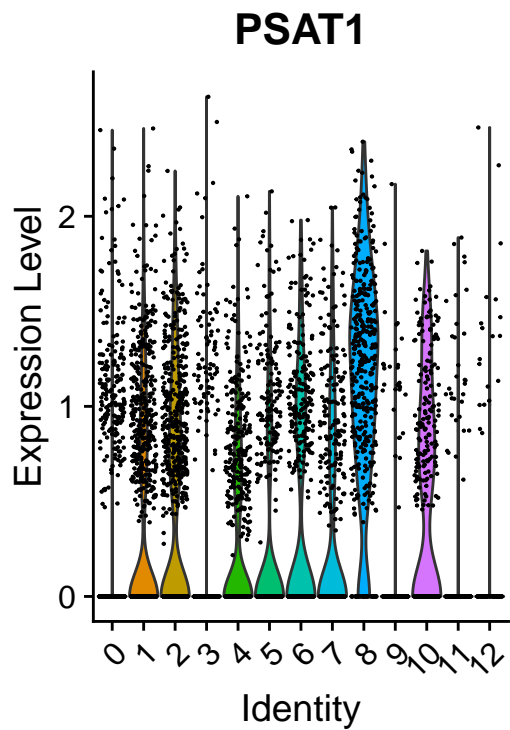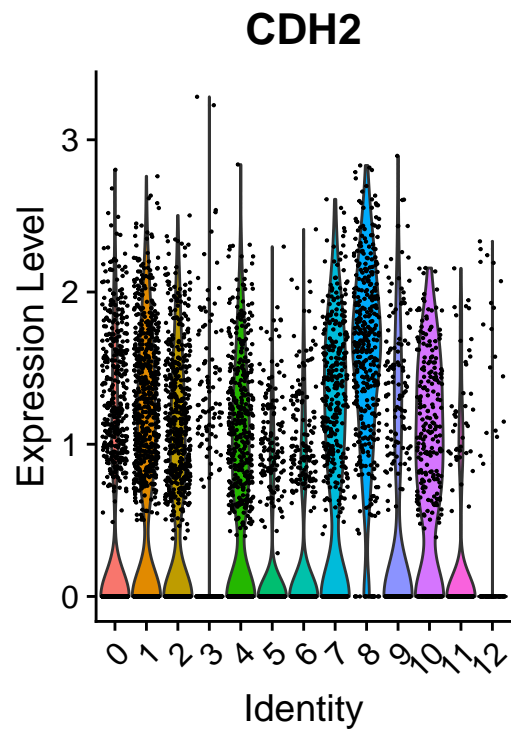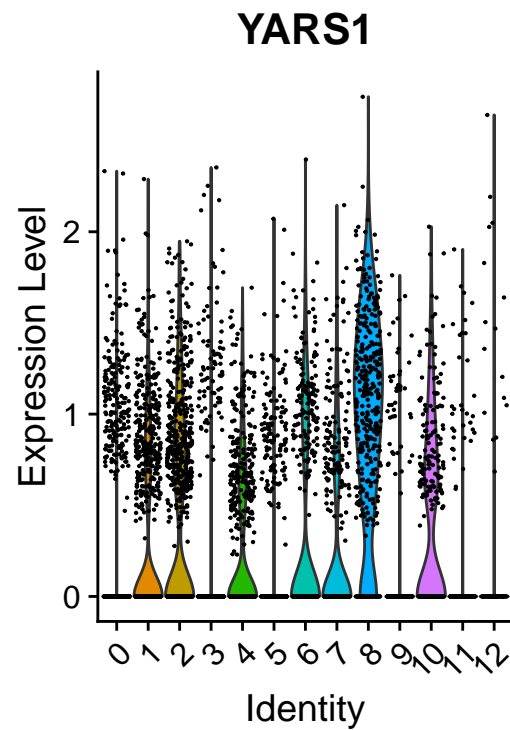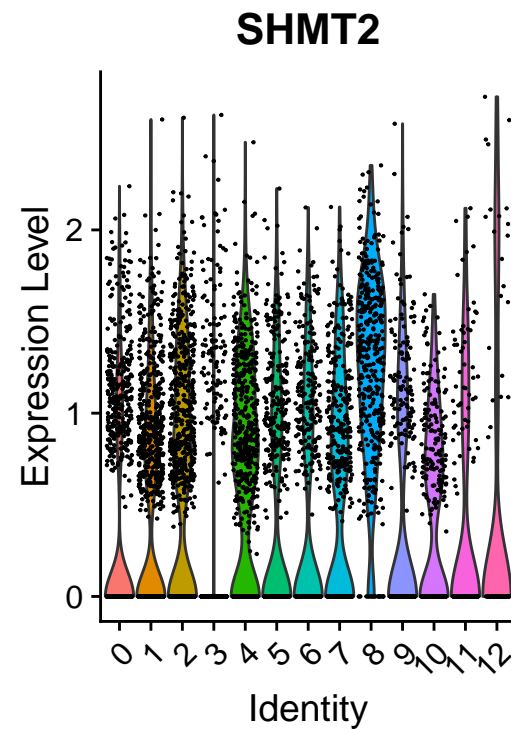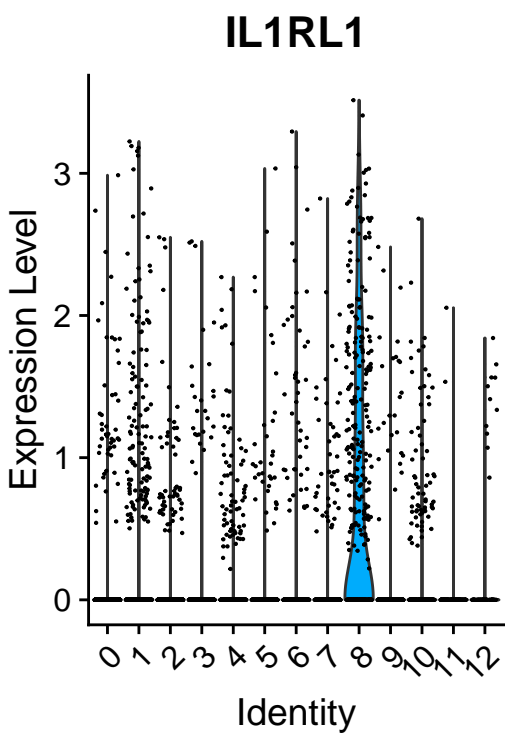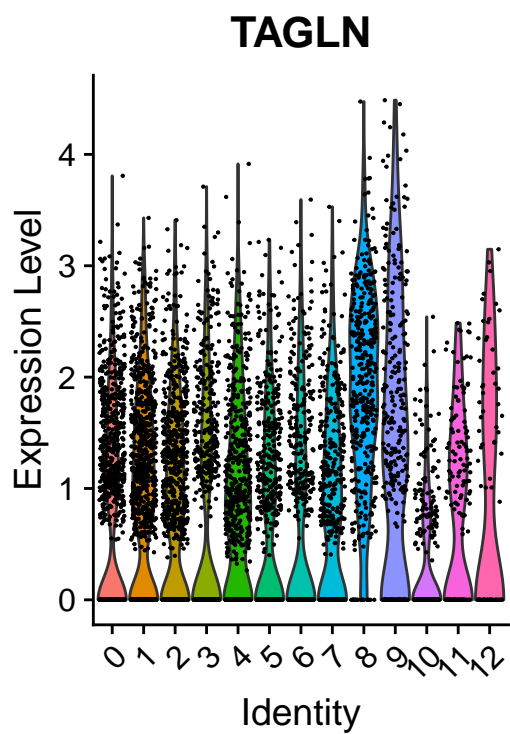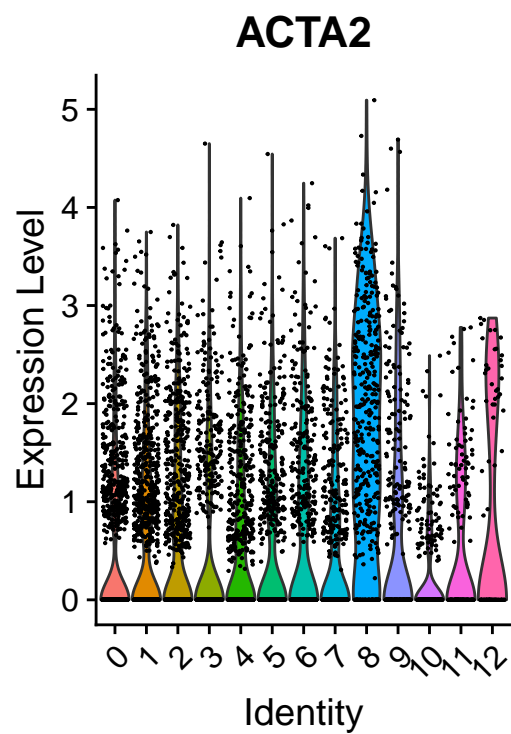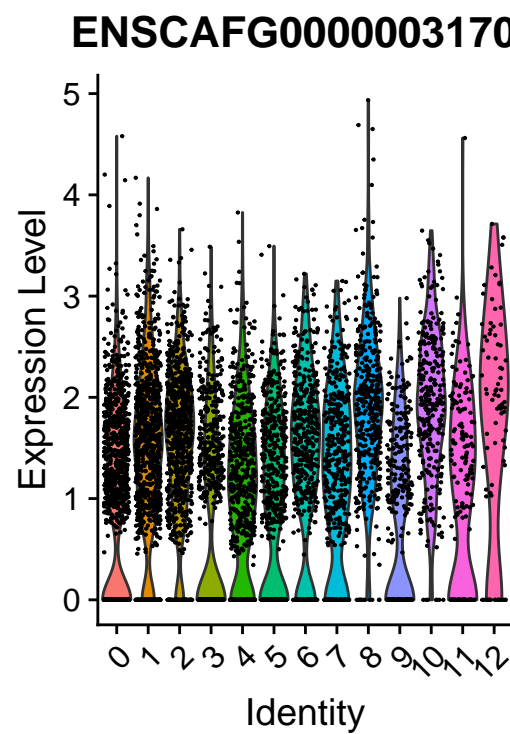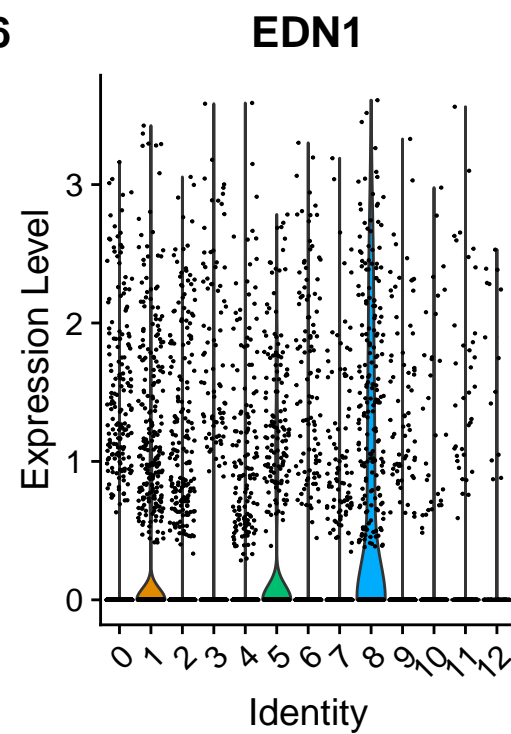



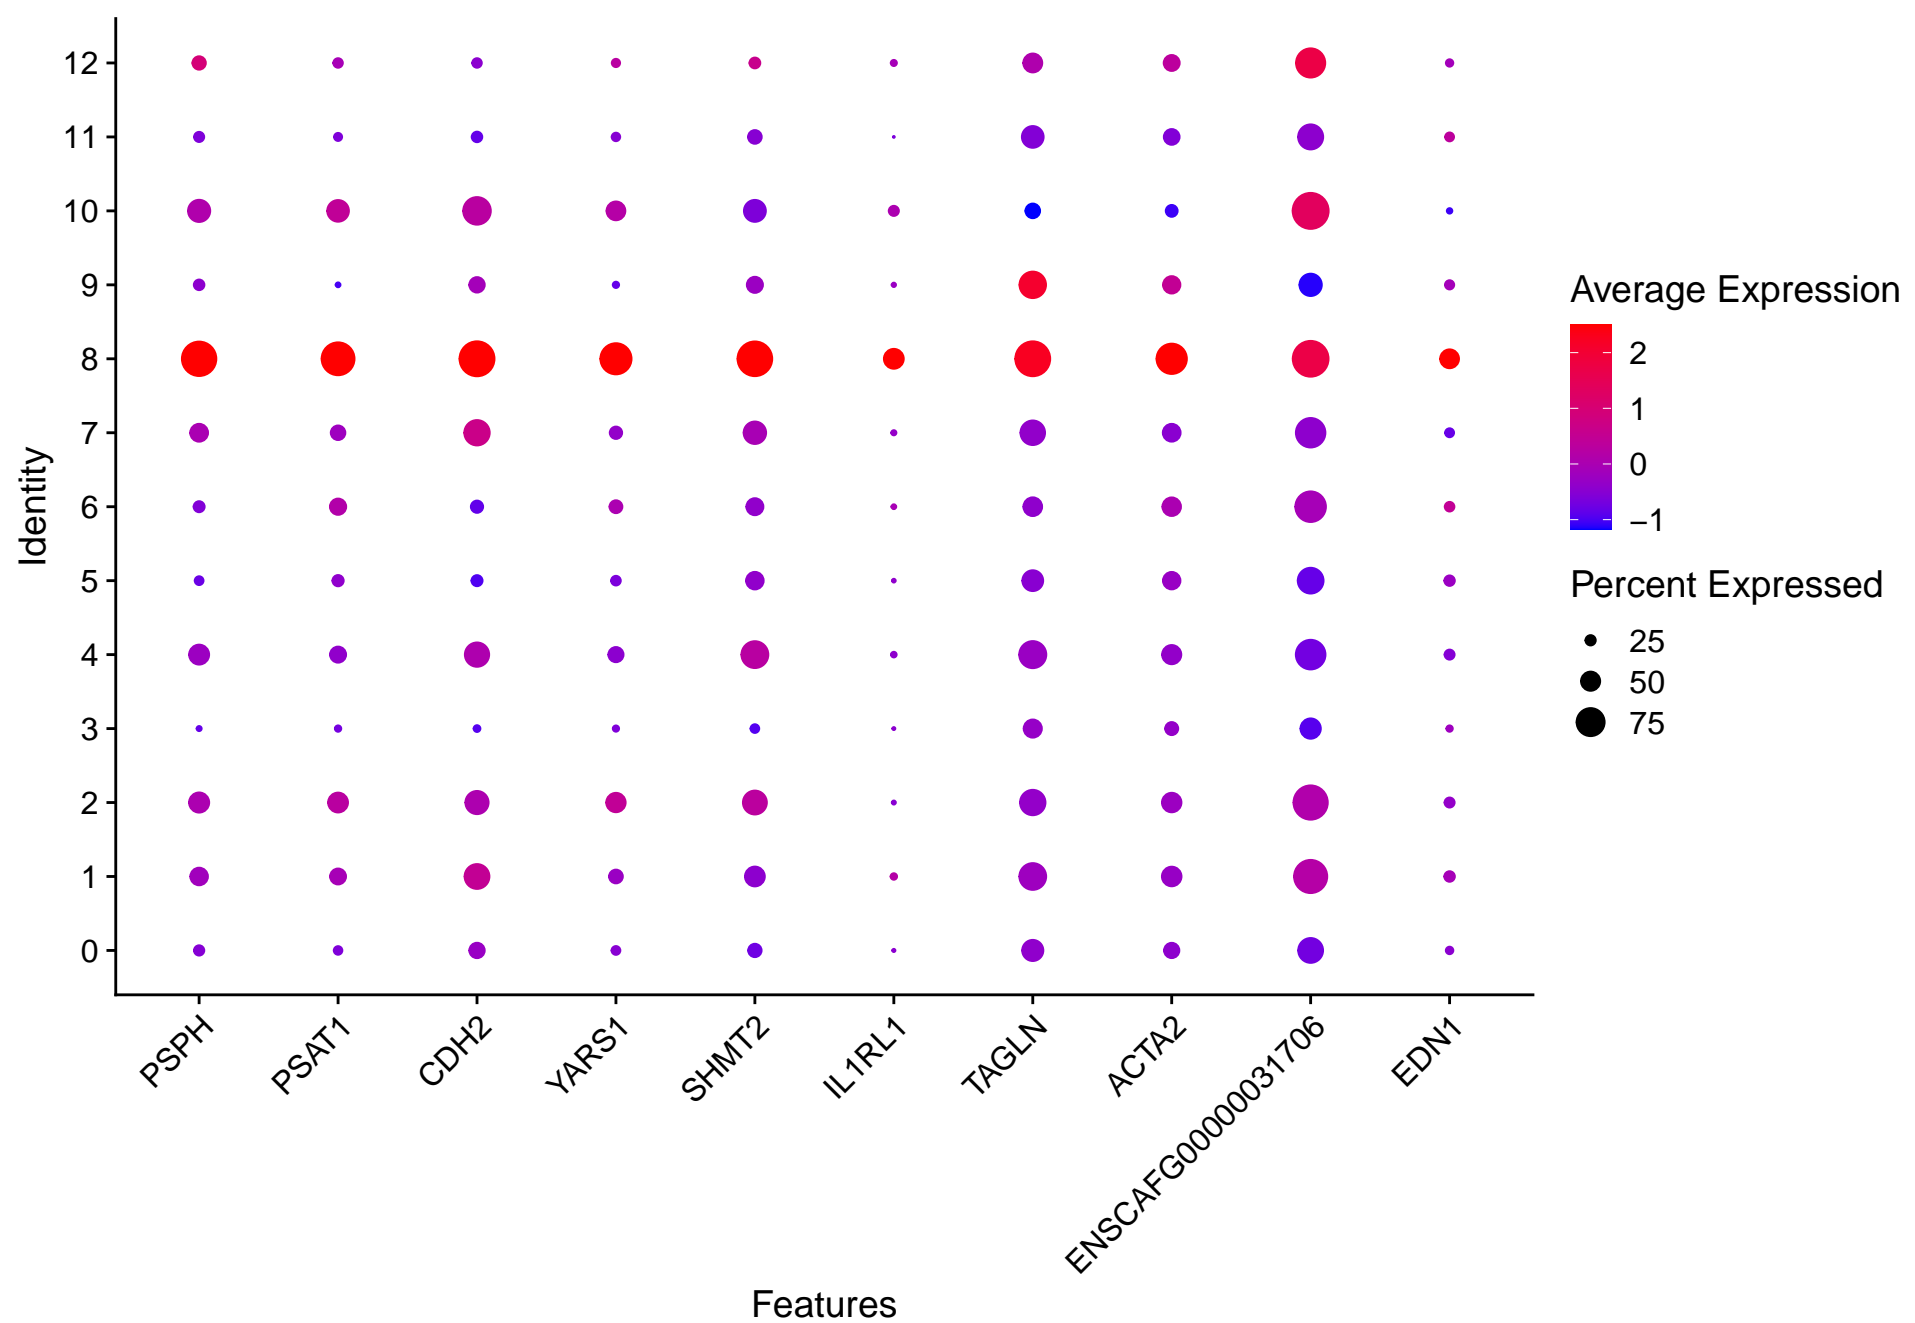

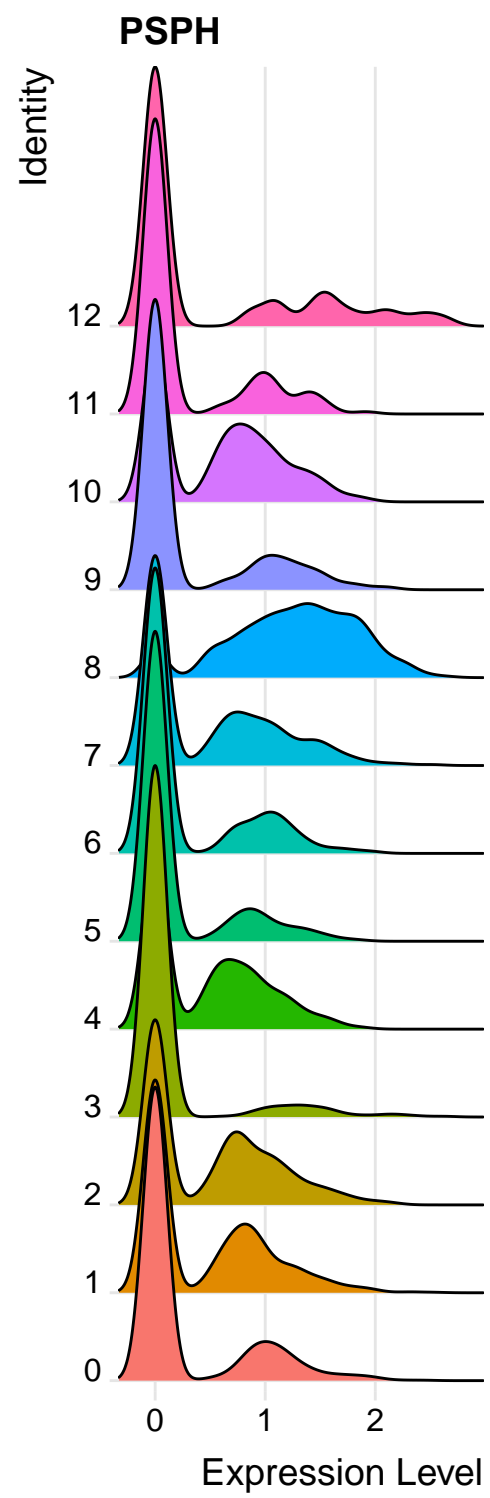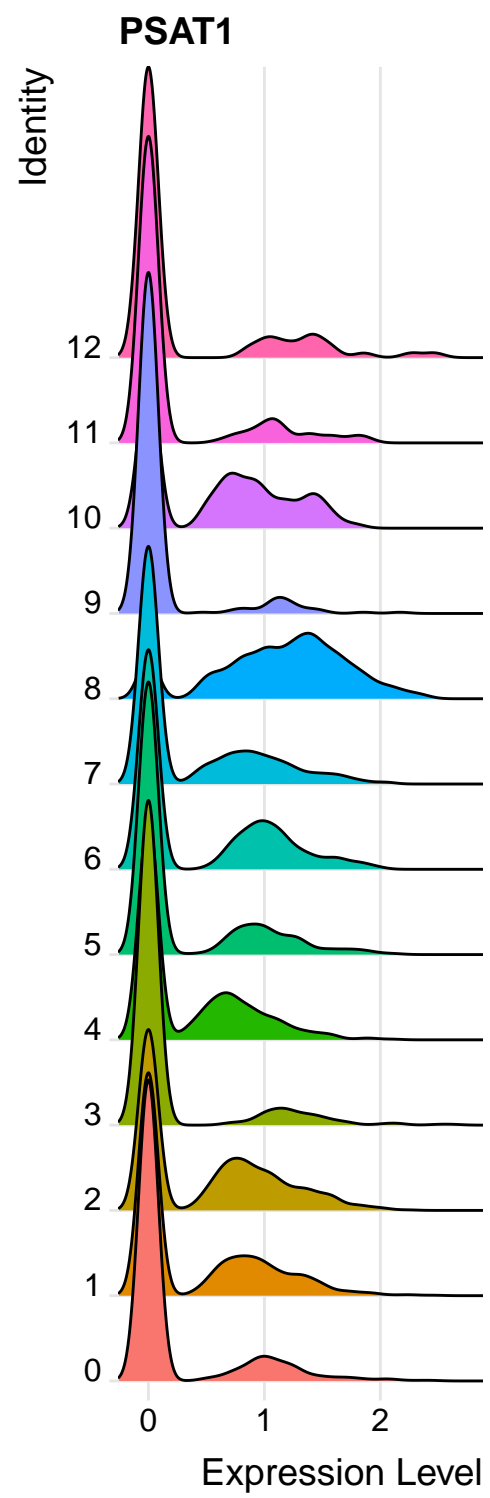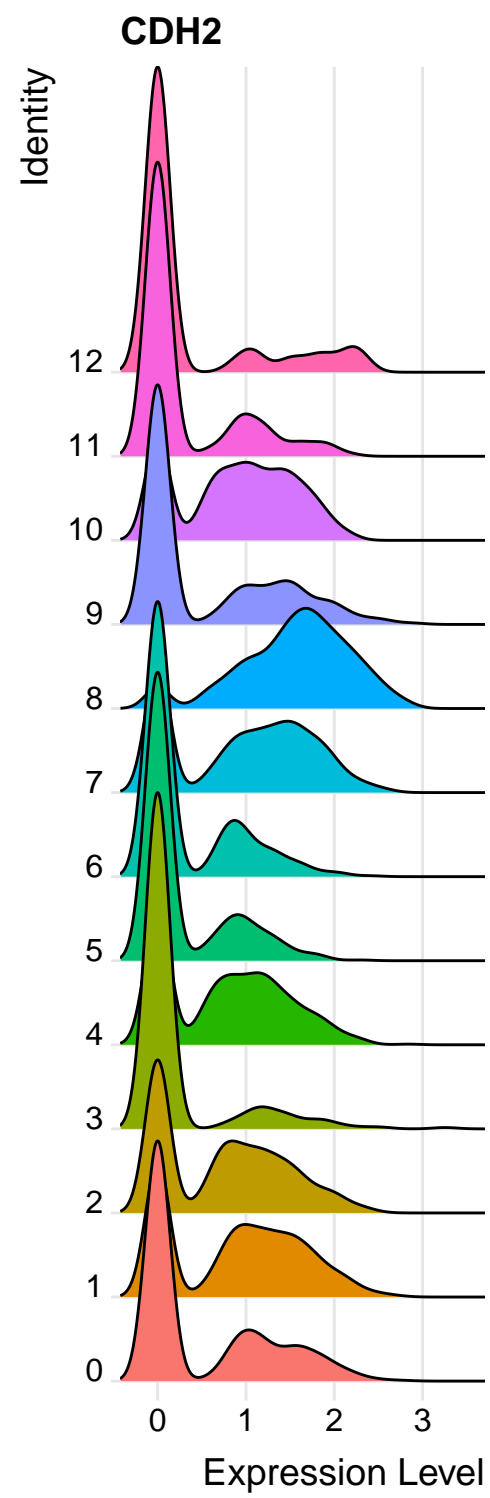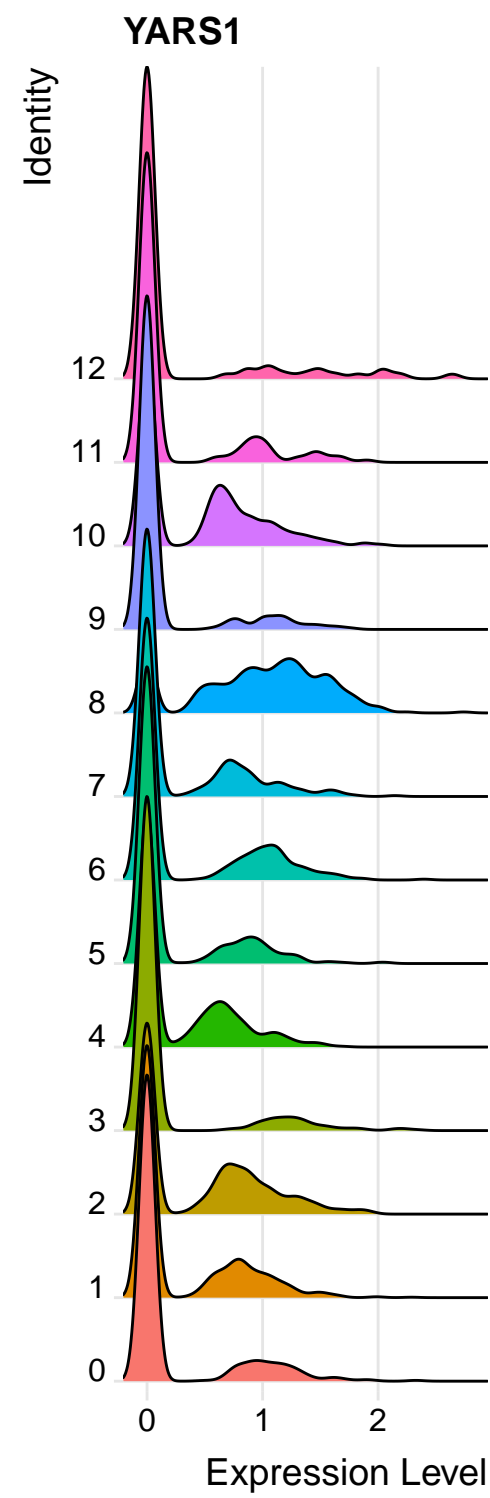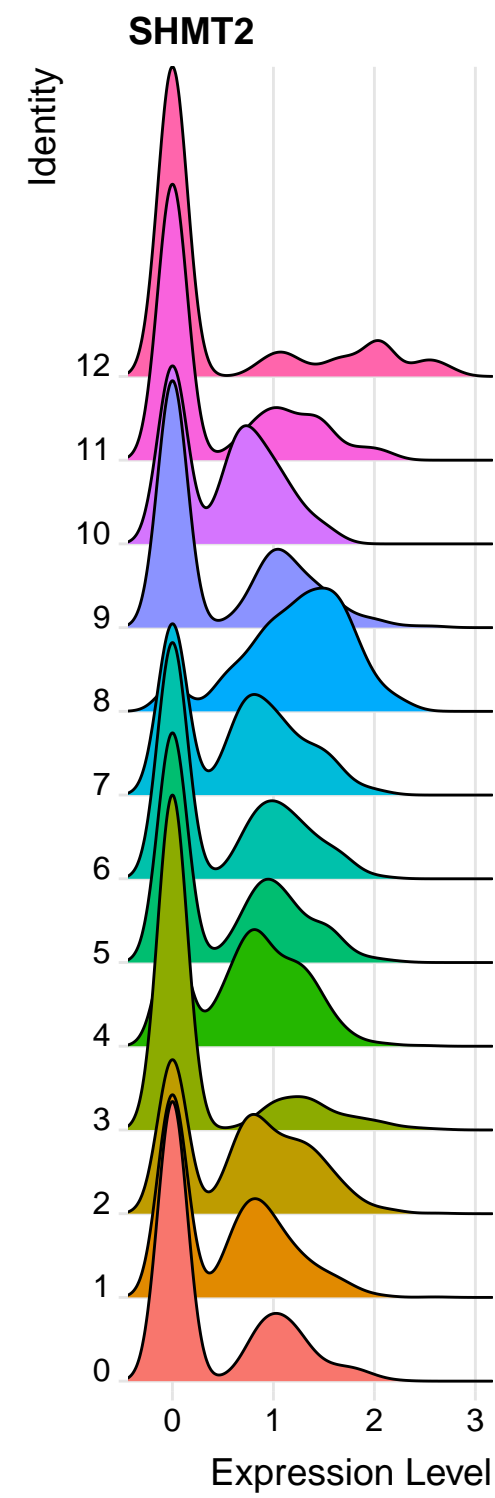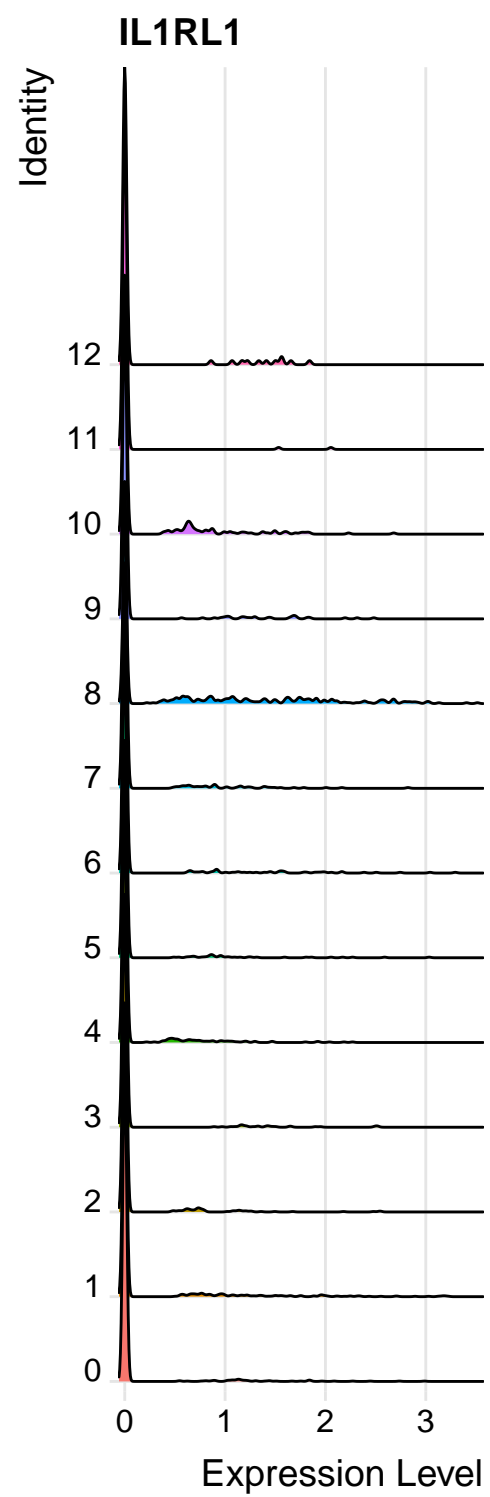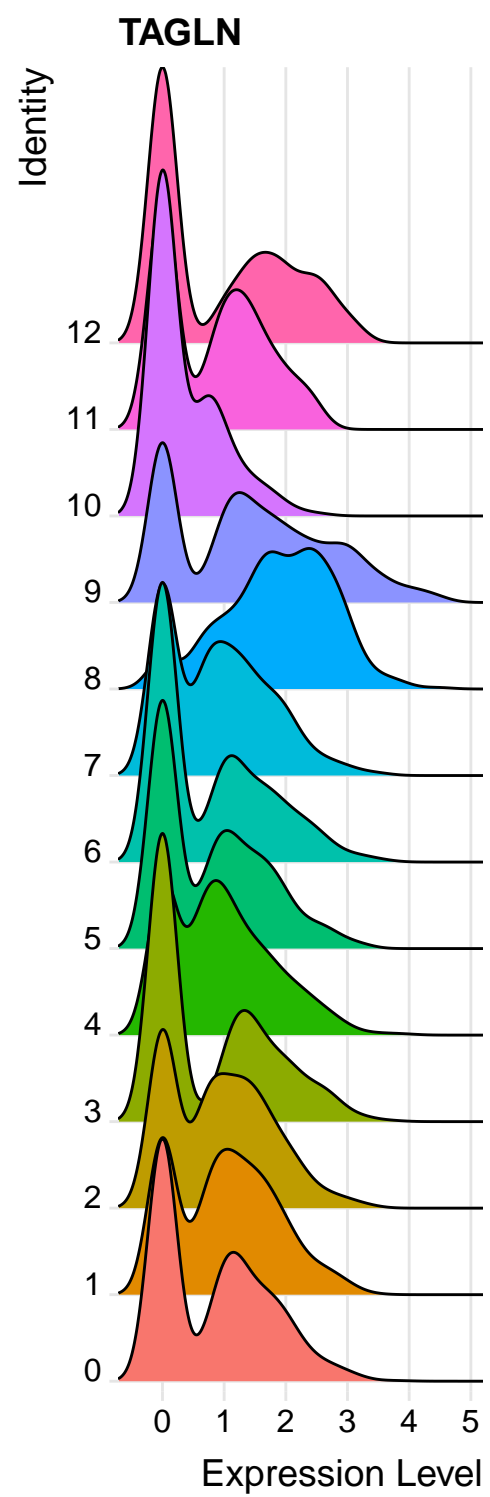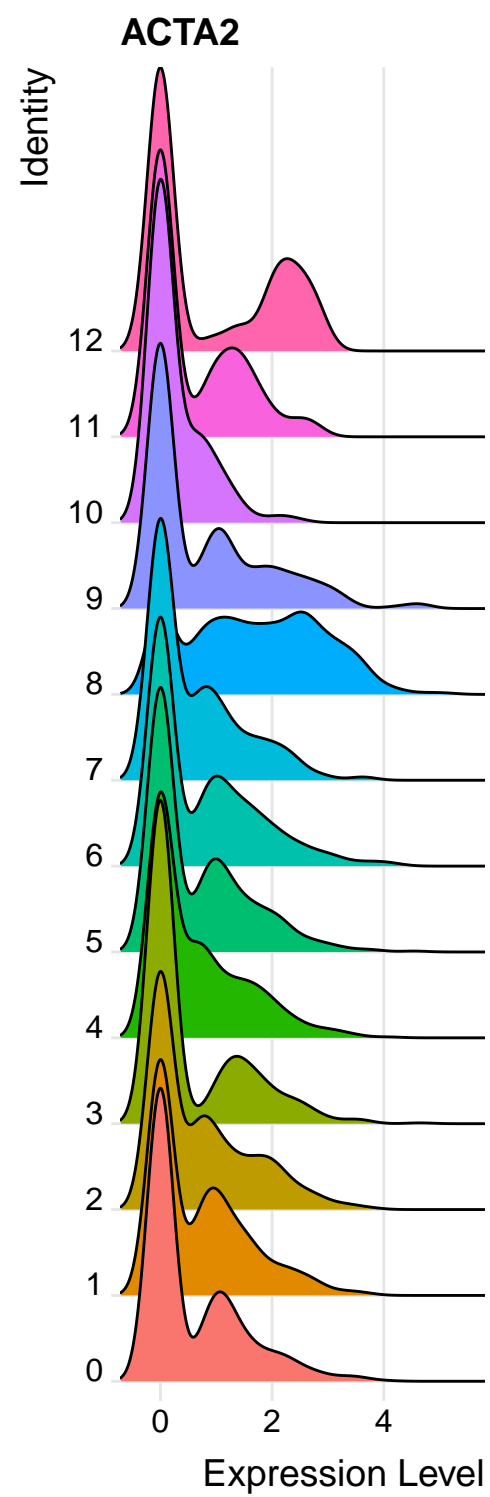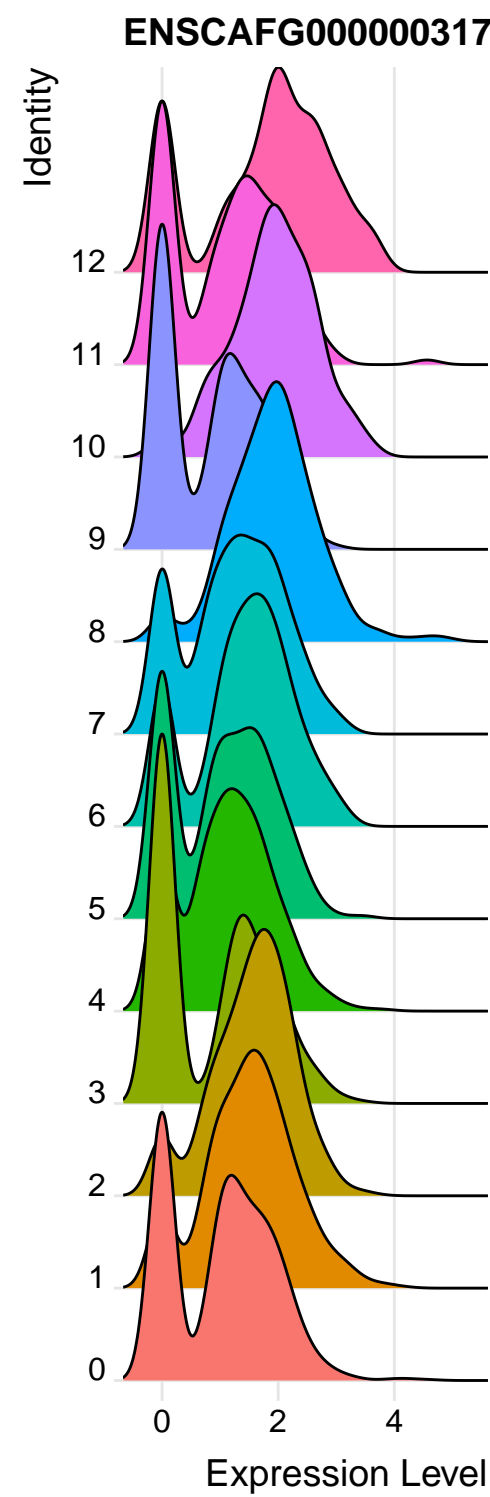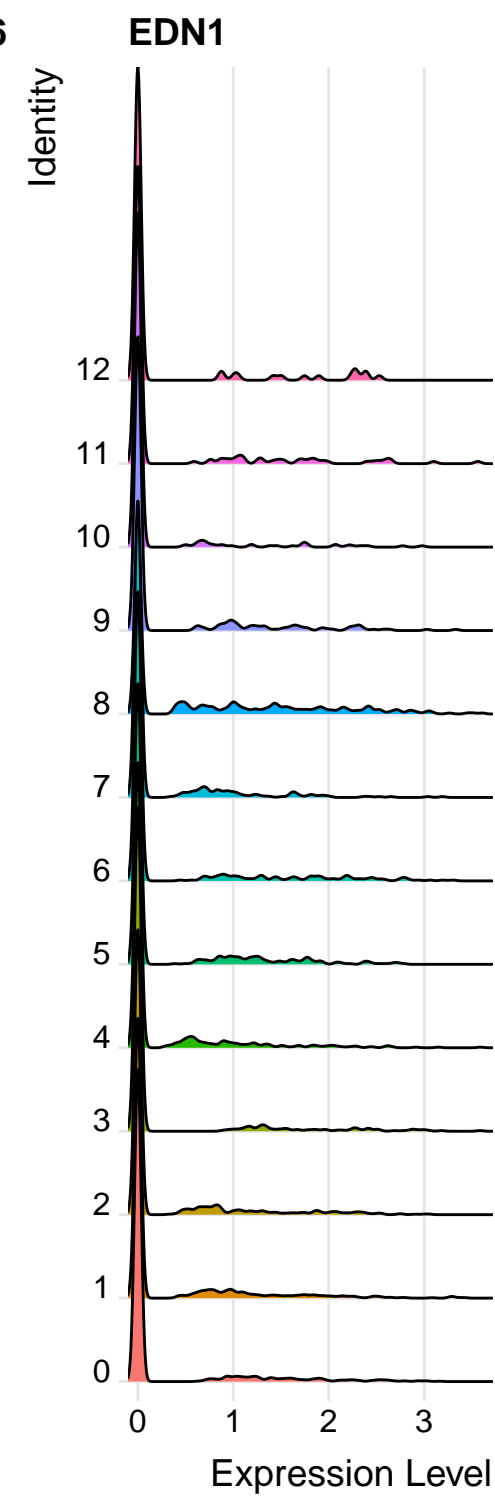

**PSPH**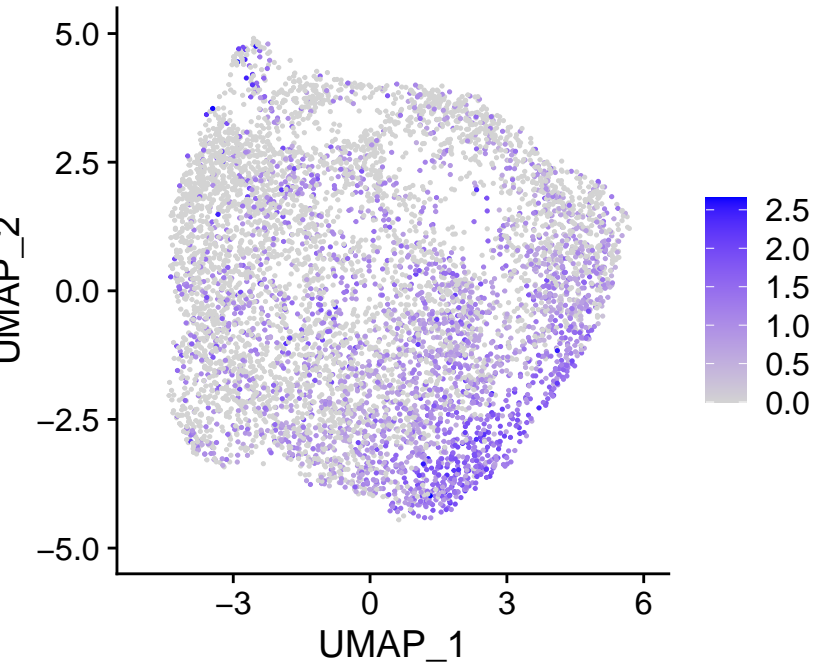**PSAT1**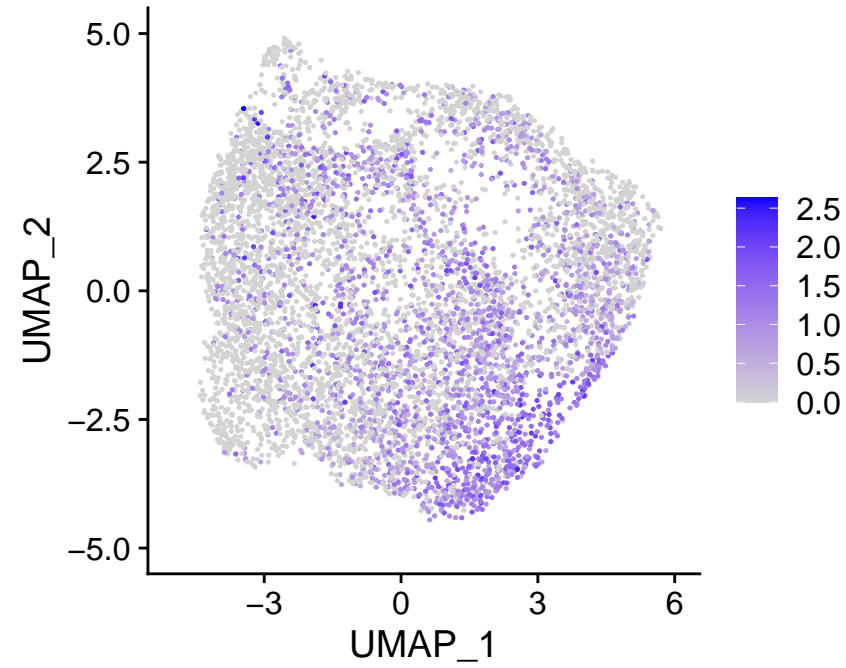**CDH2**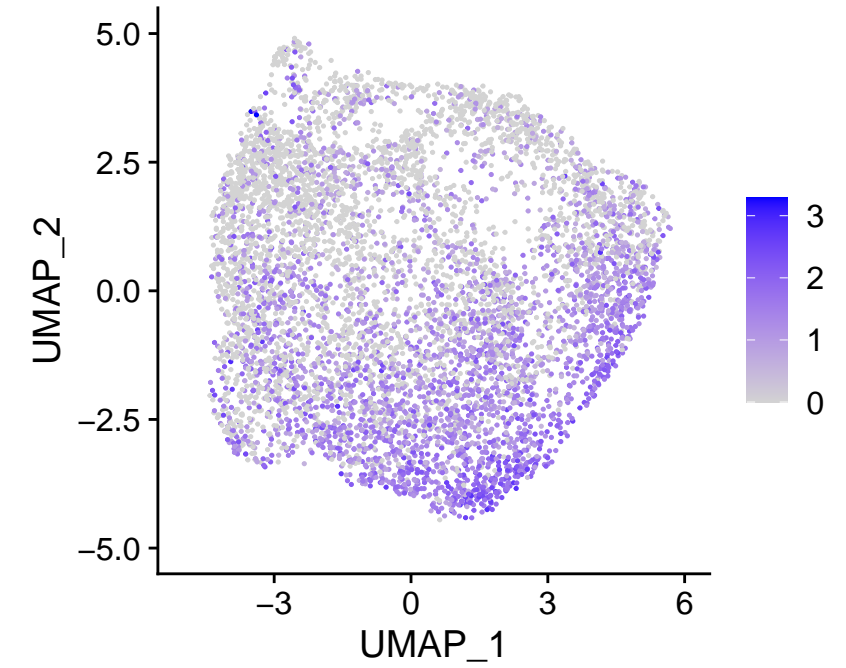**YARS1**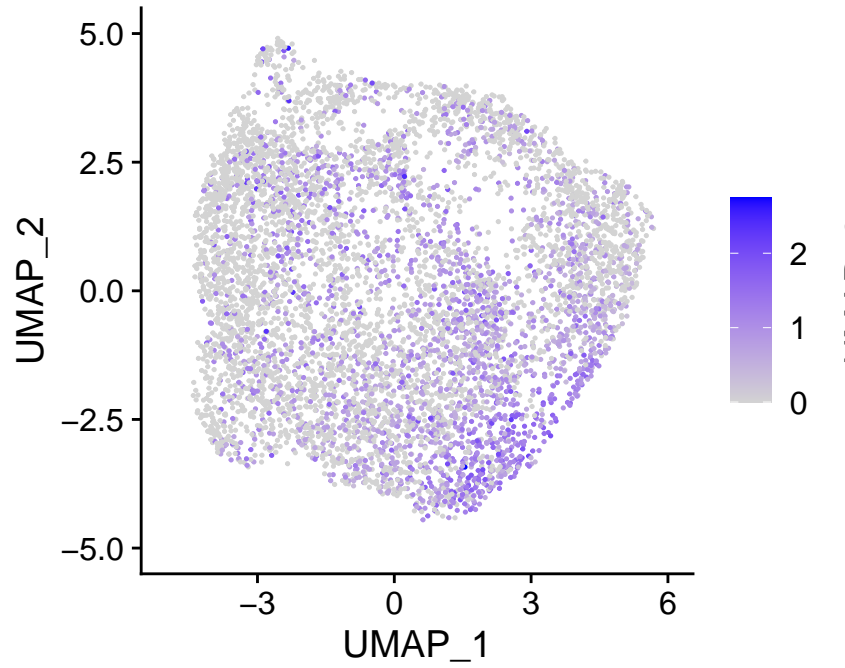**SHMT2**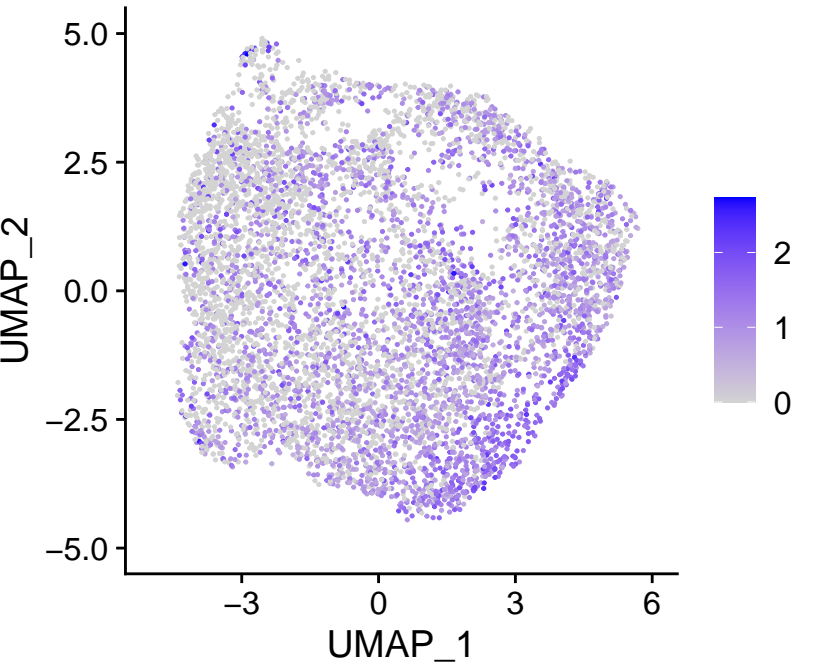**IL1RL1**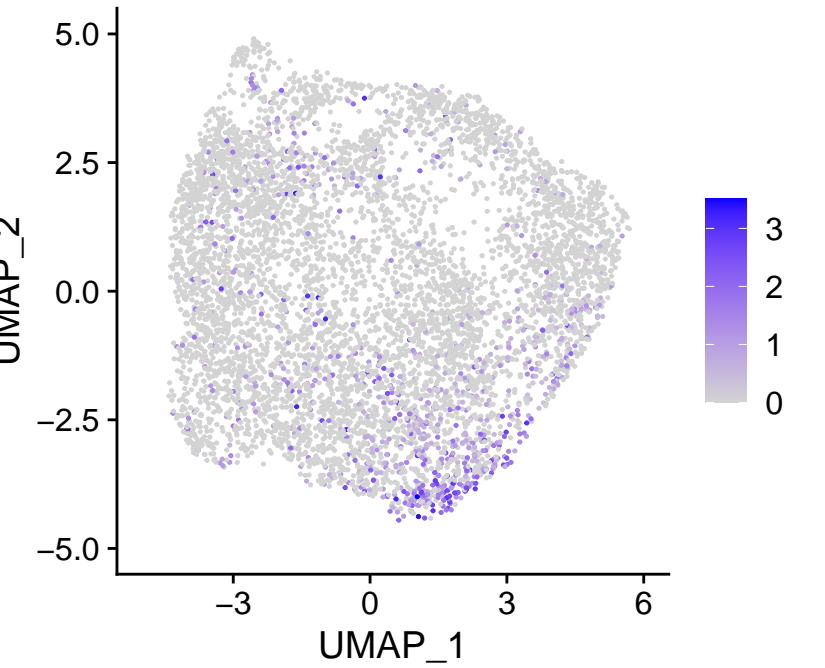**TAGLN**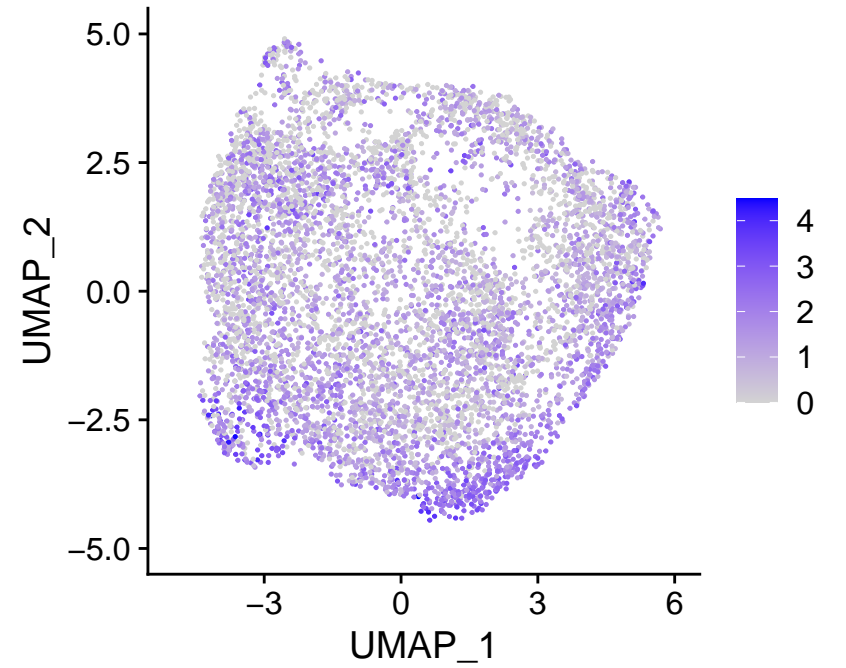**ACTA2**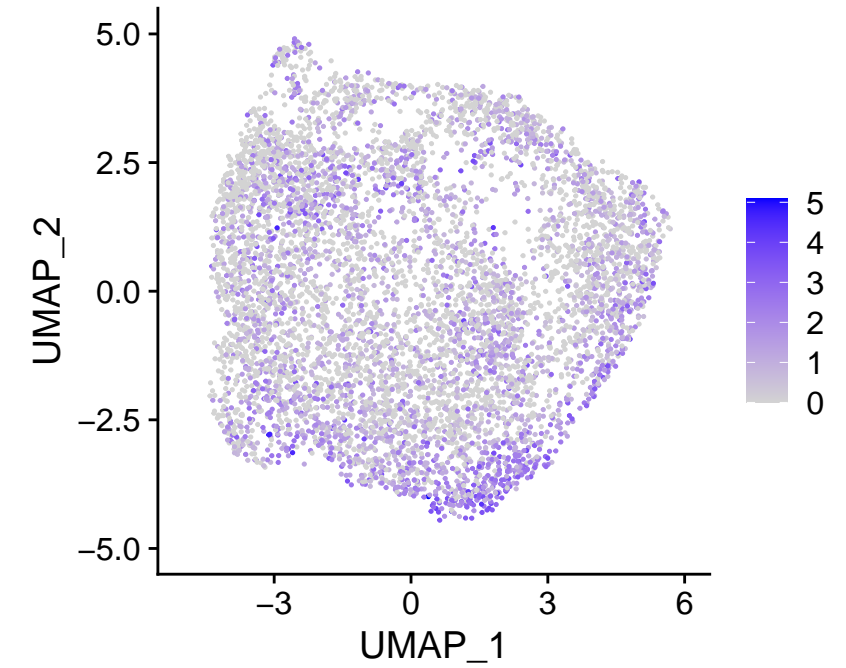**ENSCAFG00000031706**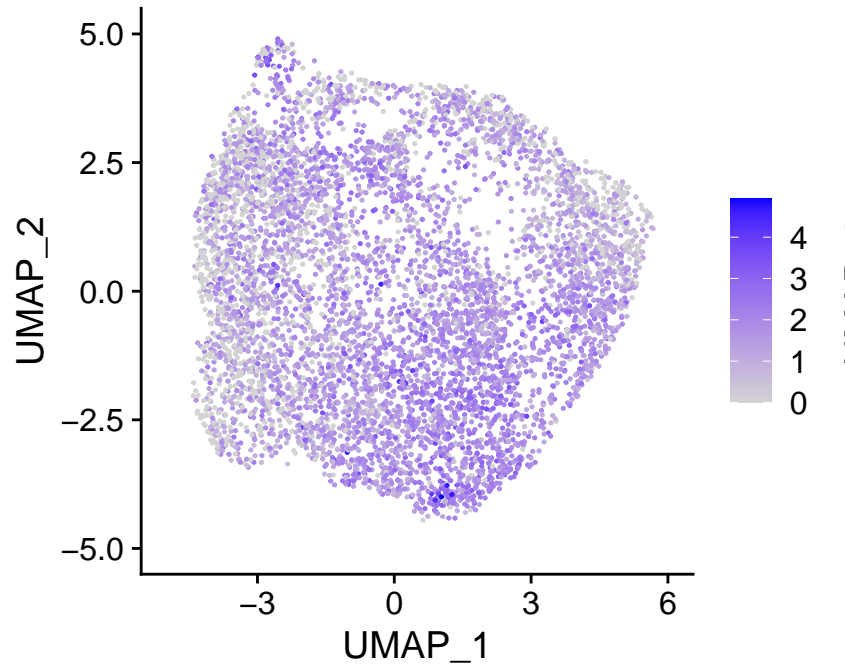**EDN1**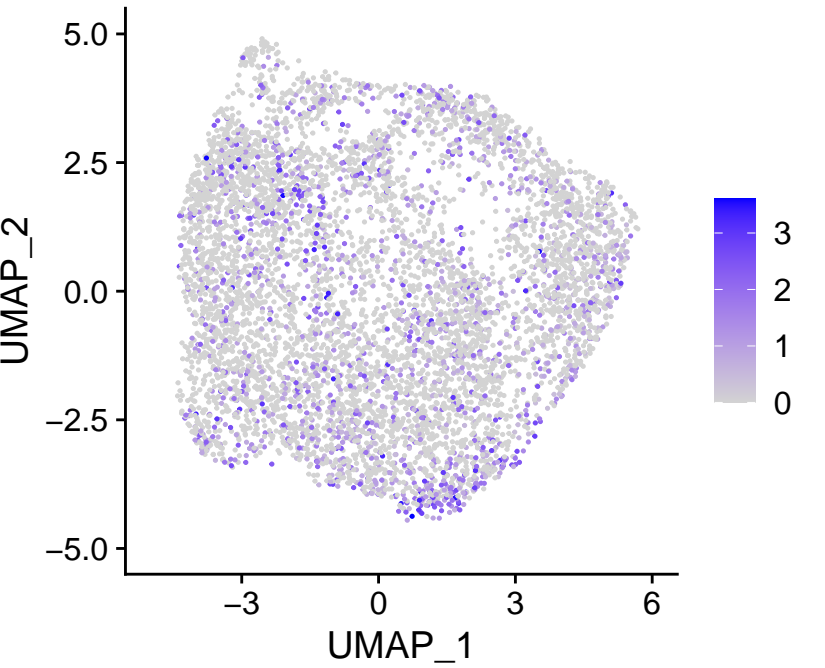



**ANKRD37**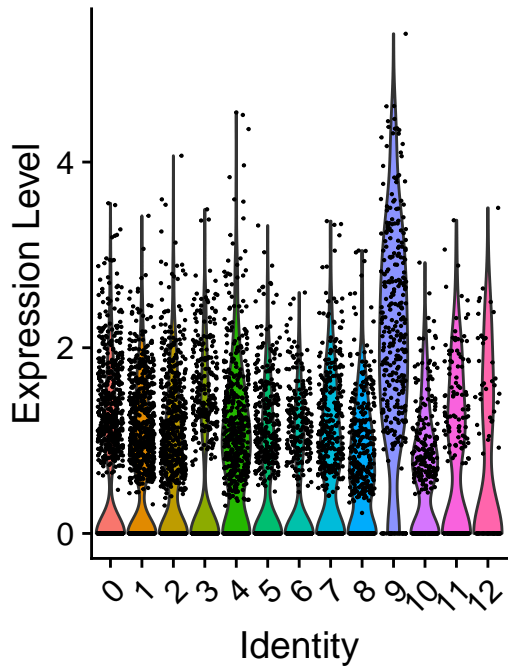**BNIP3**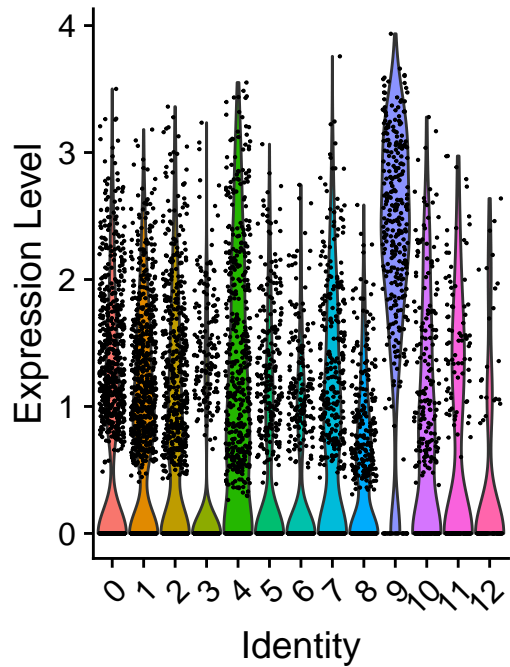**DDIT4**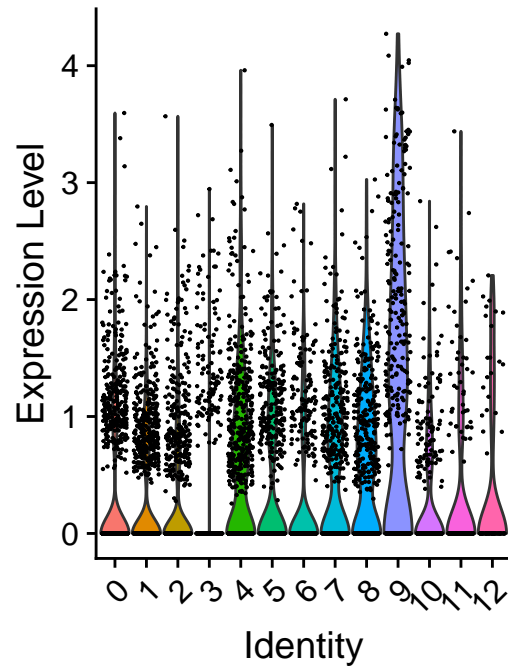**BCL2A1**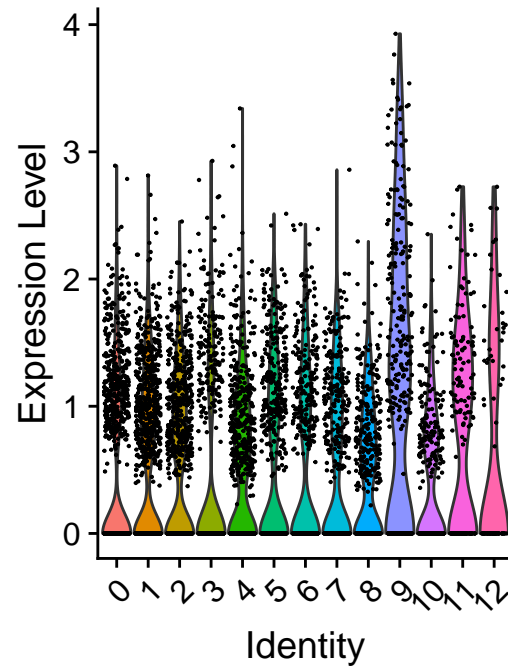**NDUFA4L2**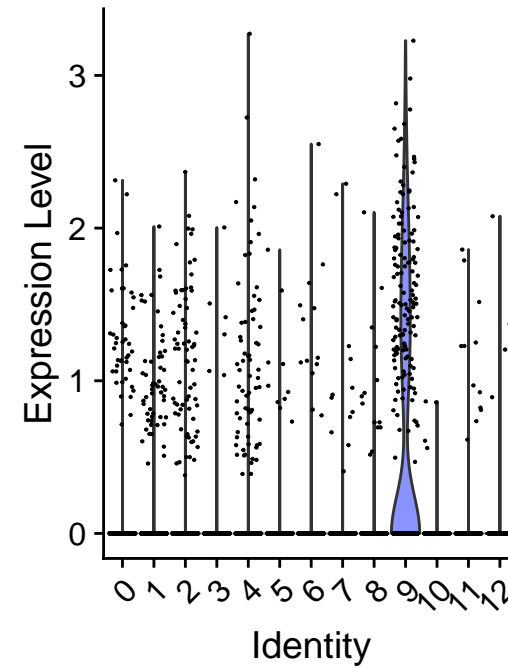**CA9**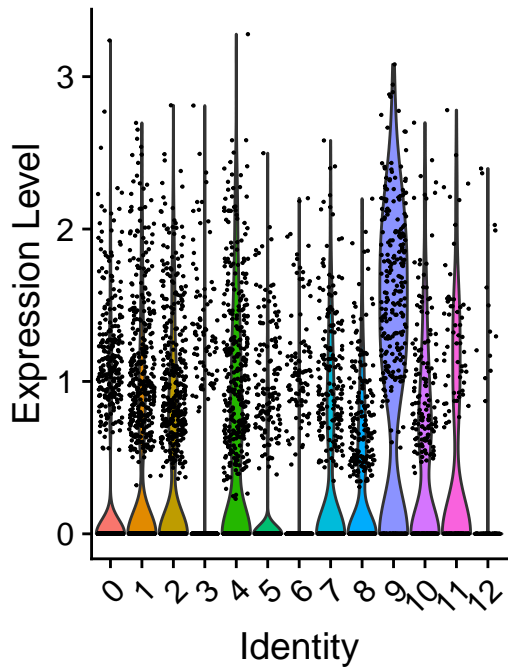**ADM**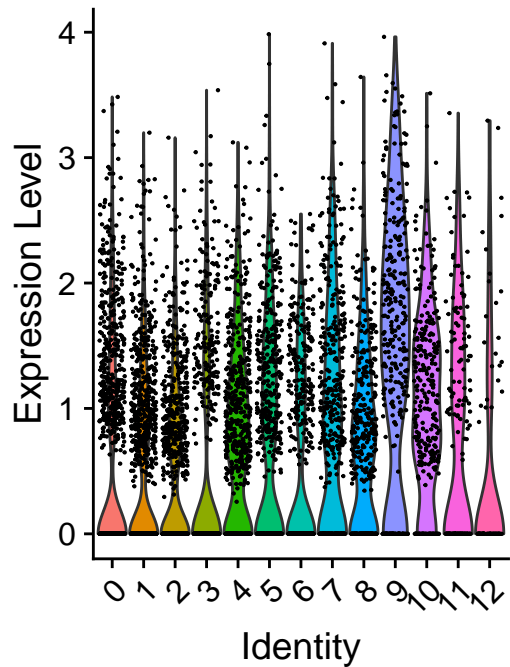**SERPINE1**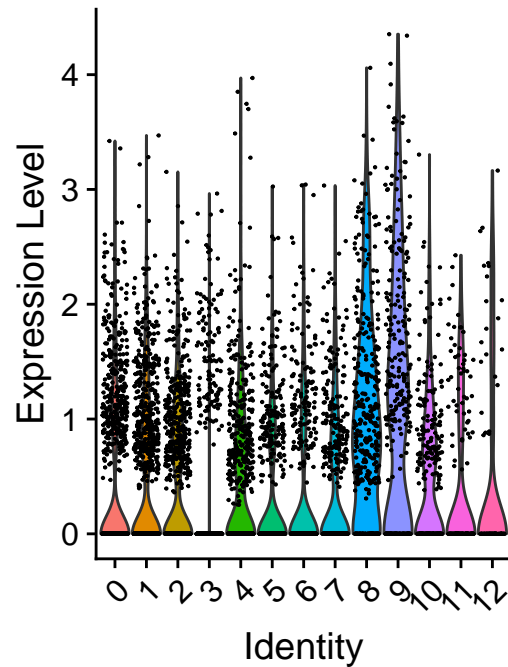**SLC2A1**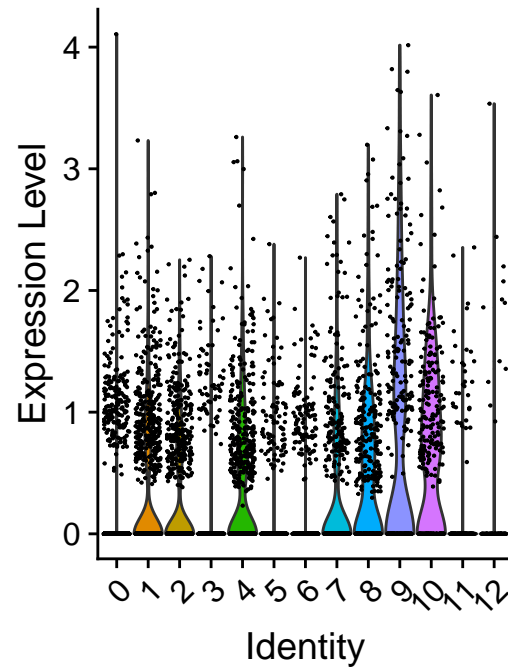**TAGLN**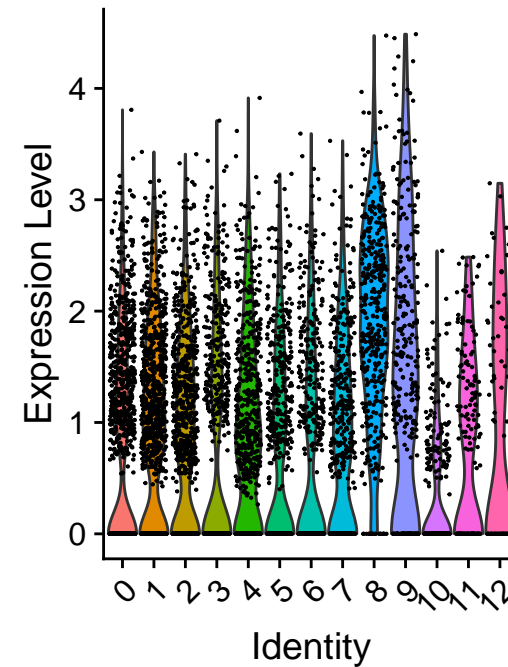

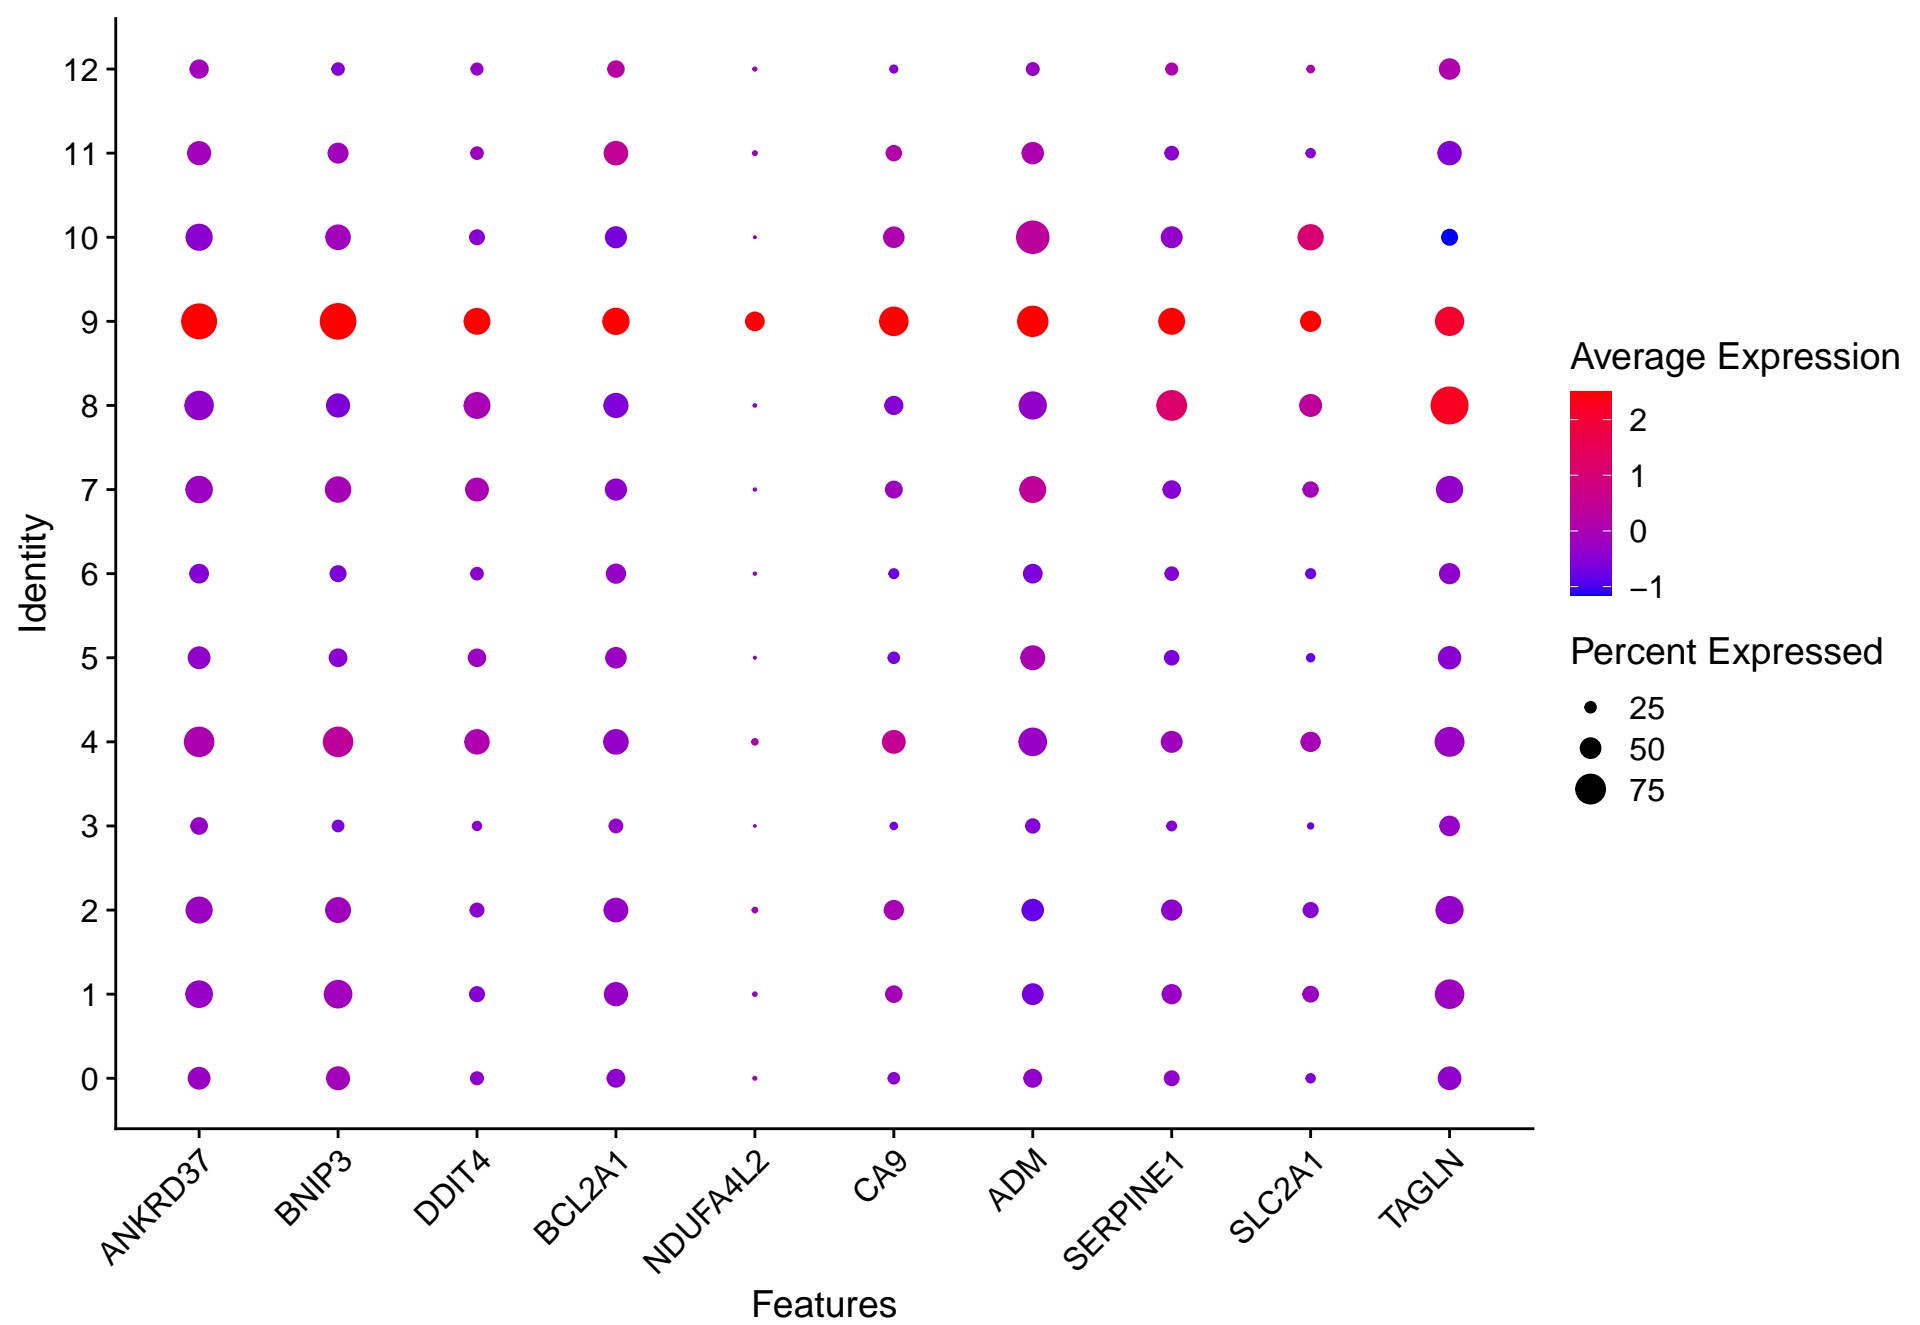

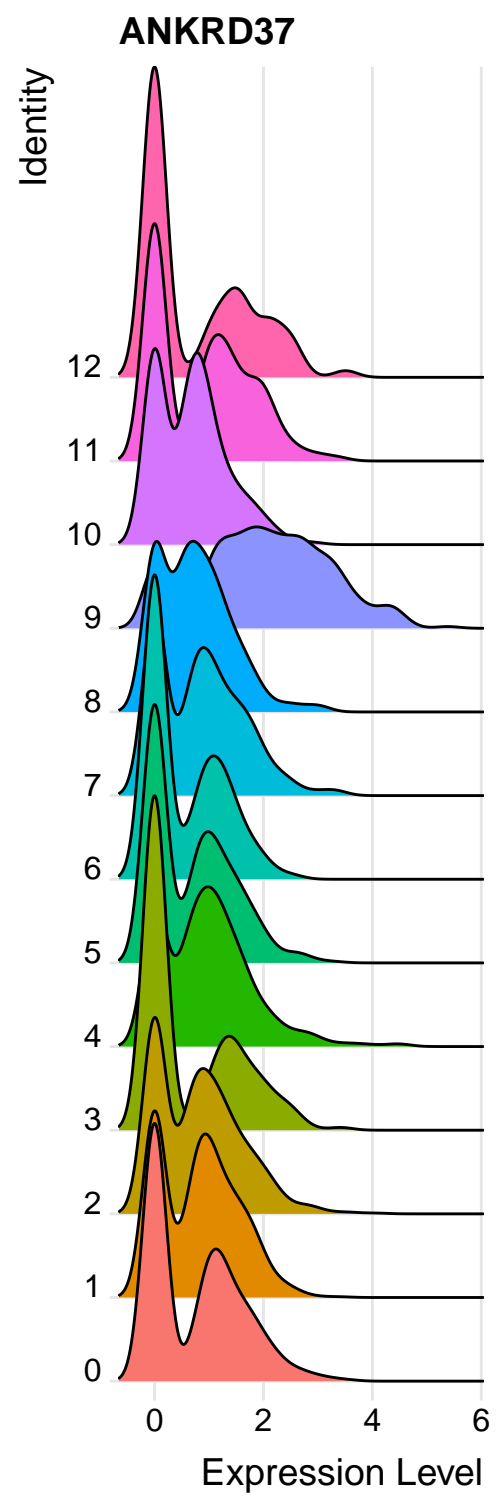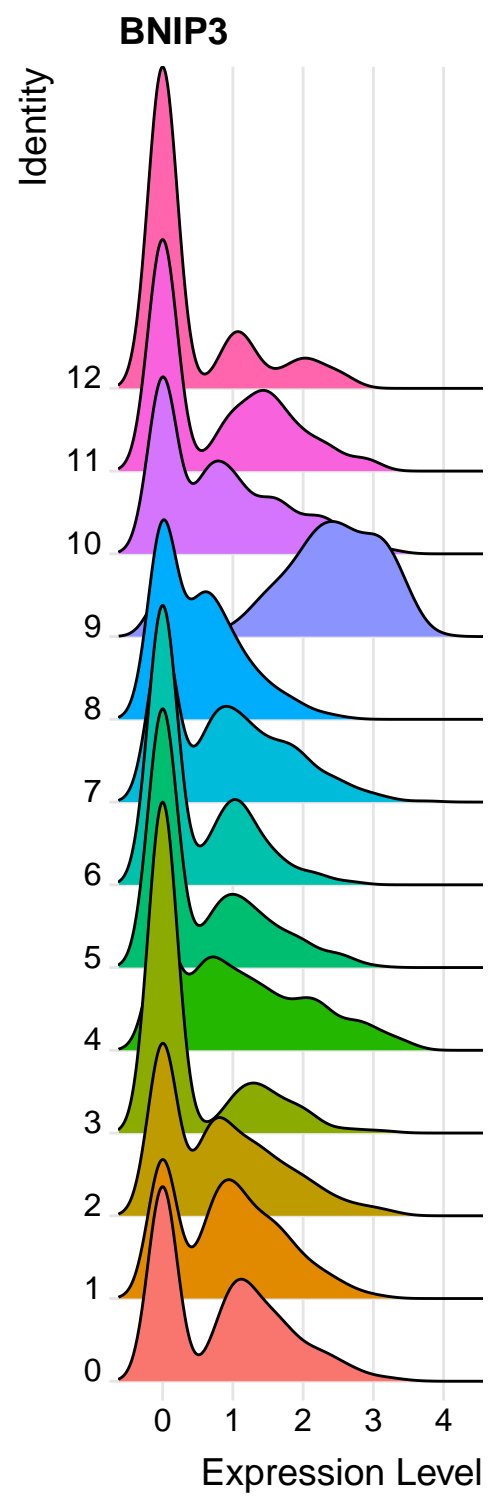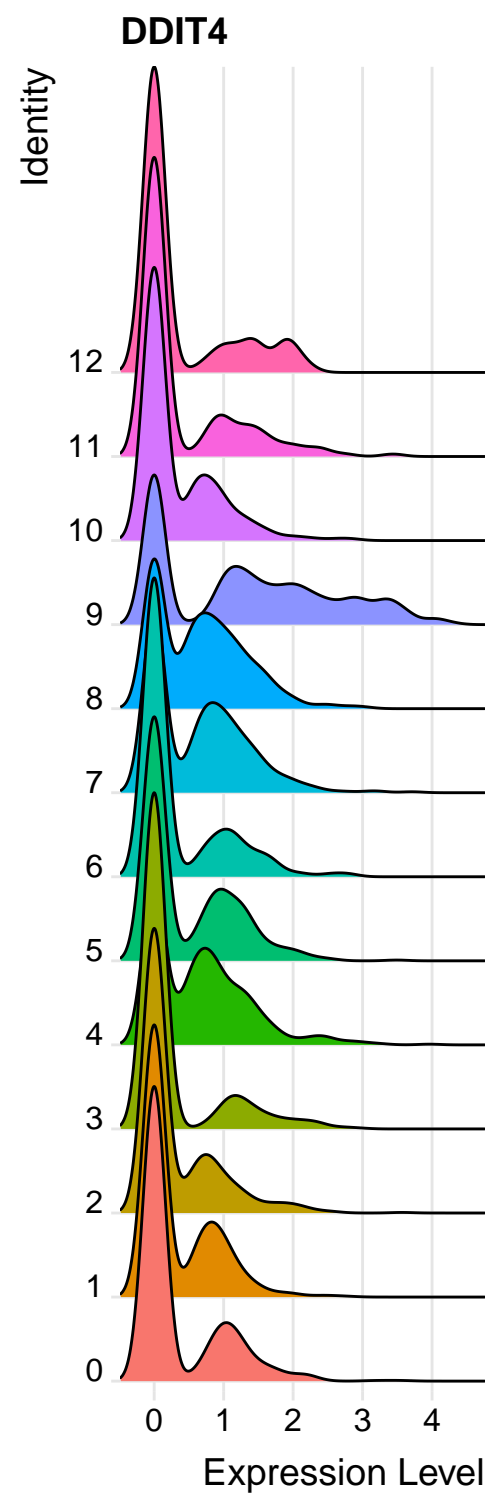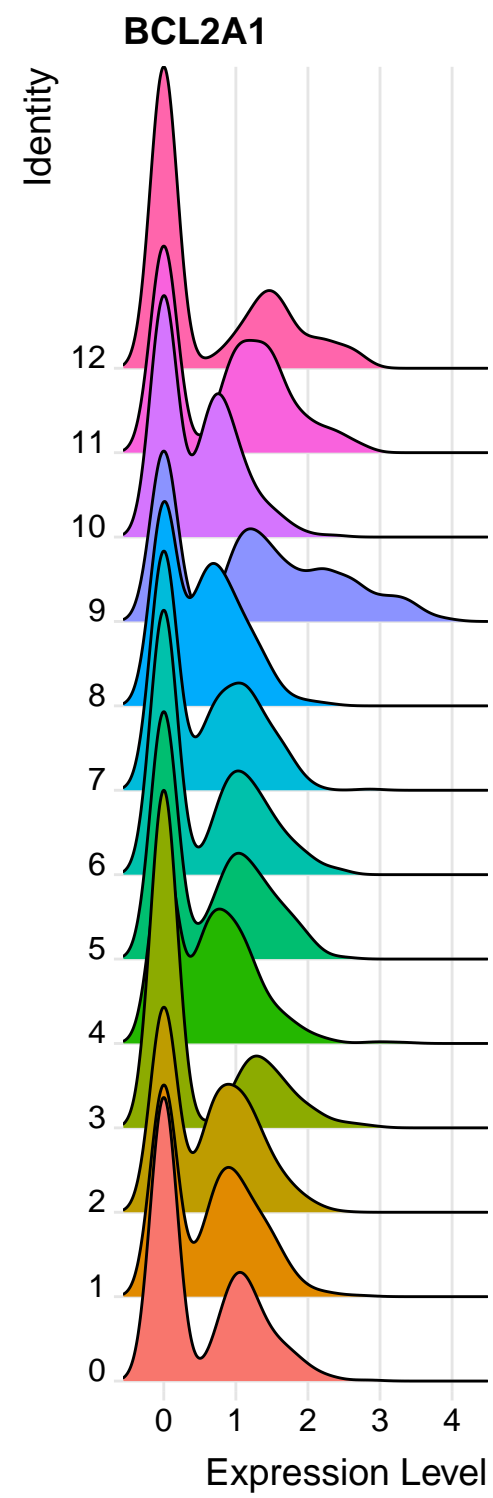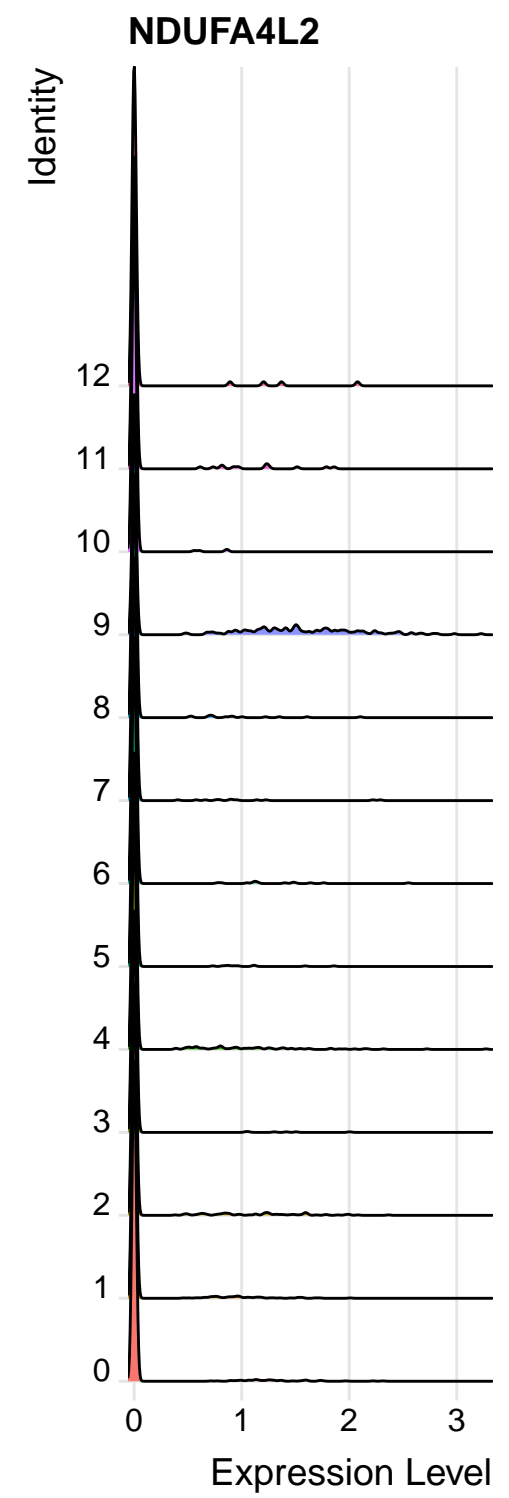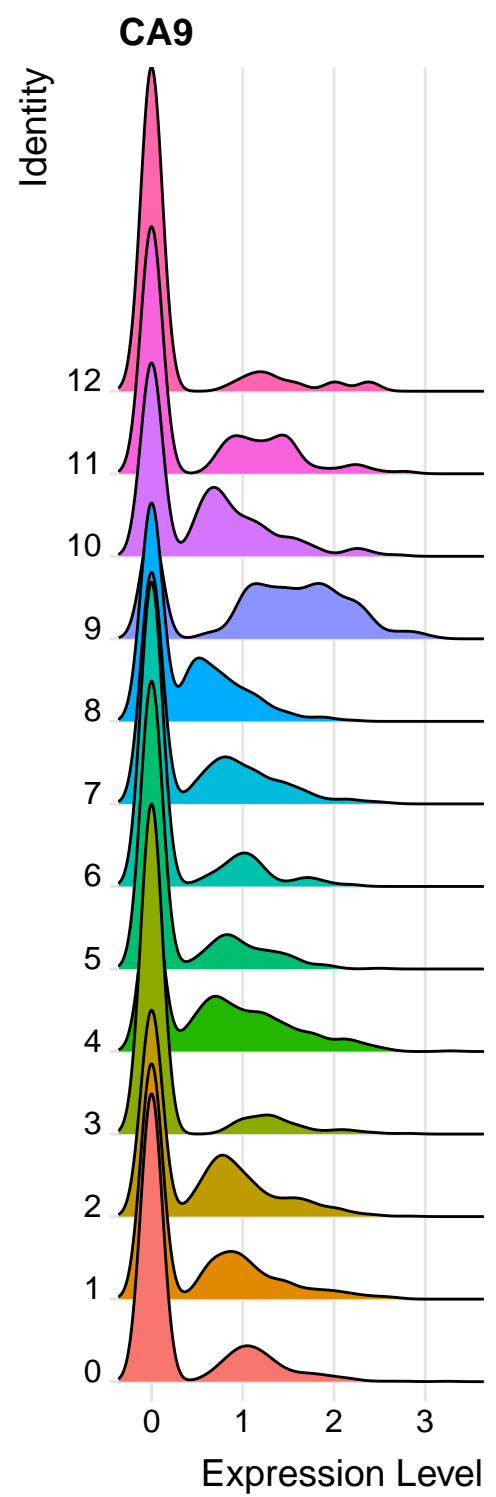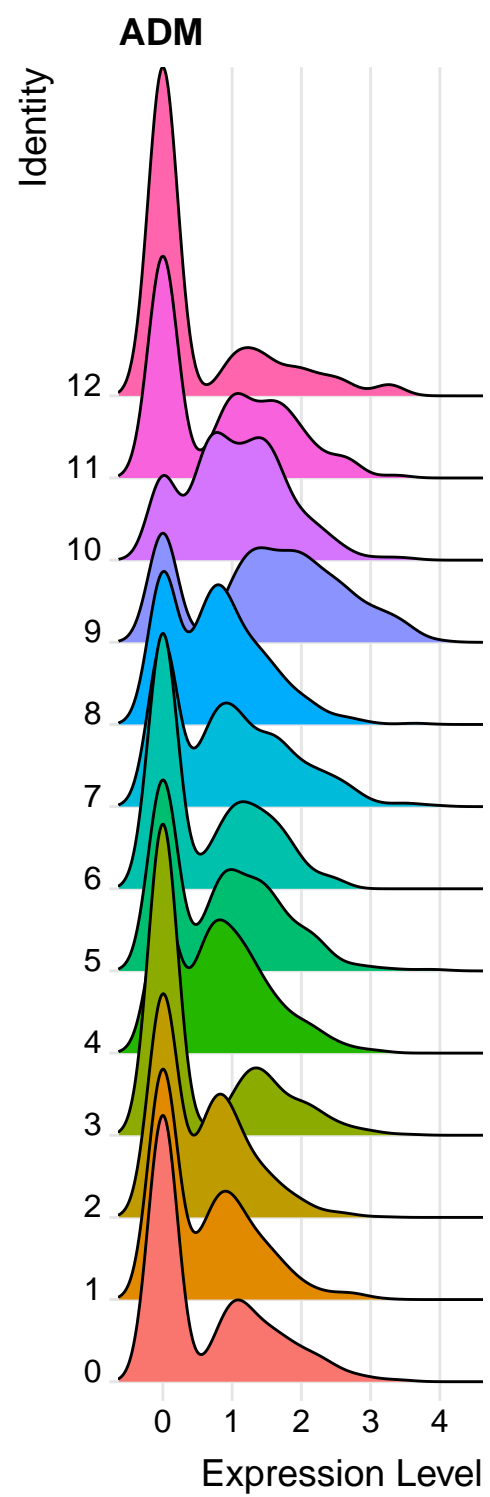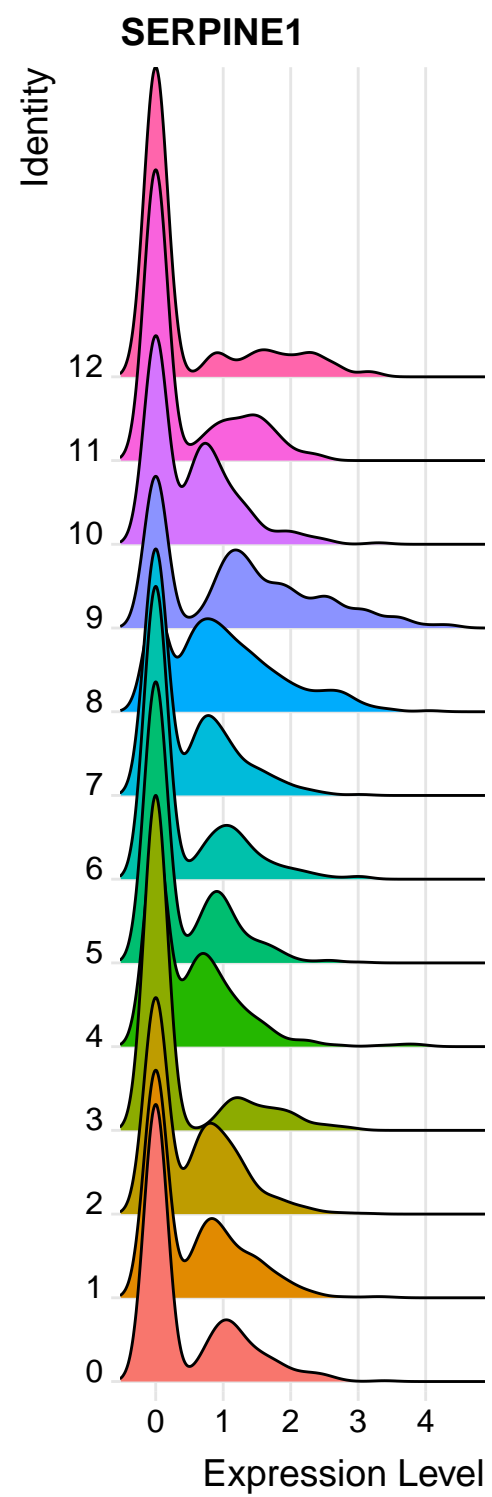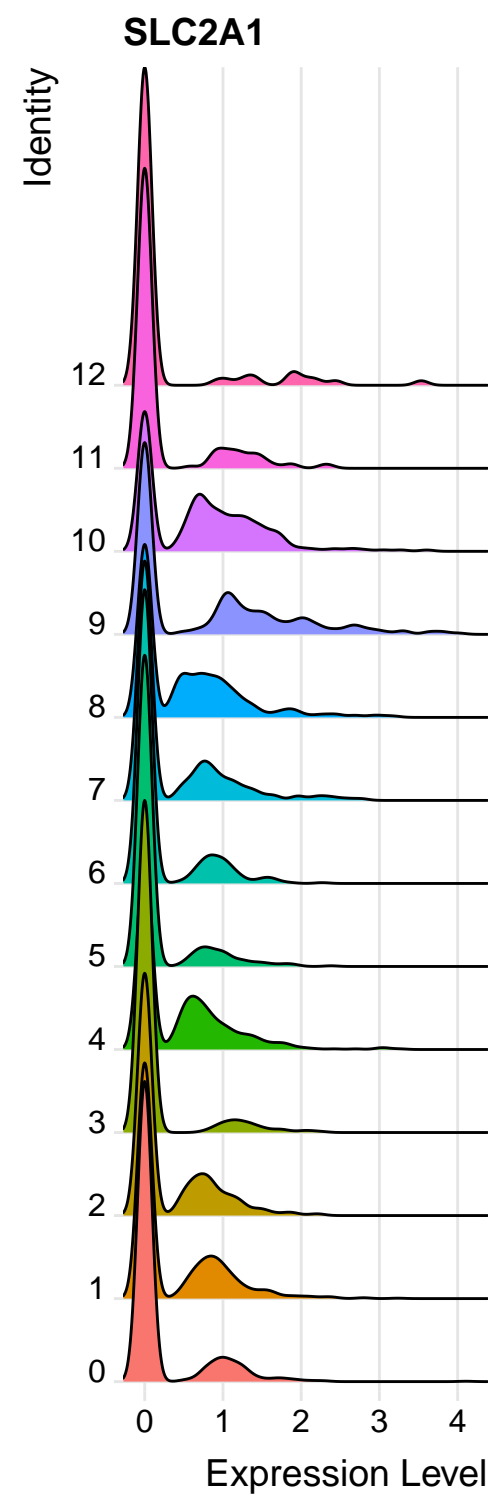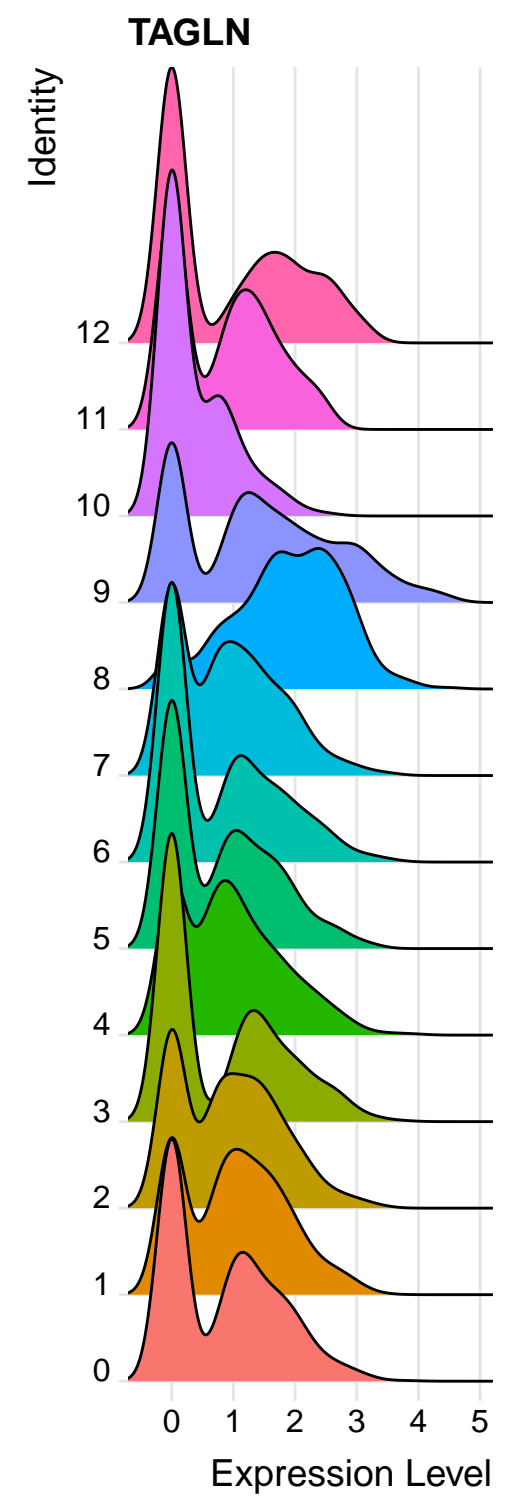



**ANKRD37**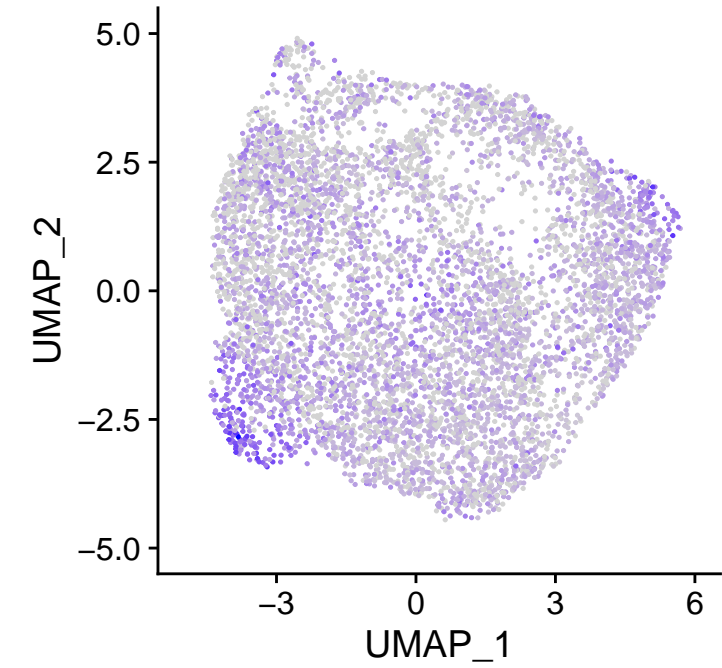**BNIP3**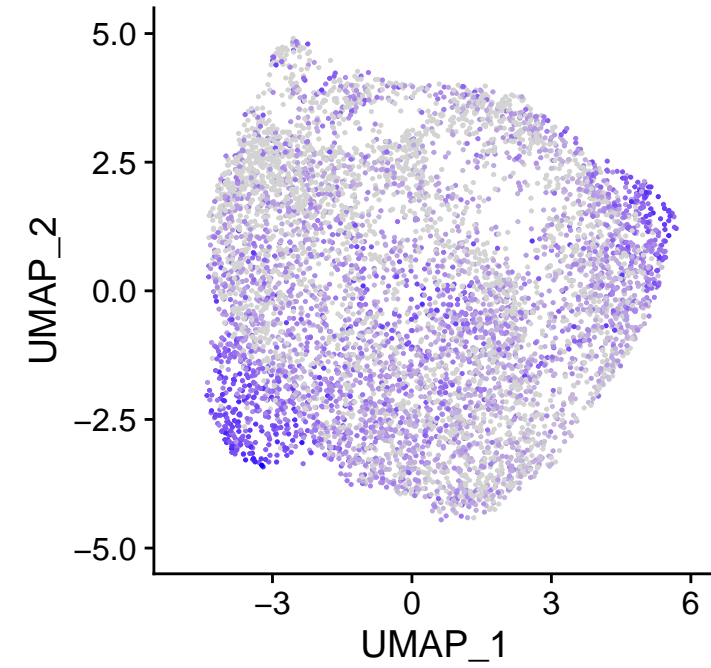**DDIT4**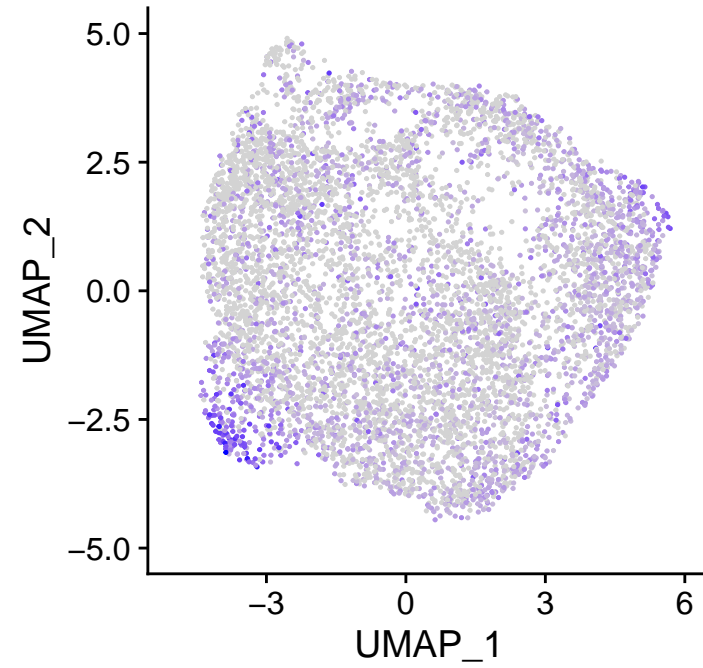**BCL2A1**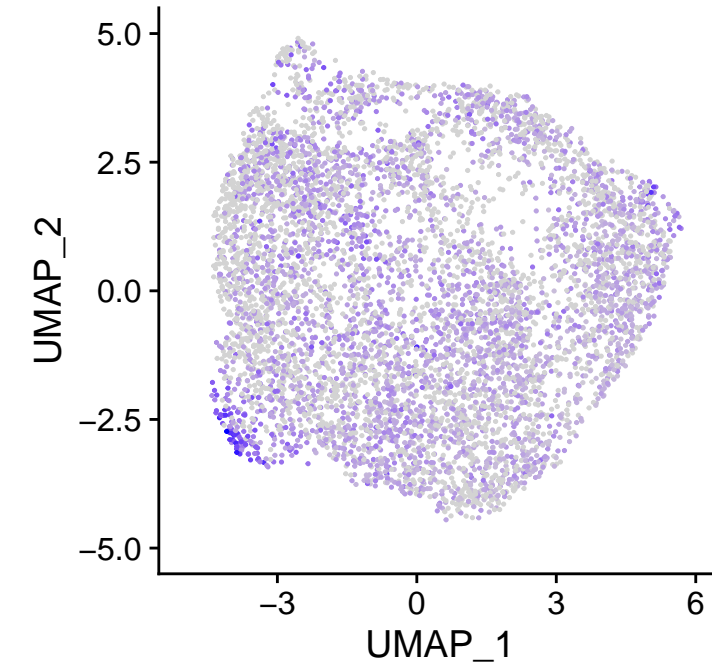**NDUFA4L2**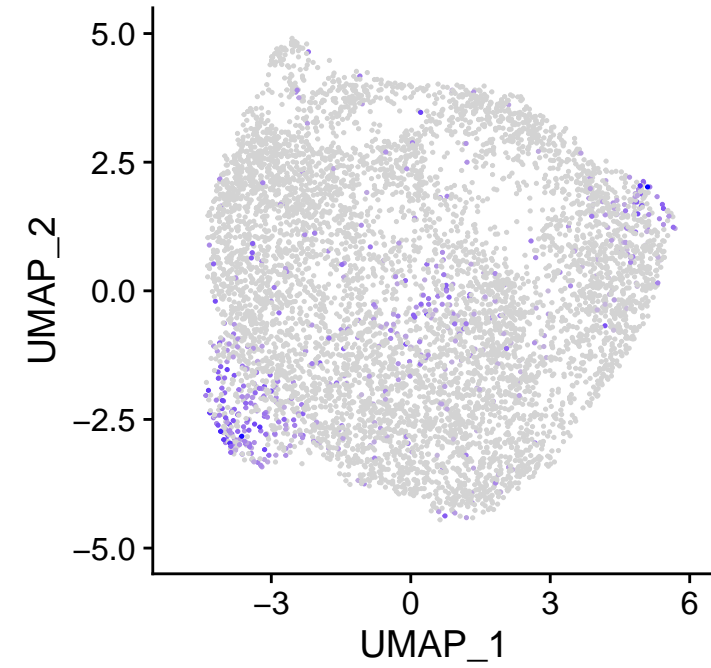**CA9**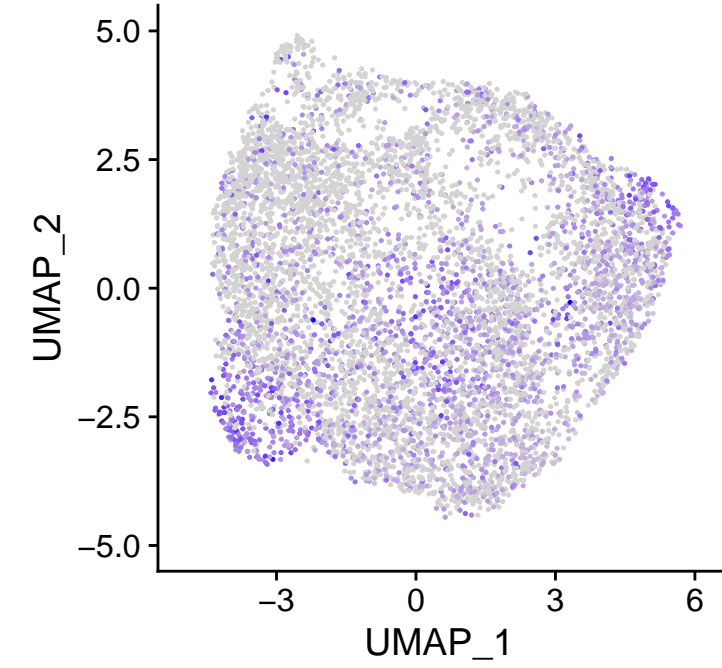**ADM**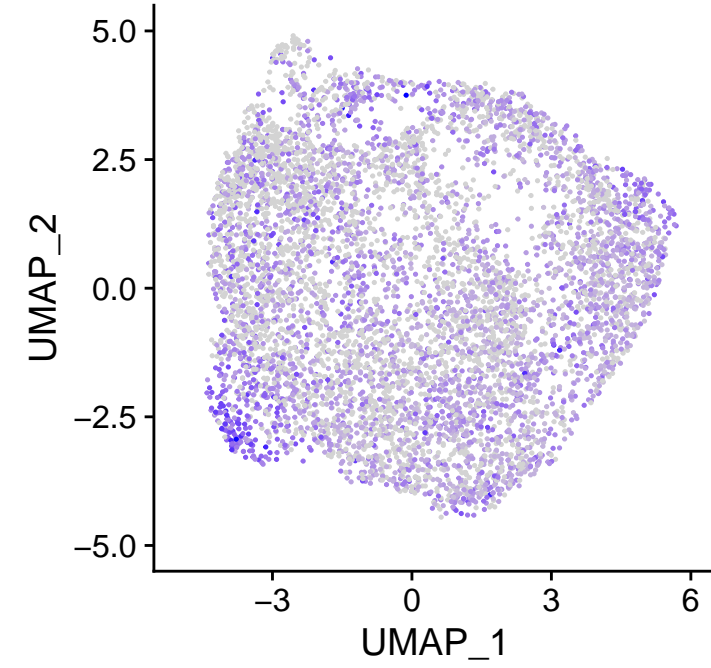**SERPINE1**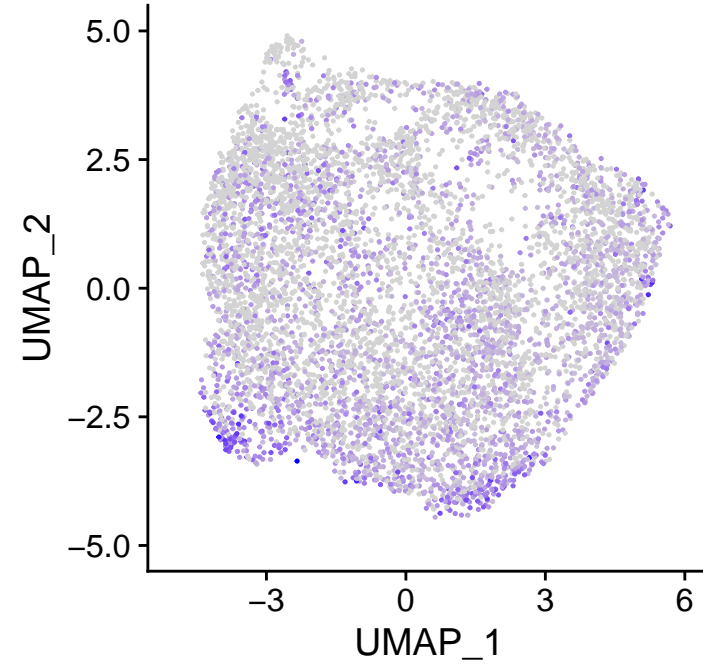**SLC2A1**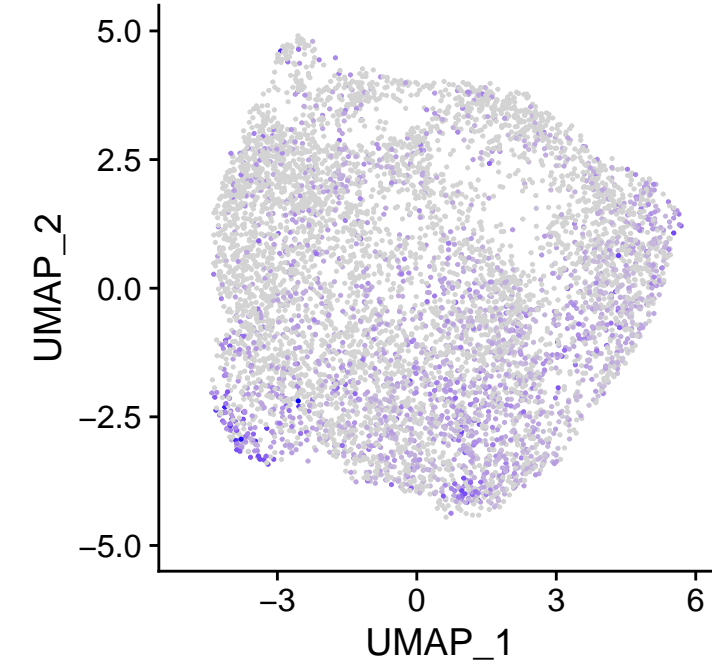**TAGLN**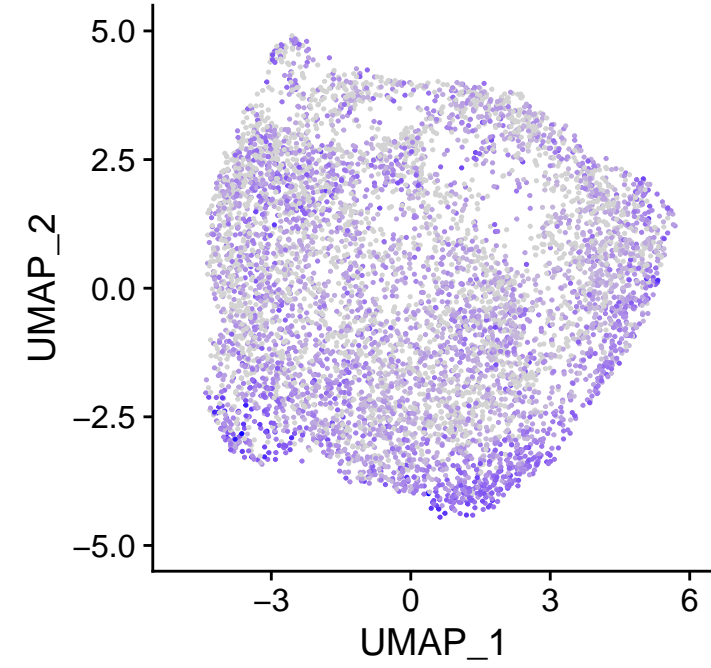

**ENSCAFG0000006456**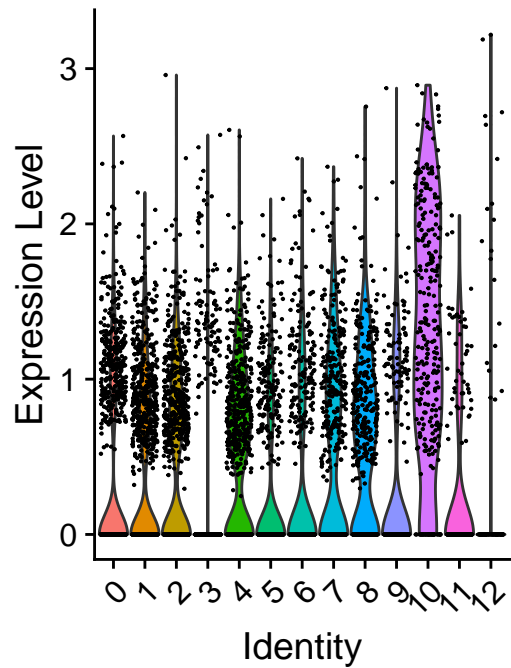**MMUT**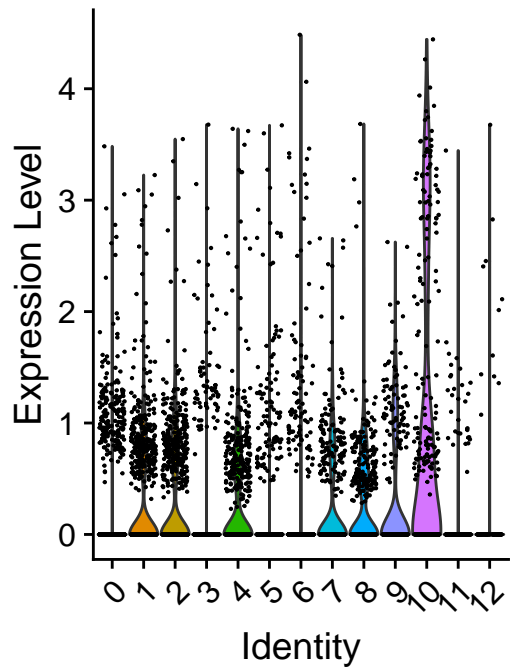**HSPA8**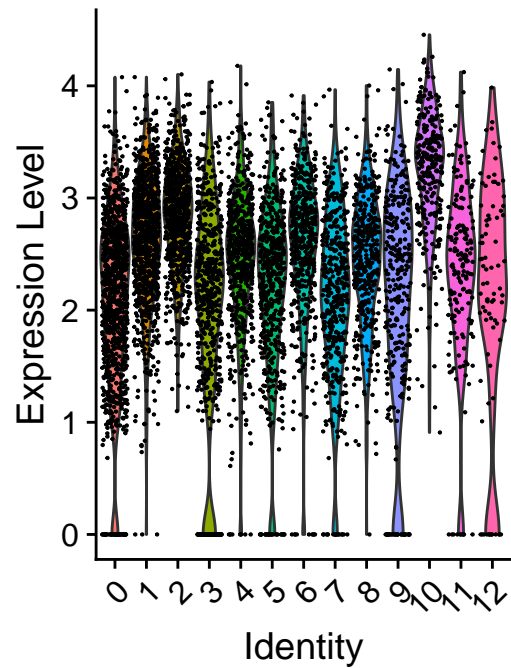**MGST1**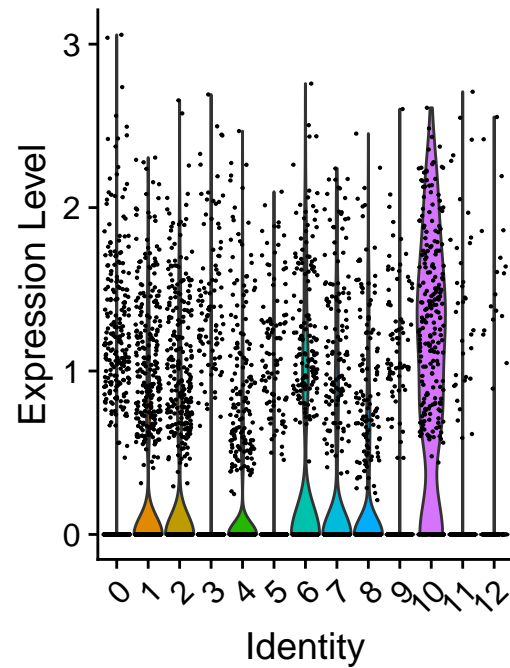**AIF1L**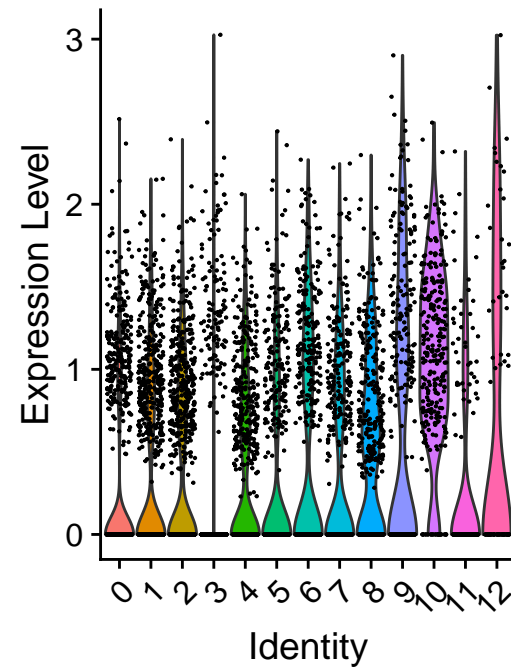**HSP90AA1**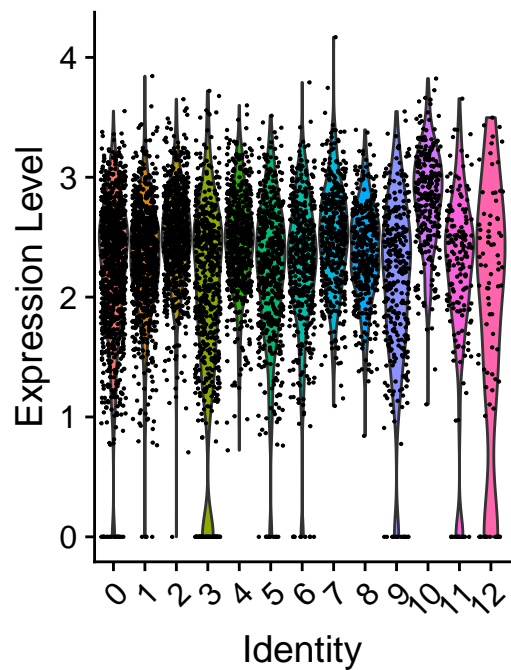**NID2**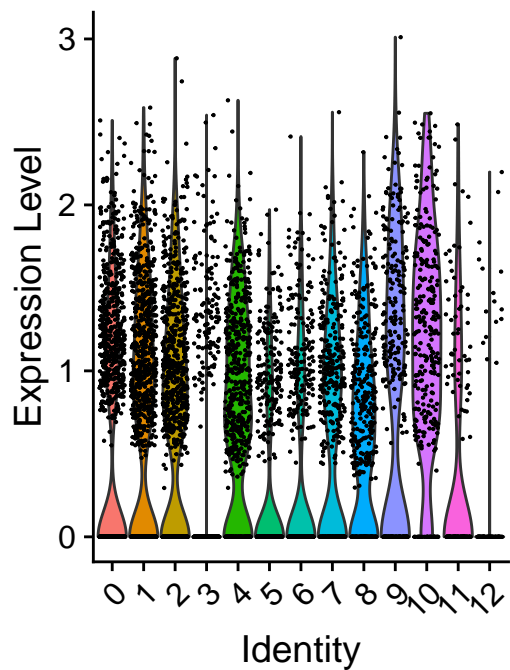**SOD2**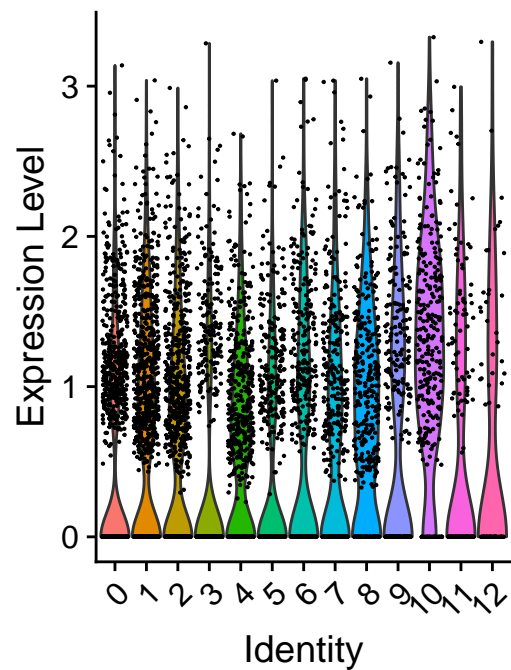**ENSCAFG00000031706**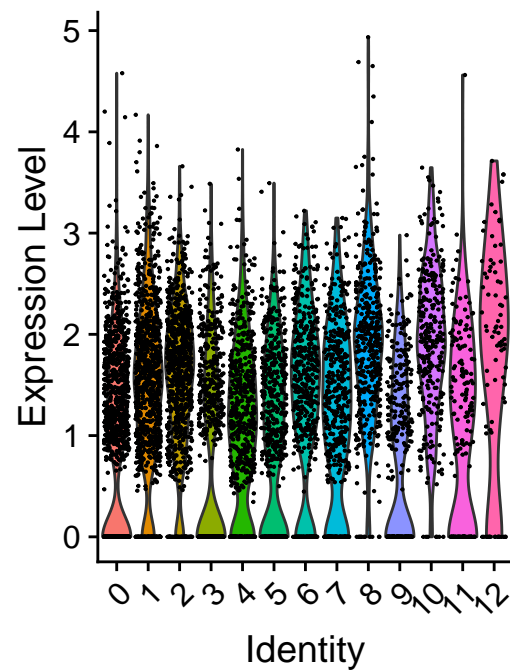**SLC2A1**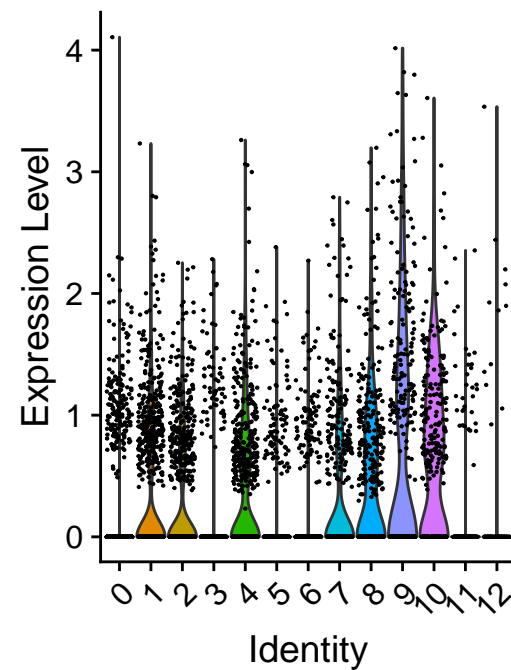

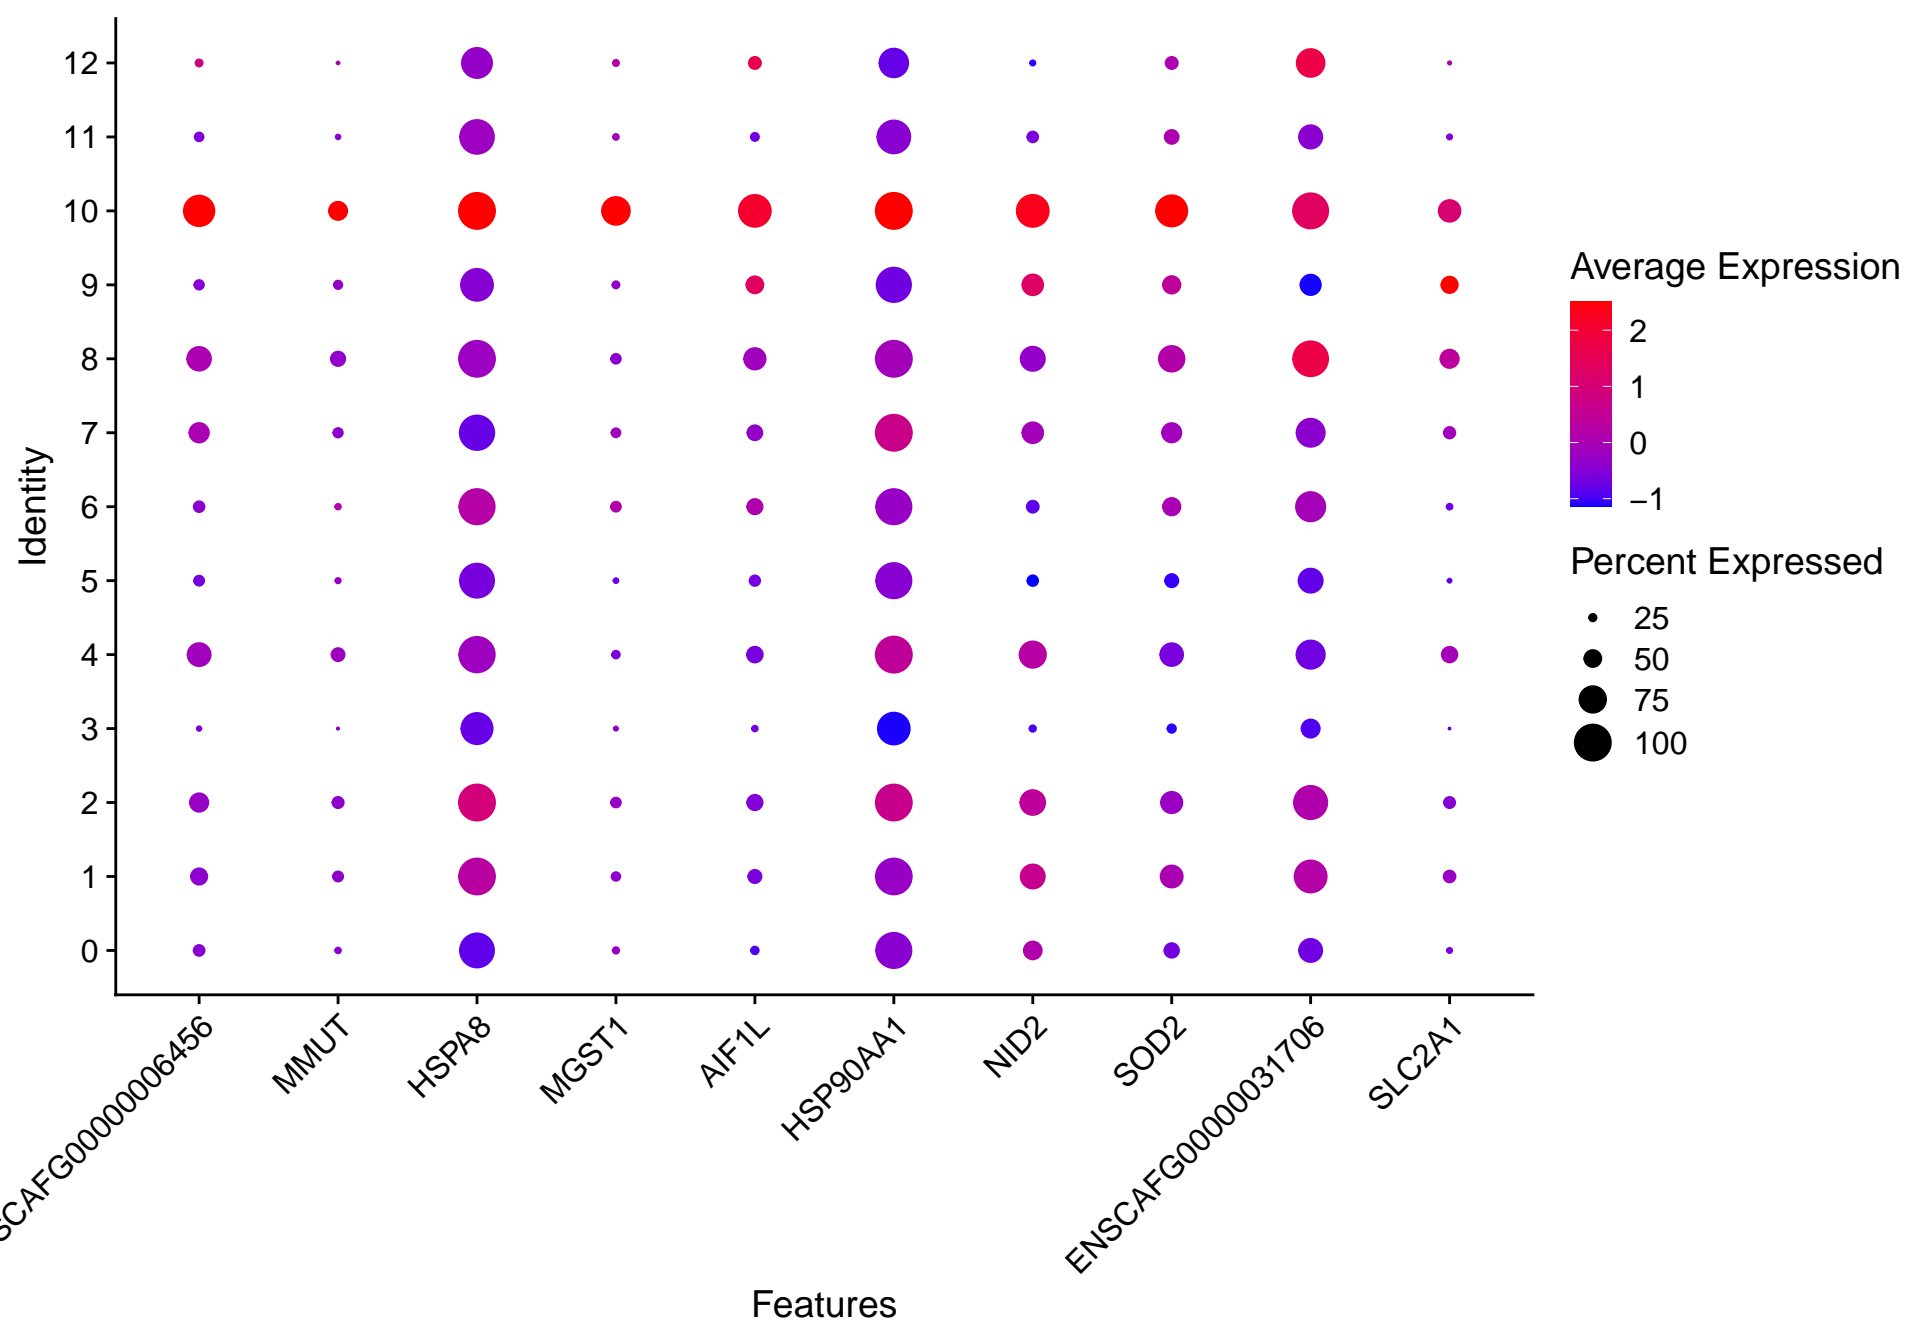



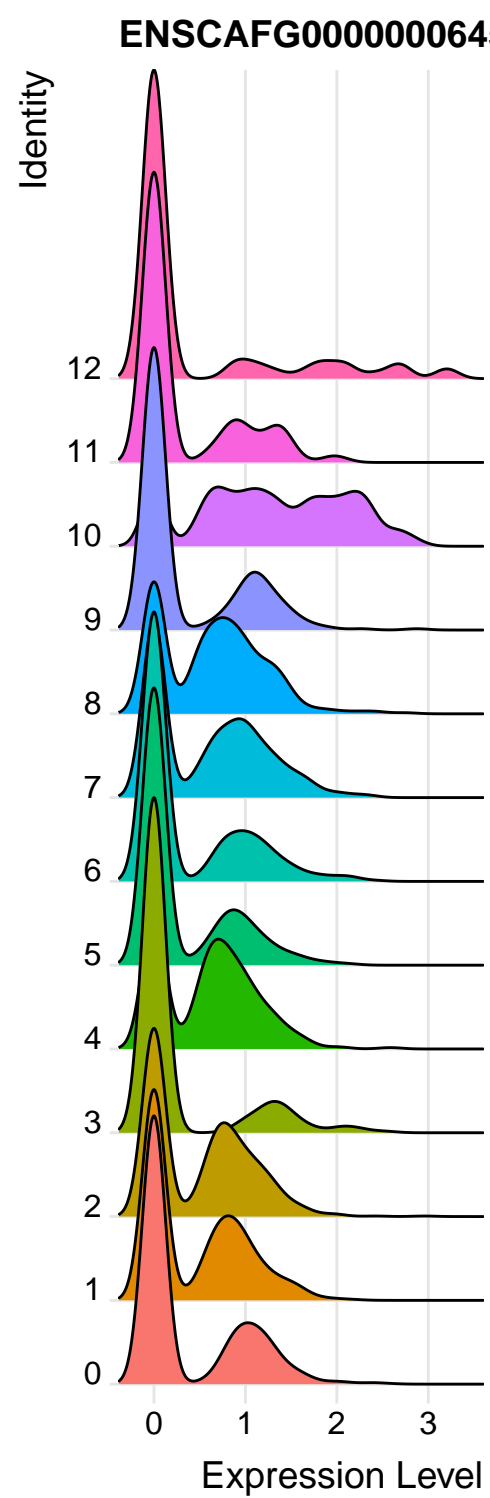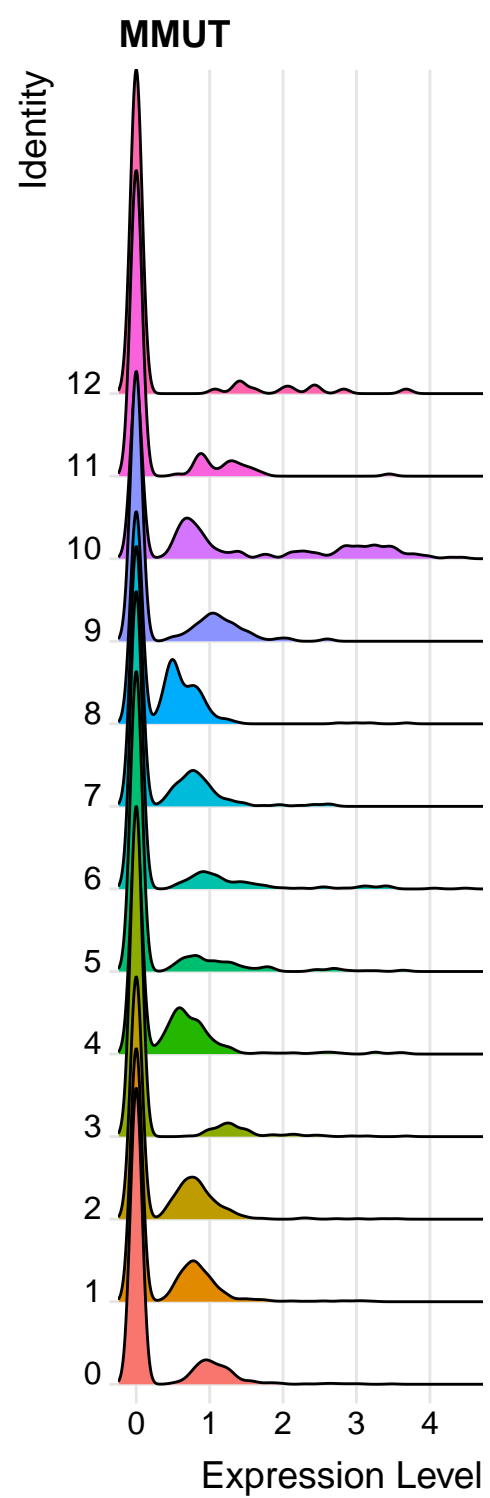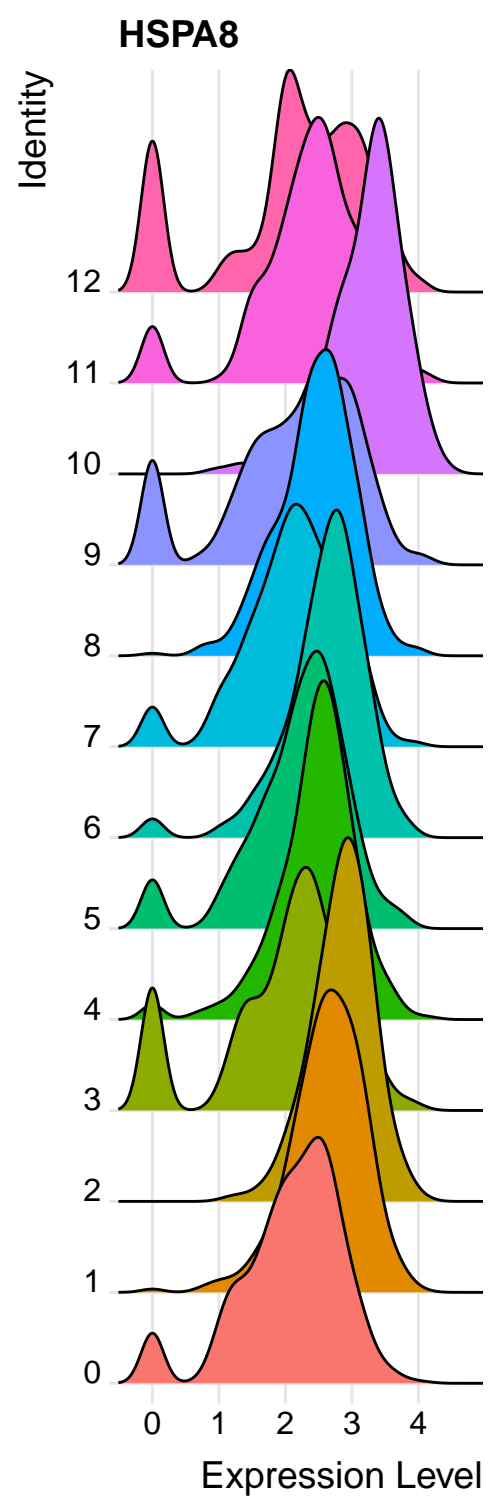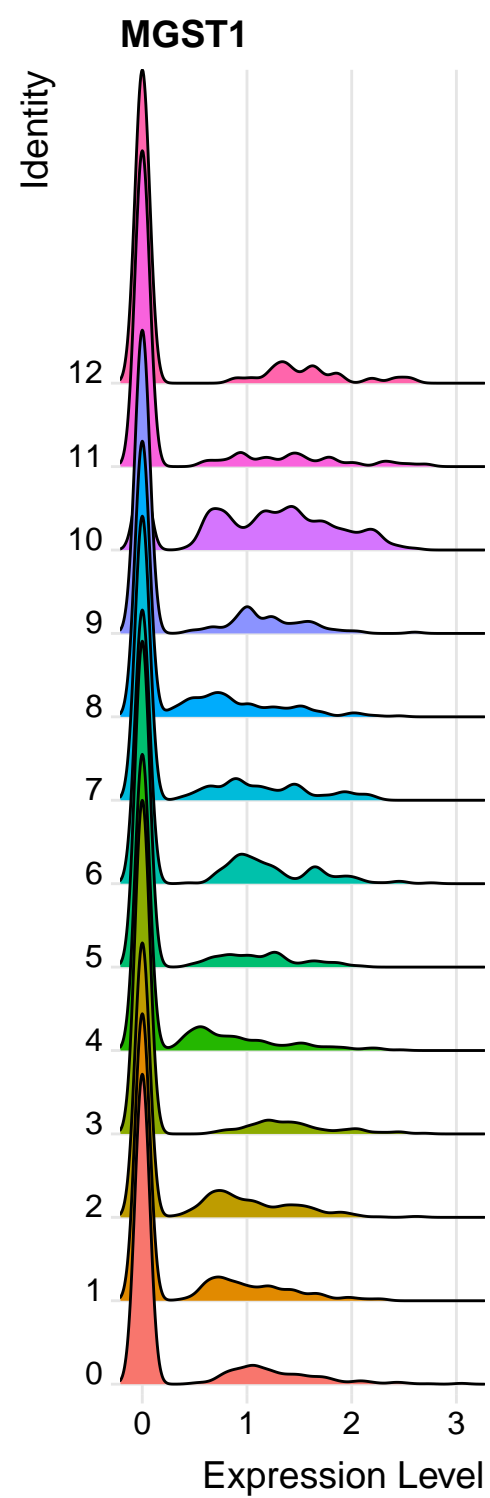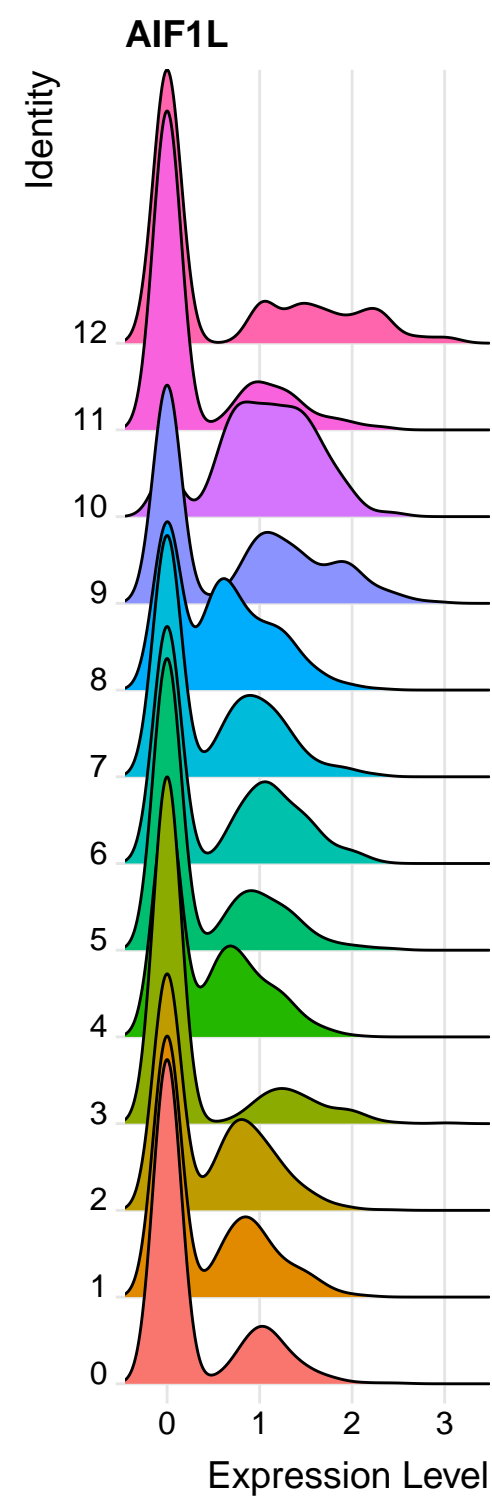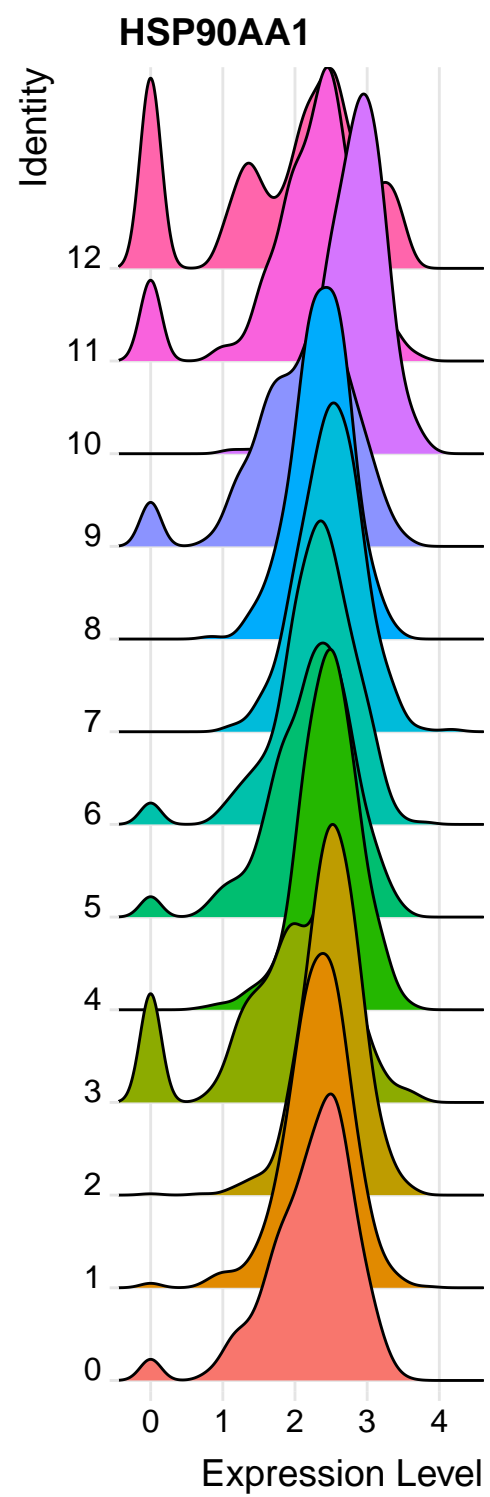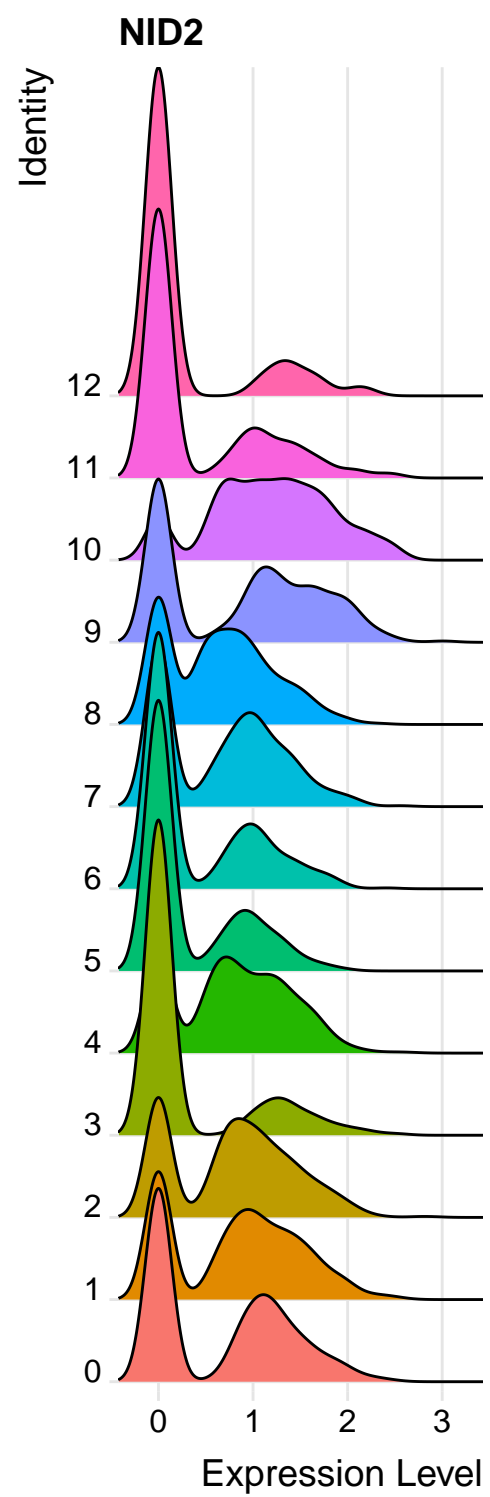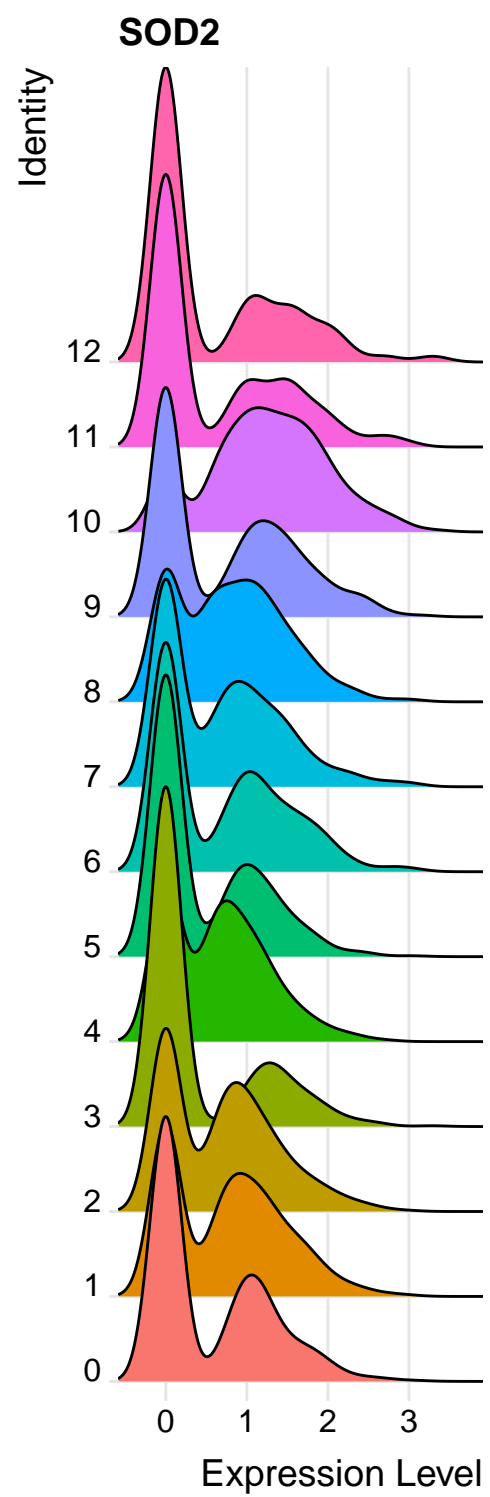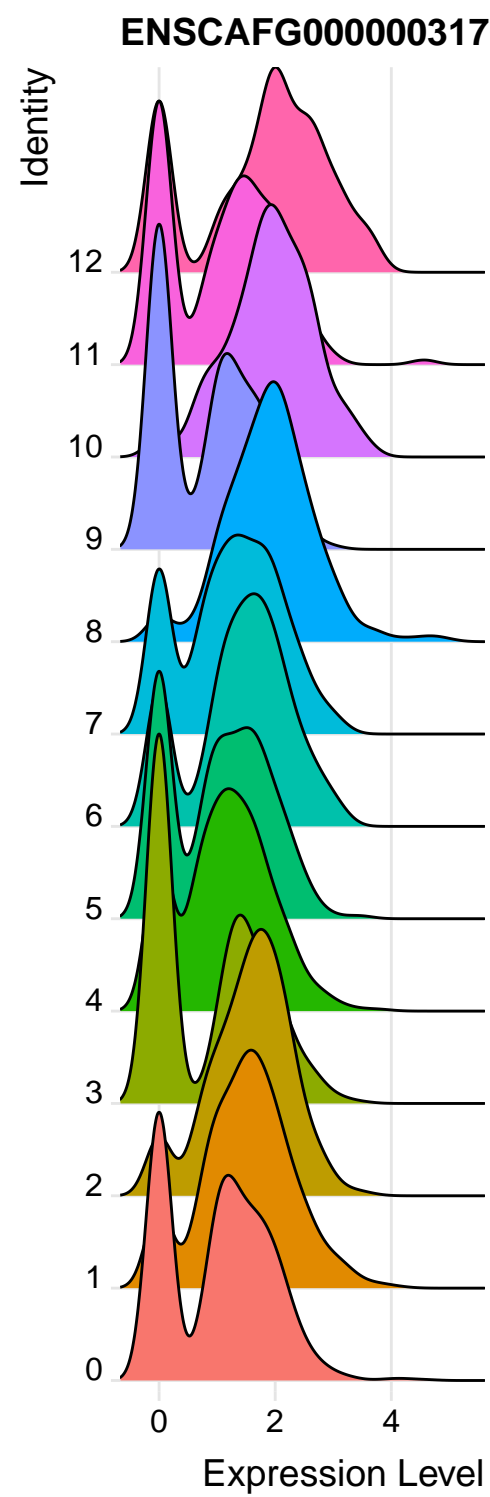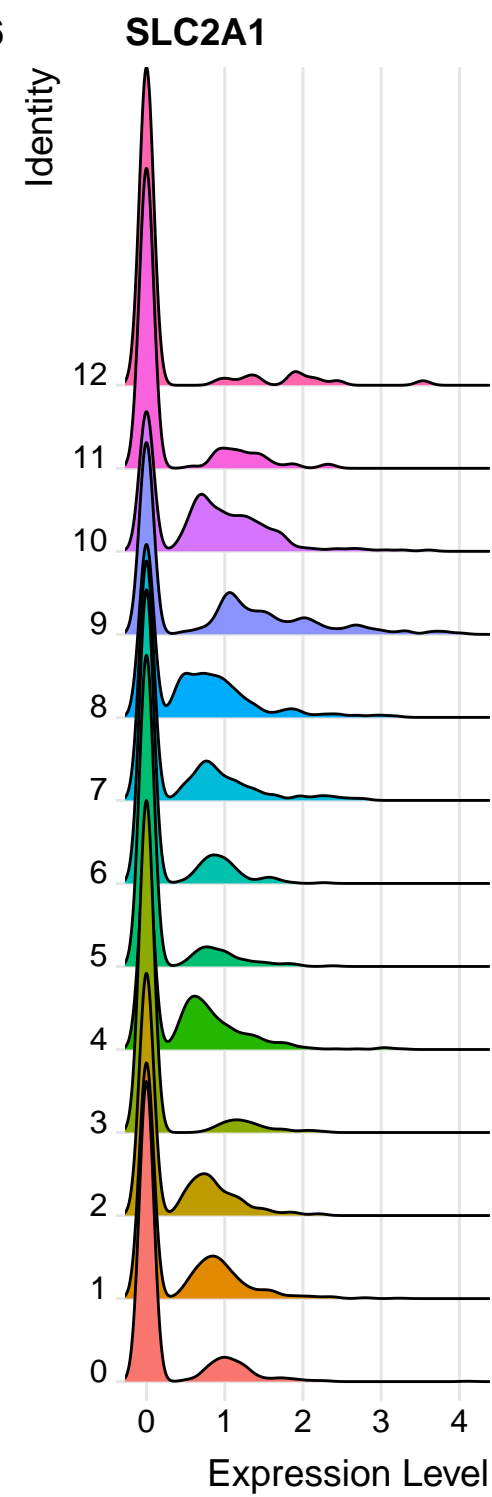

**ENSCAFG0000006456**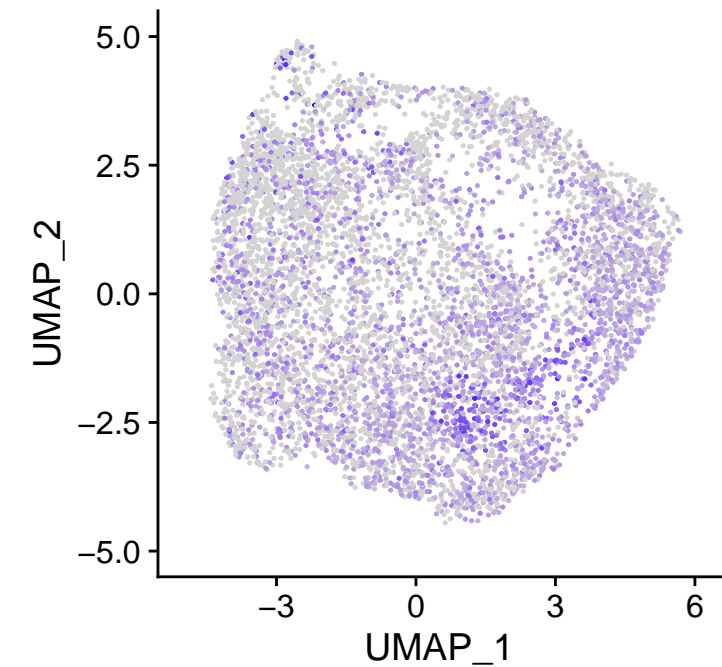**MMUT**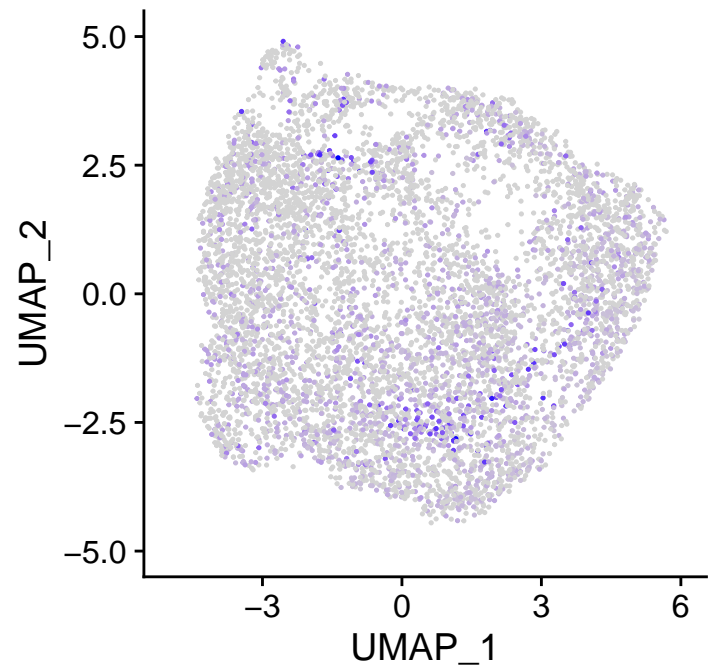**HSPA8**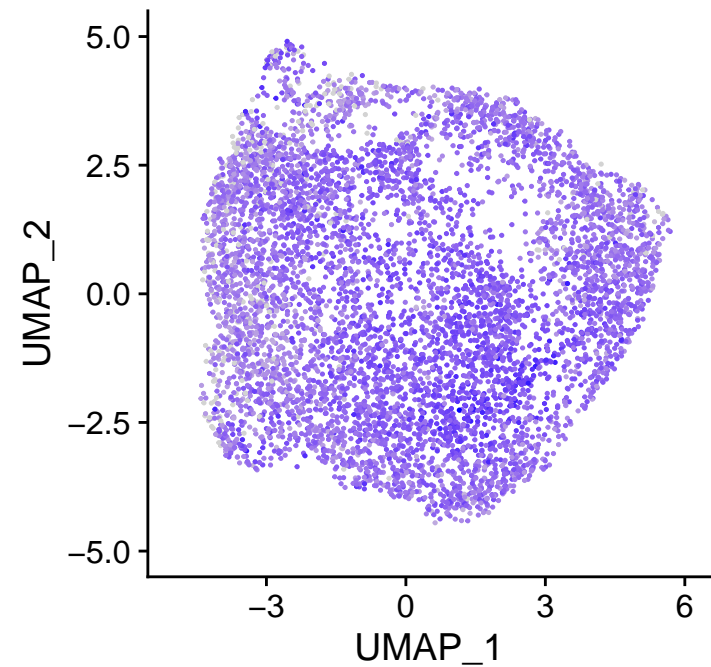**MGST1**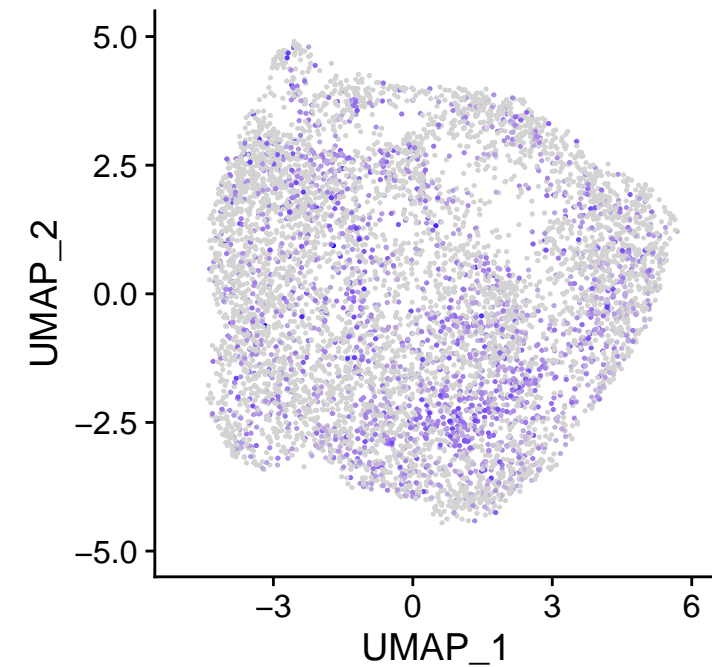**AIF1L**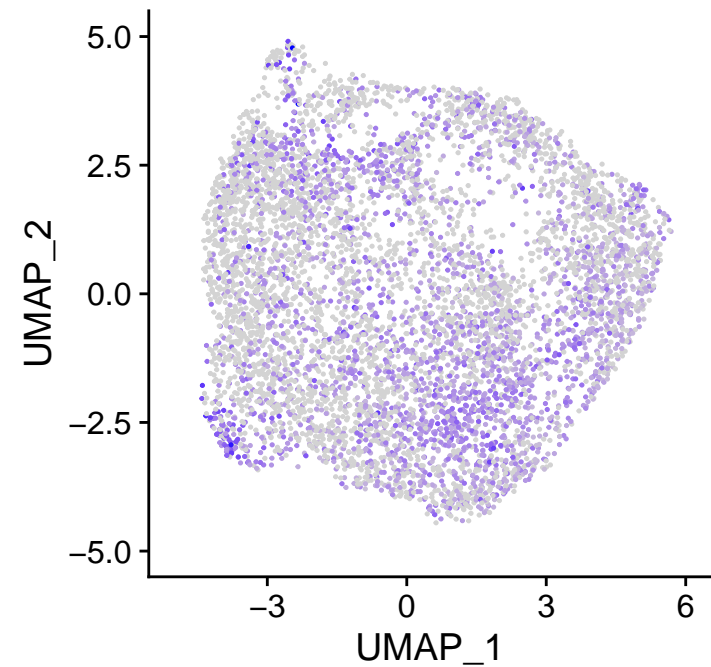**HSP90AA1**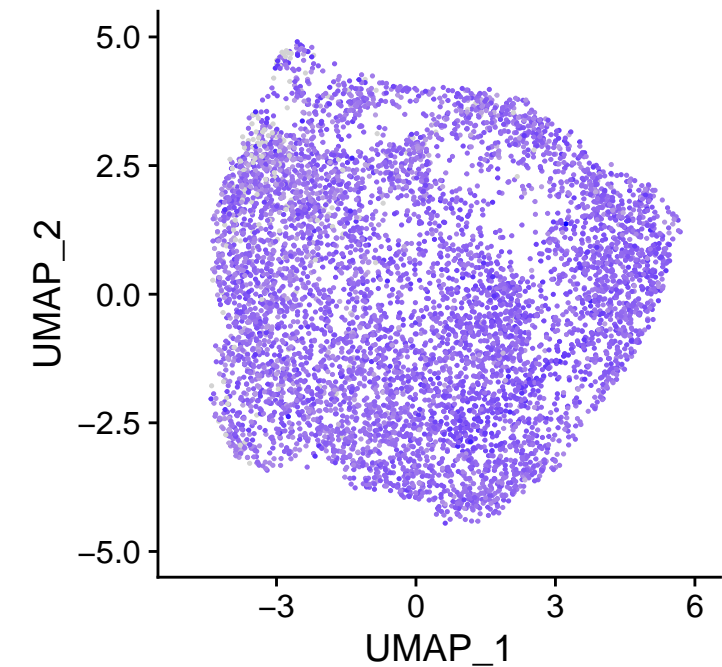**NID2**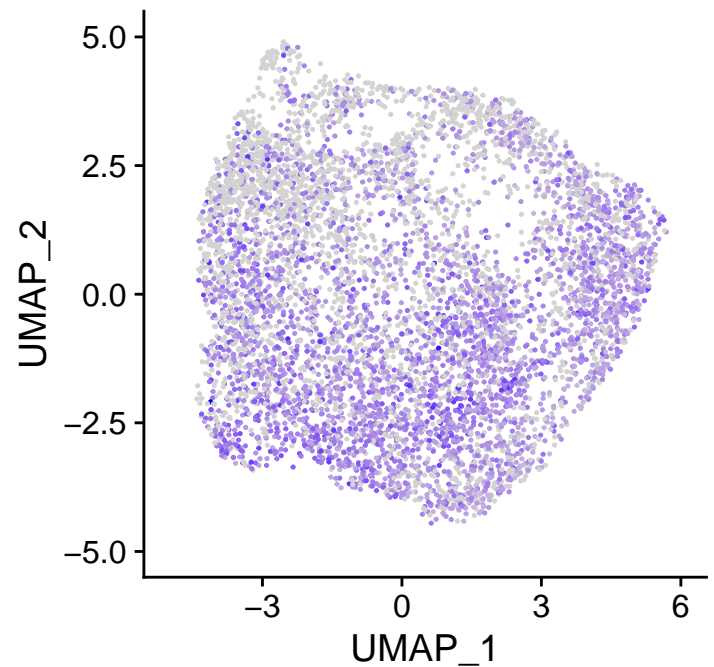**SOD2**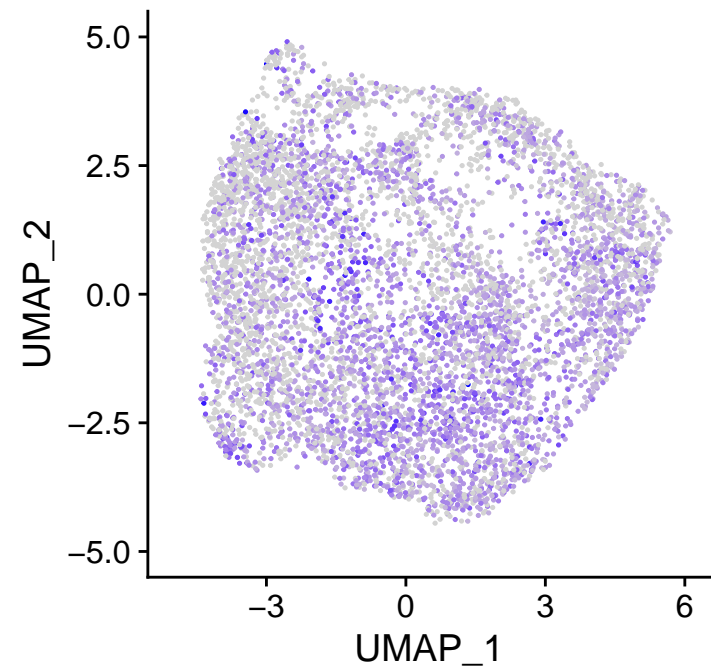**ENSCAFG00000031706**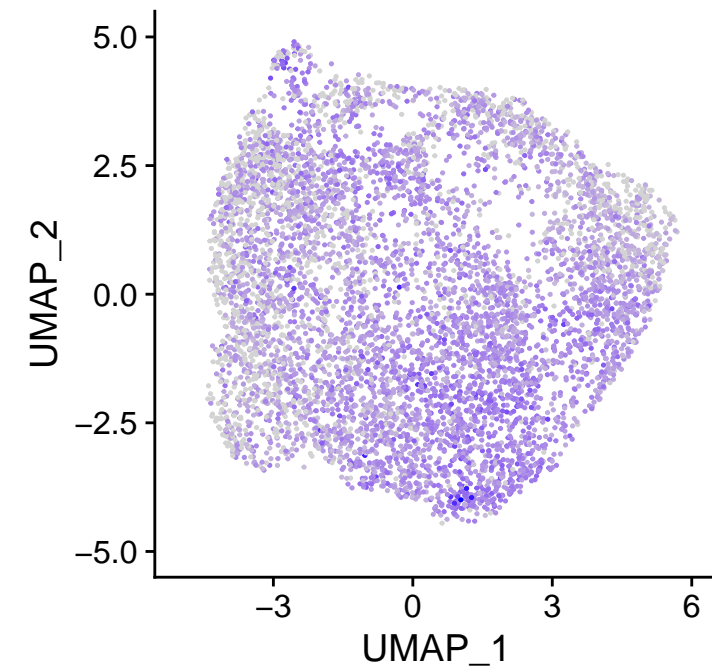**SLC2A1**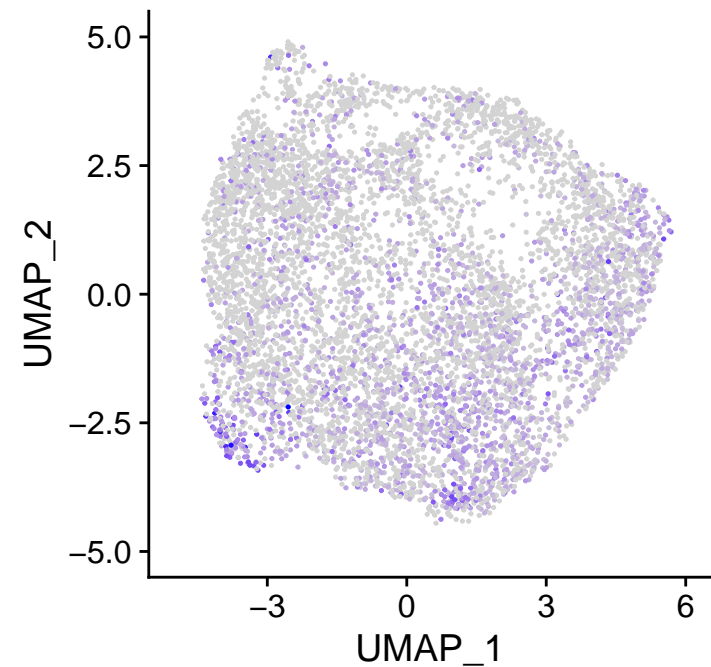



**ISG15**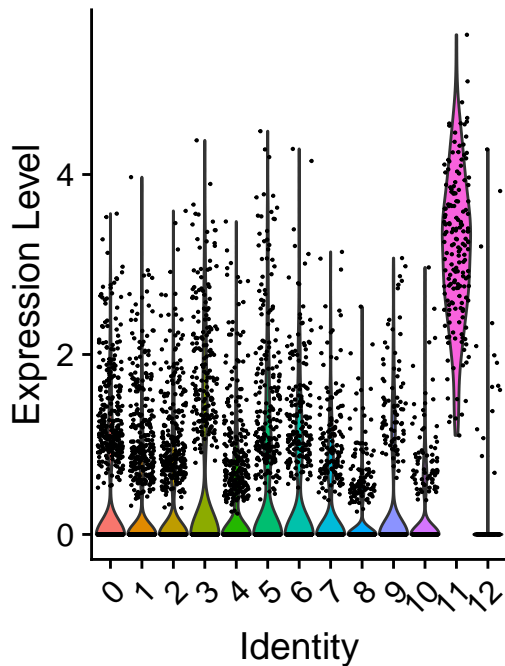**MX2**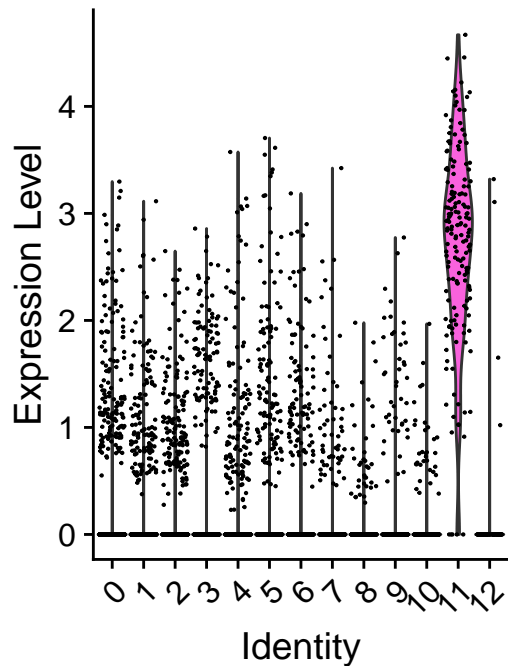**OAS1**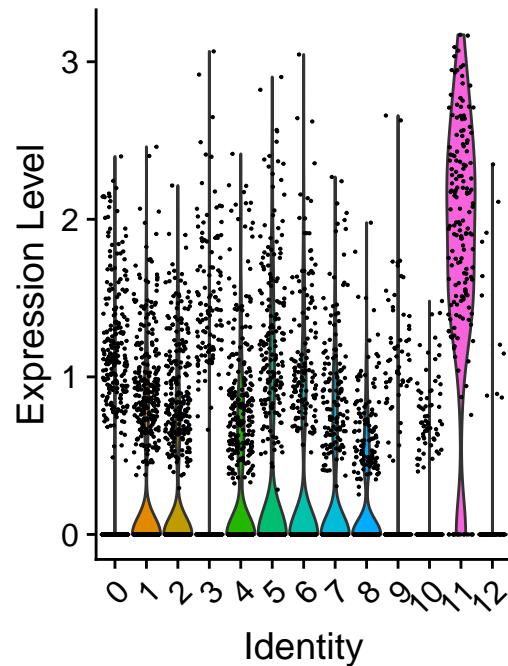**DDX58**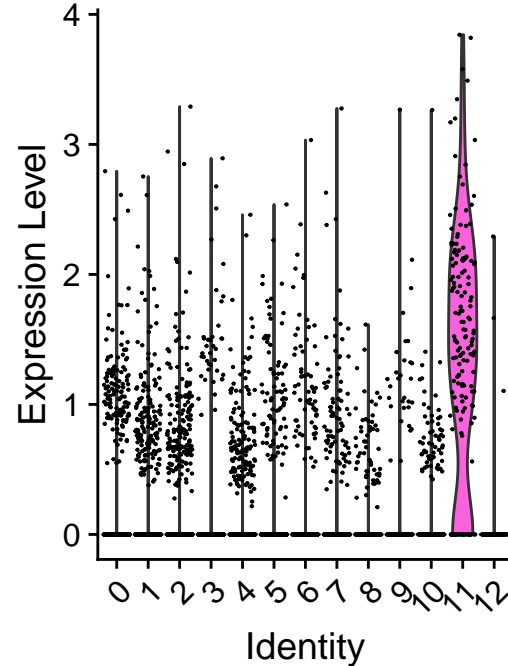**IFI44**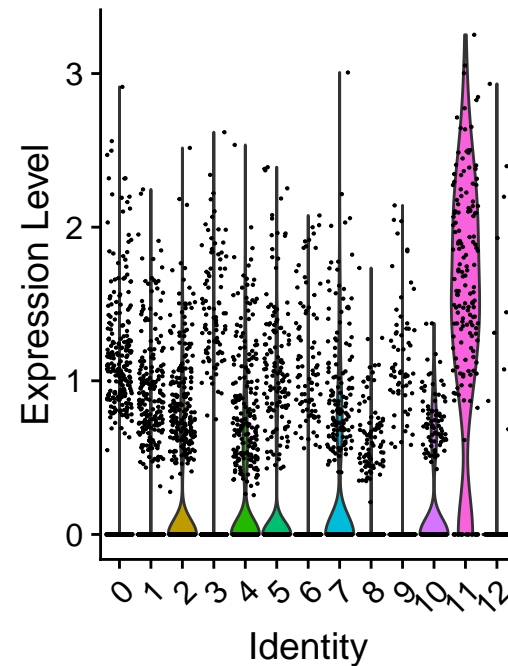**ENSCAFG00000016252**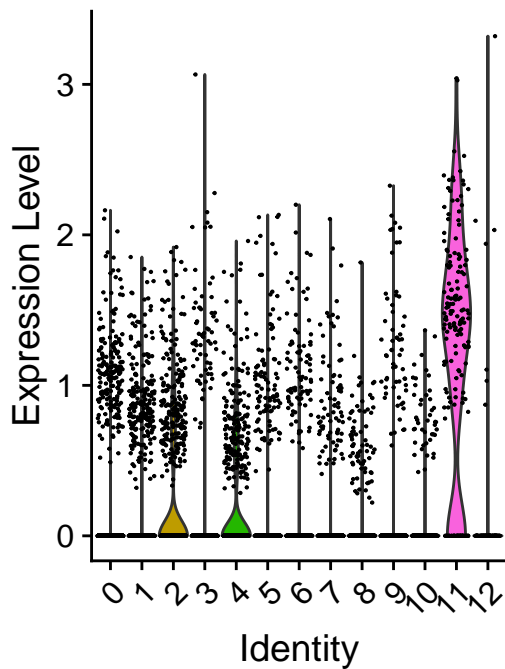**ENSCAFG00000025115**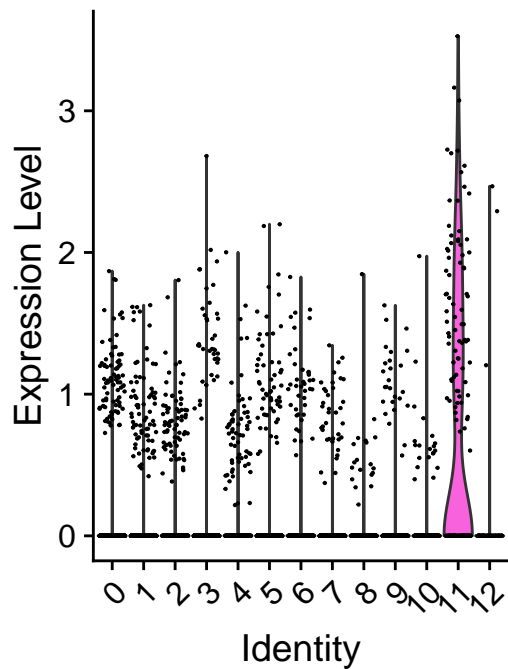**RSAD2**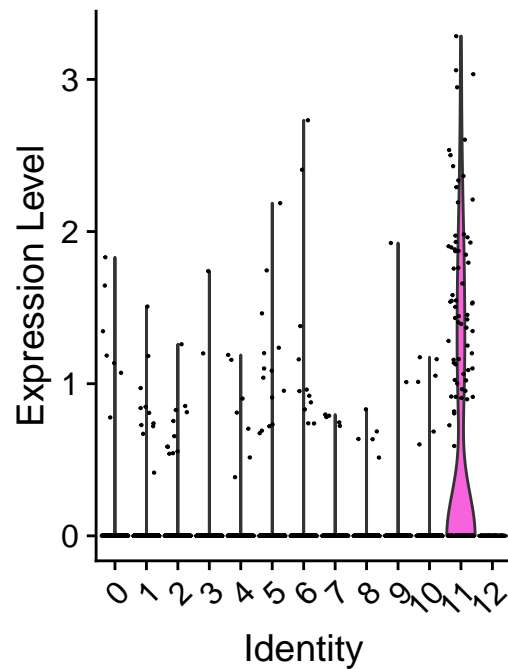**ISG20**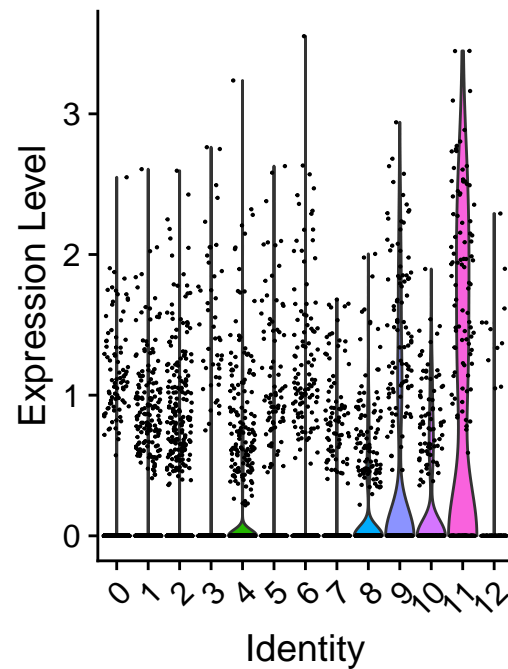**IFI6**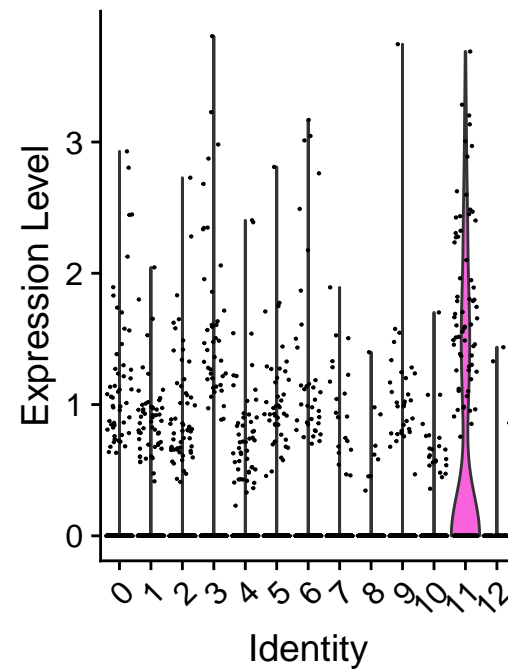



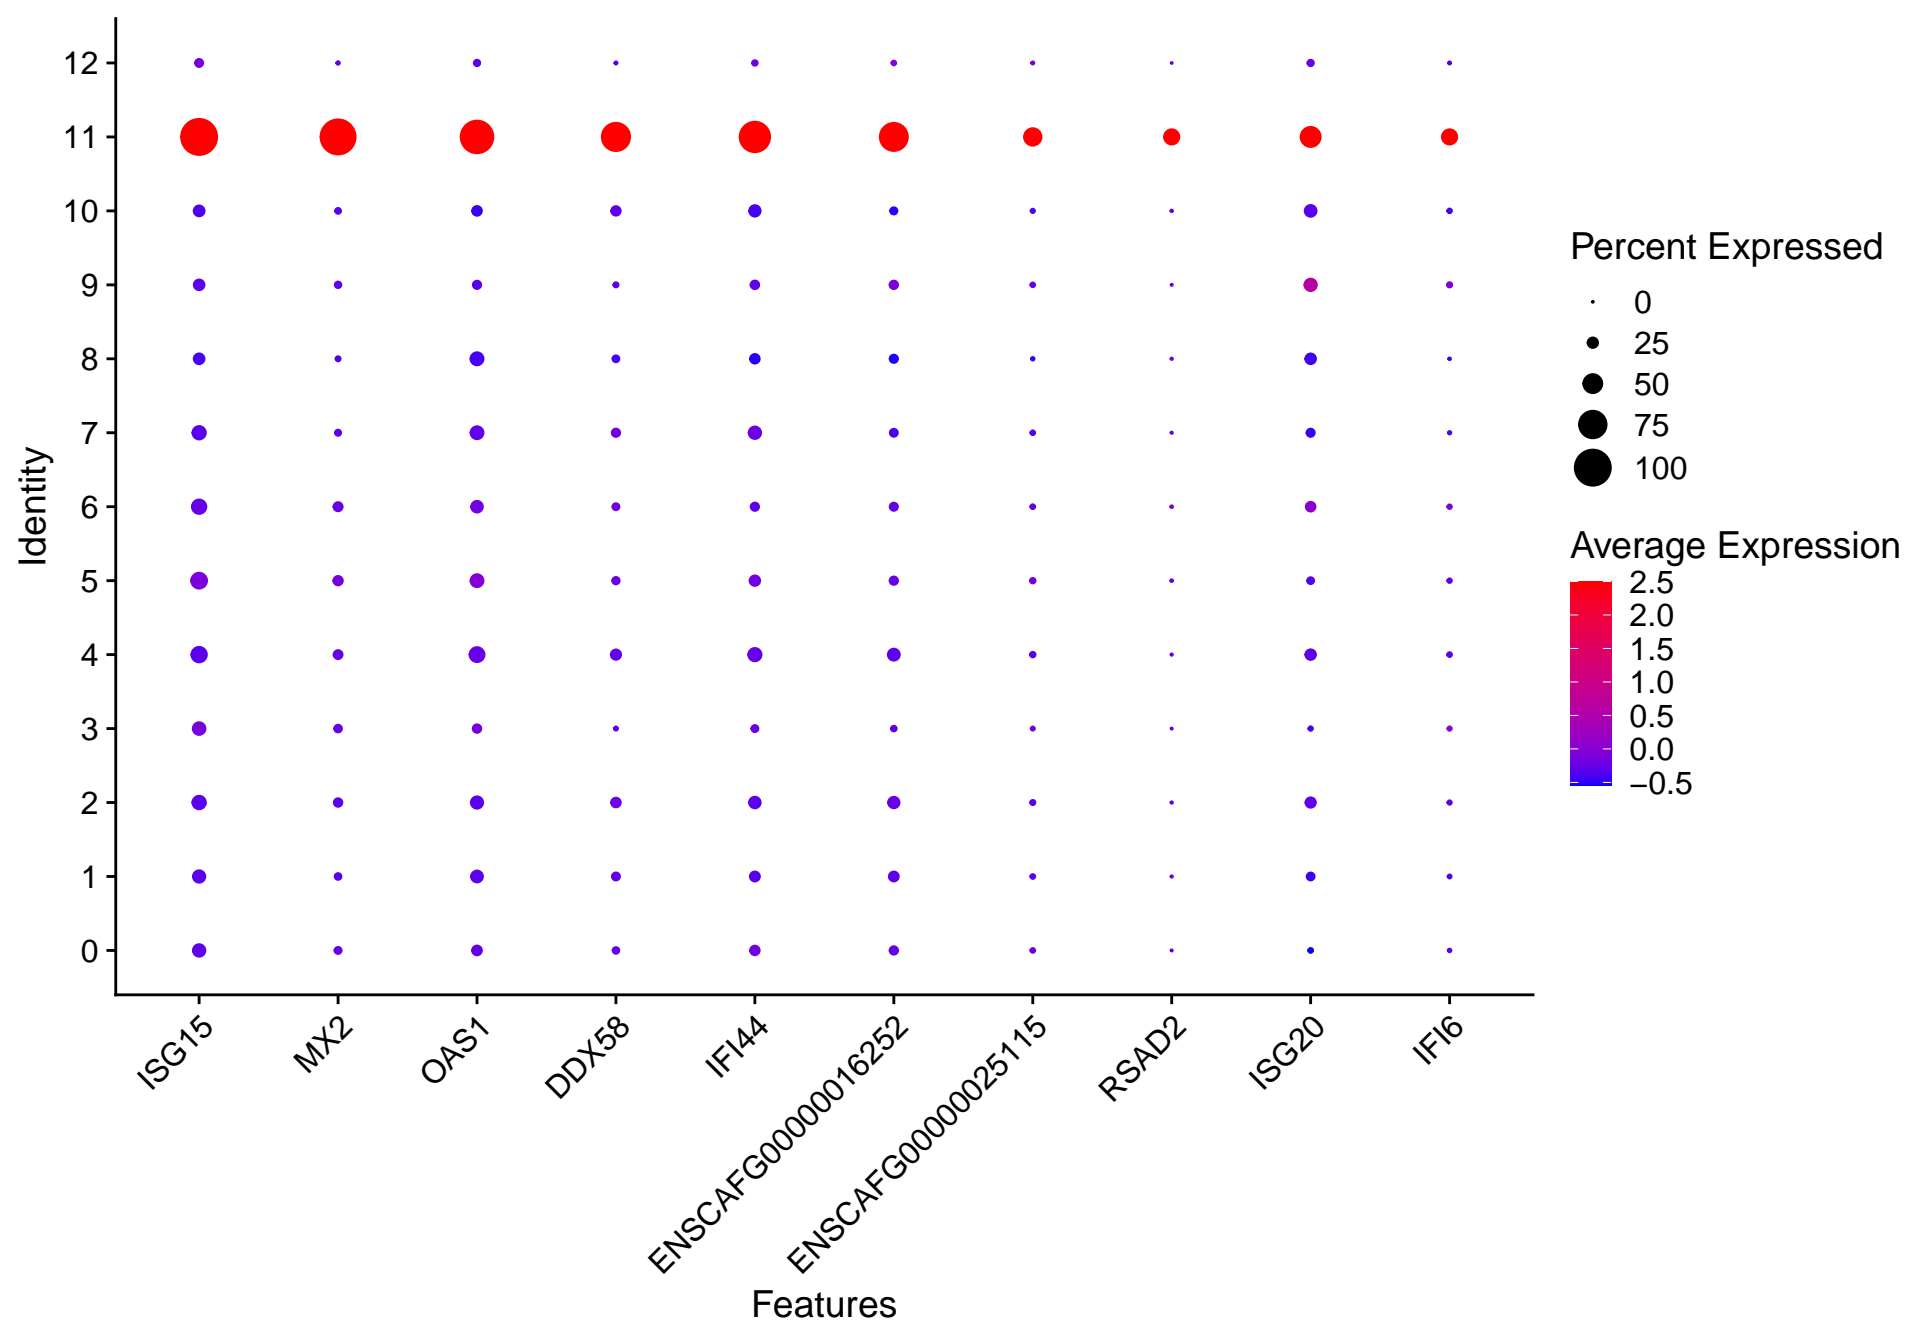

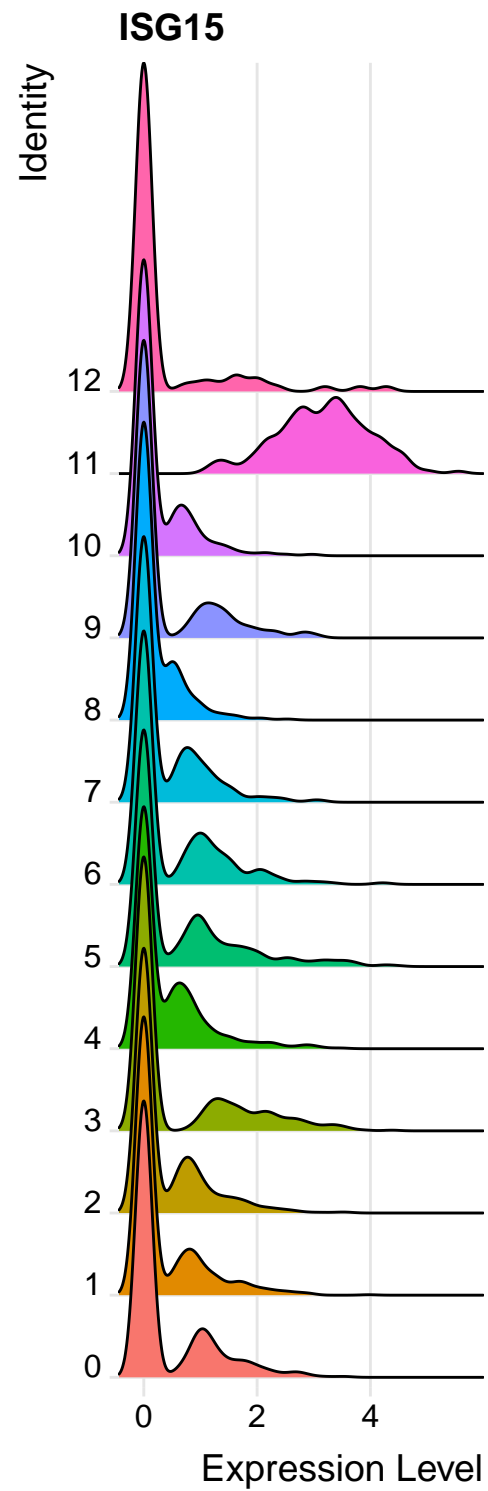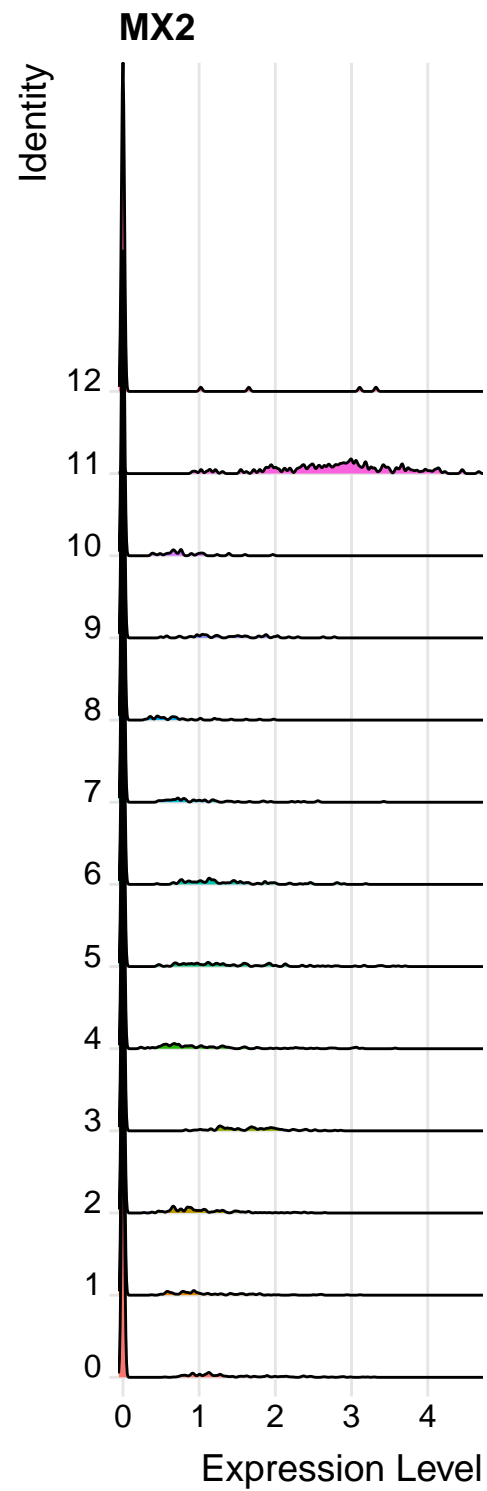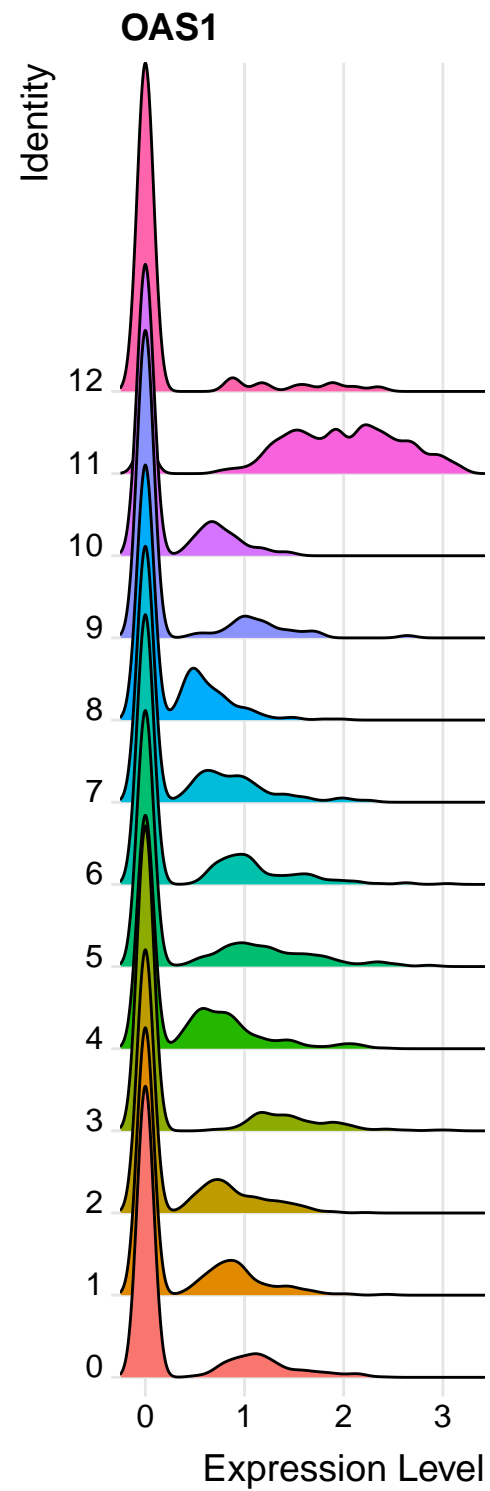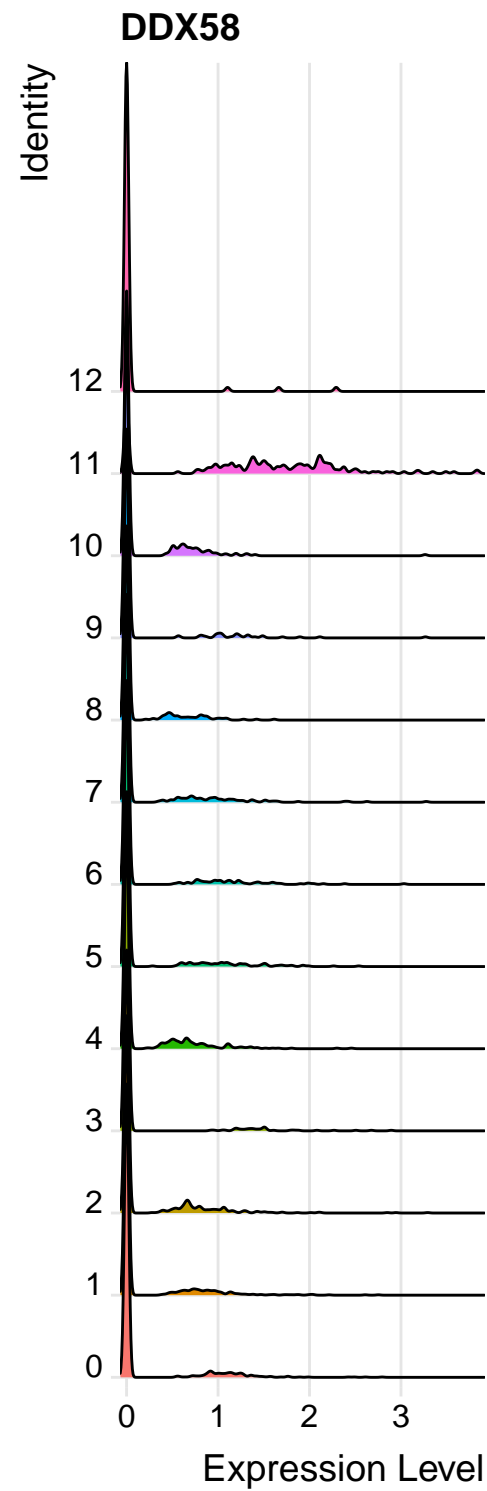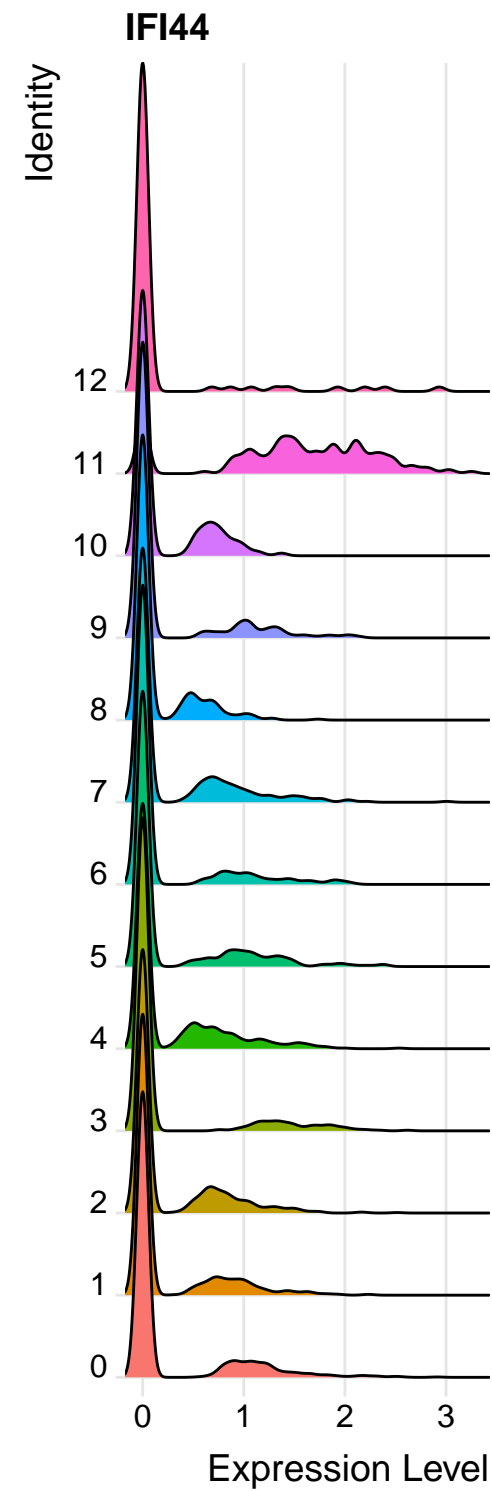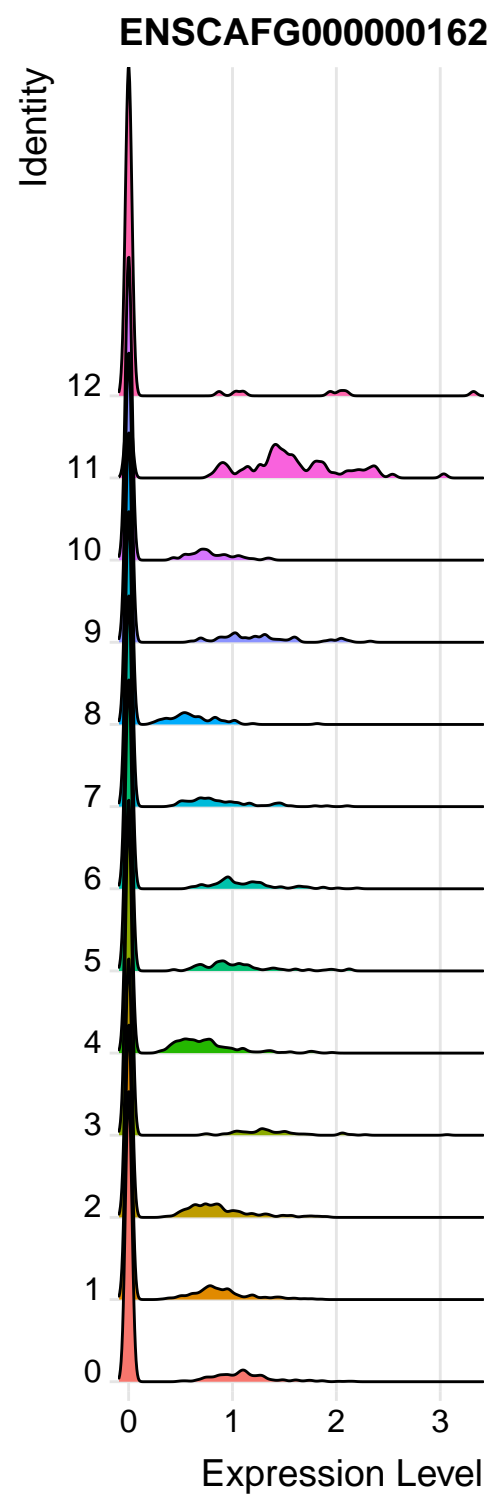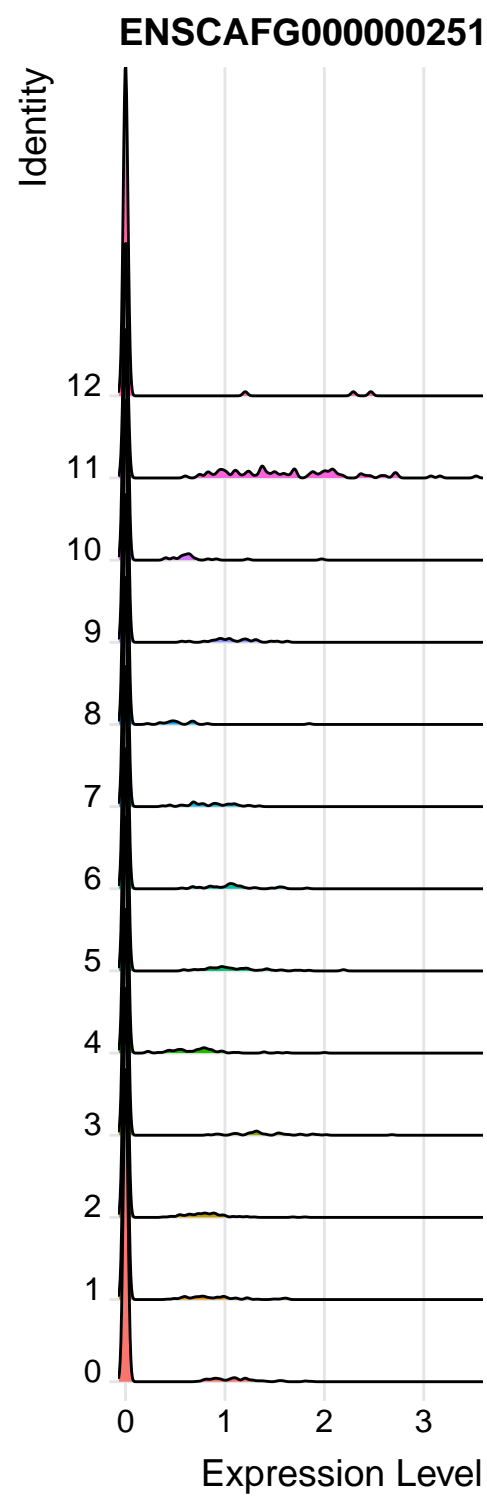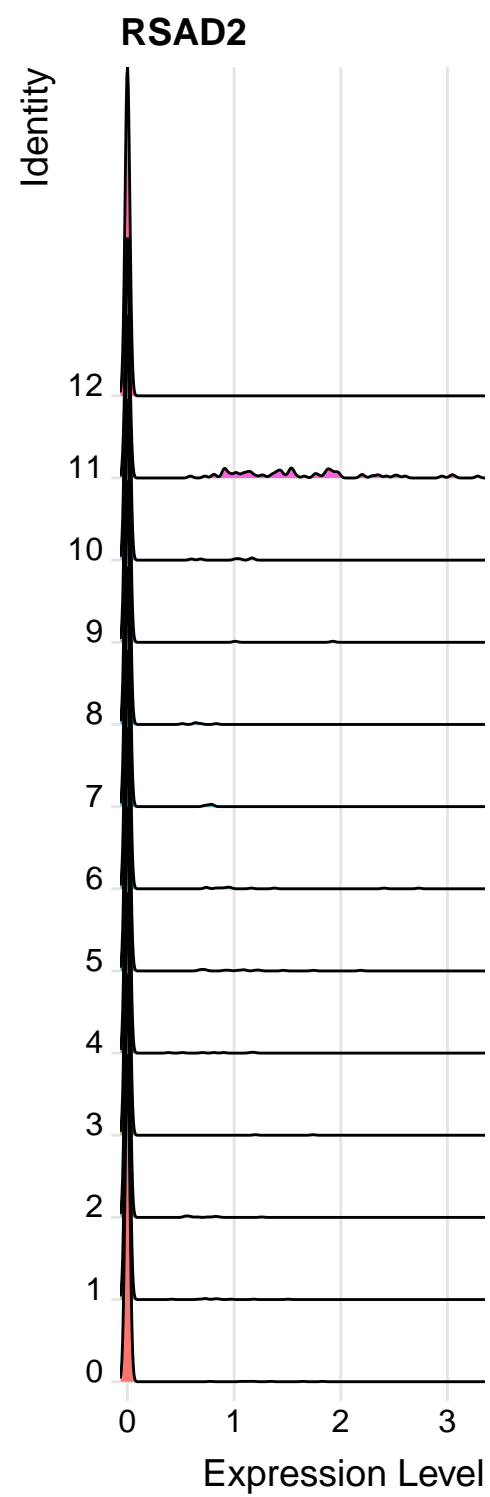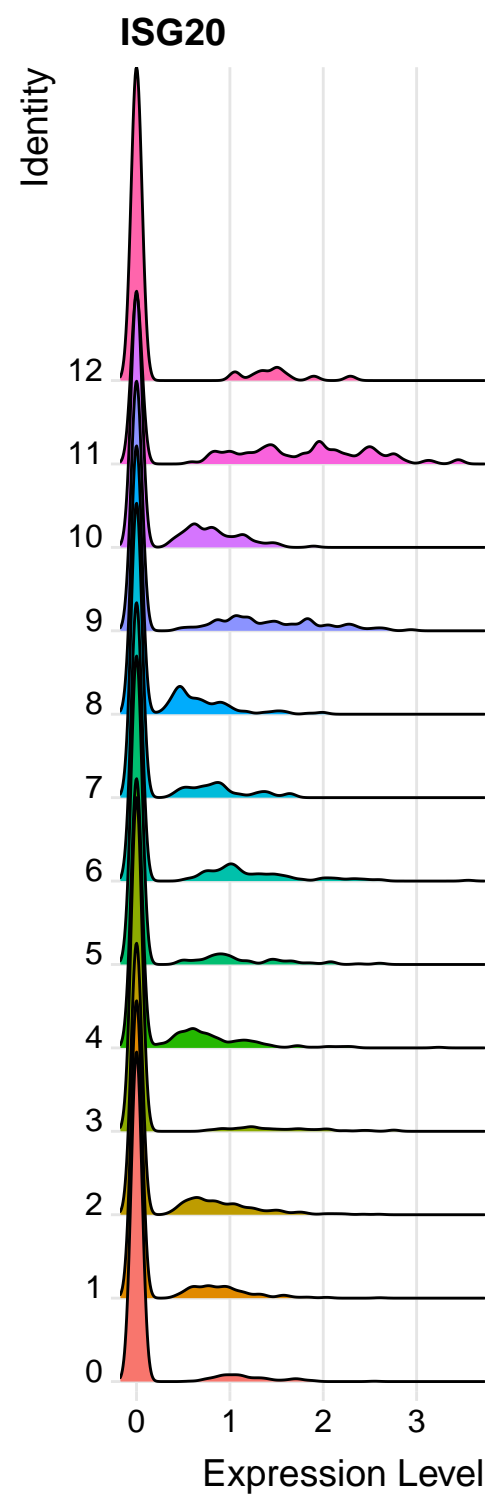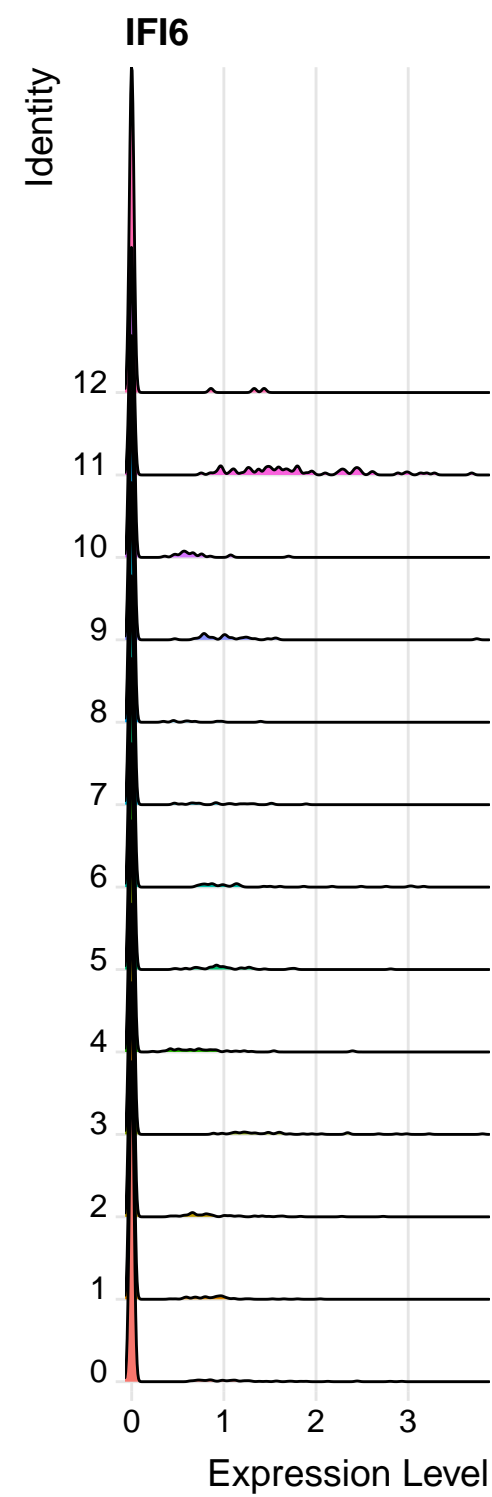

**ISG15**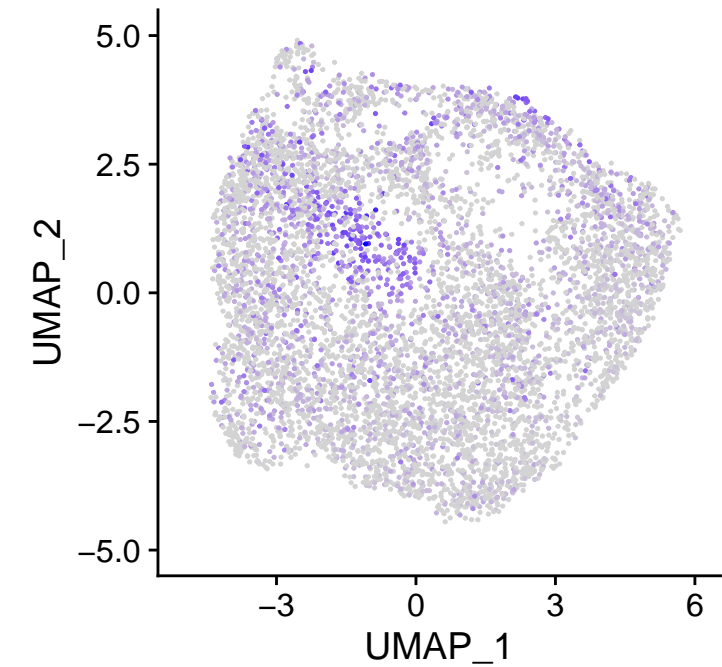**MX2**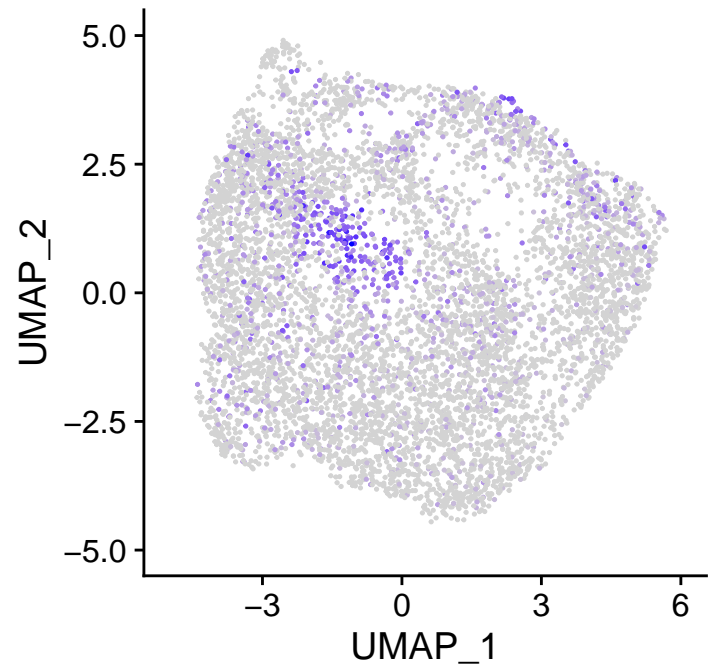**OAS1**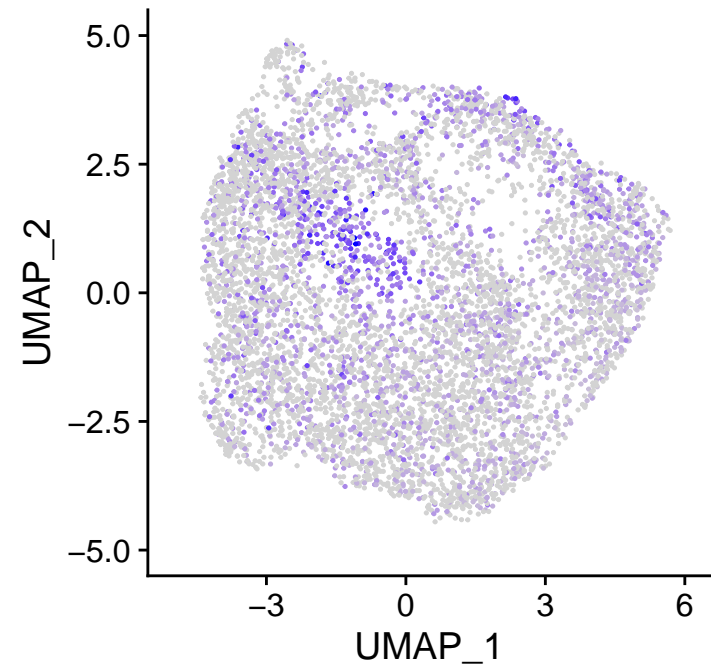**DDX58**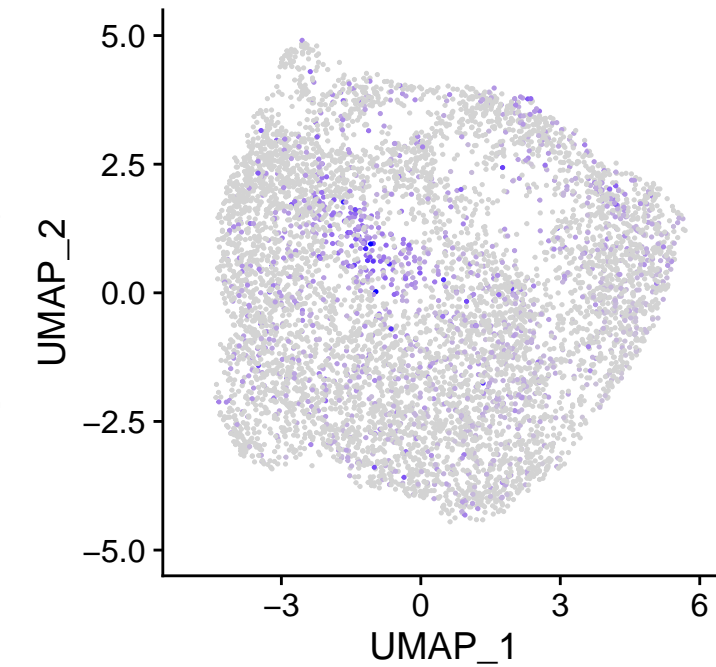**IFI44**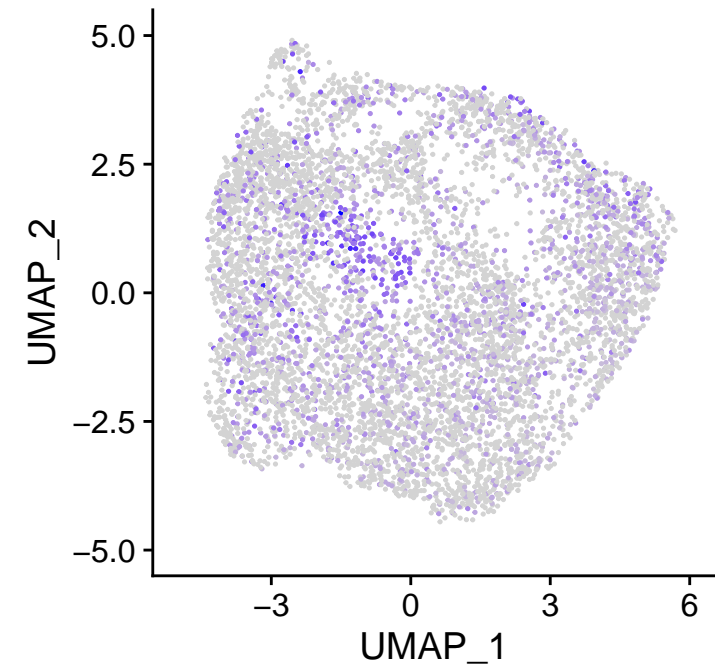**ENSCAFG00000016252**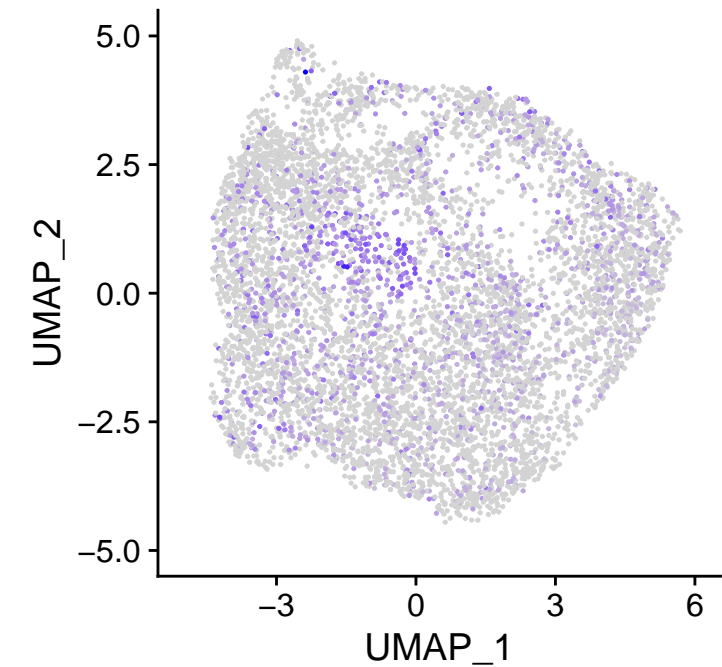**ENSCAFG00000025115**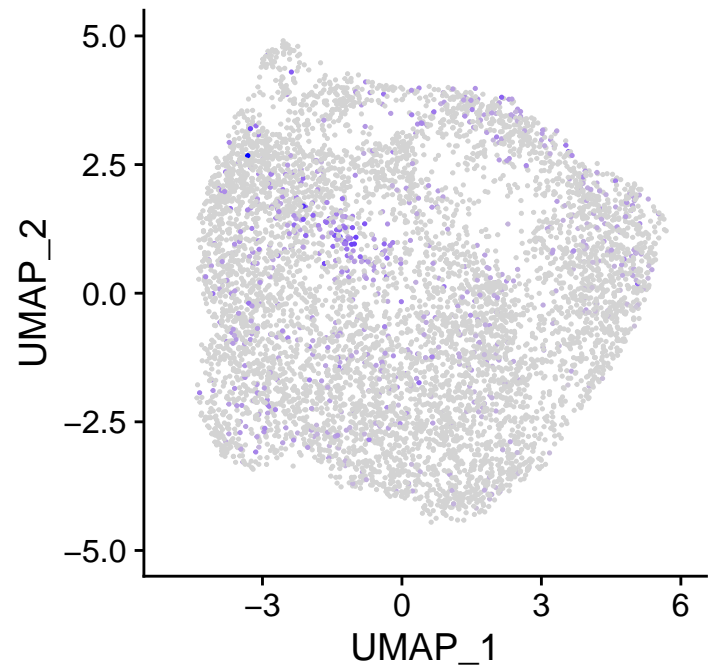**RSAD2**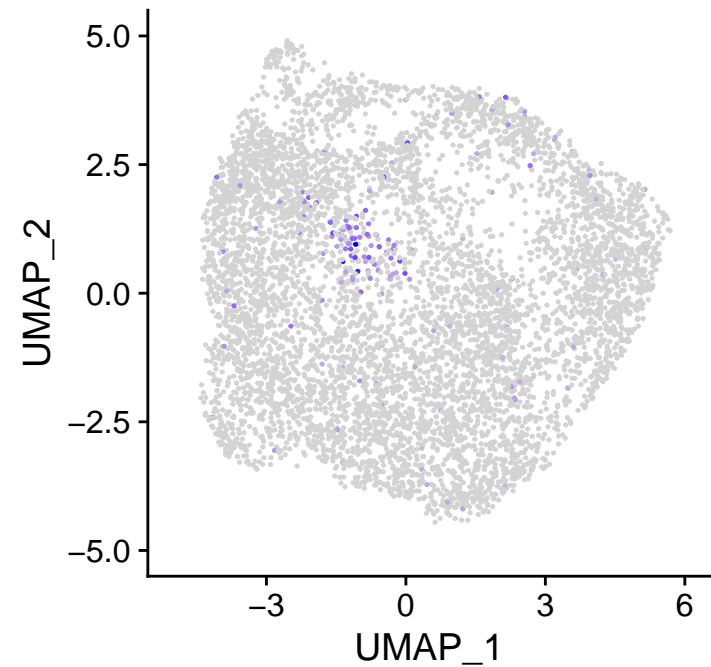**ISG20**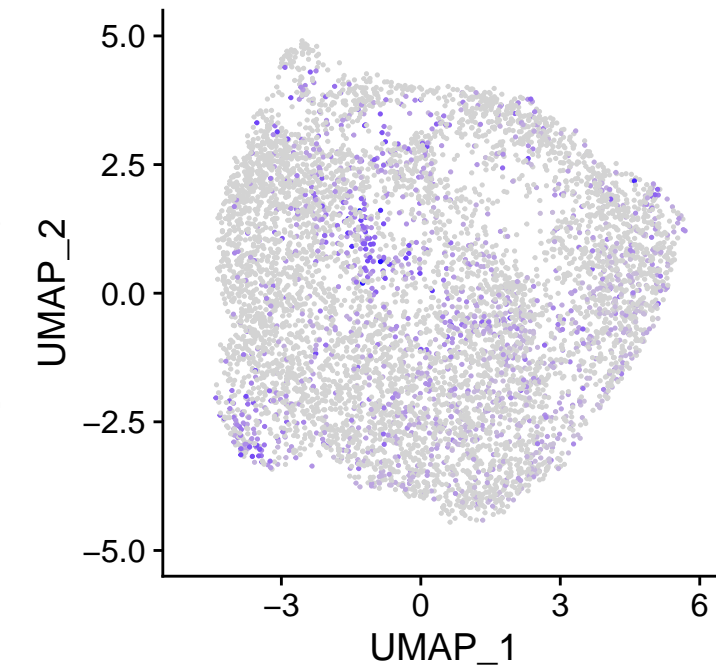**IFI6**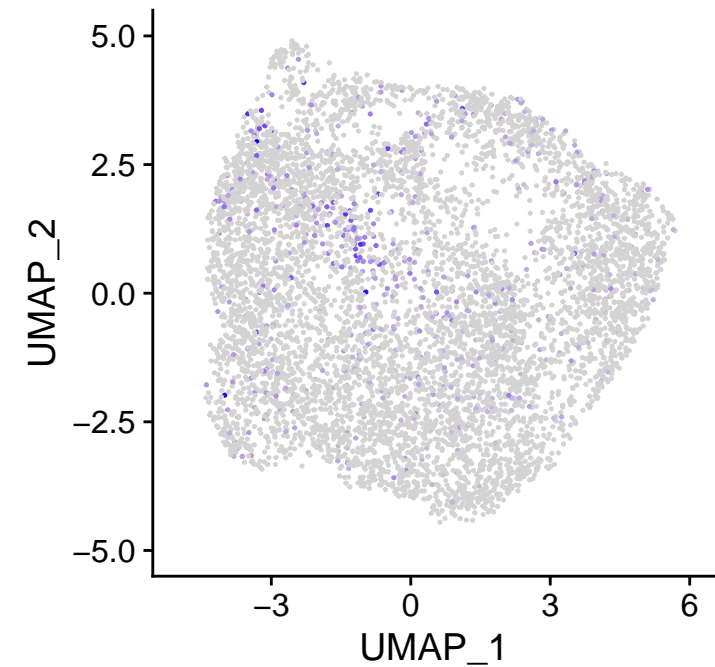



**GCSH**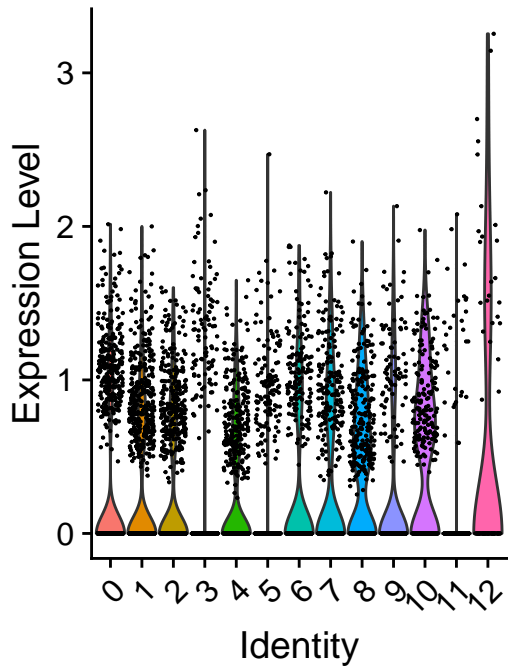**FAM204A**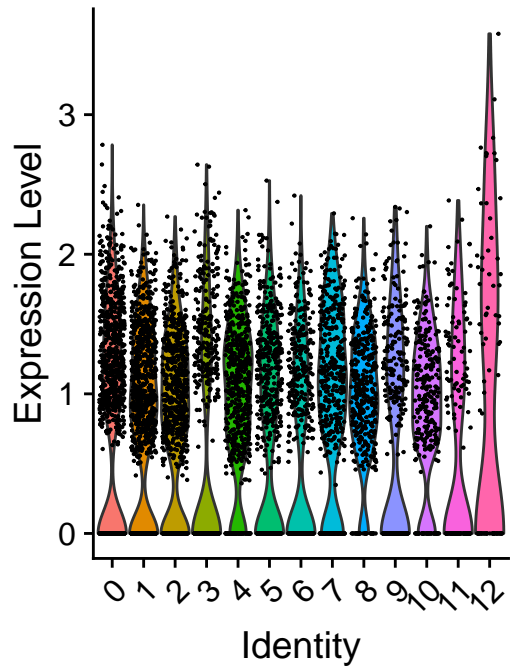**NDUFB4**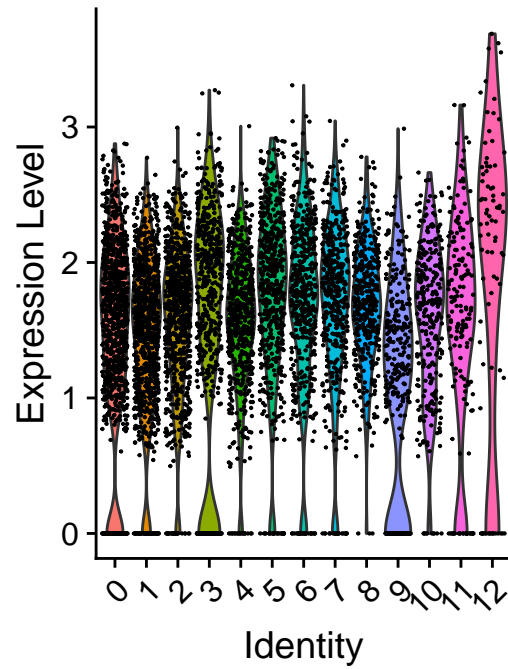**RPL22**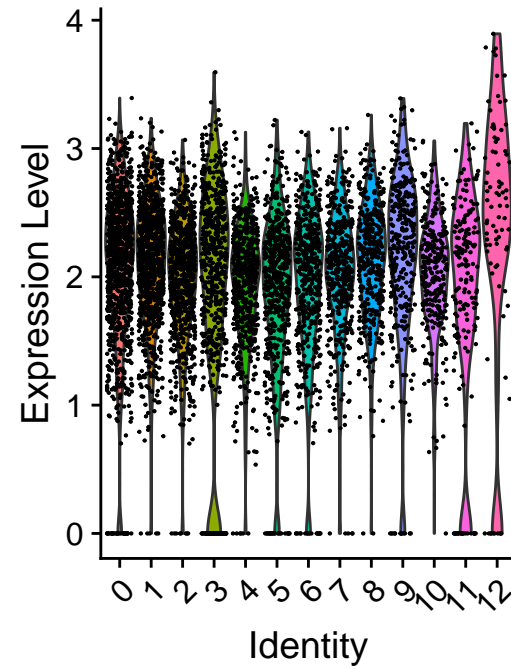**NDUFB11**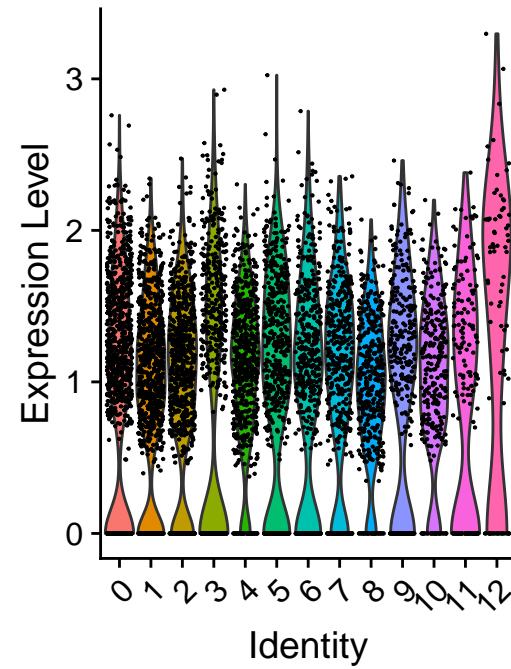**ATP5IF1**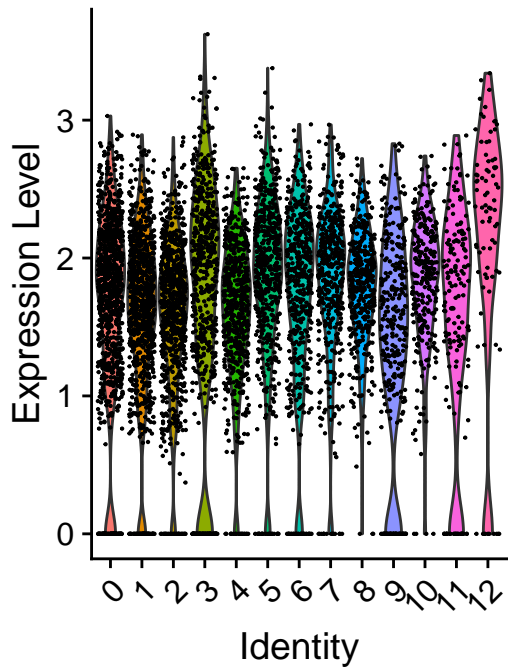**TBCA**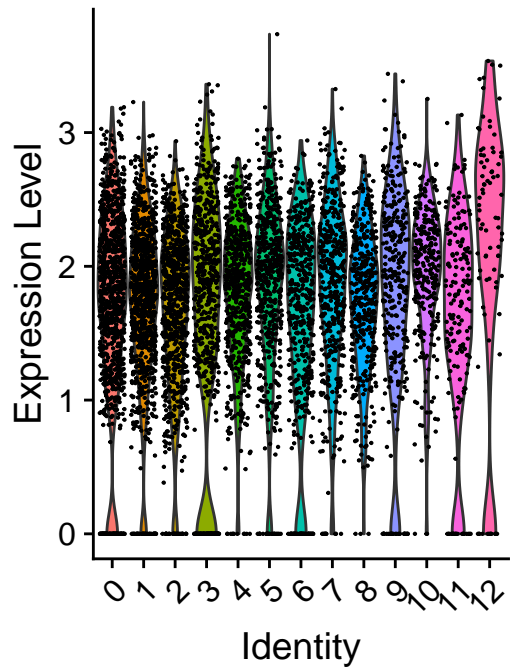**ENSCAFG00000031706**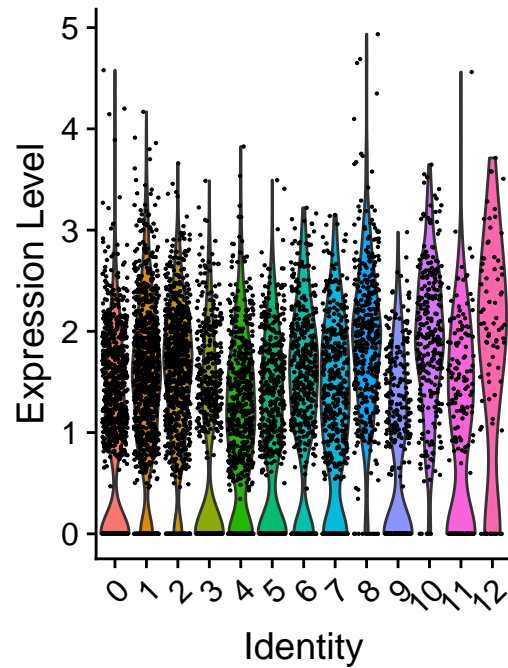**SAA1**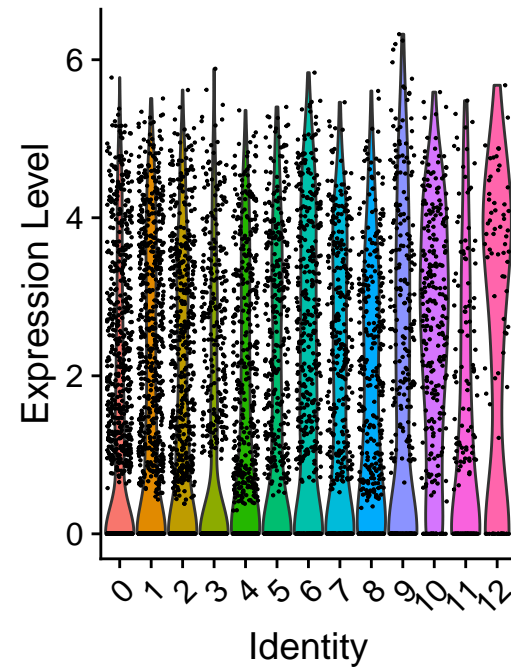**ENSCAFG00000015206**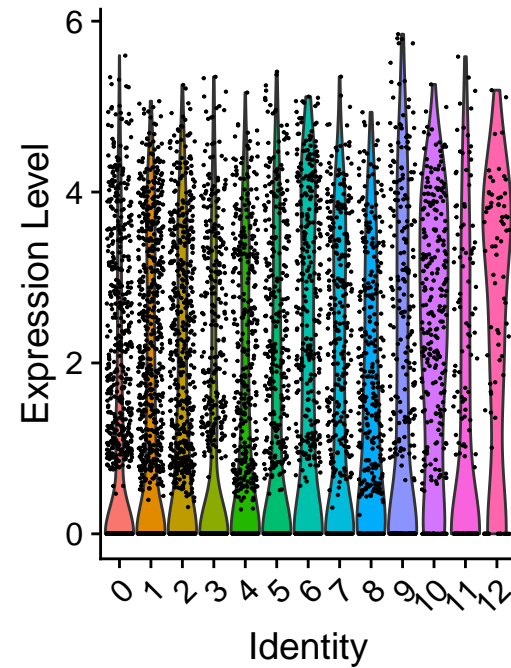



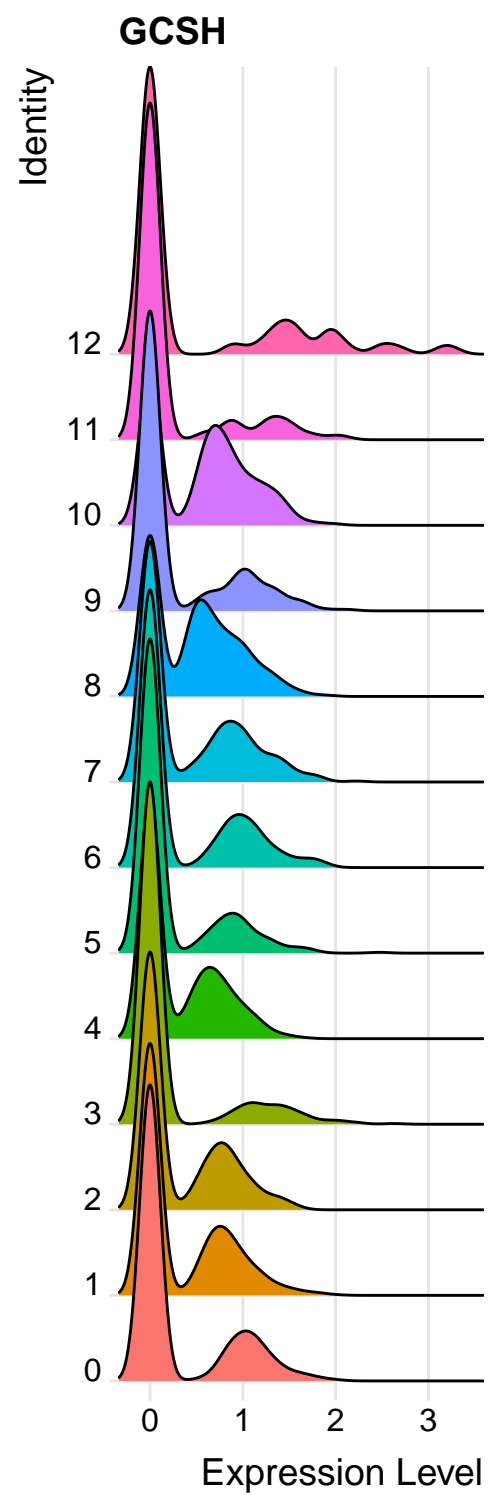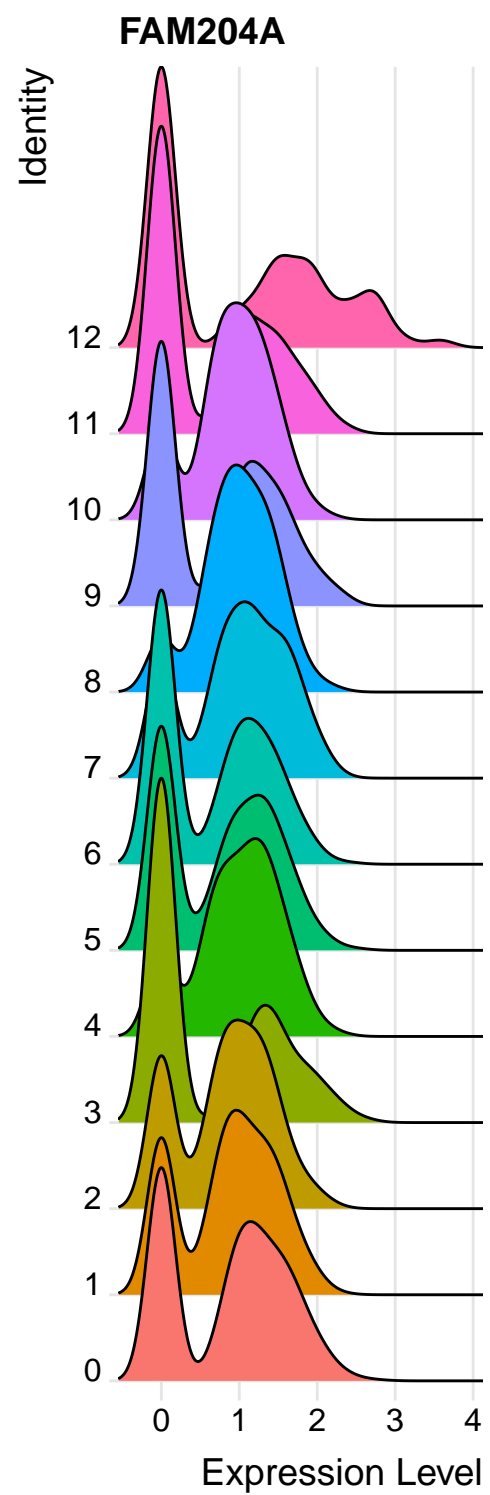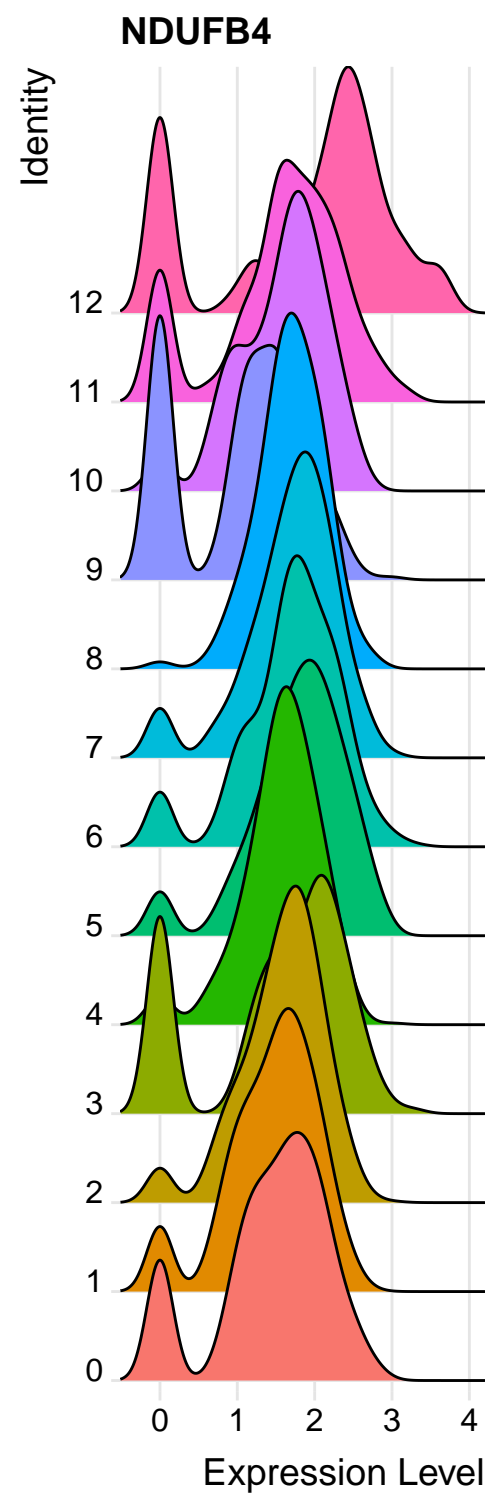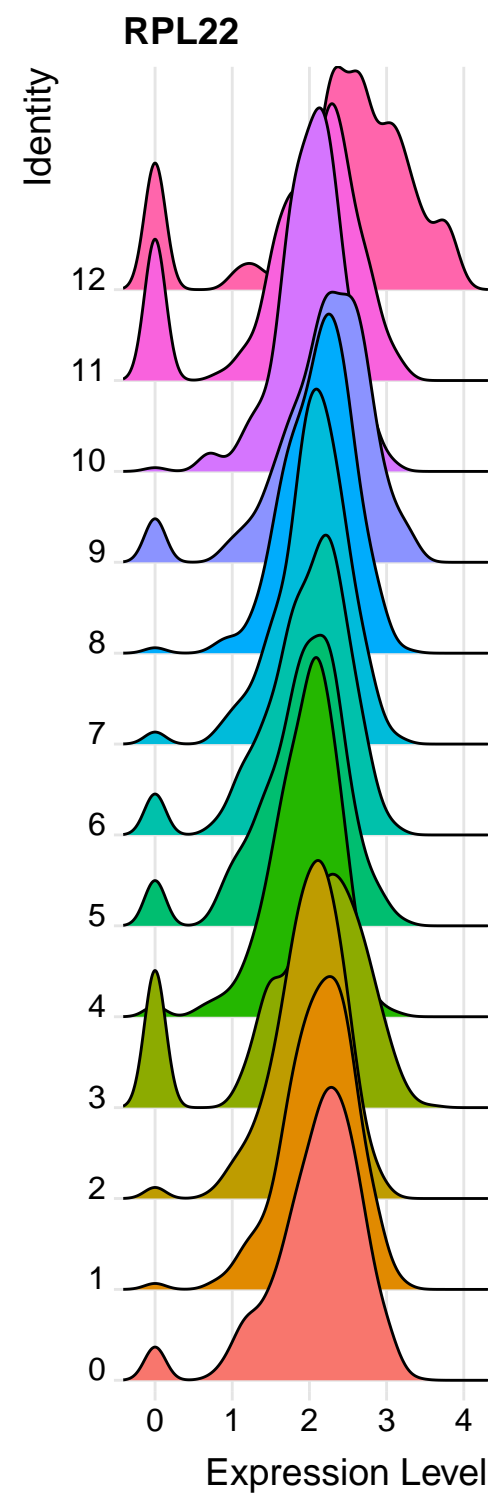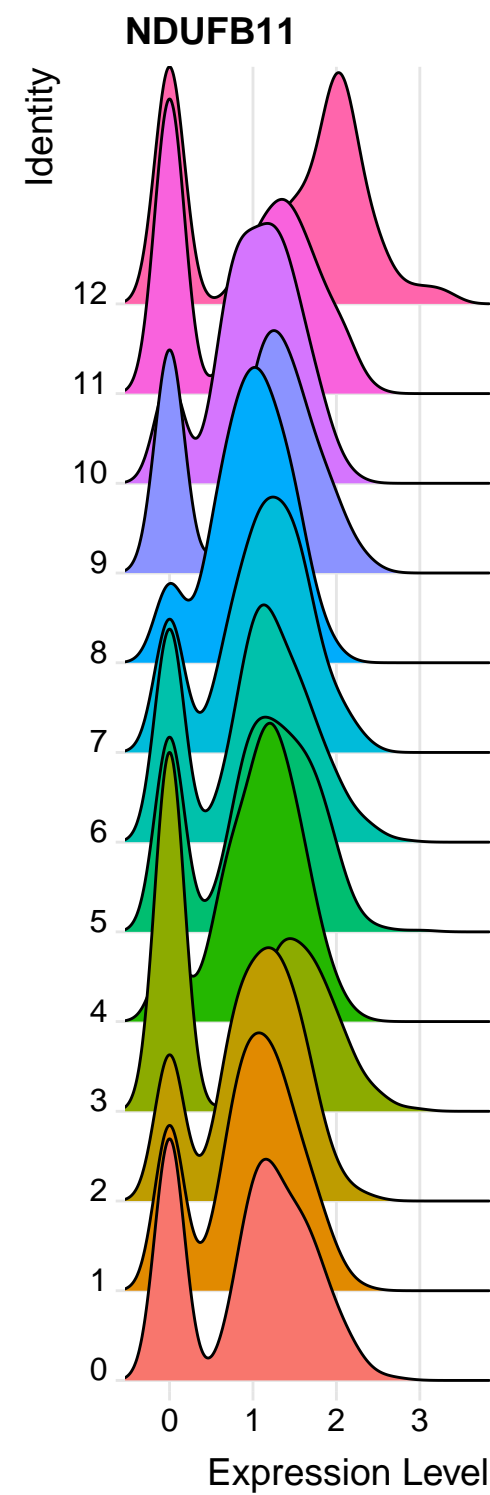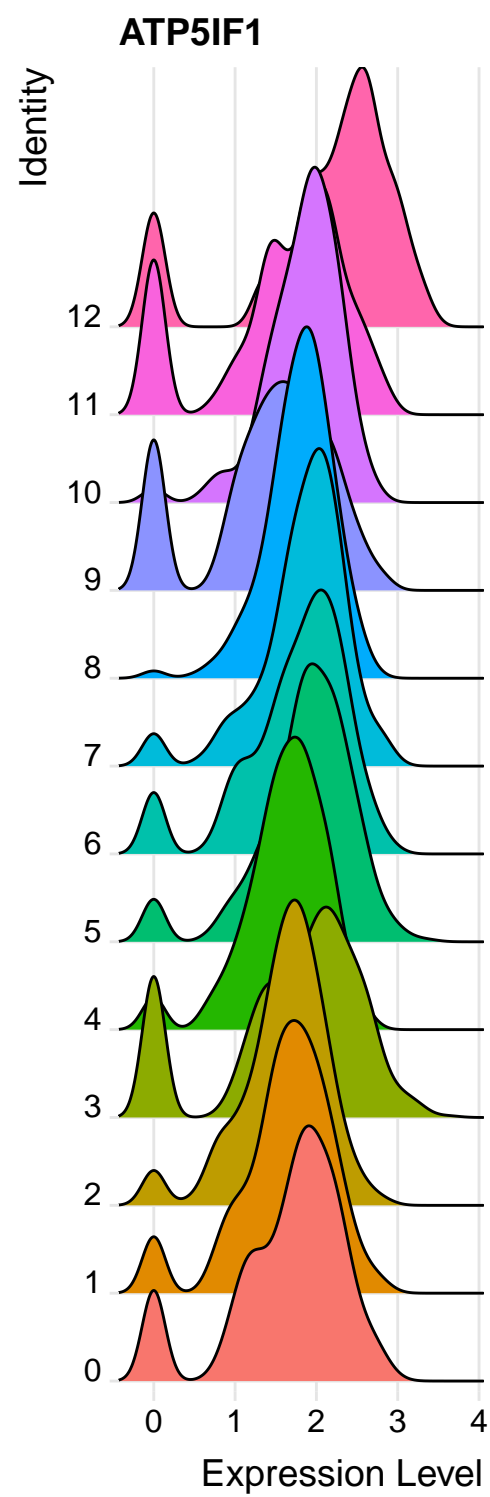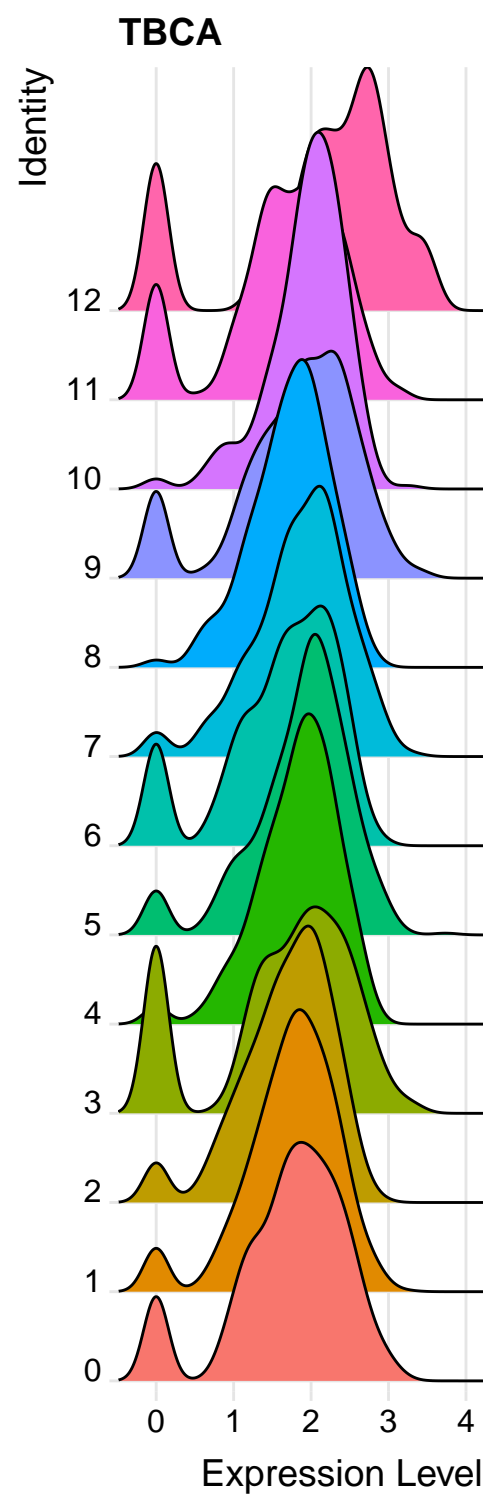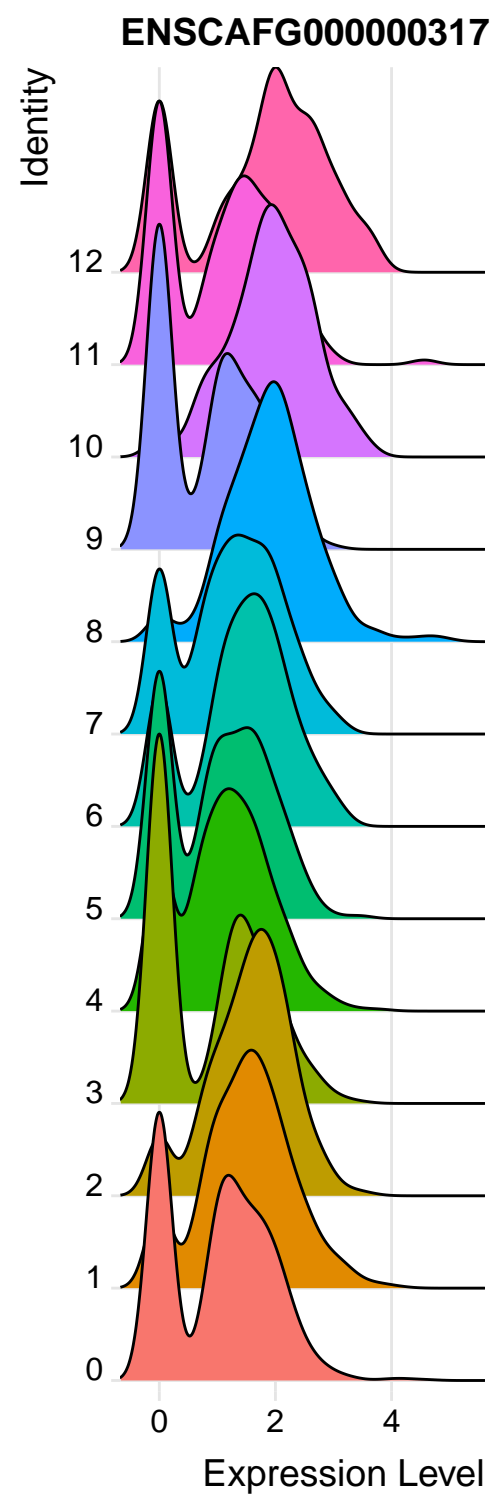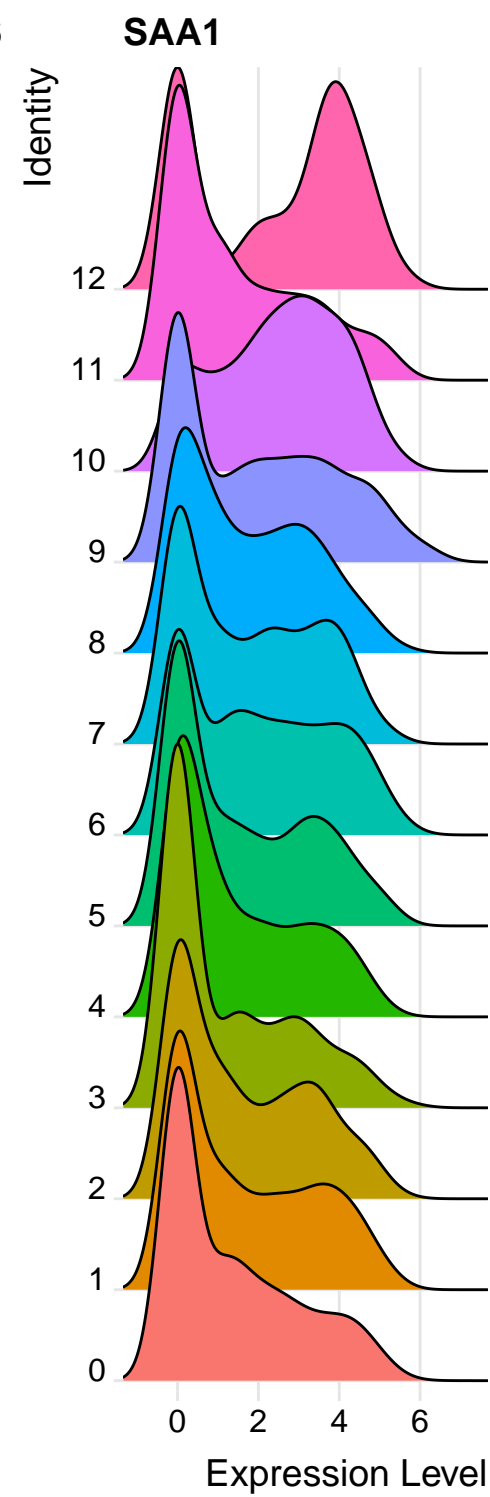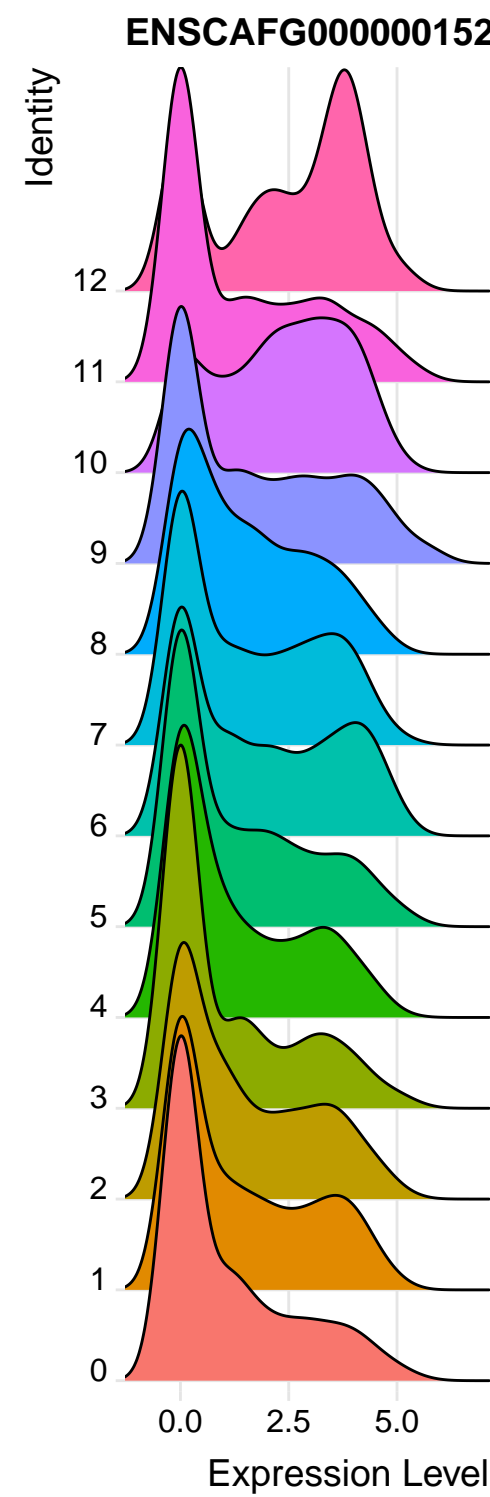



**GCSH**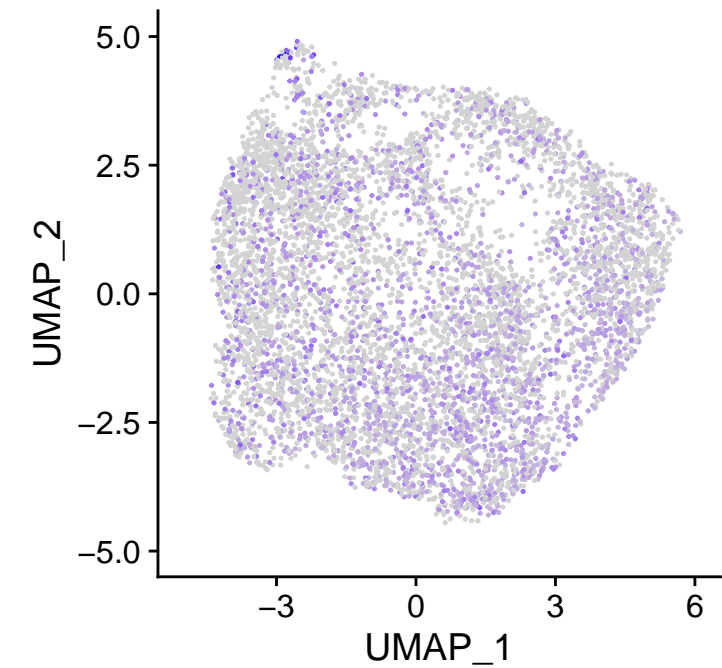**FAM204A**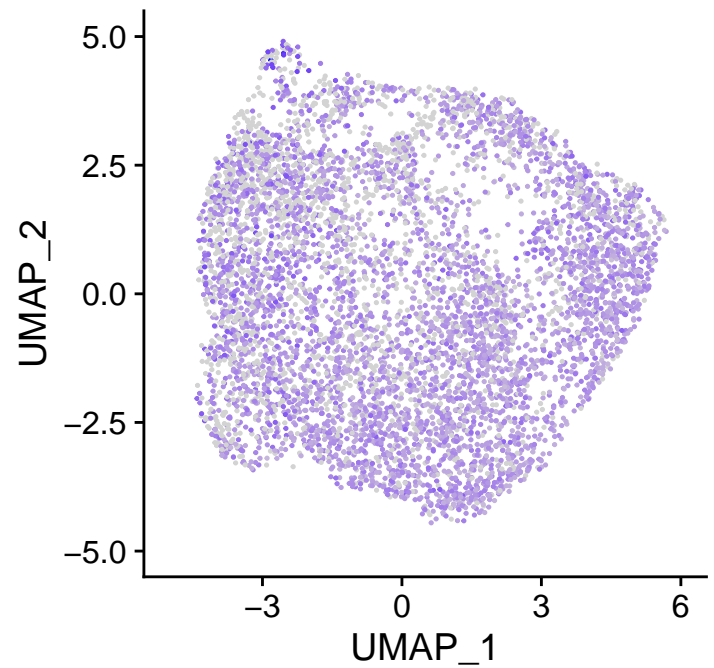**NDUFB4**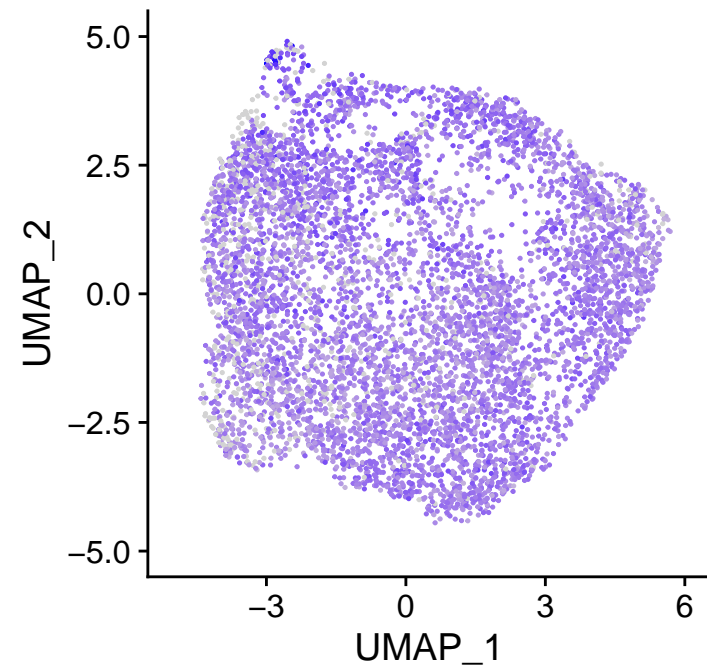**RPL22**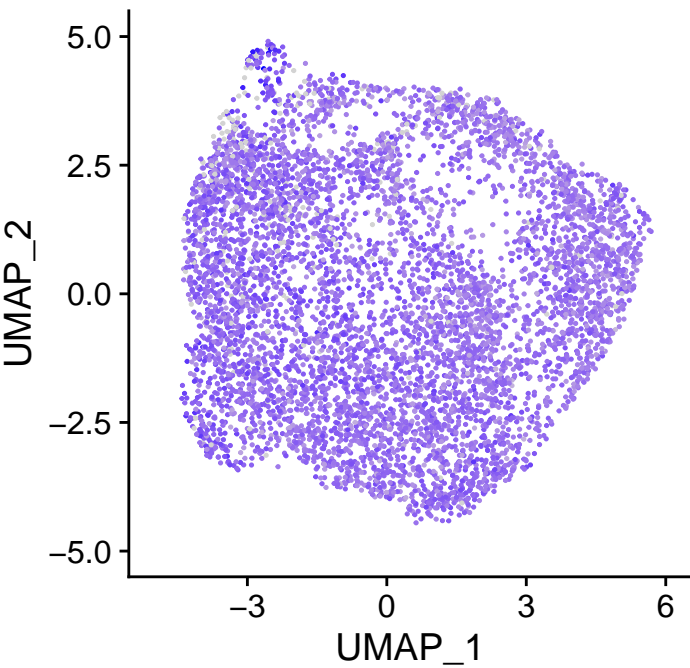**NDUFB11**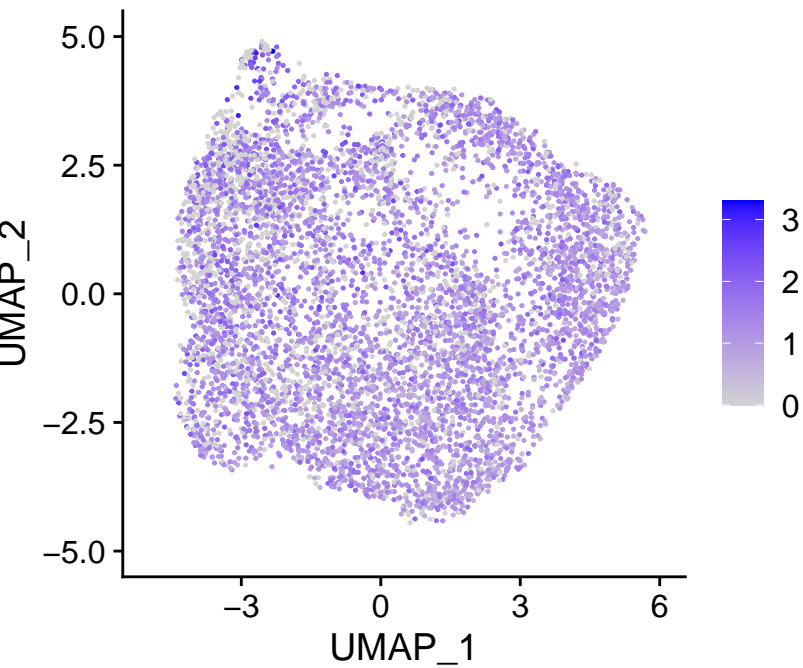**ATP5IF1**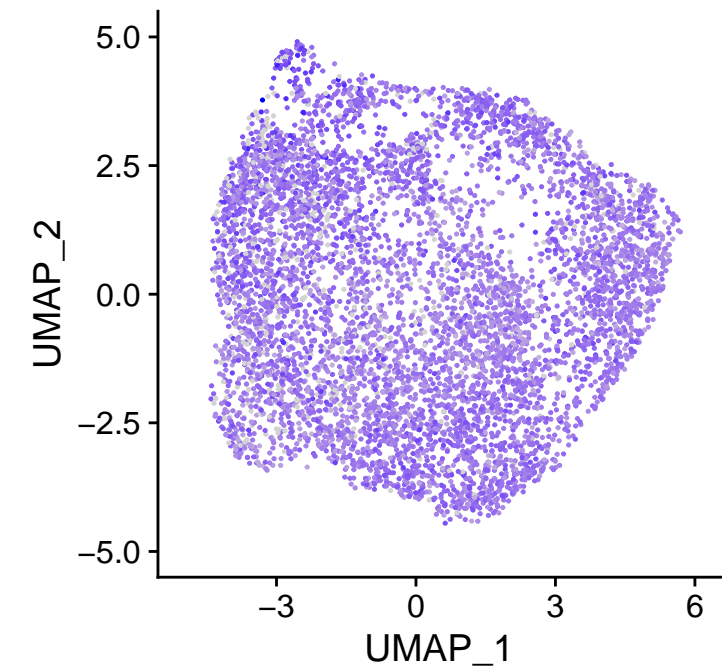**TBCA**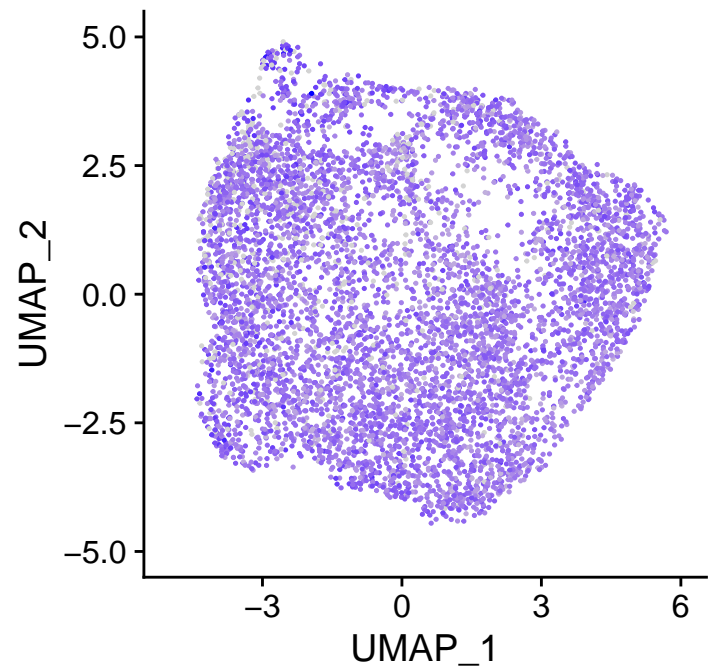**ENSCAFG00000031706**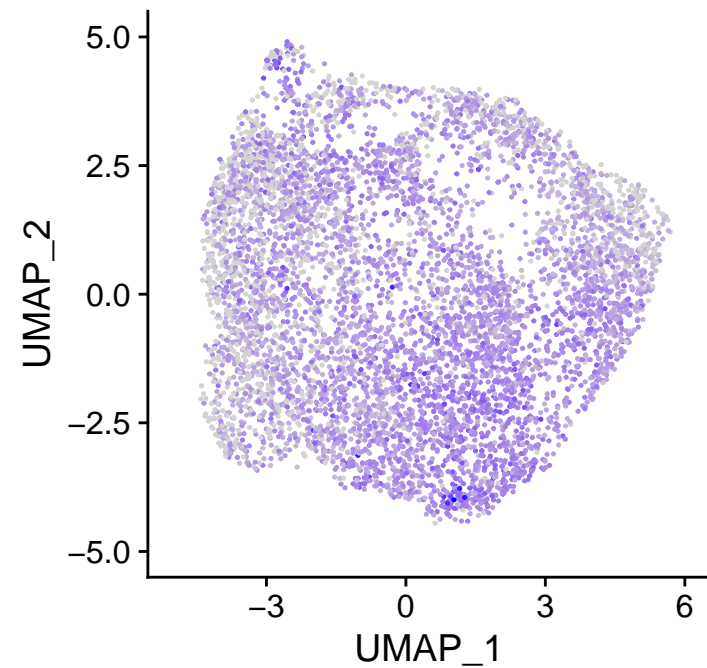**SAA1**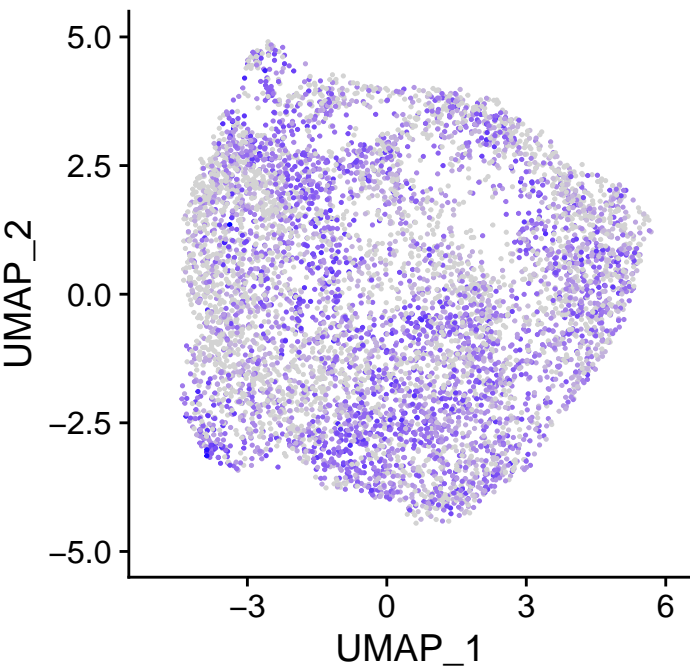**ENSCAFG00000015206**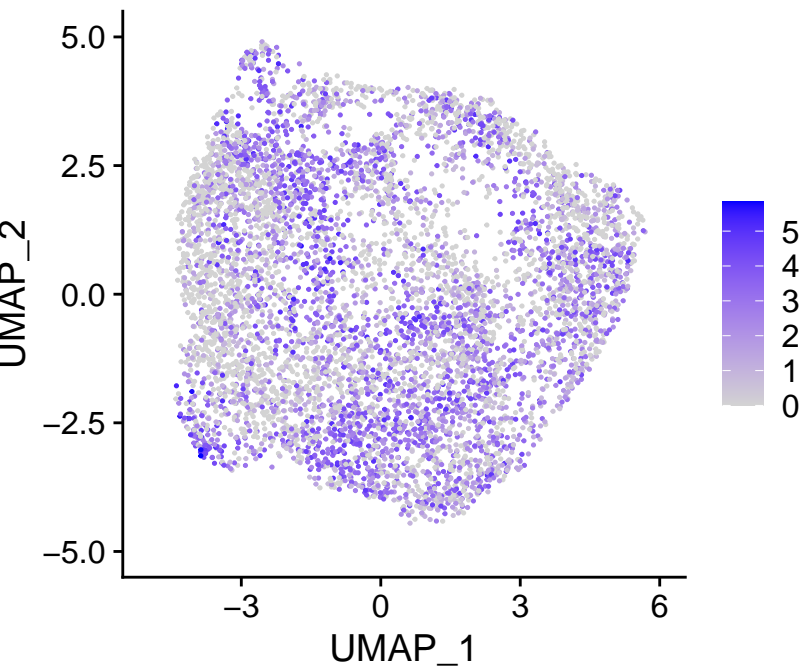

Supplement: 13287_2024_4067_MOESM15_ESM.pdf [file 13287_2024_4067_MOESM15_ESM.pdf]
