# Supplementary material for: Knockout of B2M in combination with PD-L1 overexpression protects MSC-derived new islet β cells from graft rejection in the treatment of canine diabetes mellitus
Source: PubMed Central journal article supplement — Stem Cell Res Ther. 2024 Dec 2;15:458. doi: 10.1186/s13287-024-04067-7 (PMC11613808; doi:10.1186/s13287-024-04067-7), 2024-12-02

# GO Enrichment BarPlot

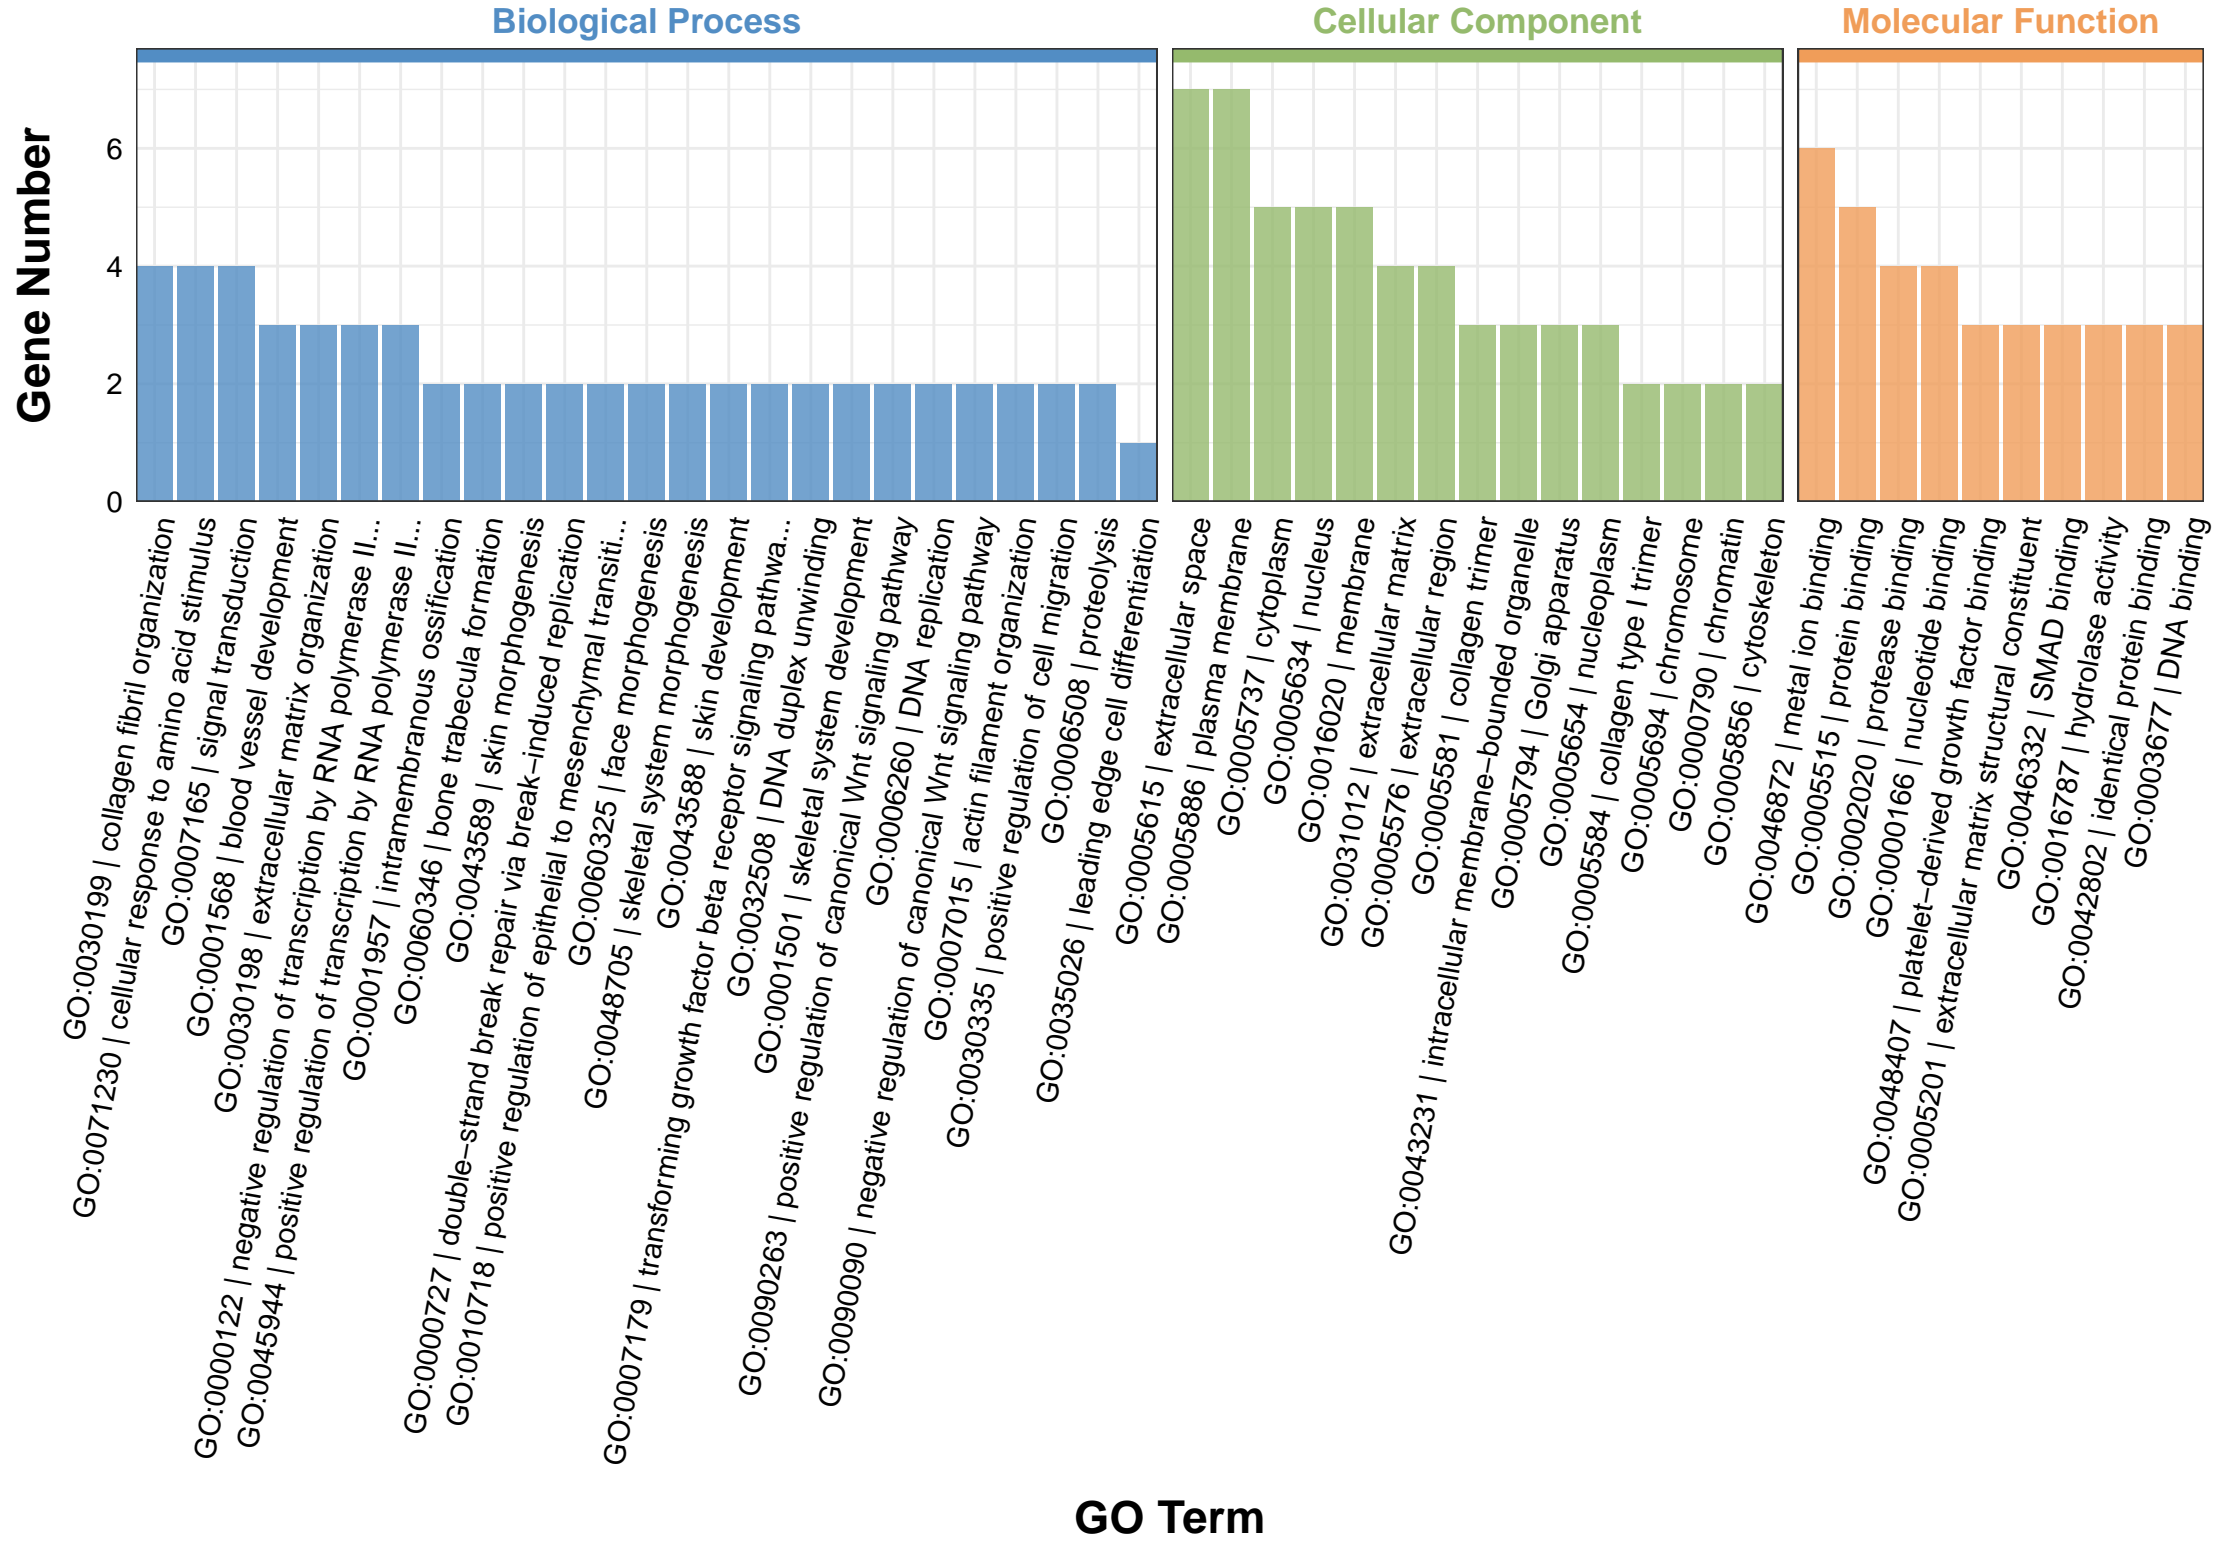

# GO Enrichment ScatterPlot

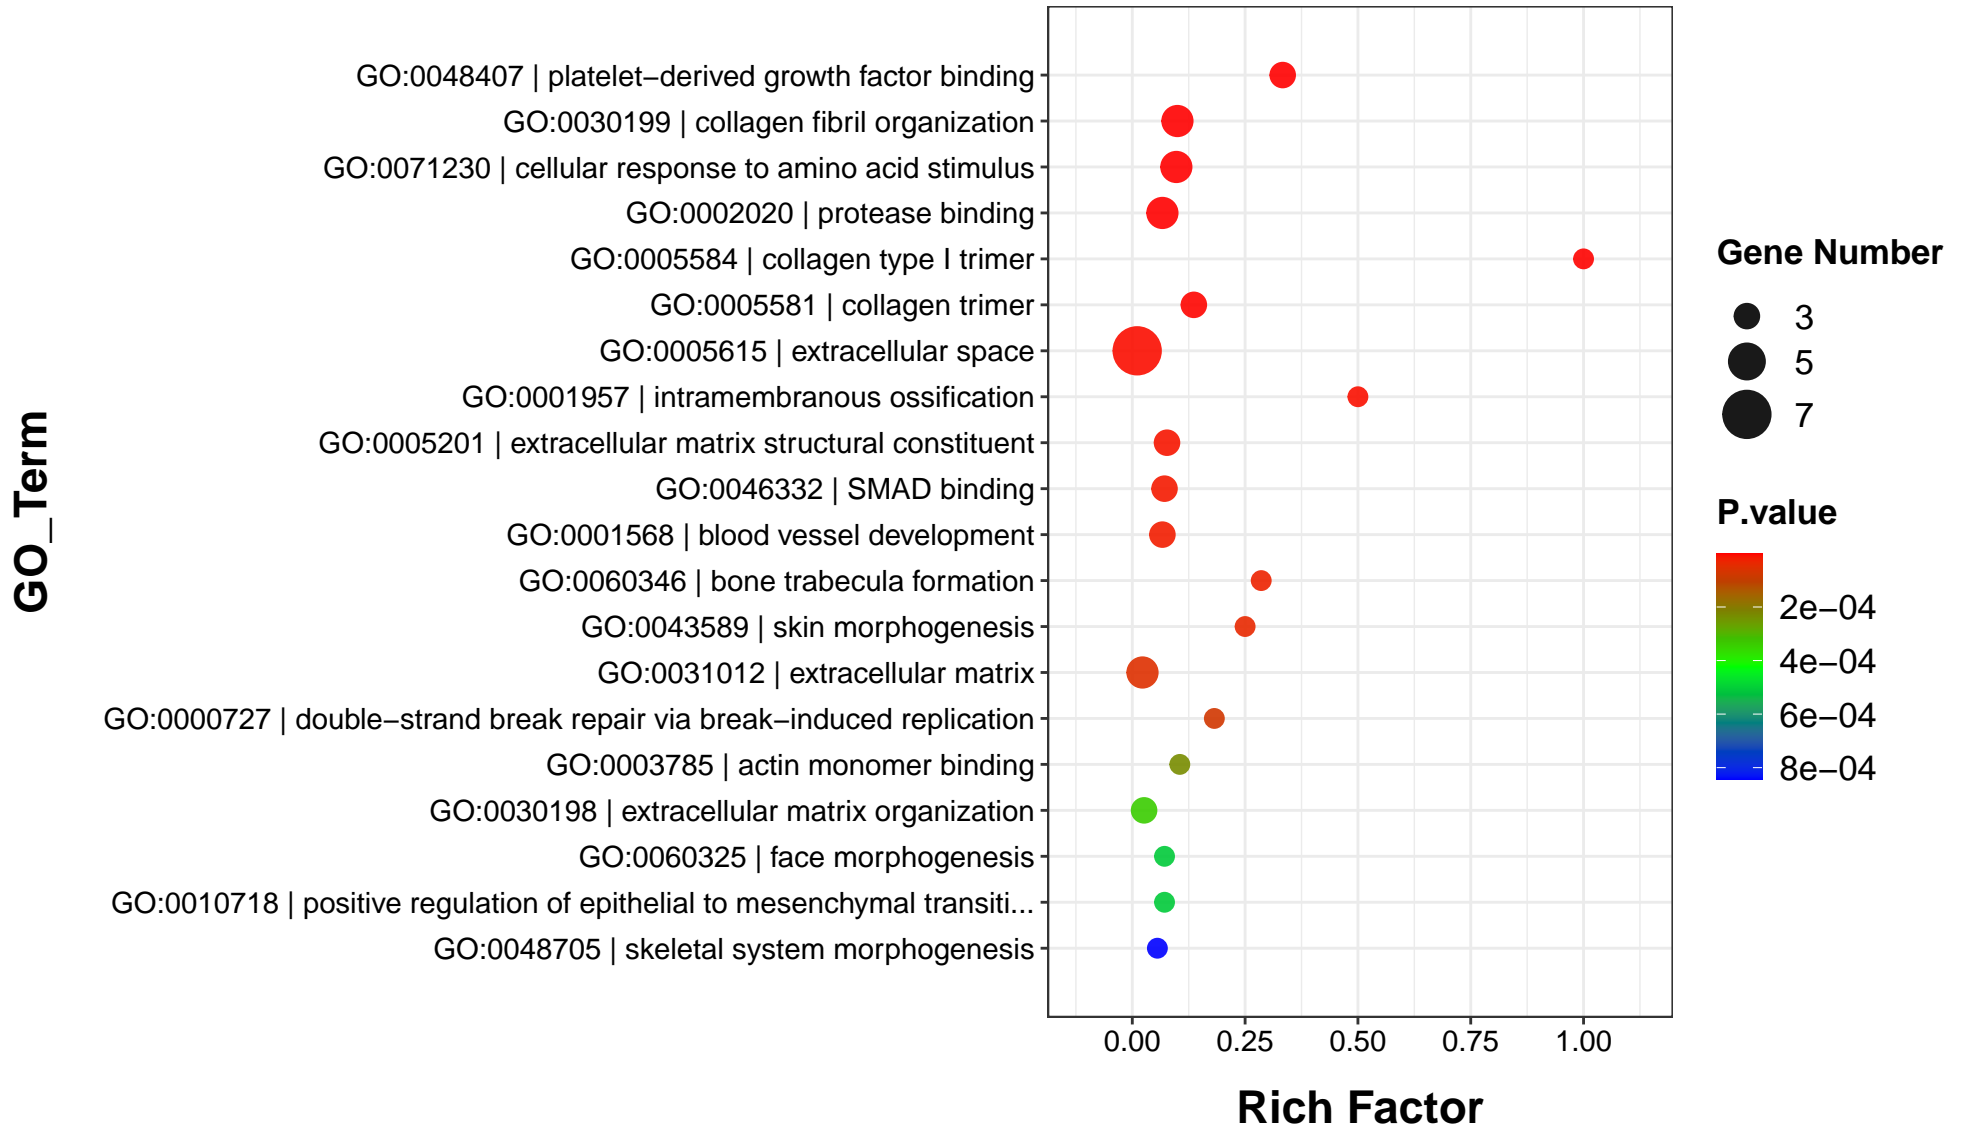

# KEGG Enrichment BarPlot

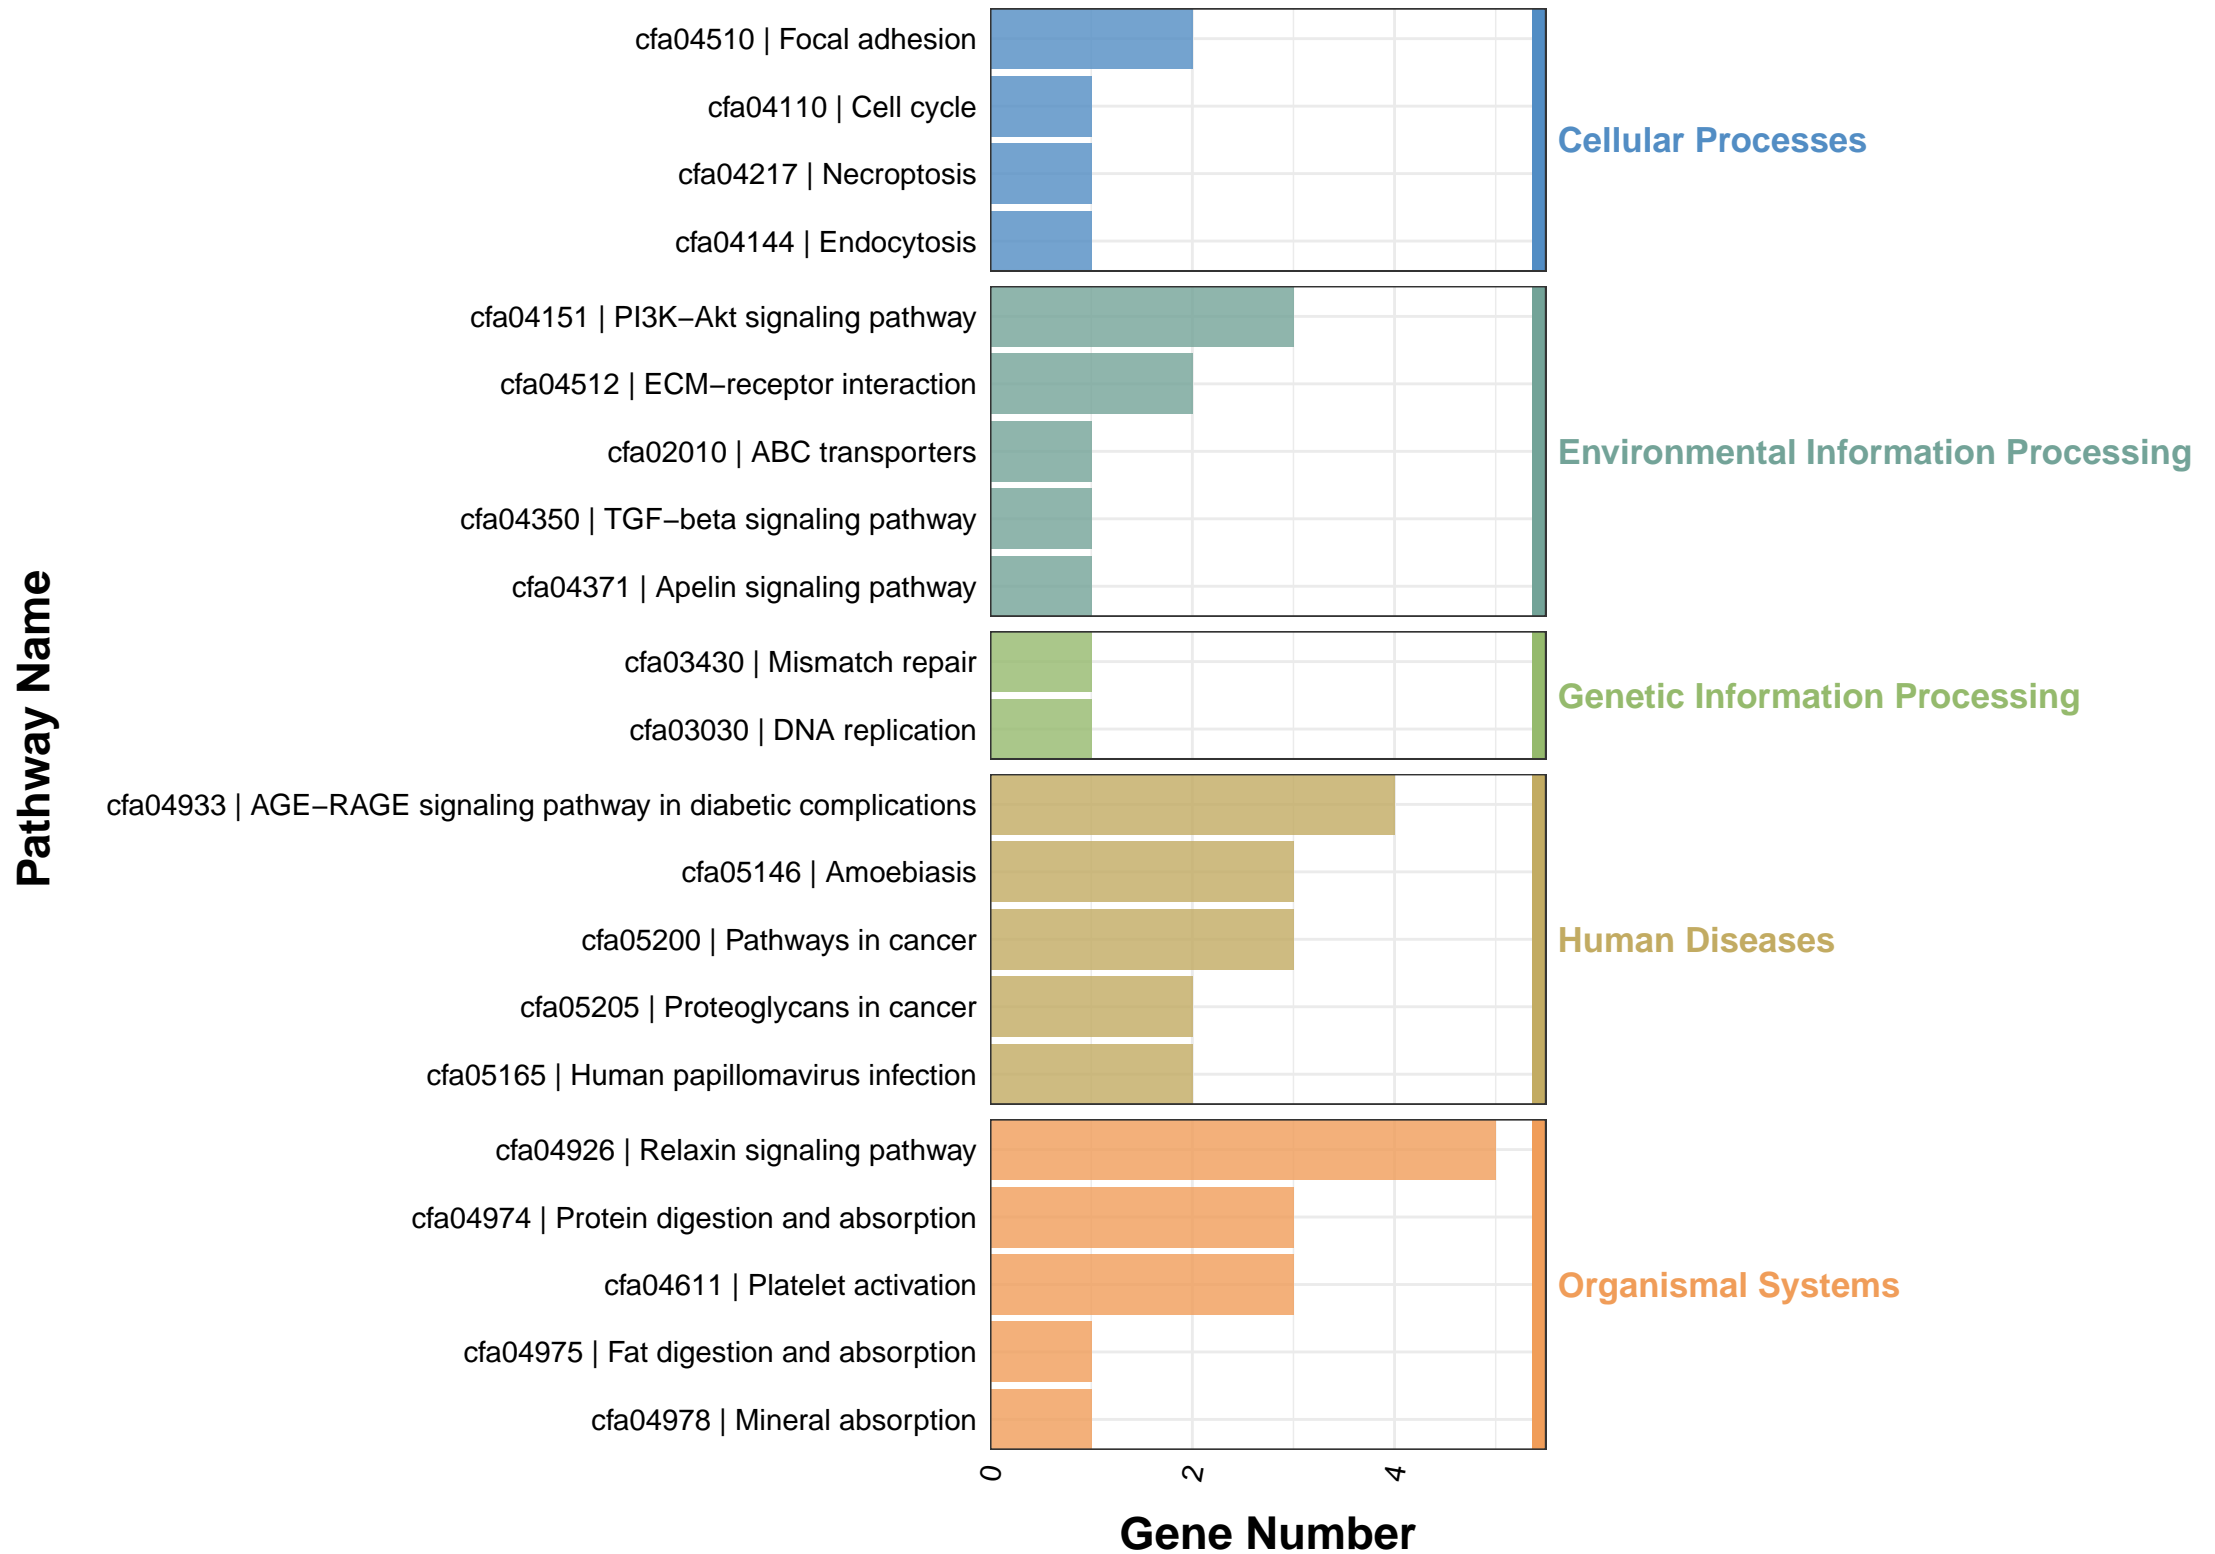

# KEGG Enrichment ScatterPlot

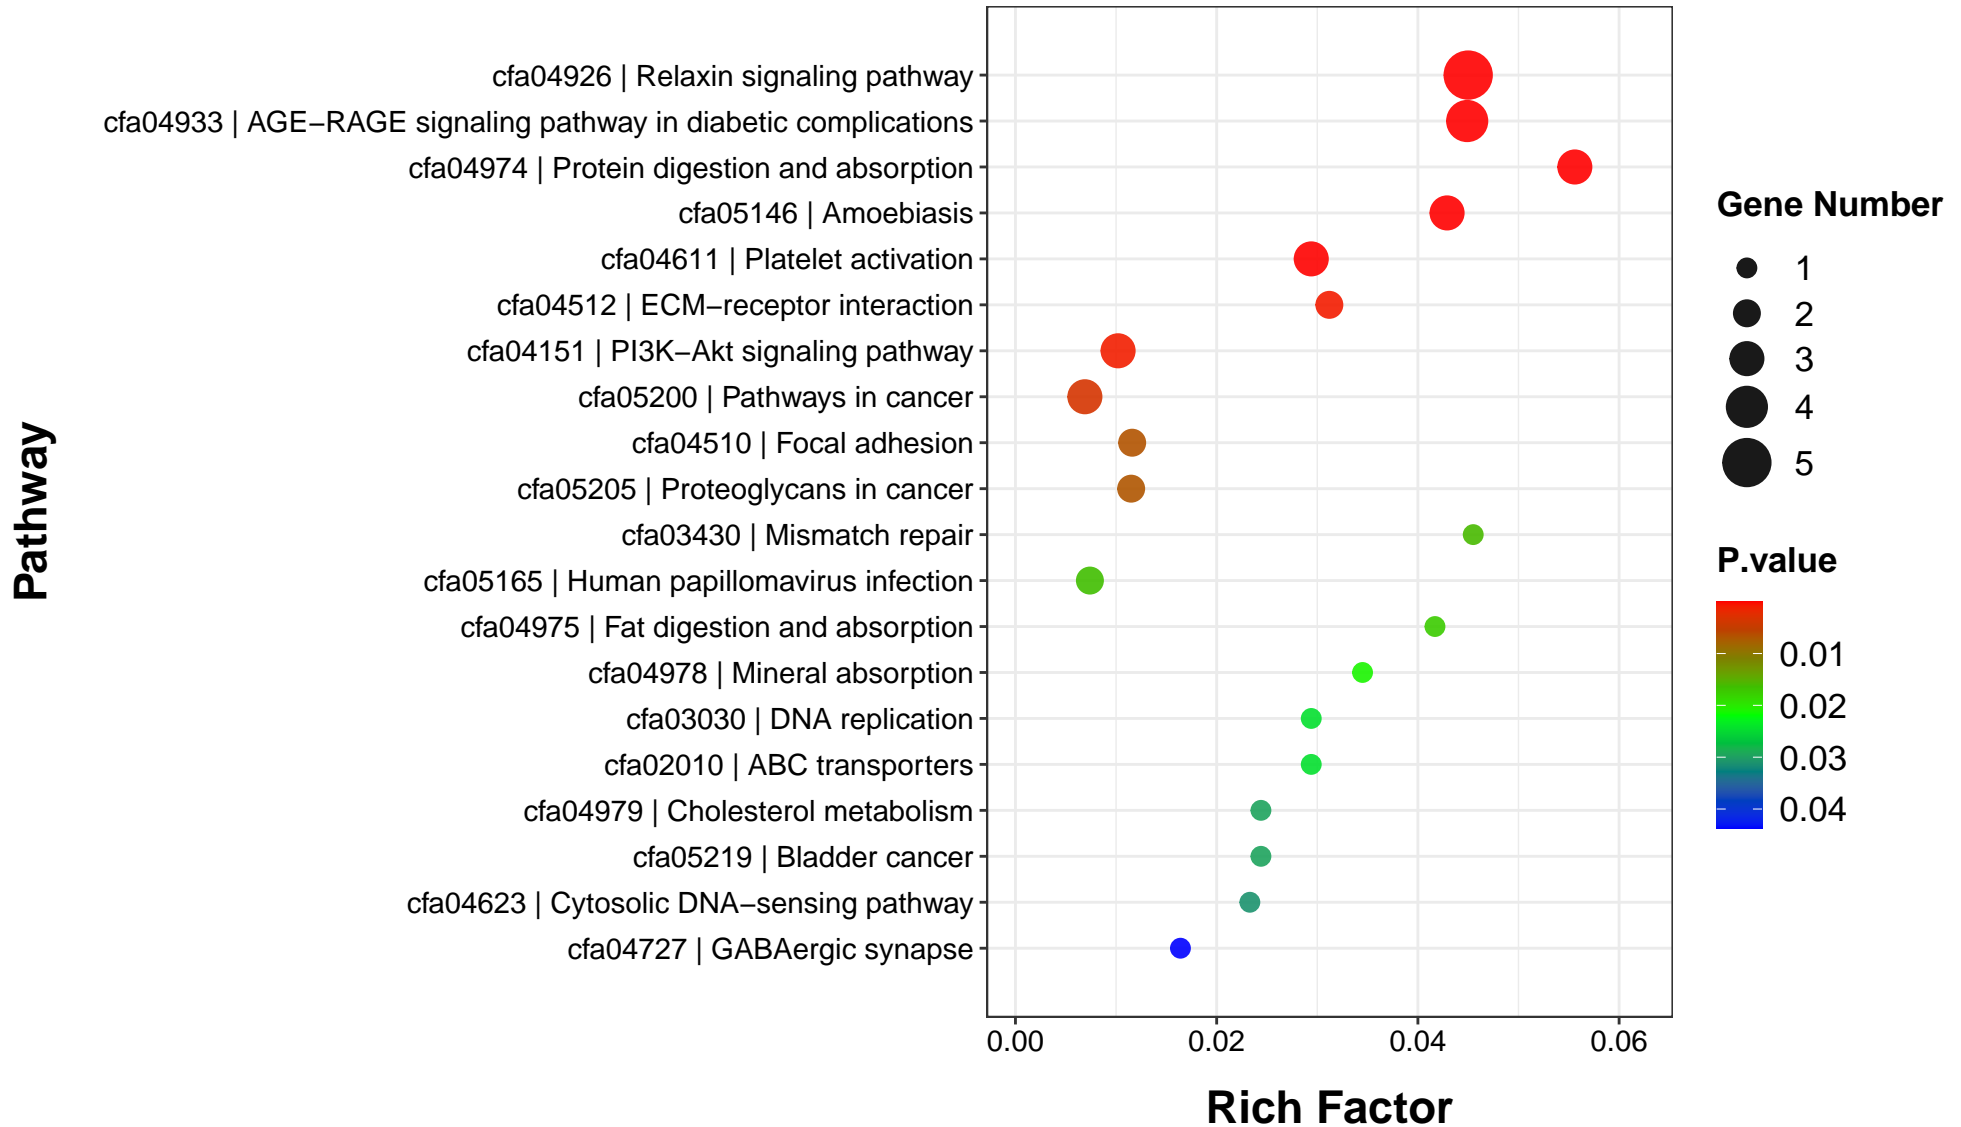

# GO Enrichment BarPlot

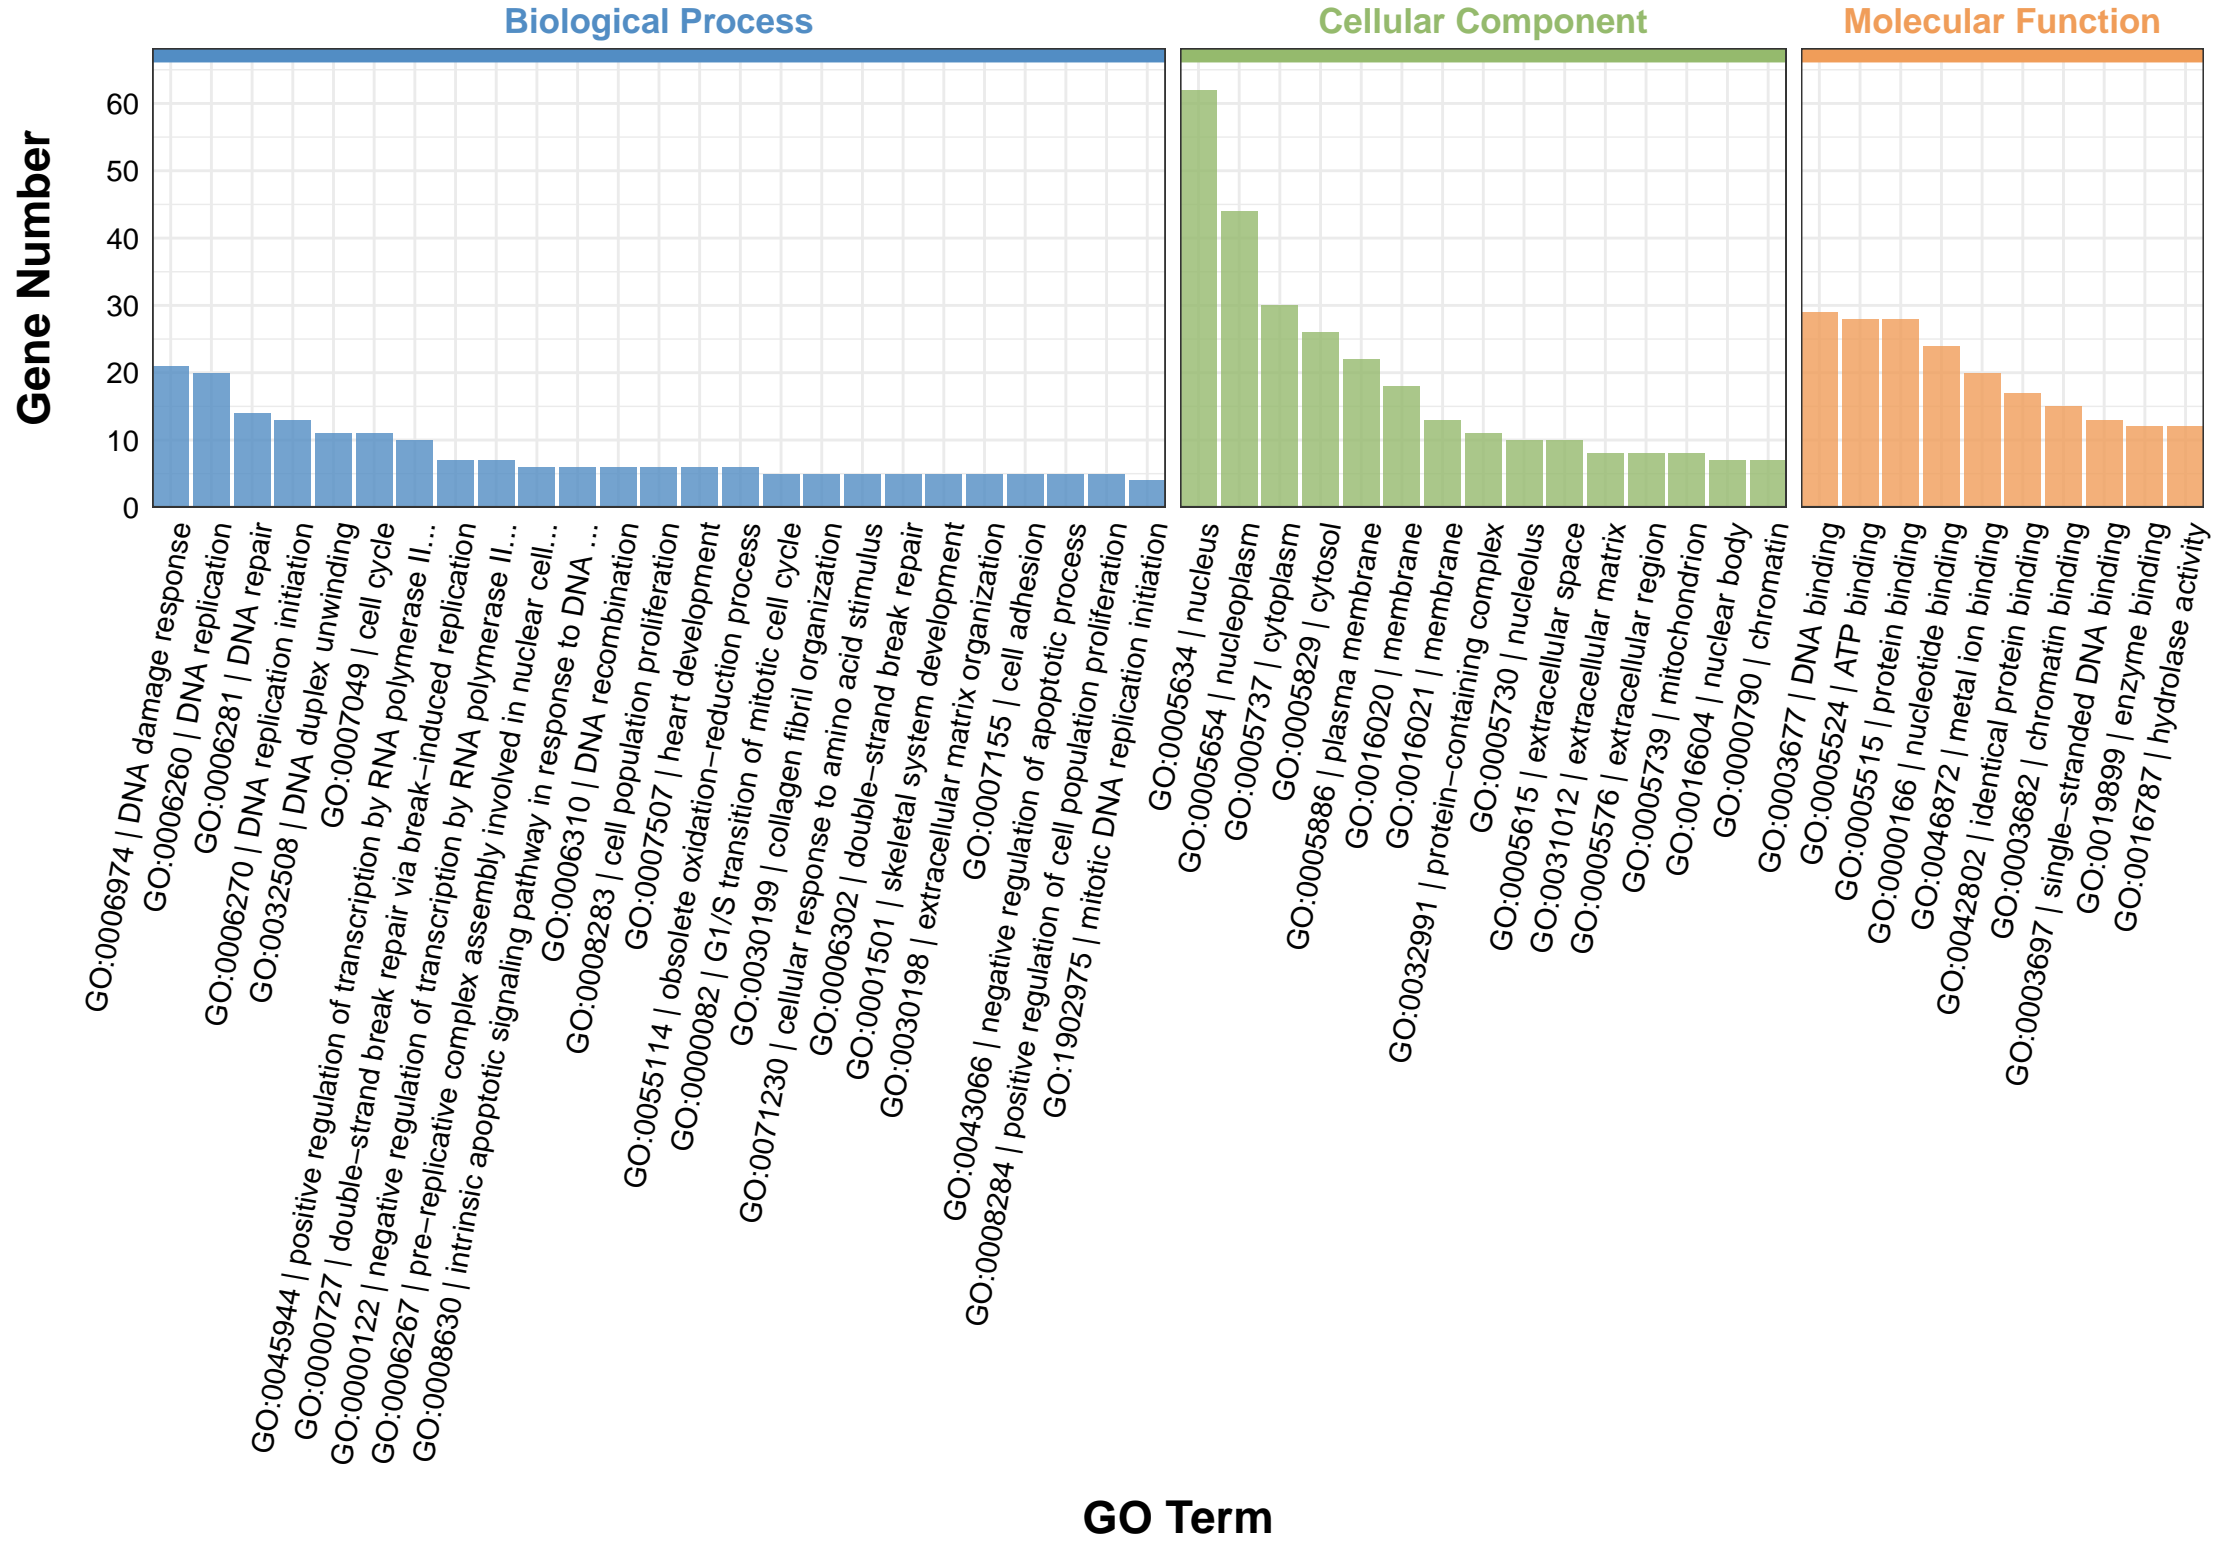

# GO Enrichment ScatterPlot

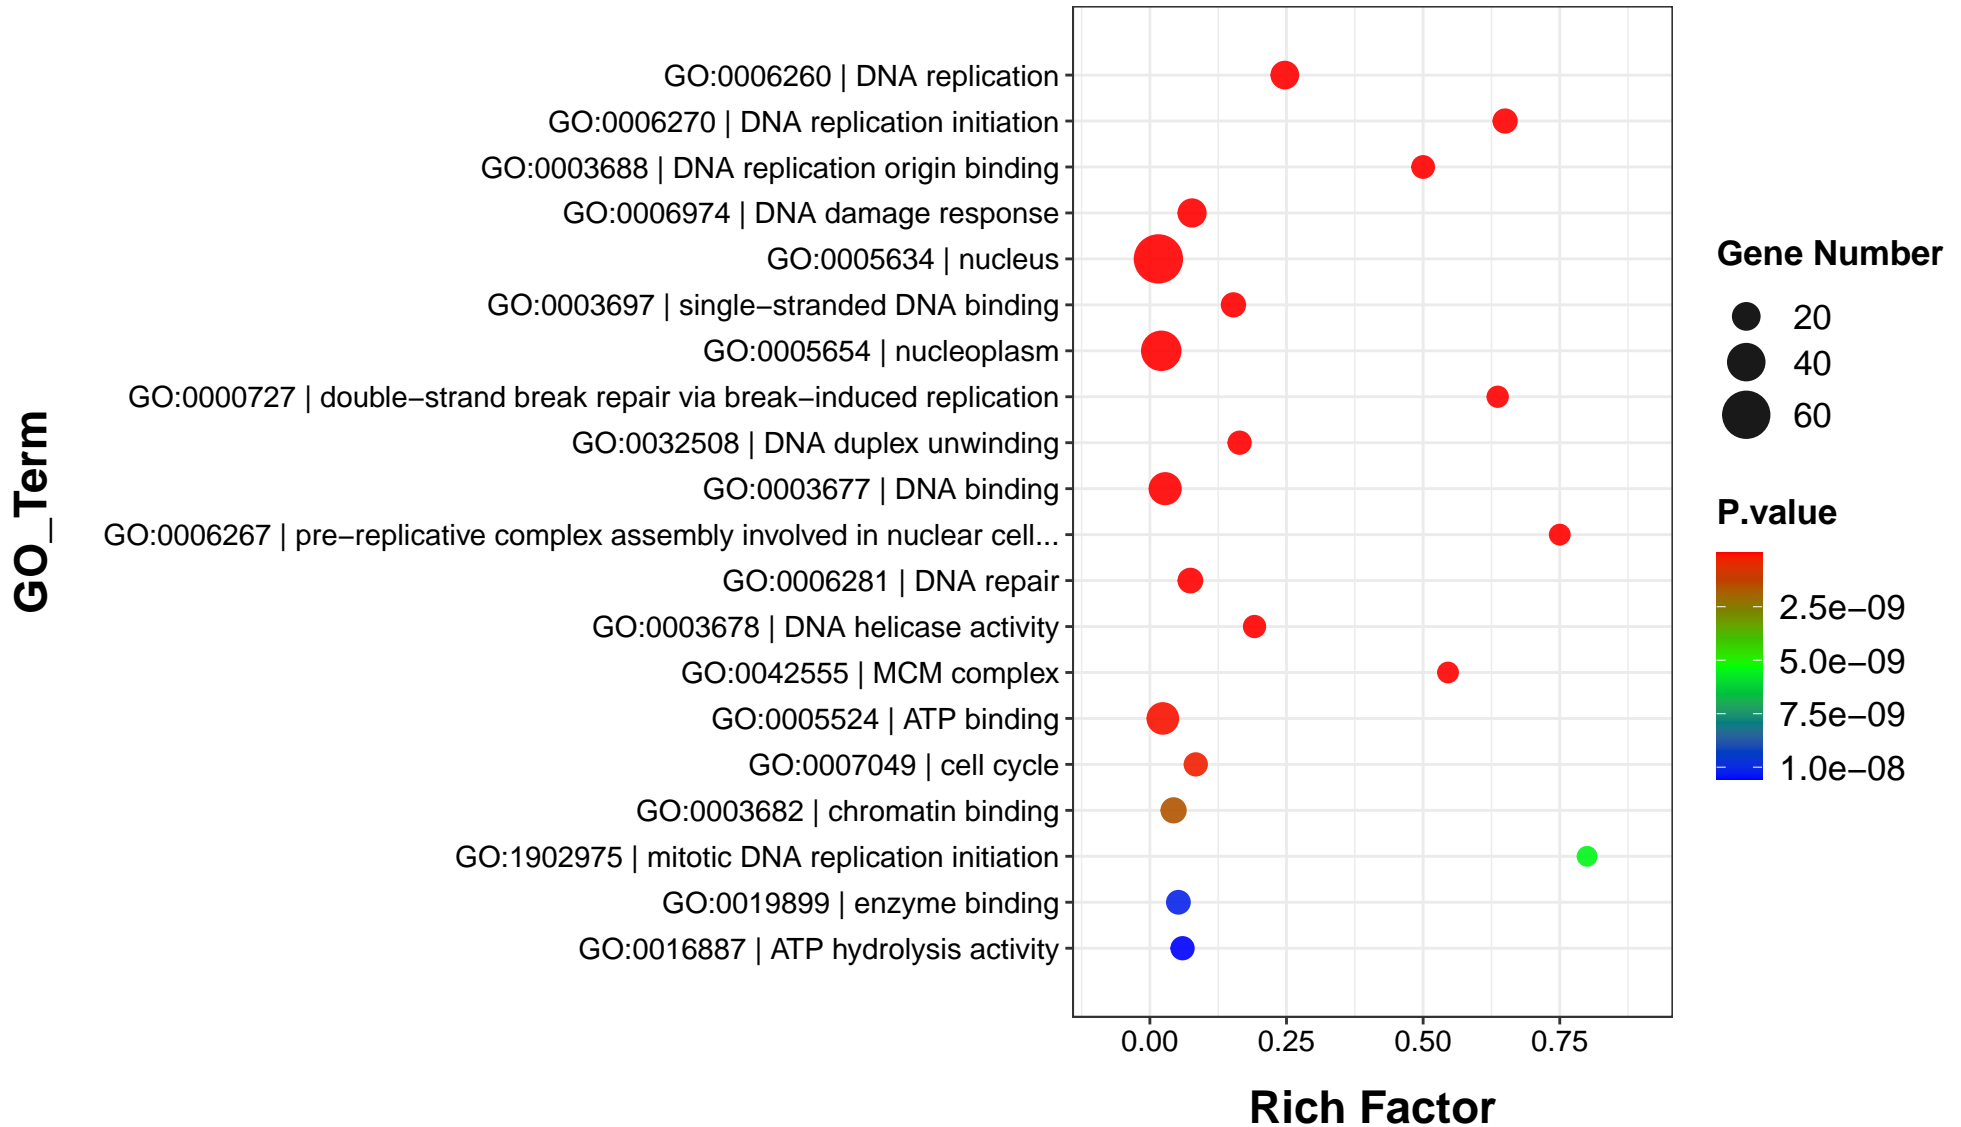

# KEGG Enrichment BarPlot

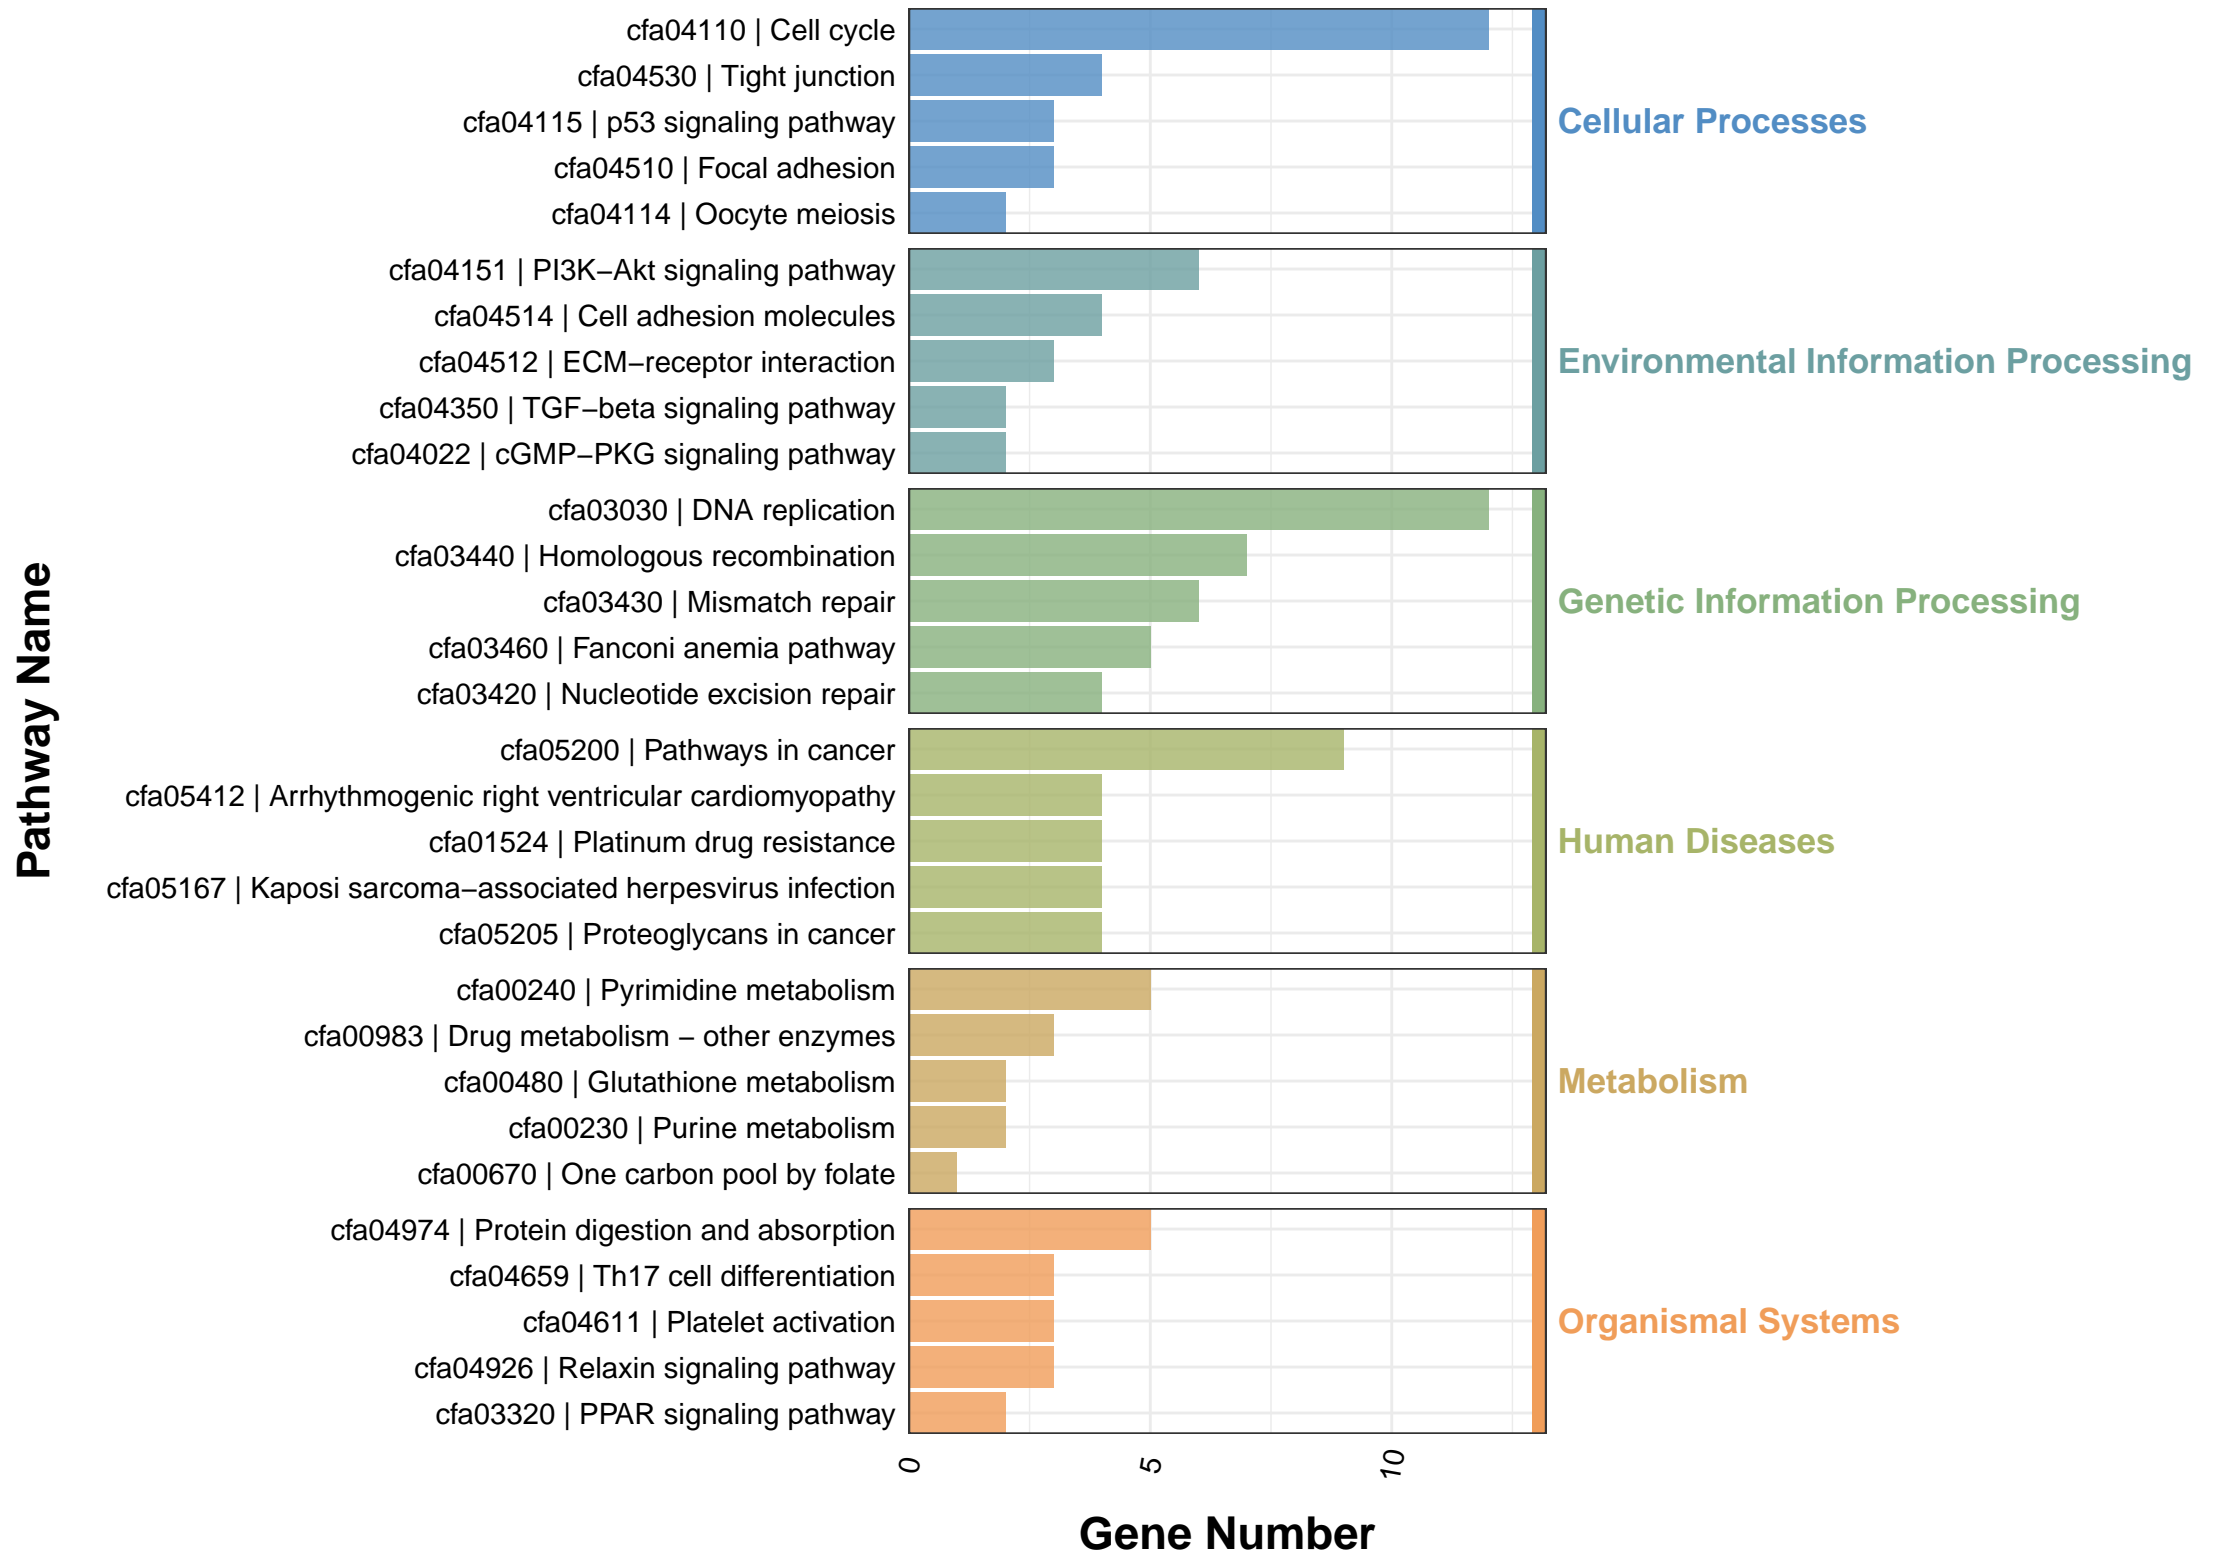

# KEGG Enrichment ScatterPlot

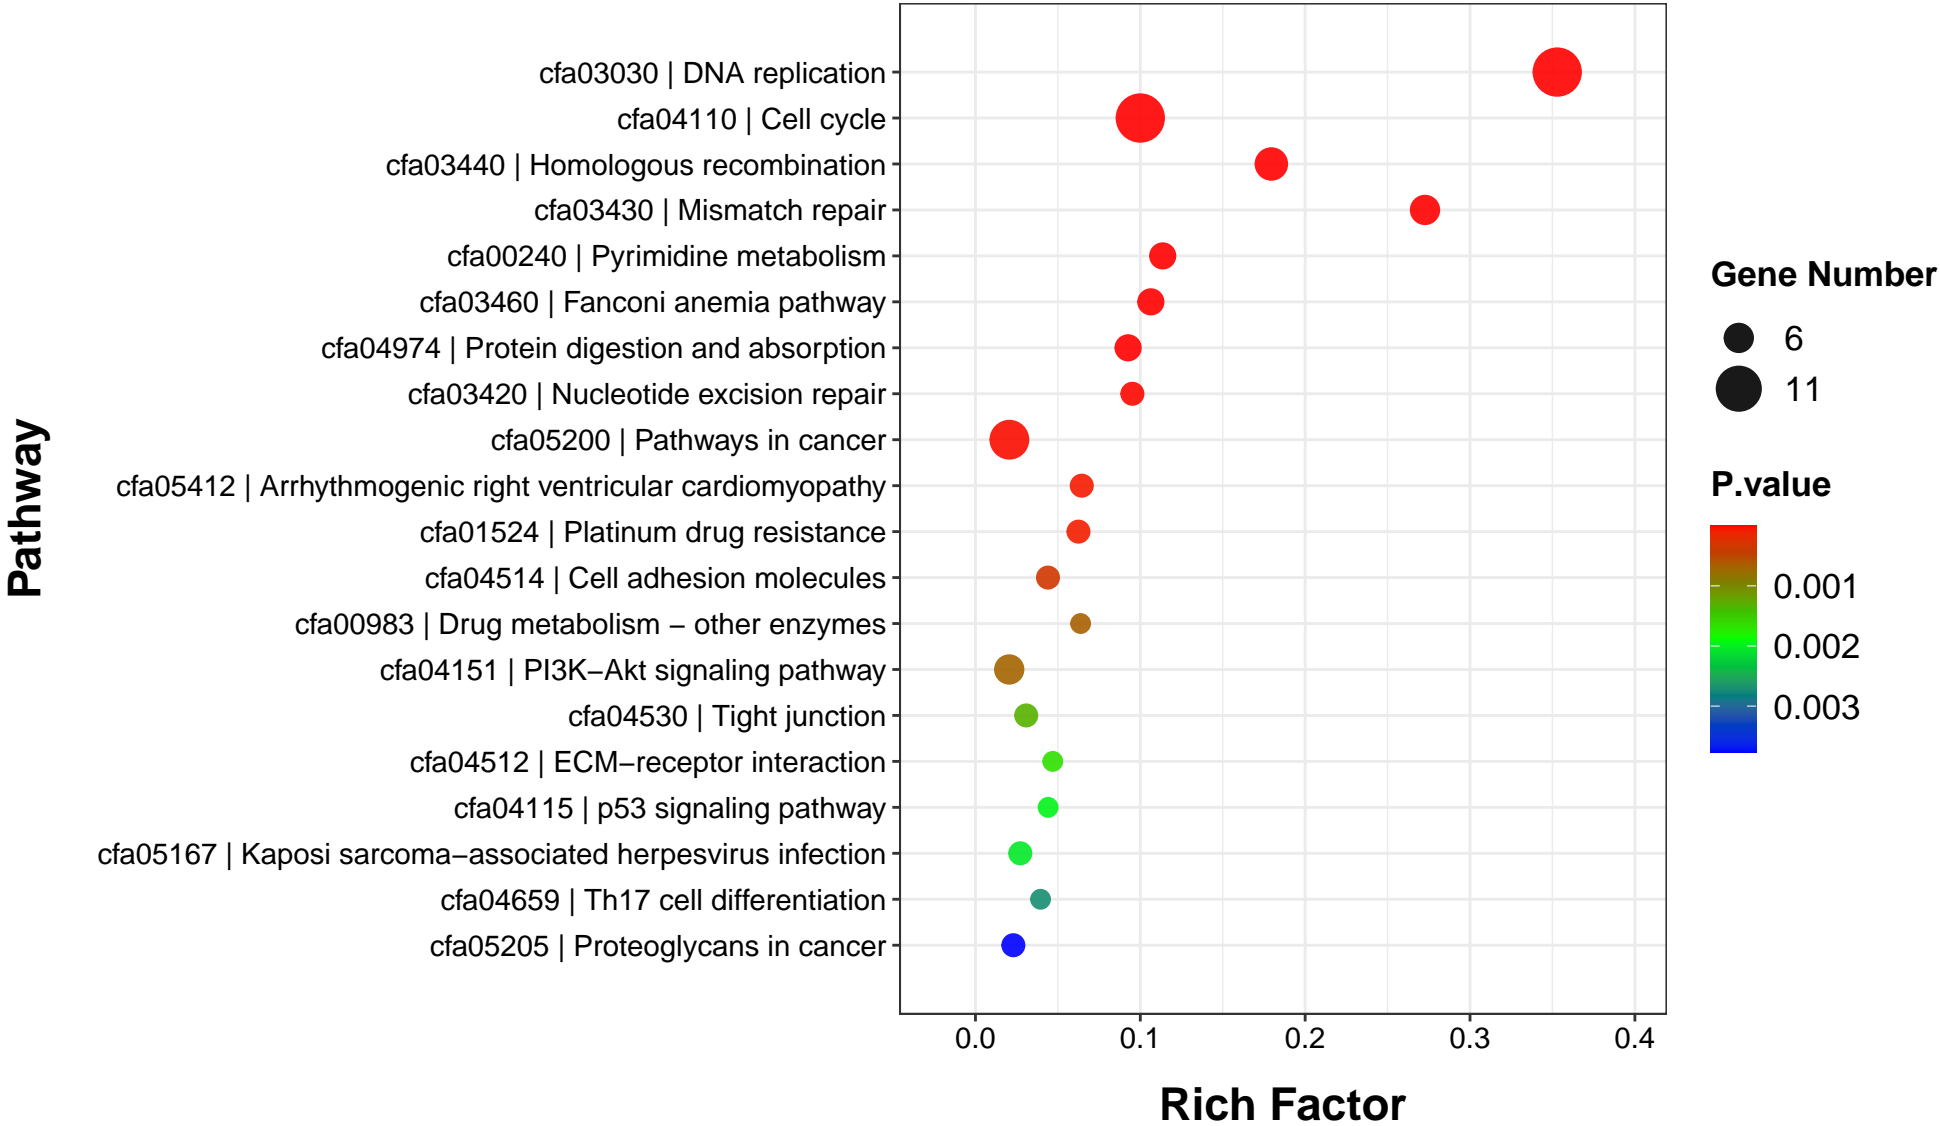



# GO Enrichment BarPlot

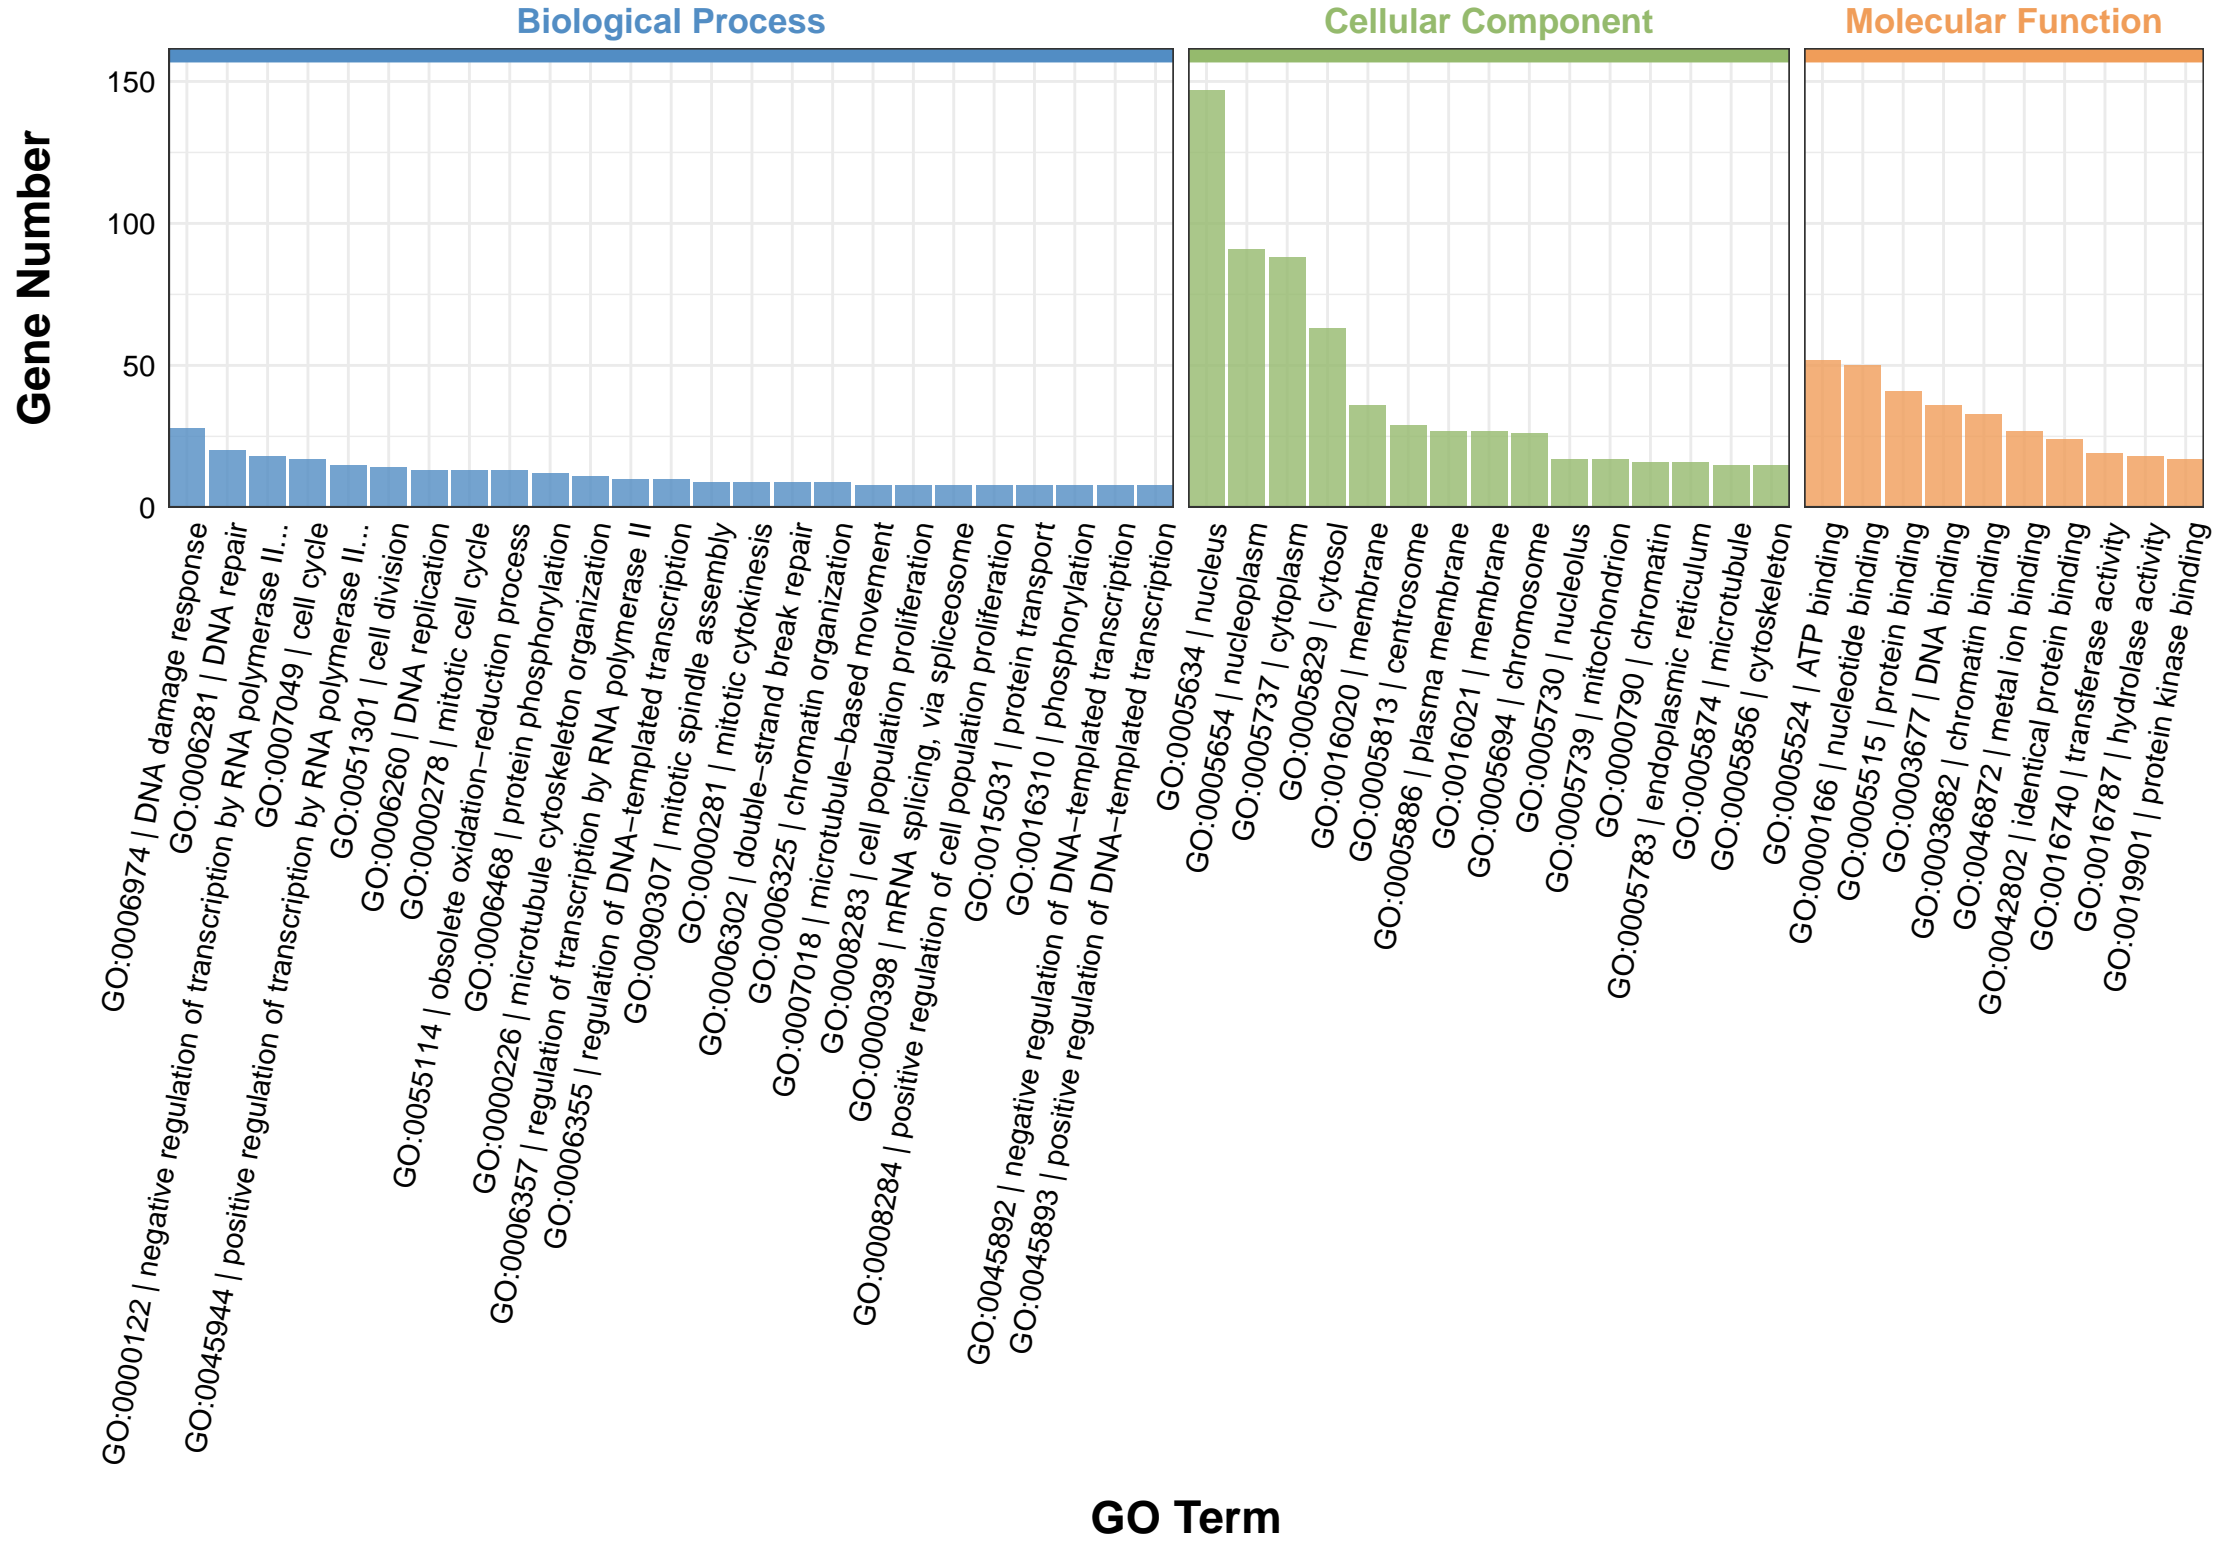

# GO Enrichment ScatterPlot

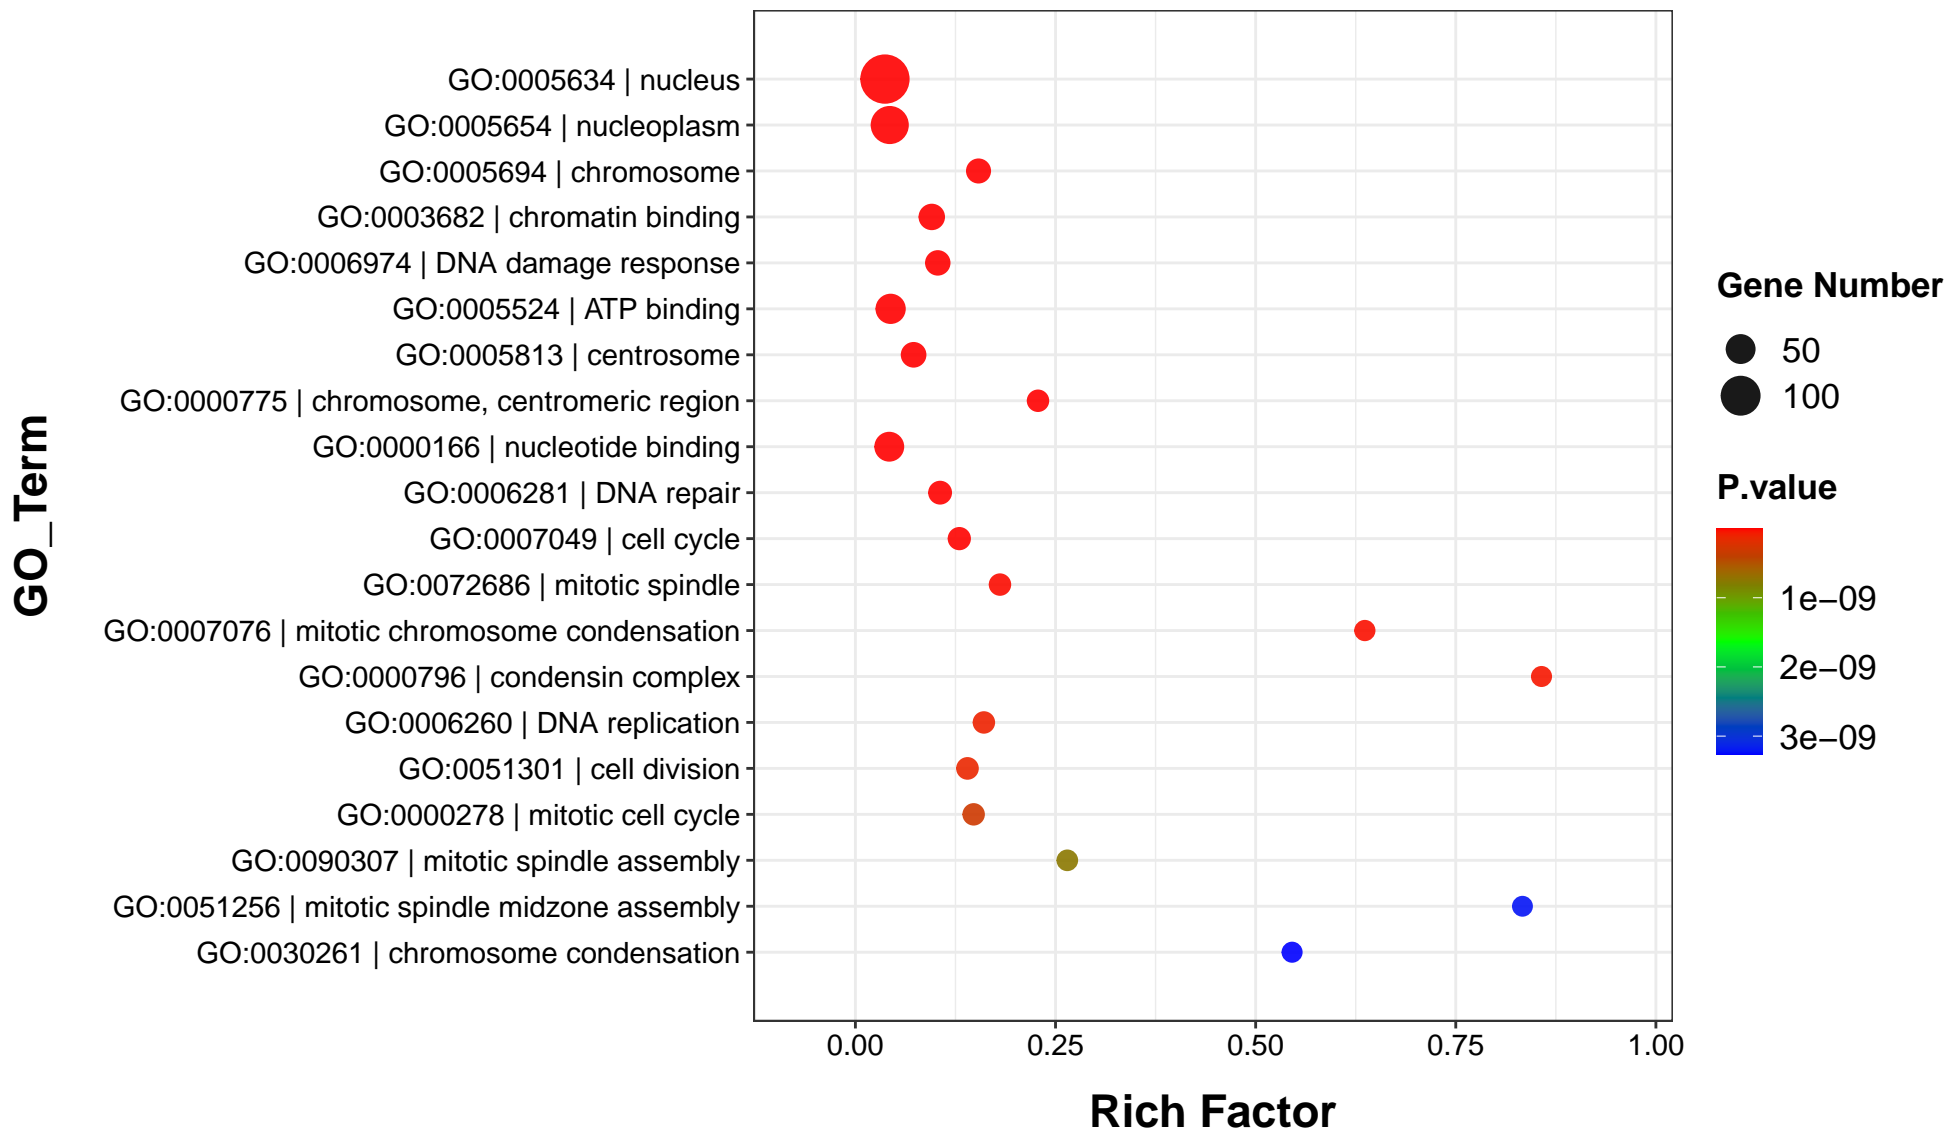

# KEGG Enrichment BarPlot

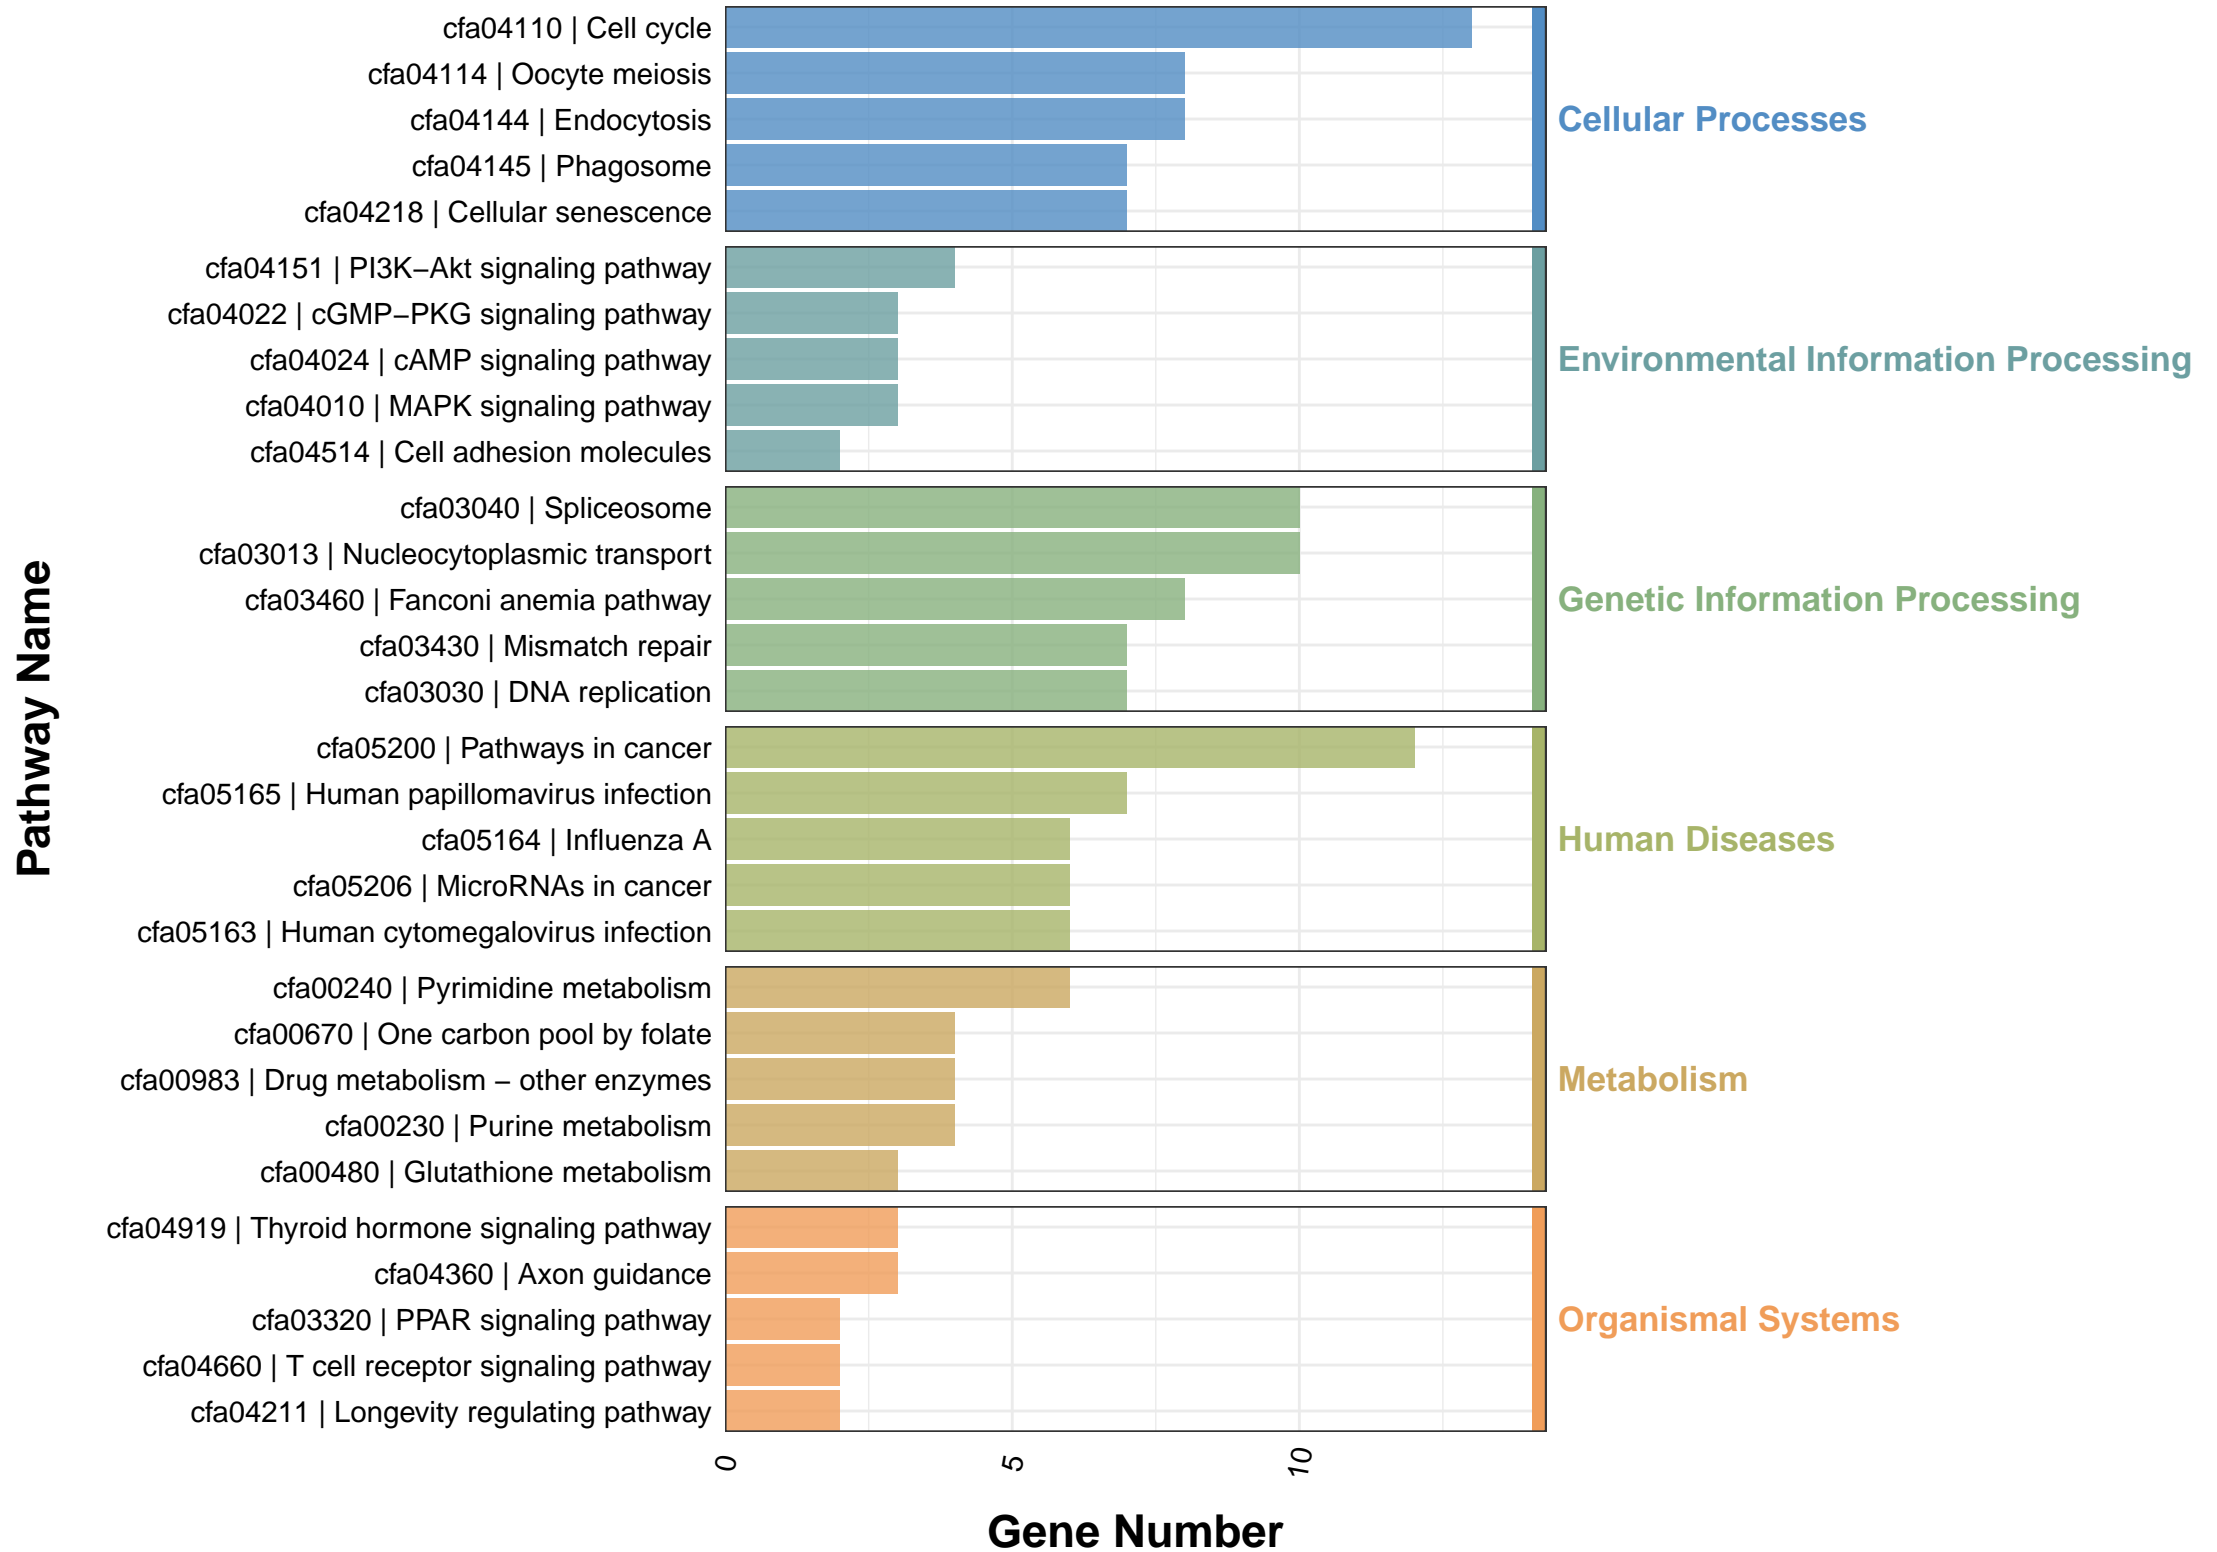

# KEGG Enrichment ScatterPlot

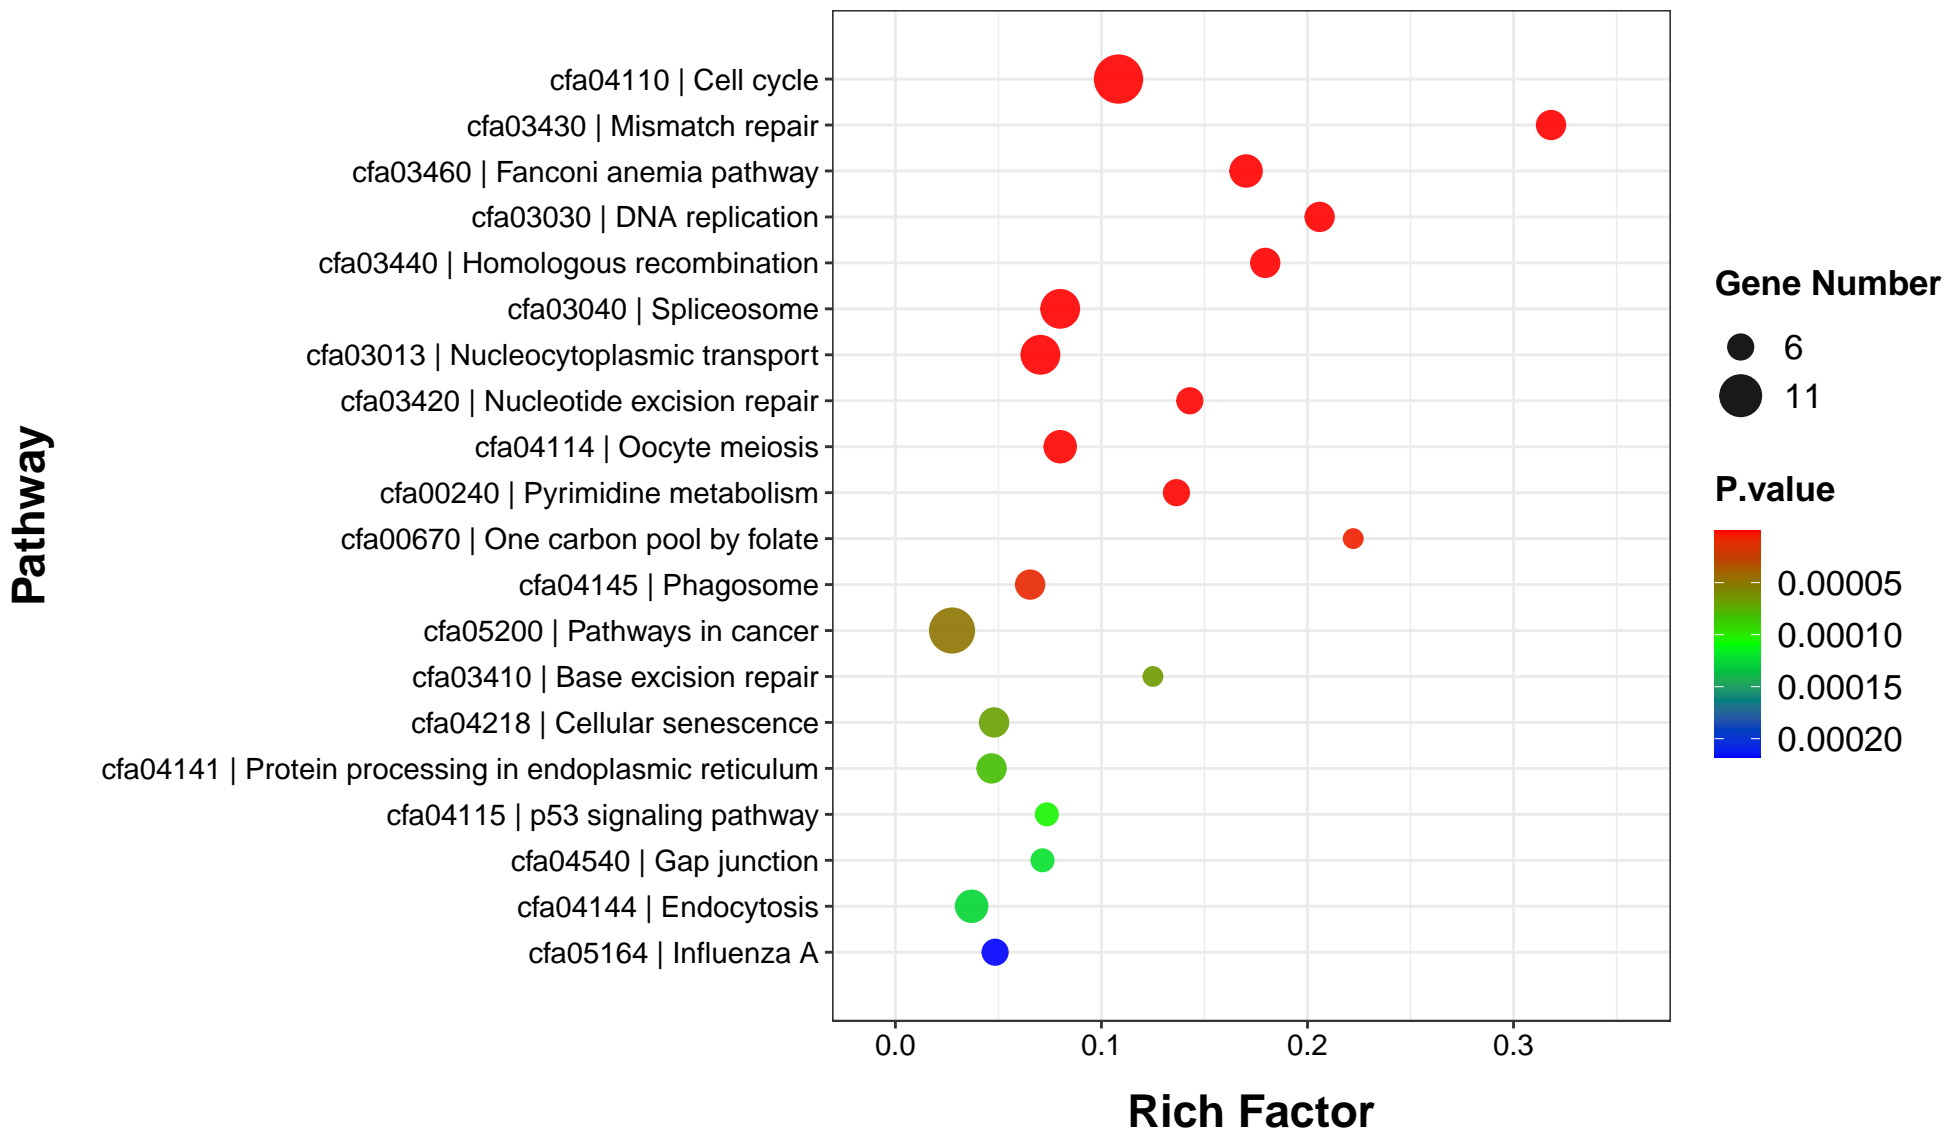

# GO Enrichment BarPlot

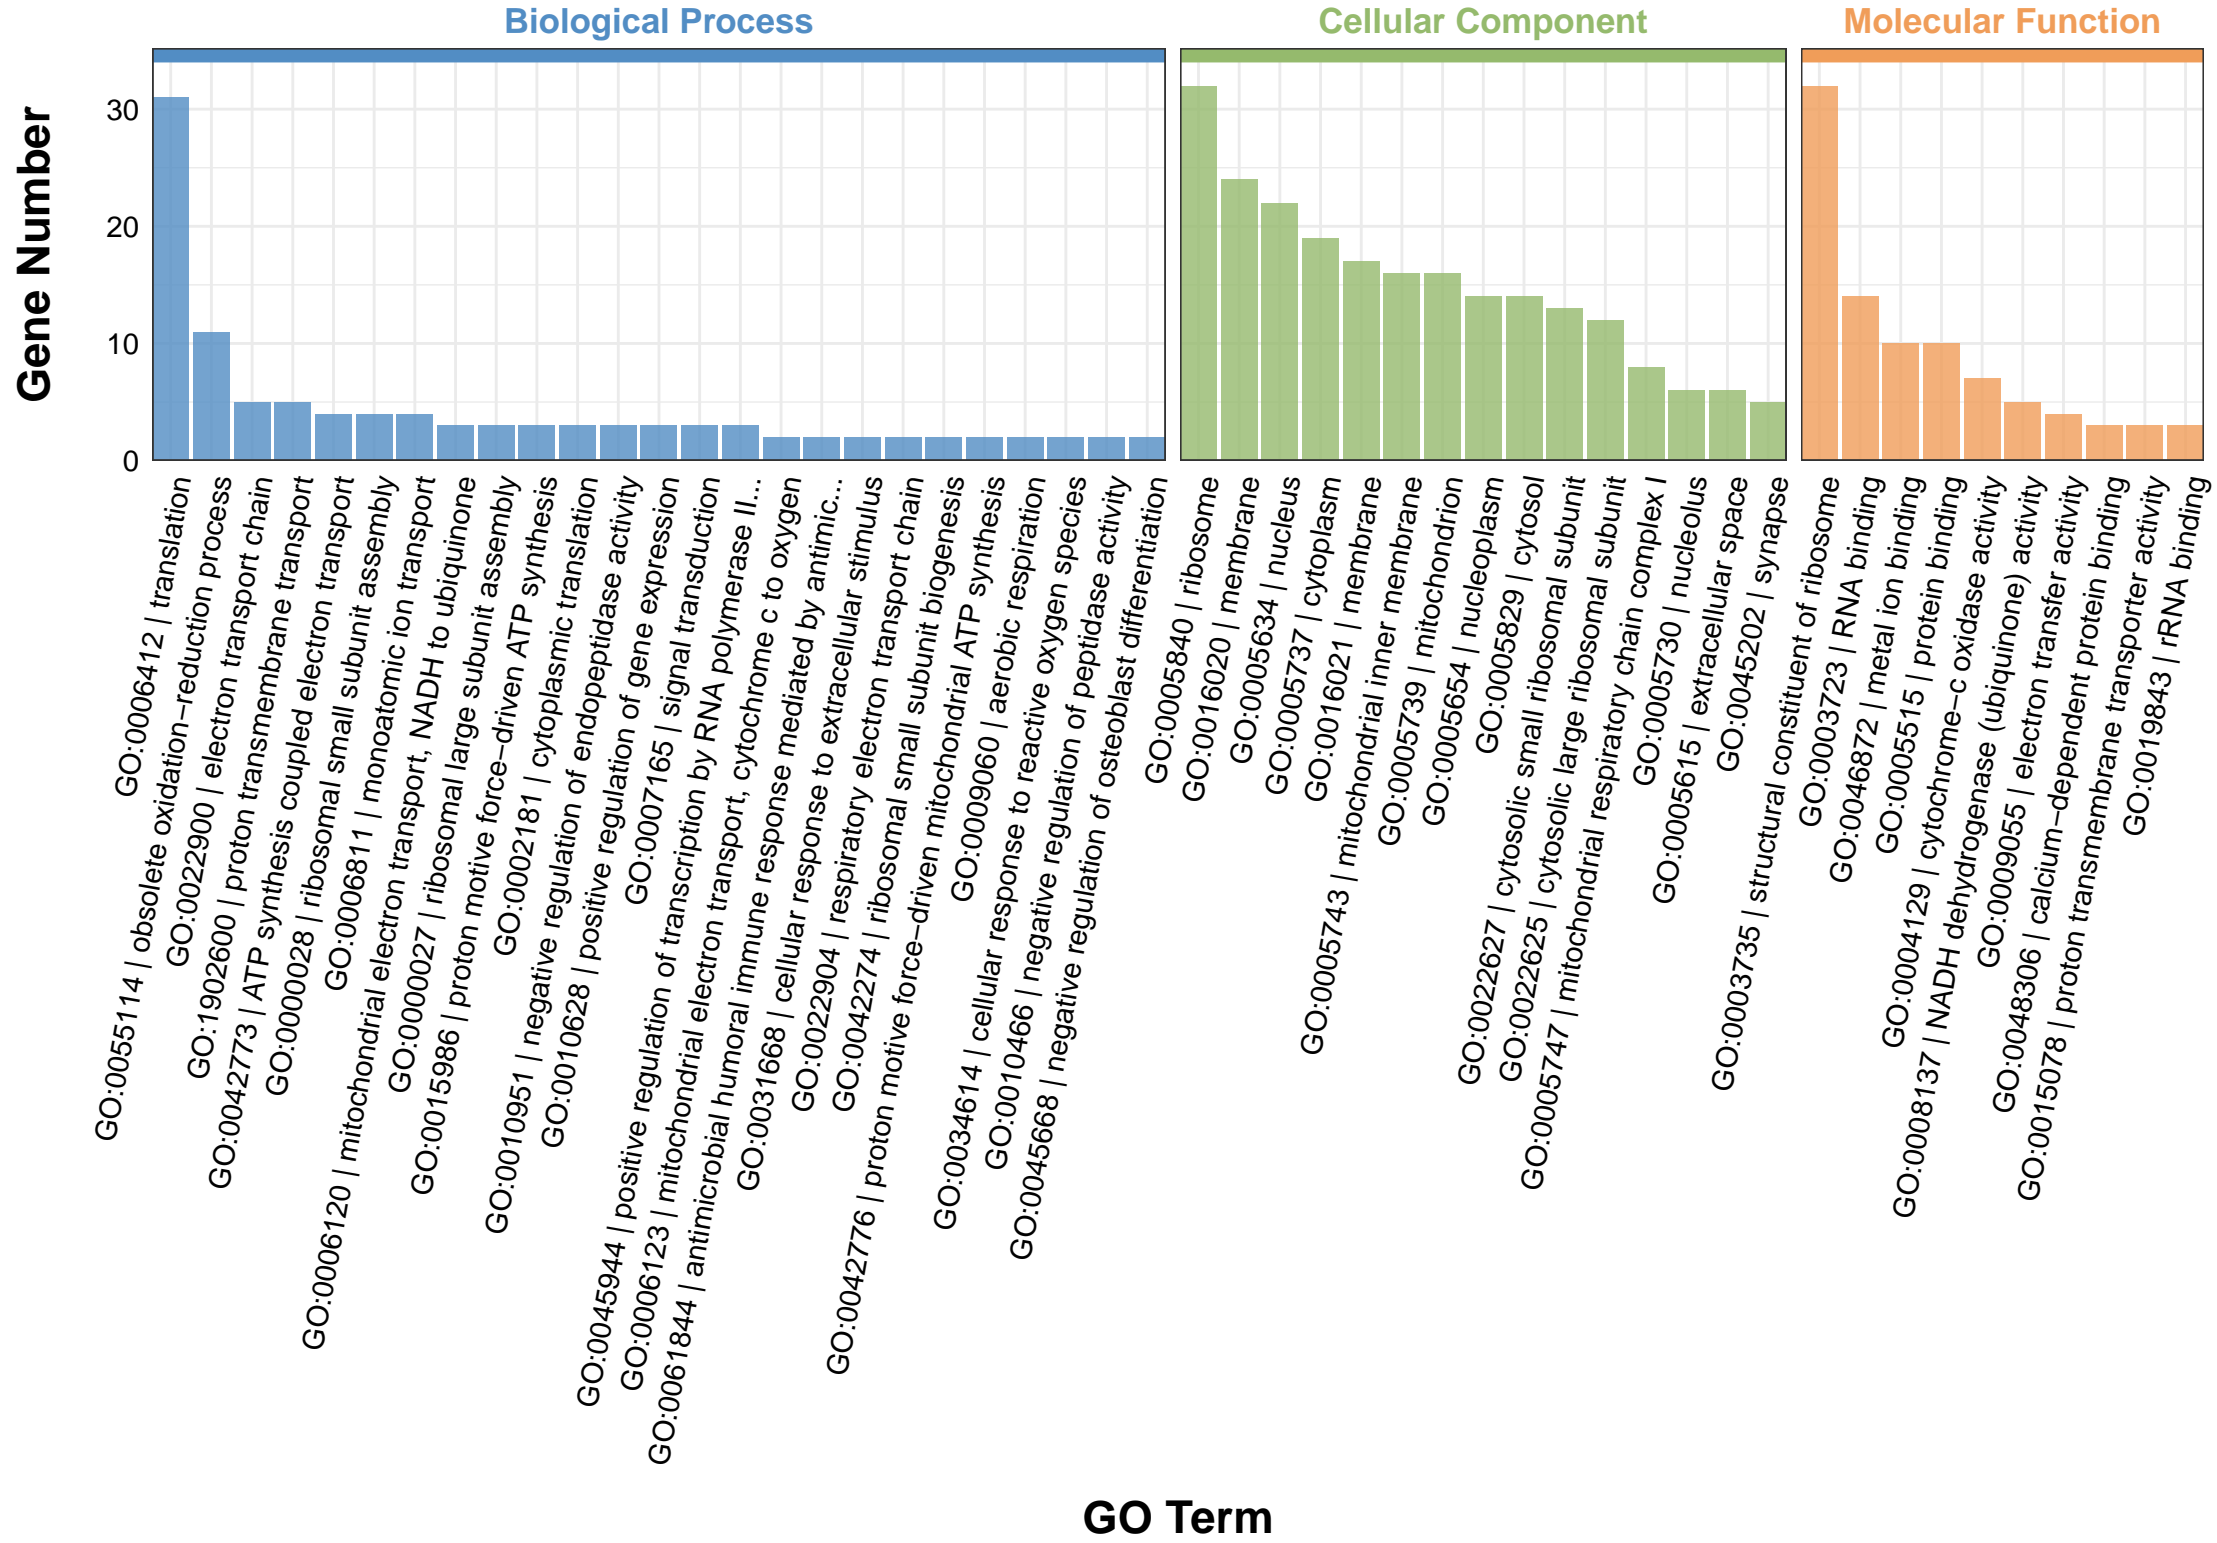

# GO Enrichment ScatterPlot

GO\_Term

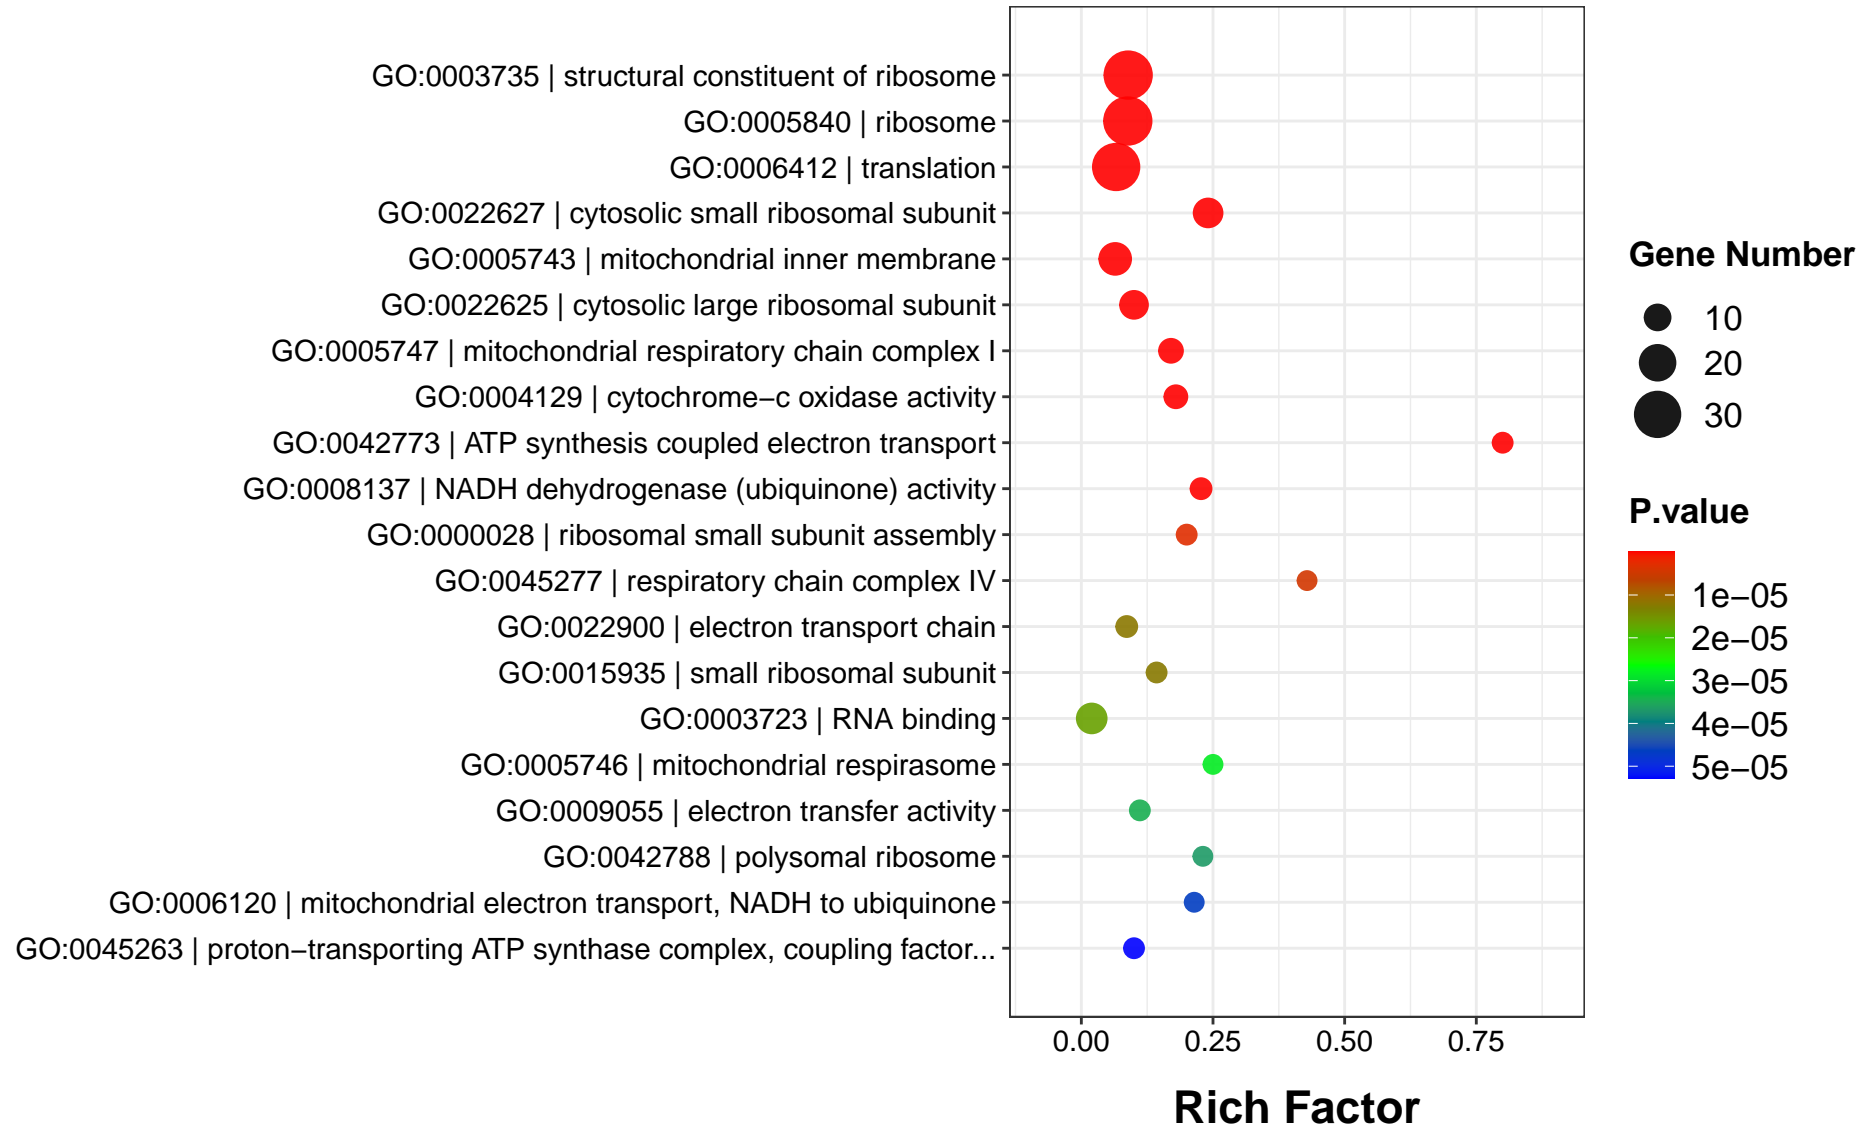

# KEGG Enrichment BarPlot

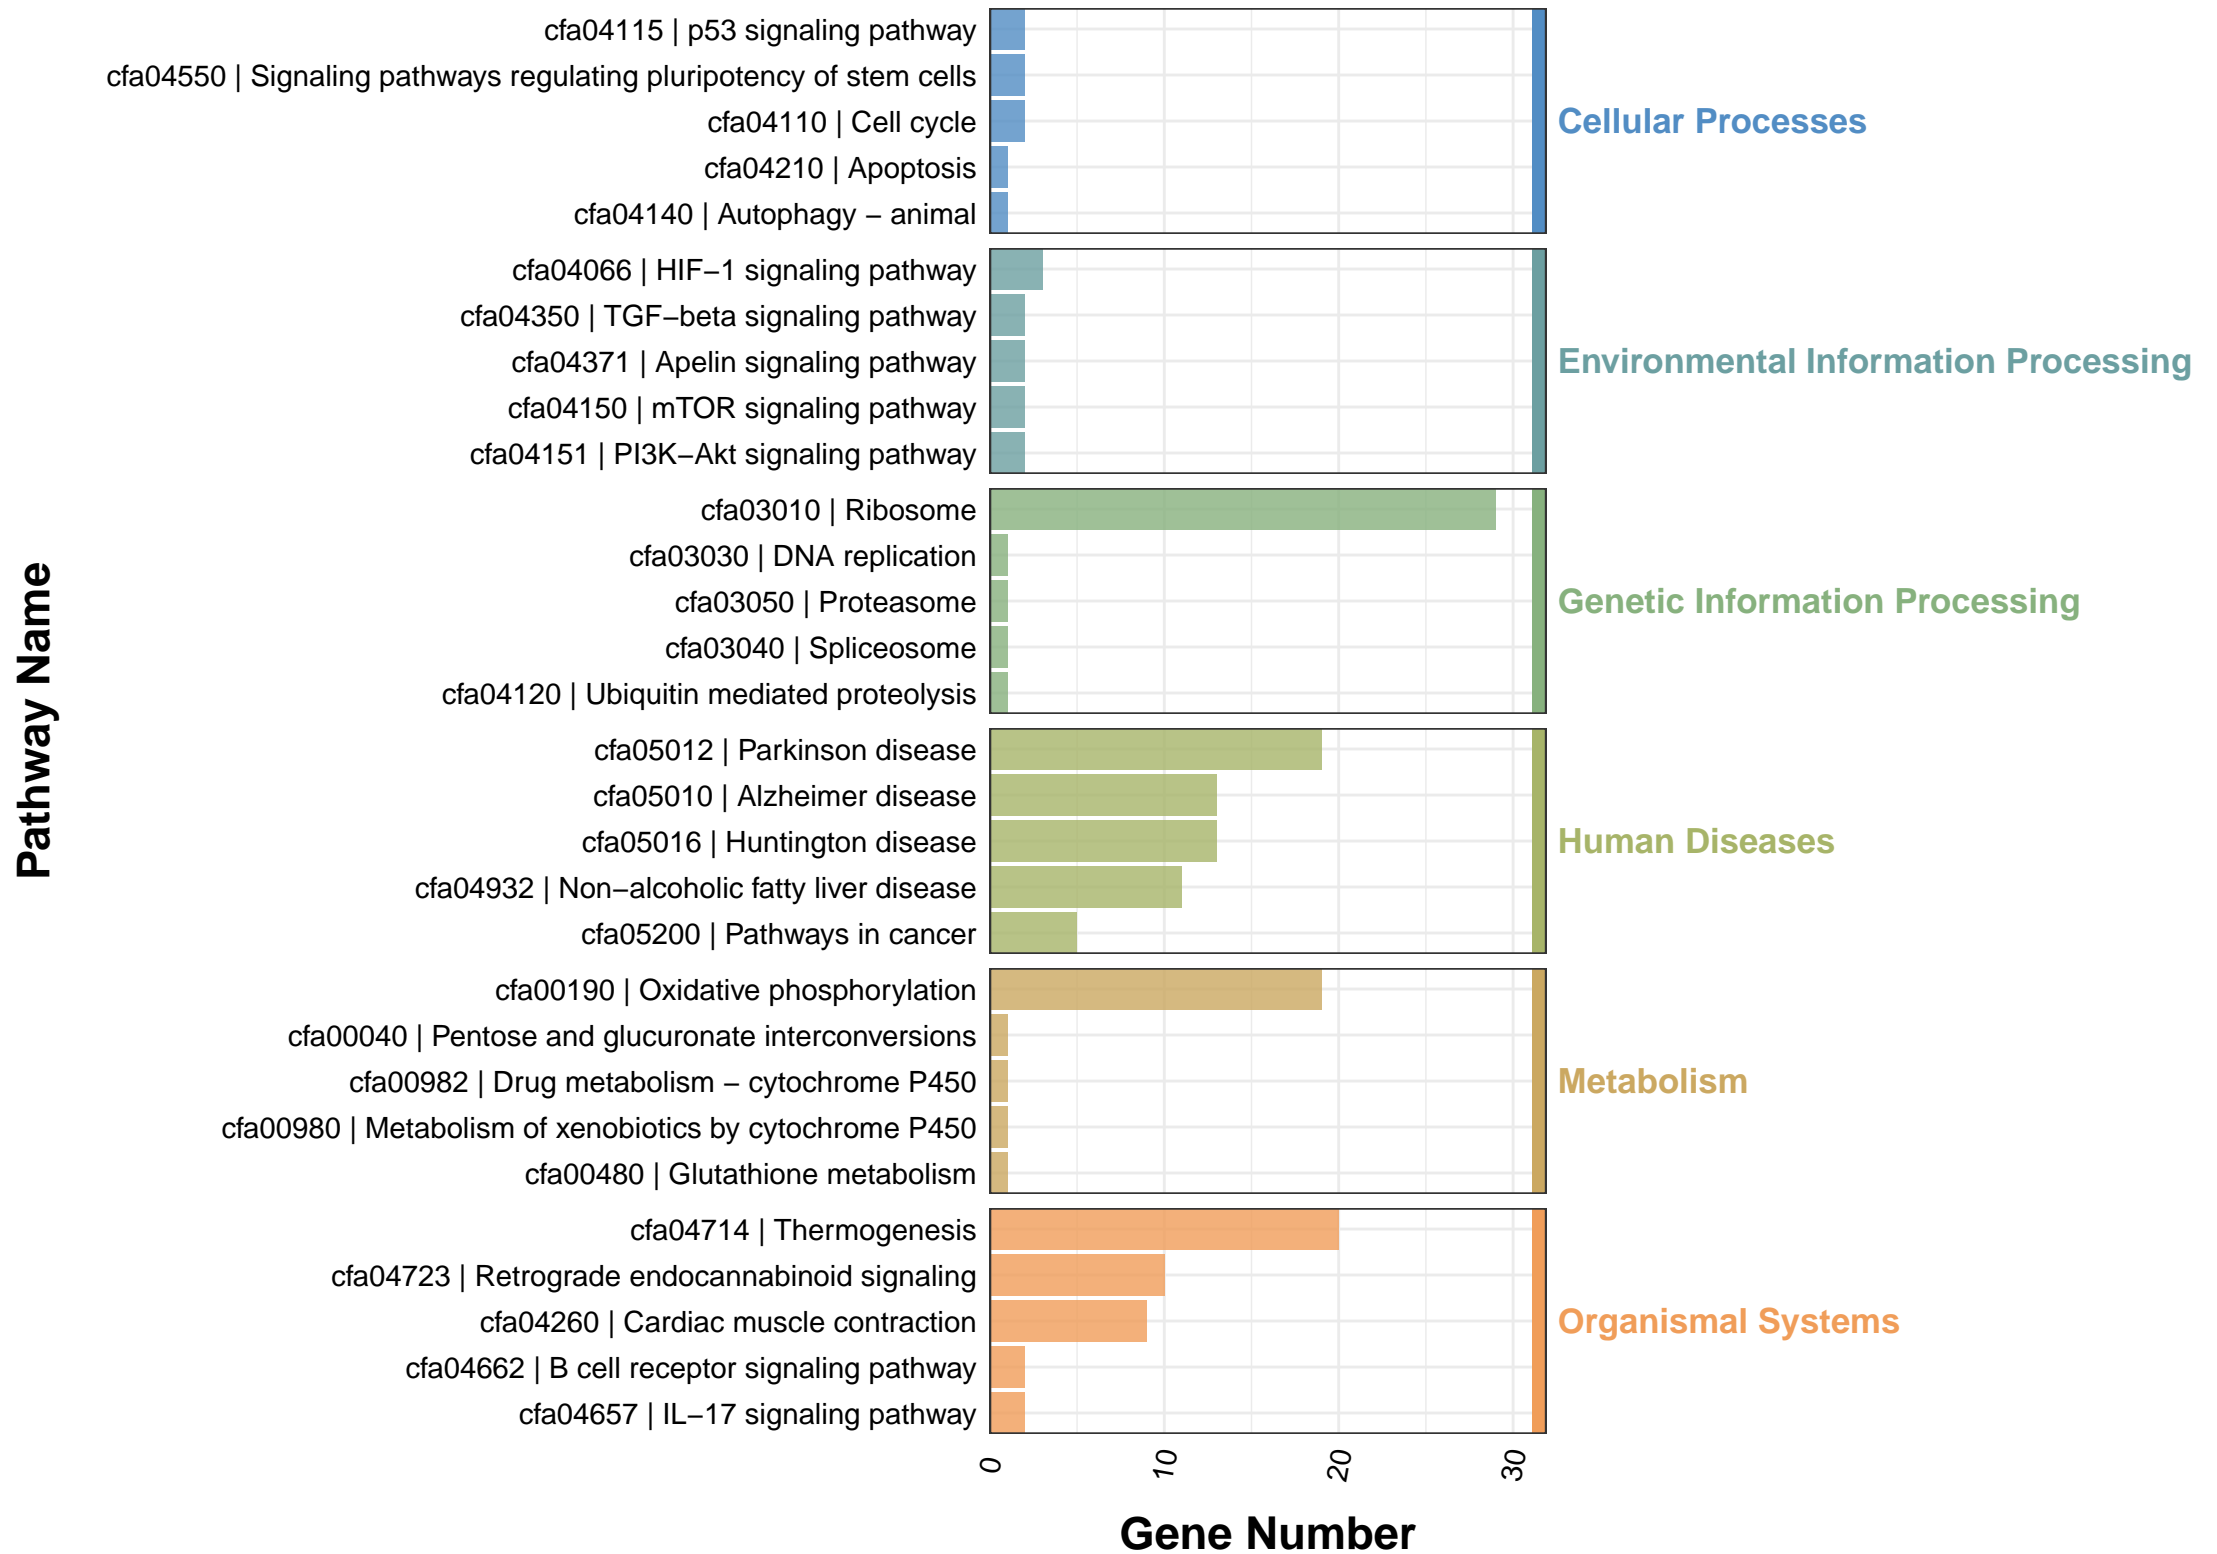

# KEGG Enrichment ScatterPlot

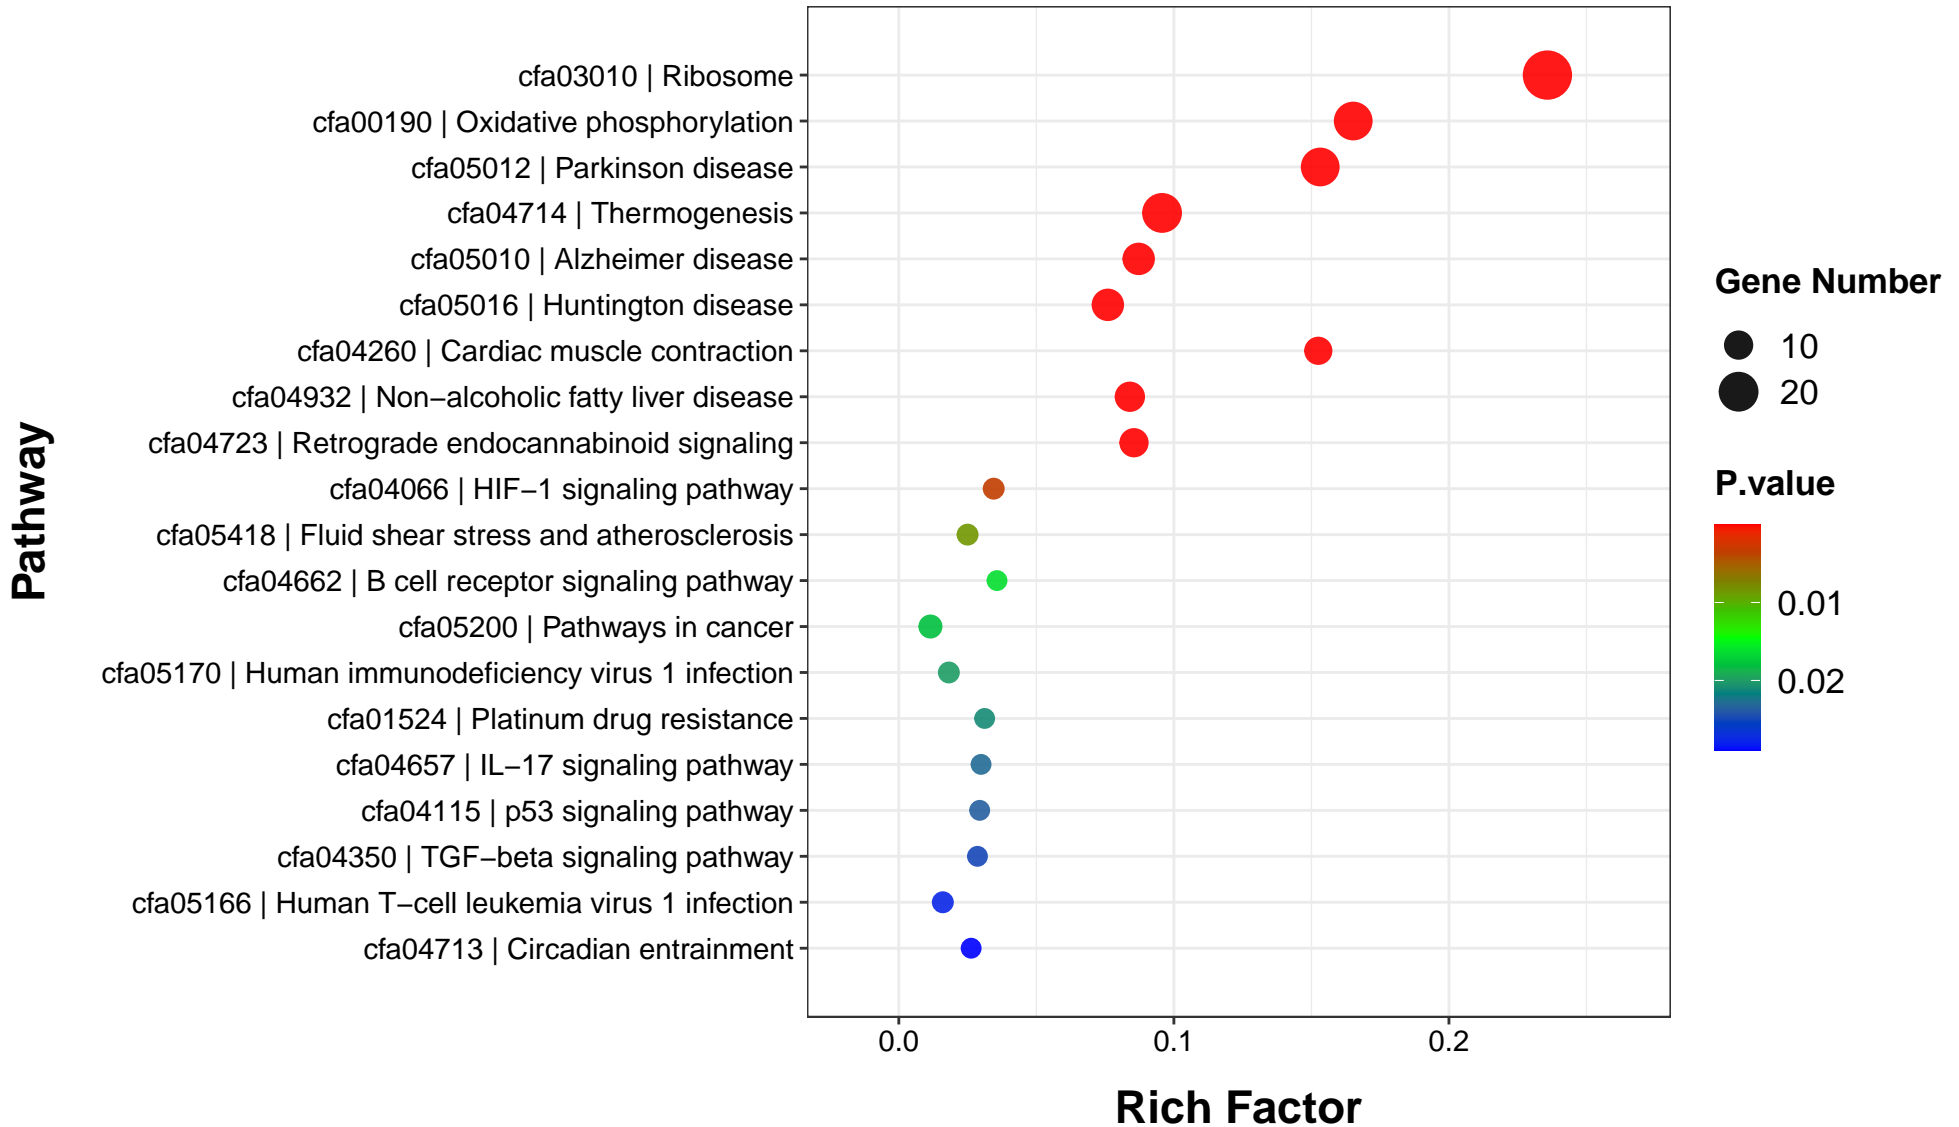



# GO Enrichment BarPlot

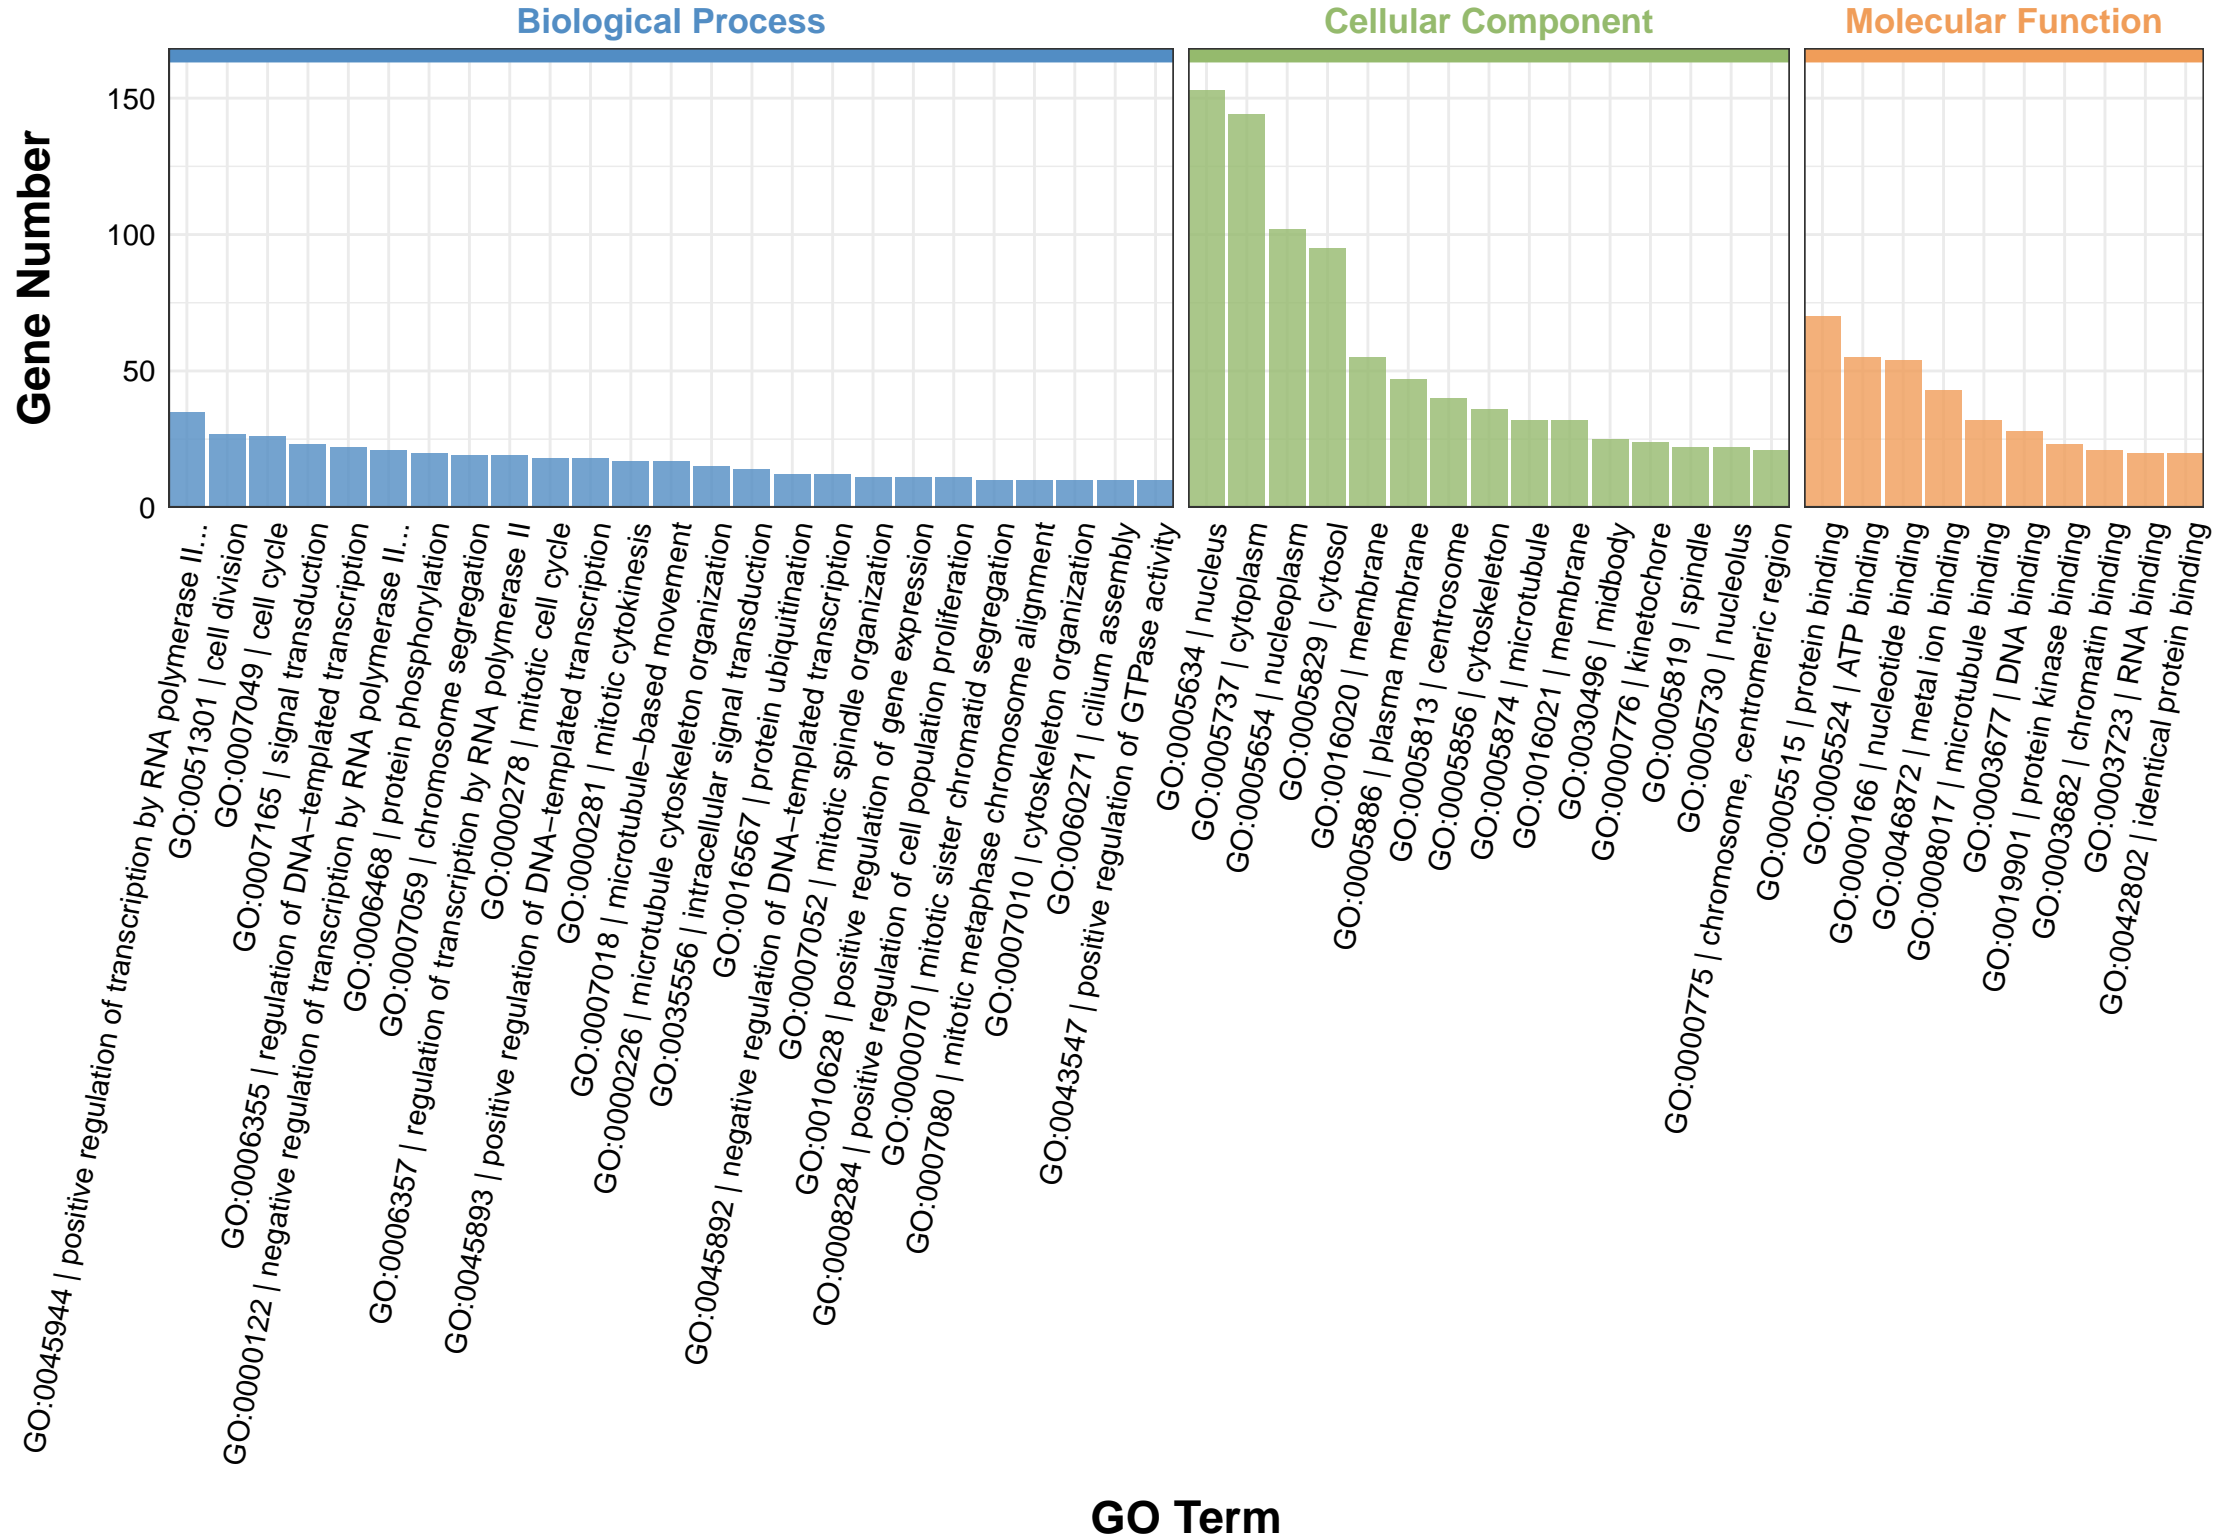

# GO Enrichment ScatterPlot

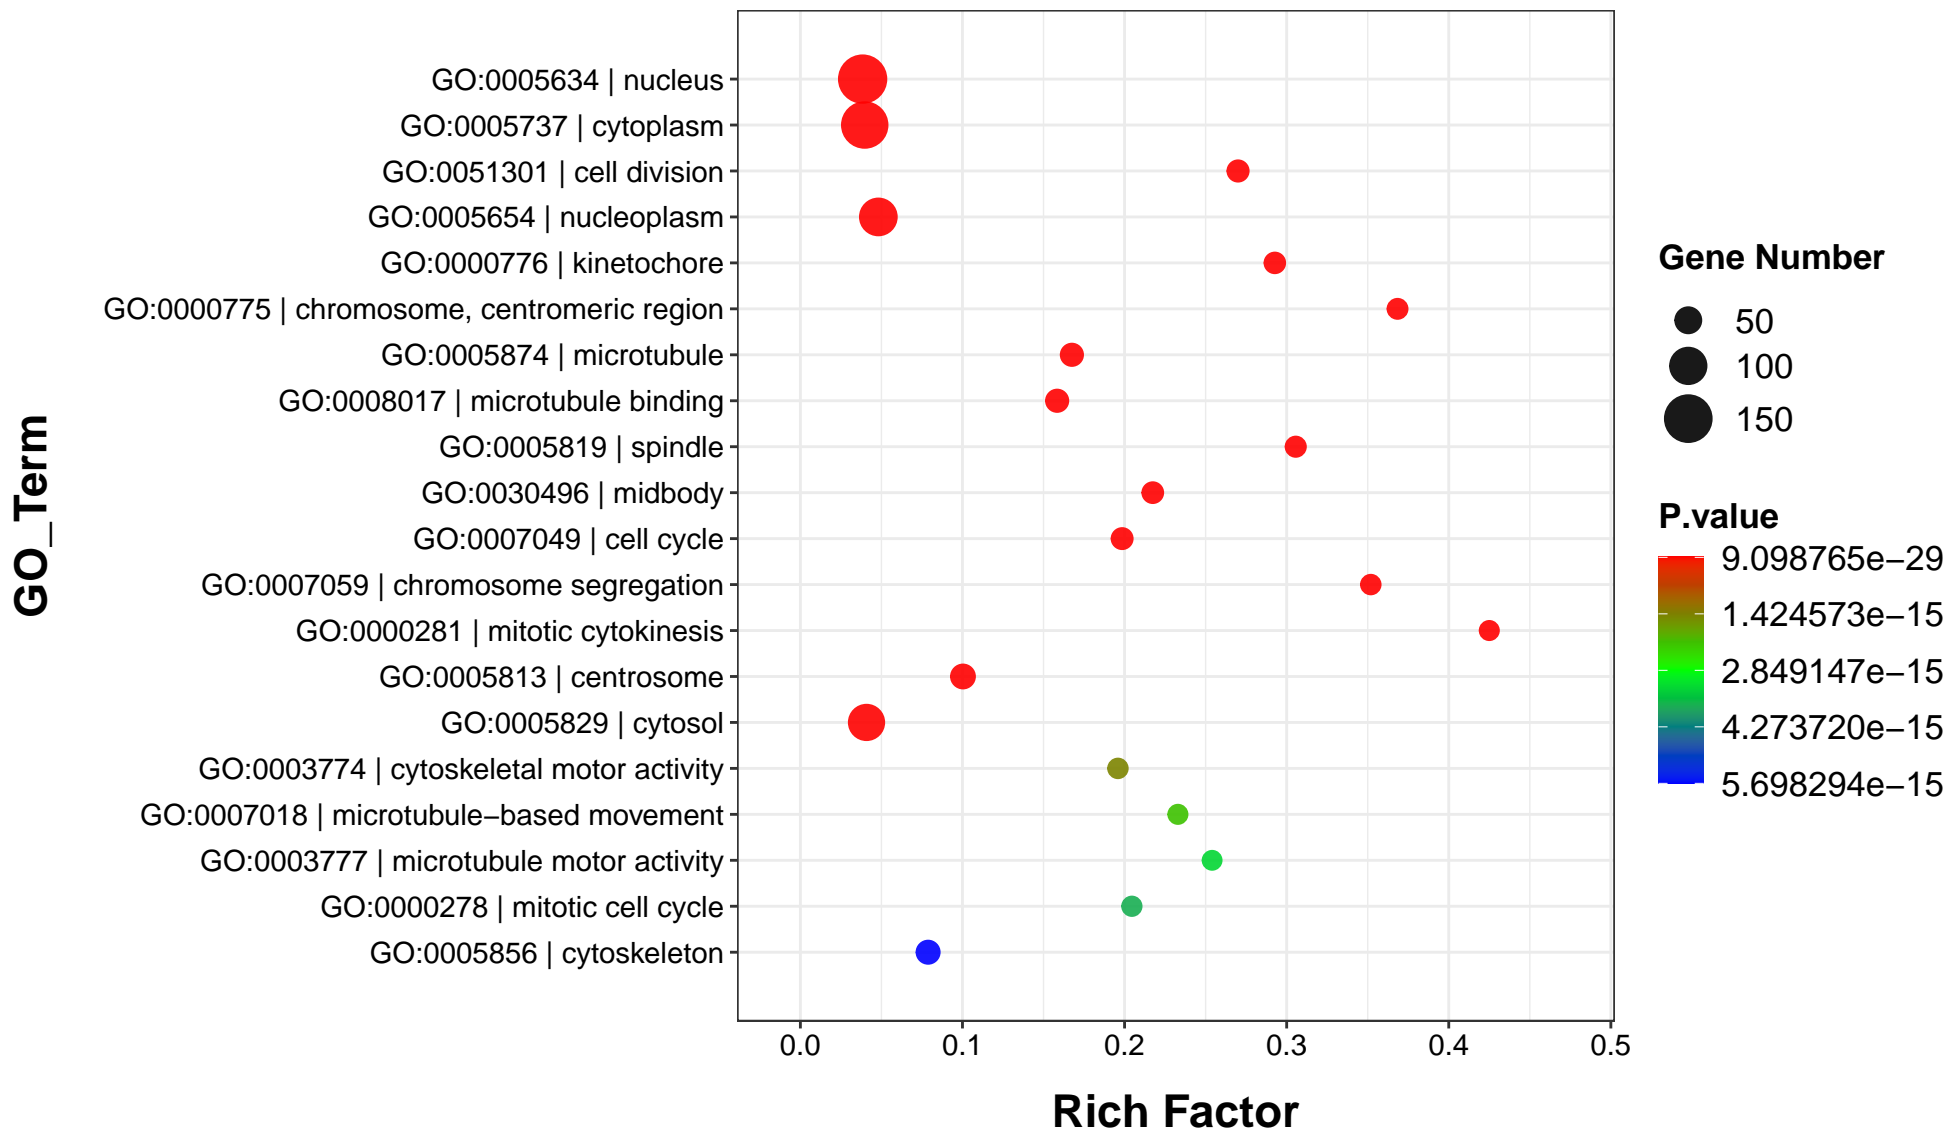

# KEGG Enrichment BarPlot

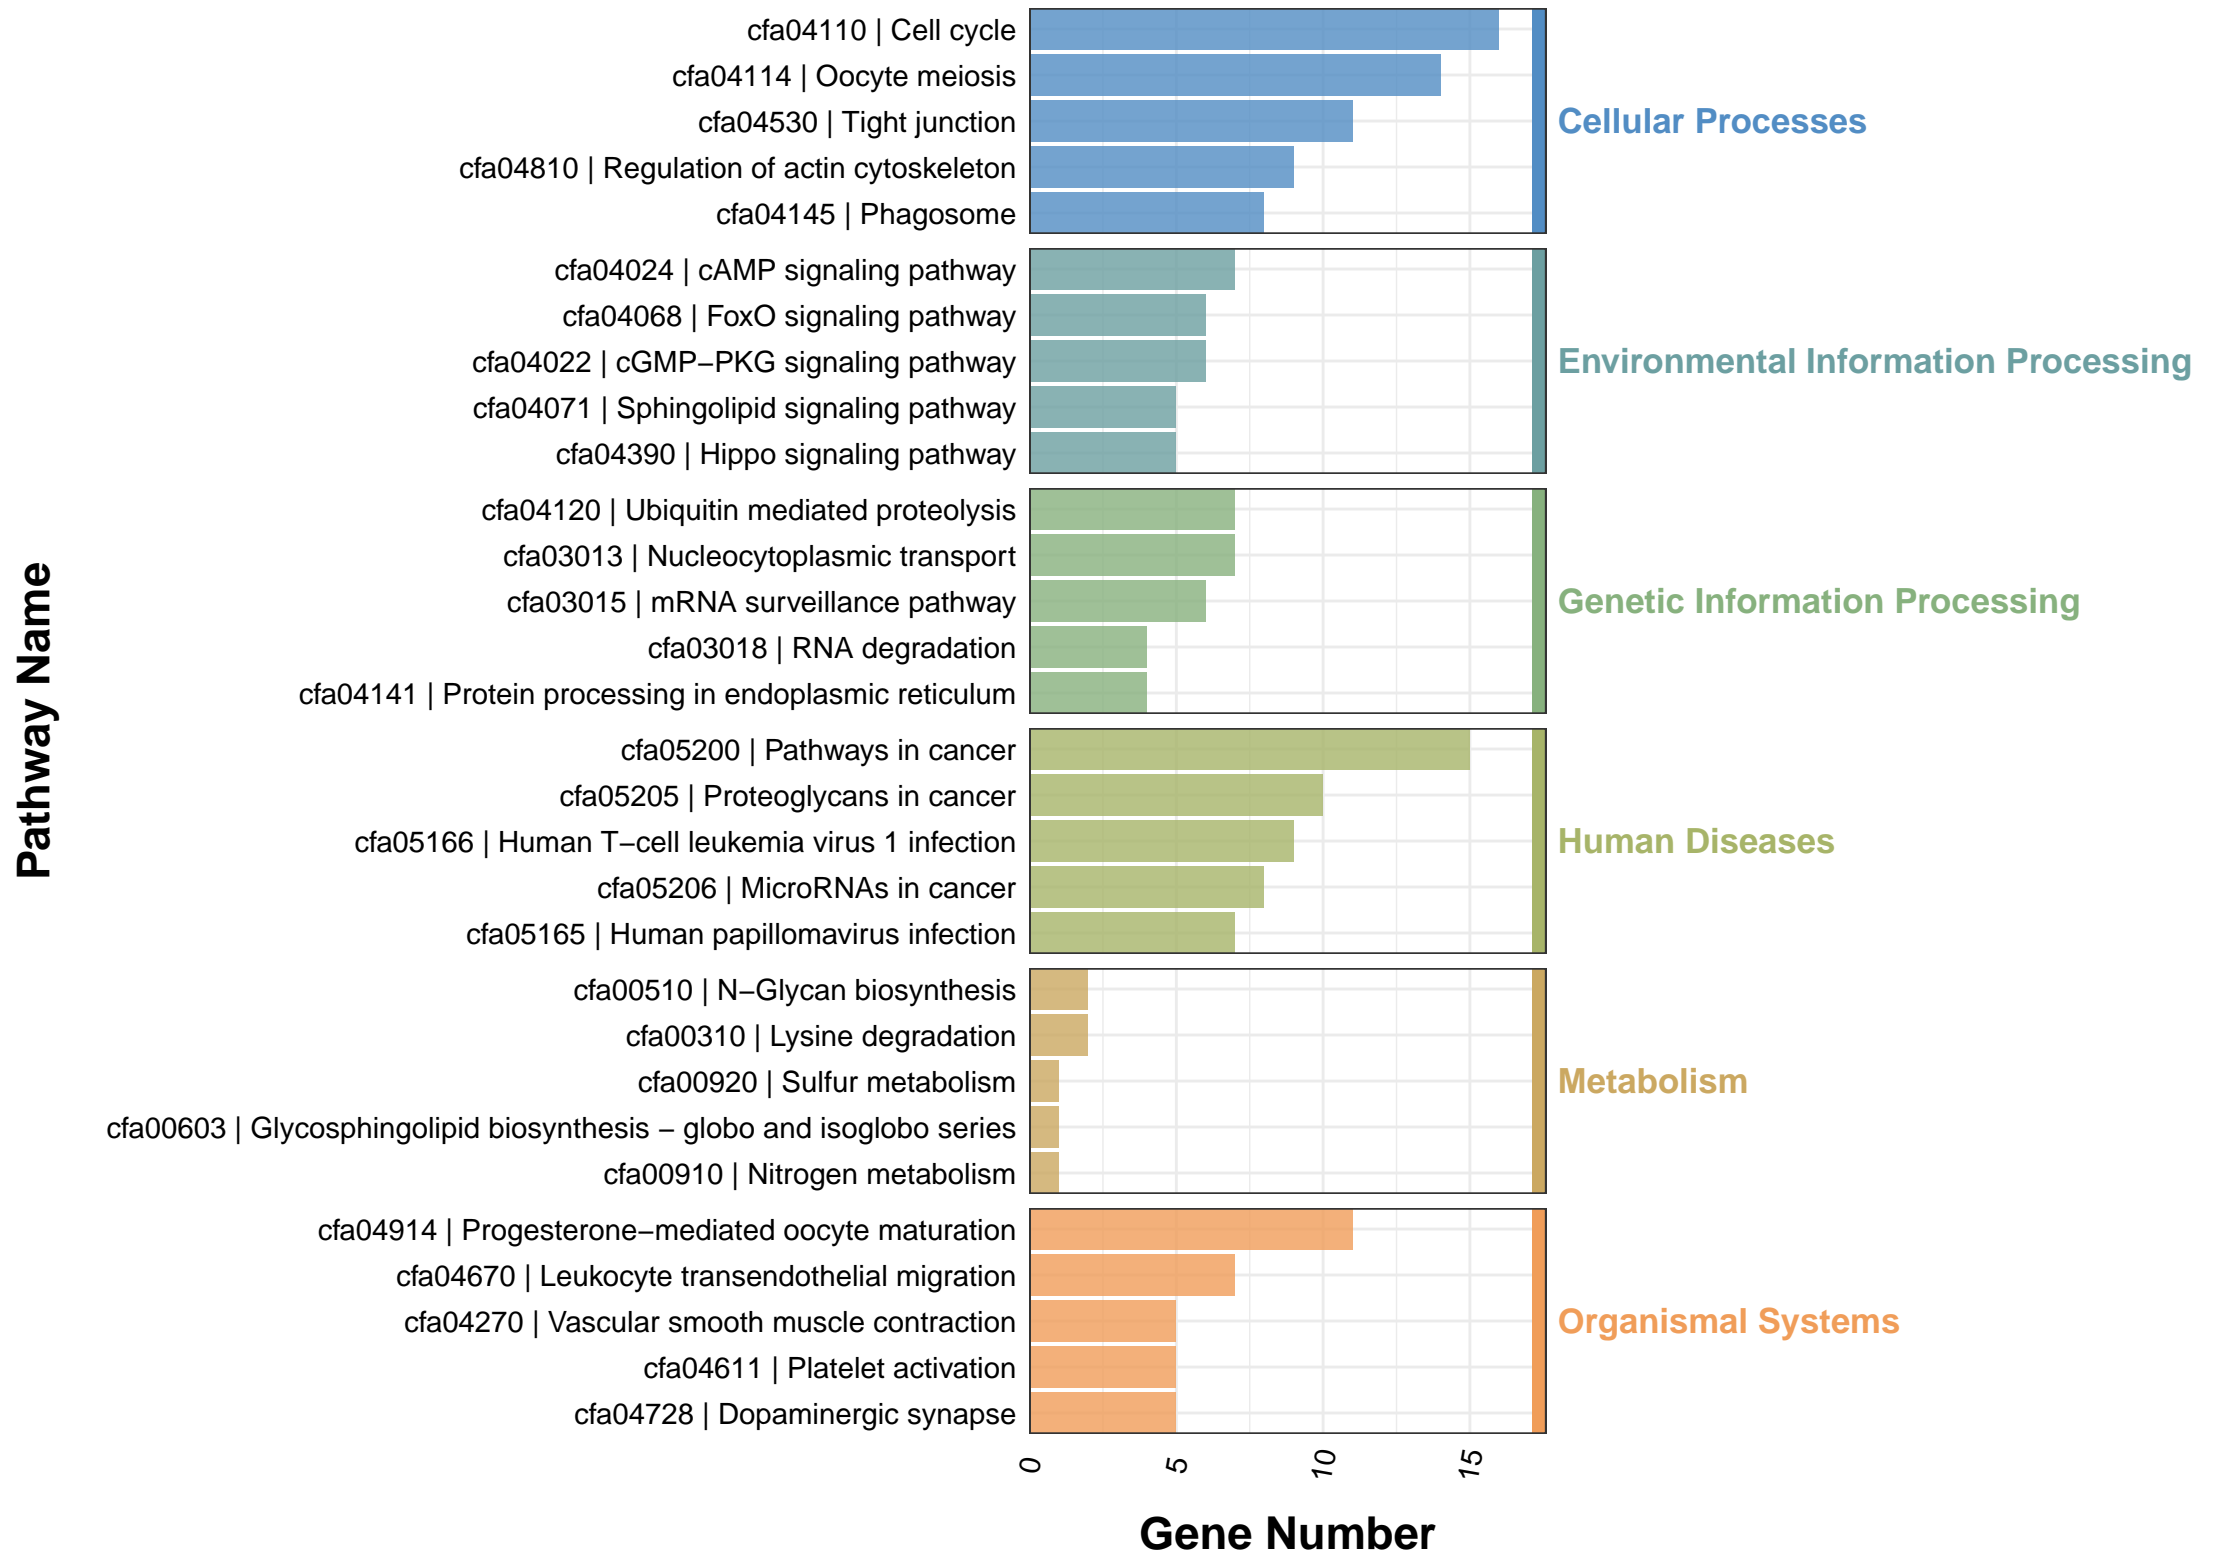

# KEGG Enrichment ScatterPlot

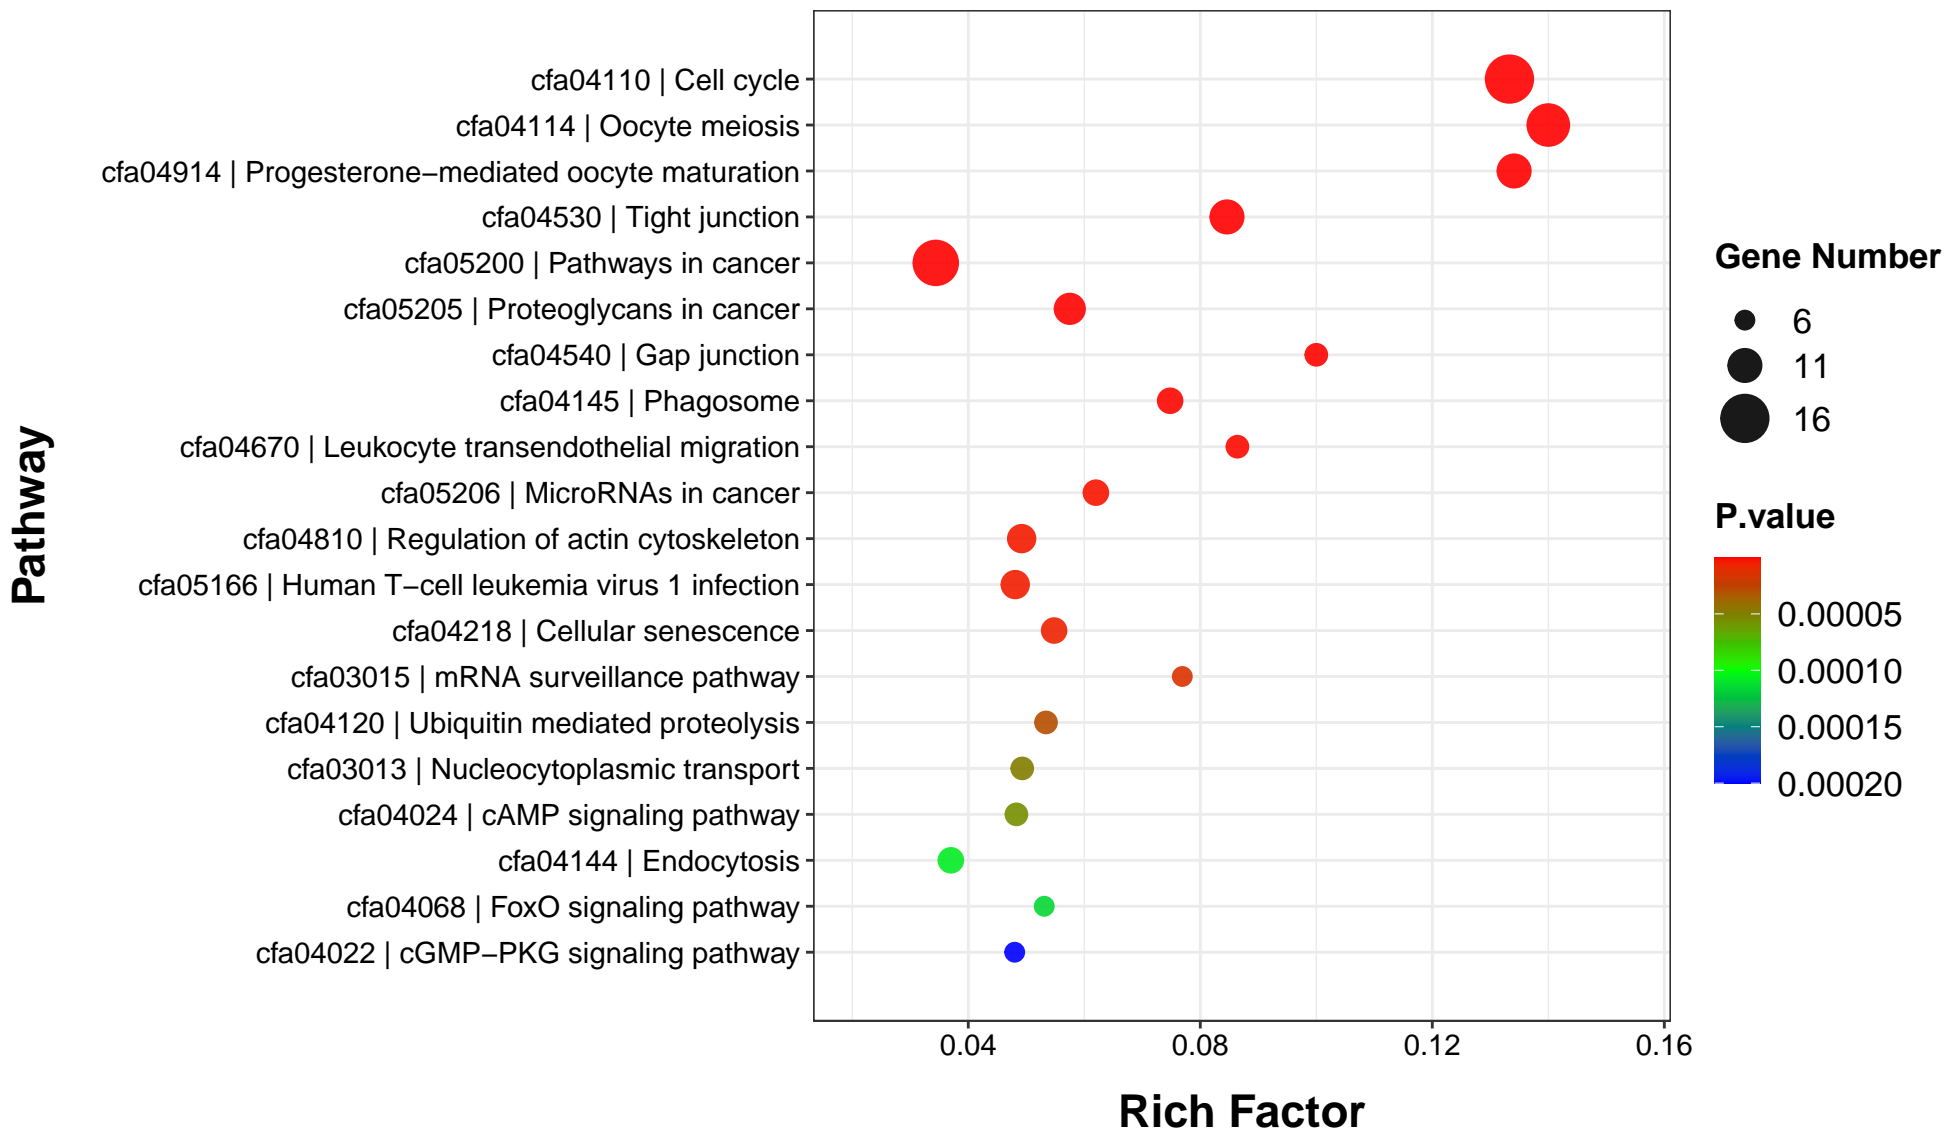

# GO Enrichment BarPlot

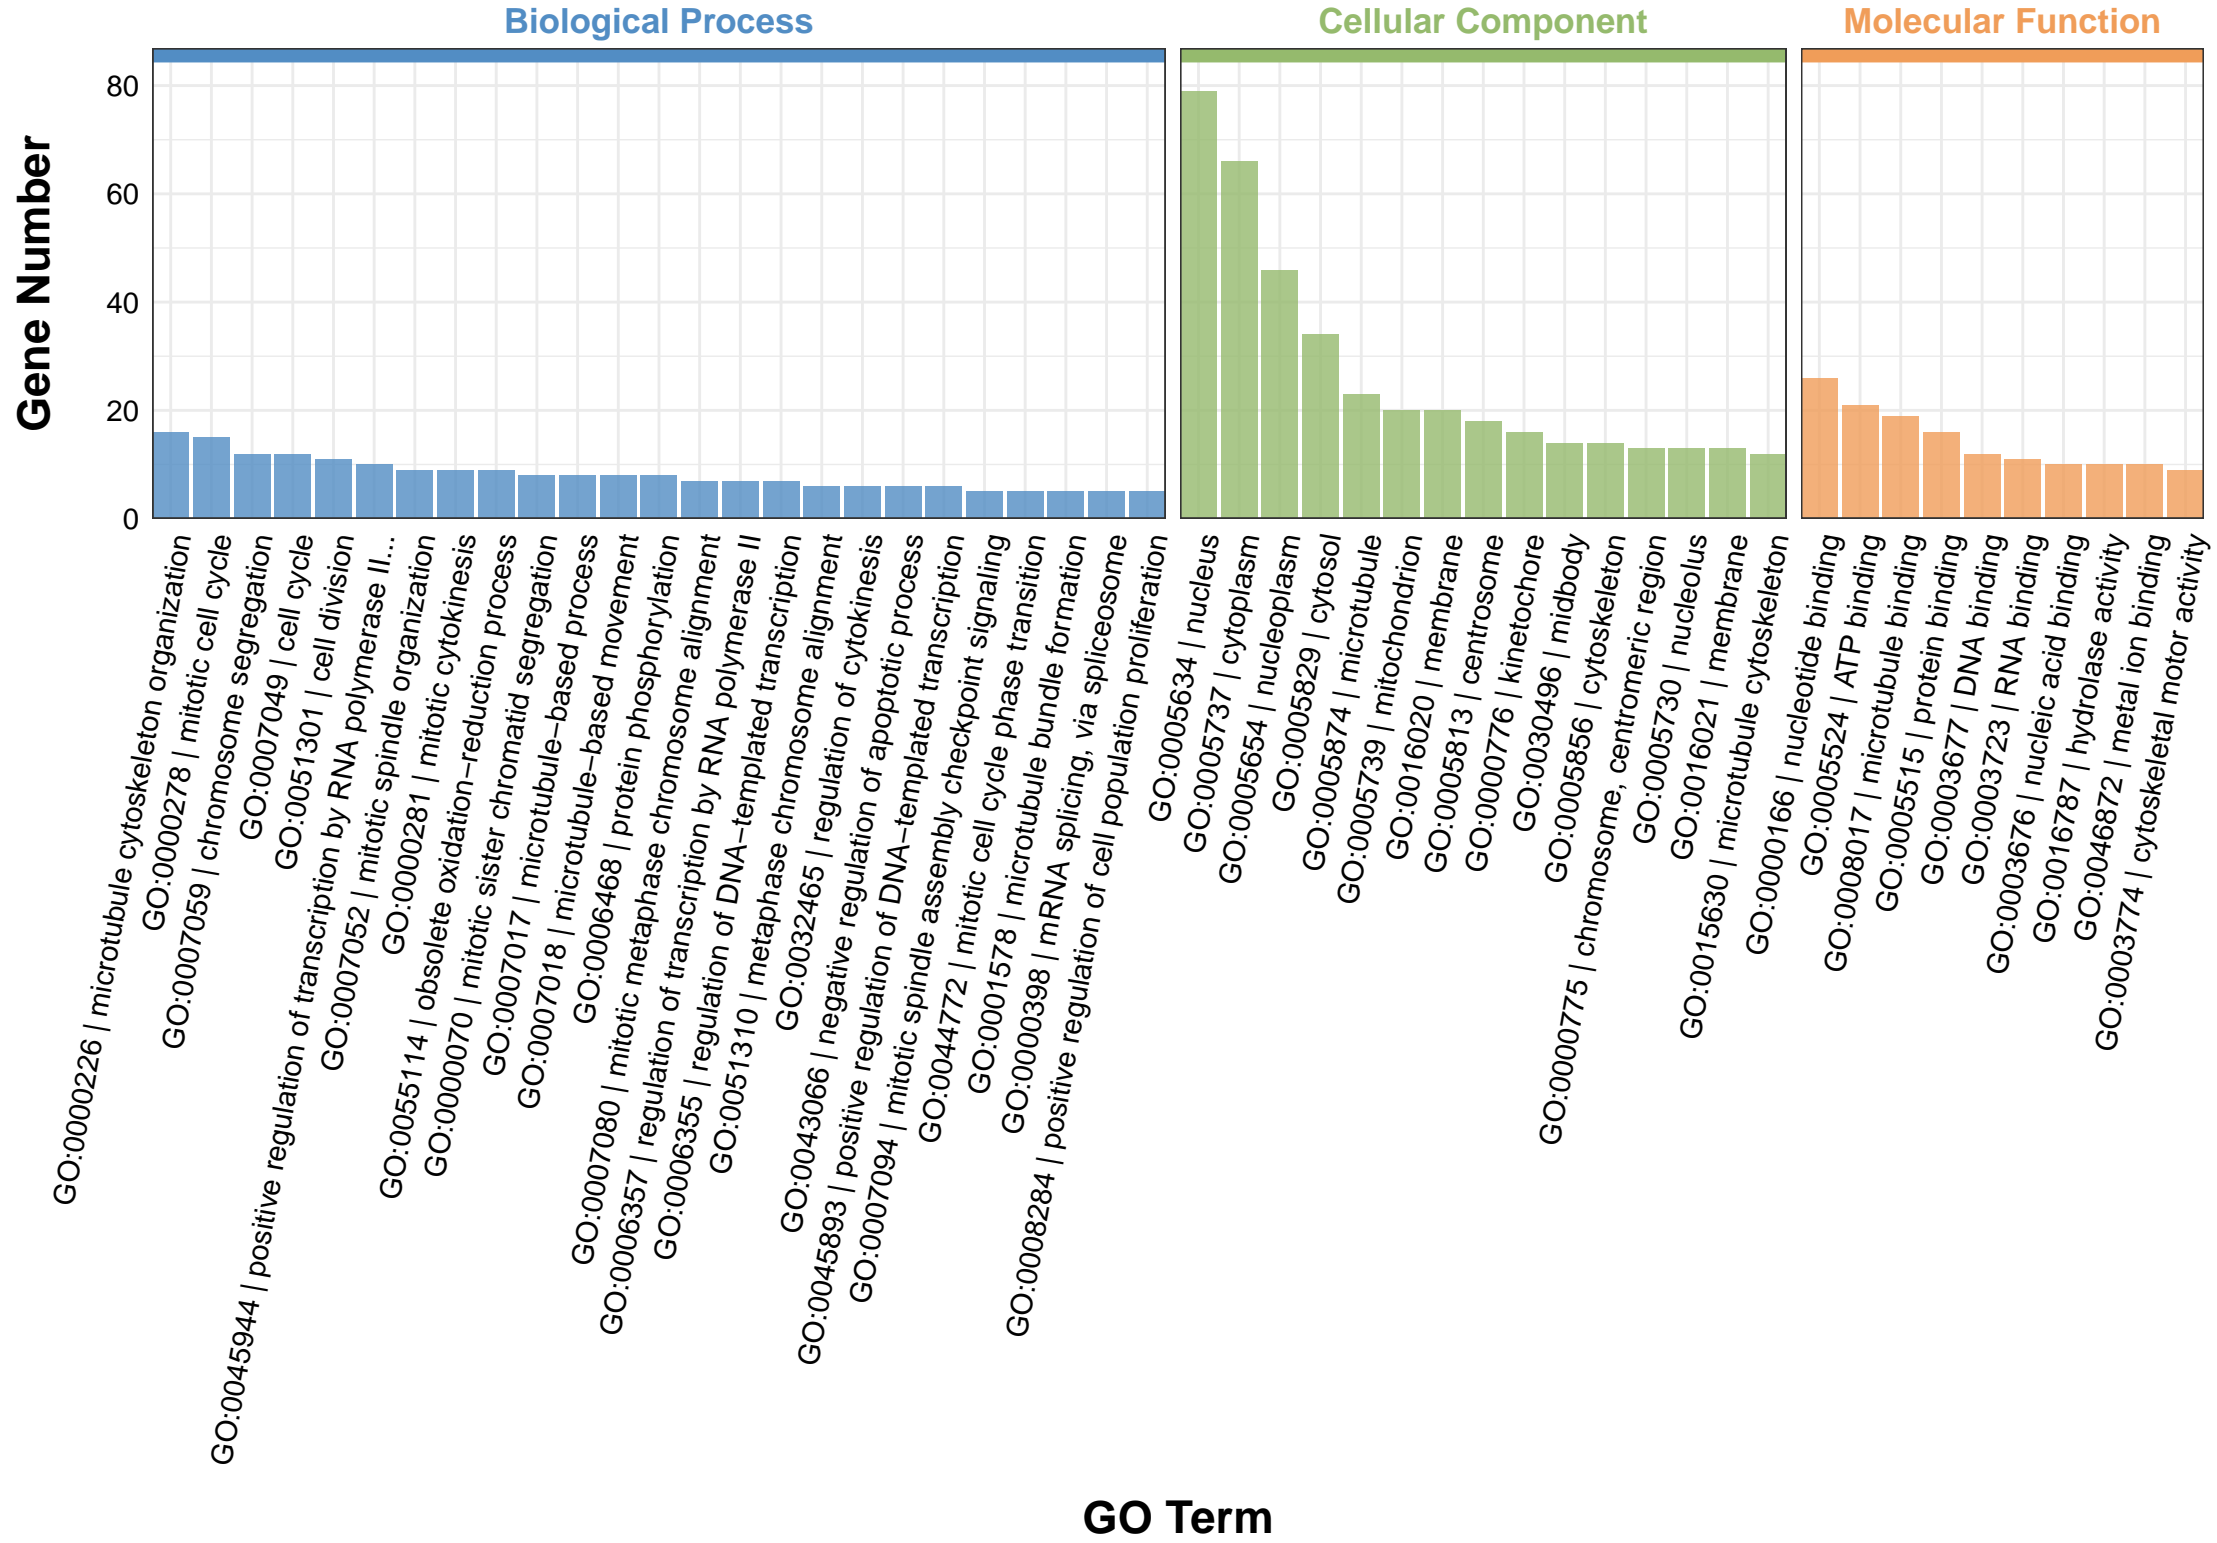

# GO Enrichment ScatterPlot

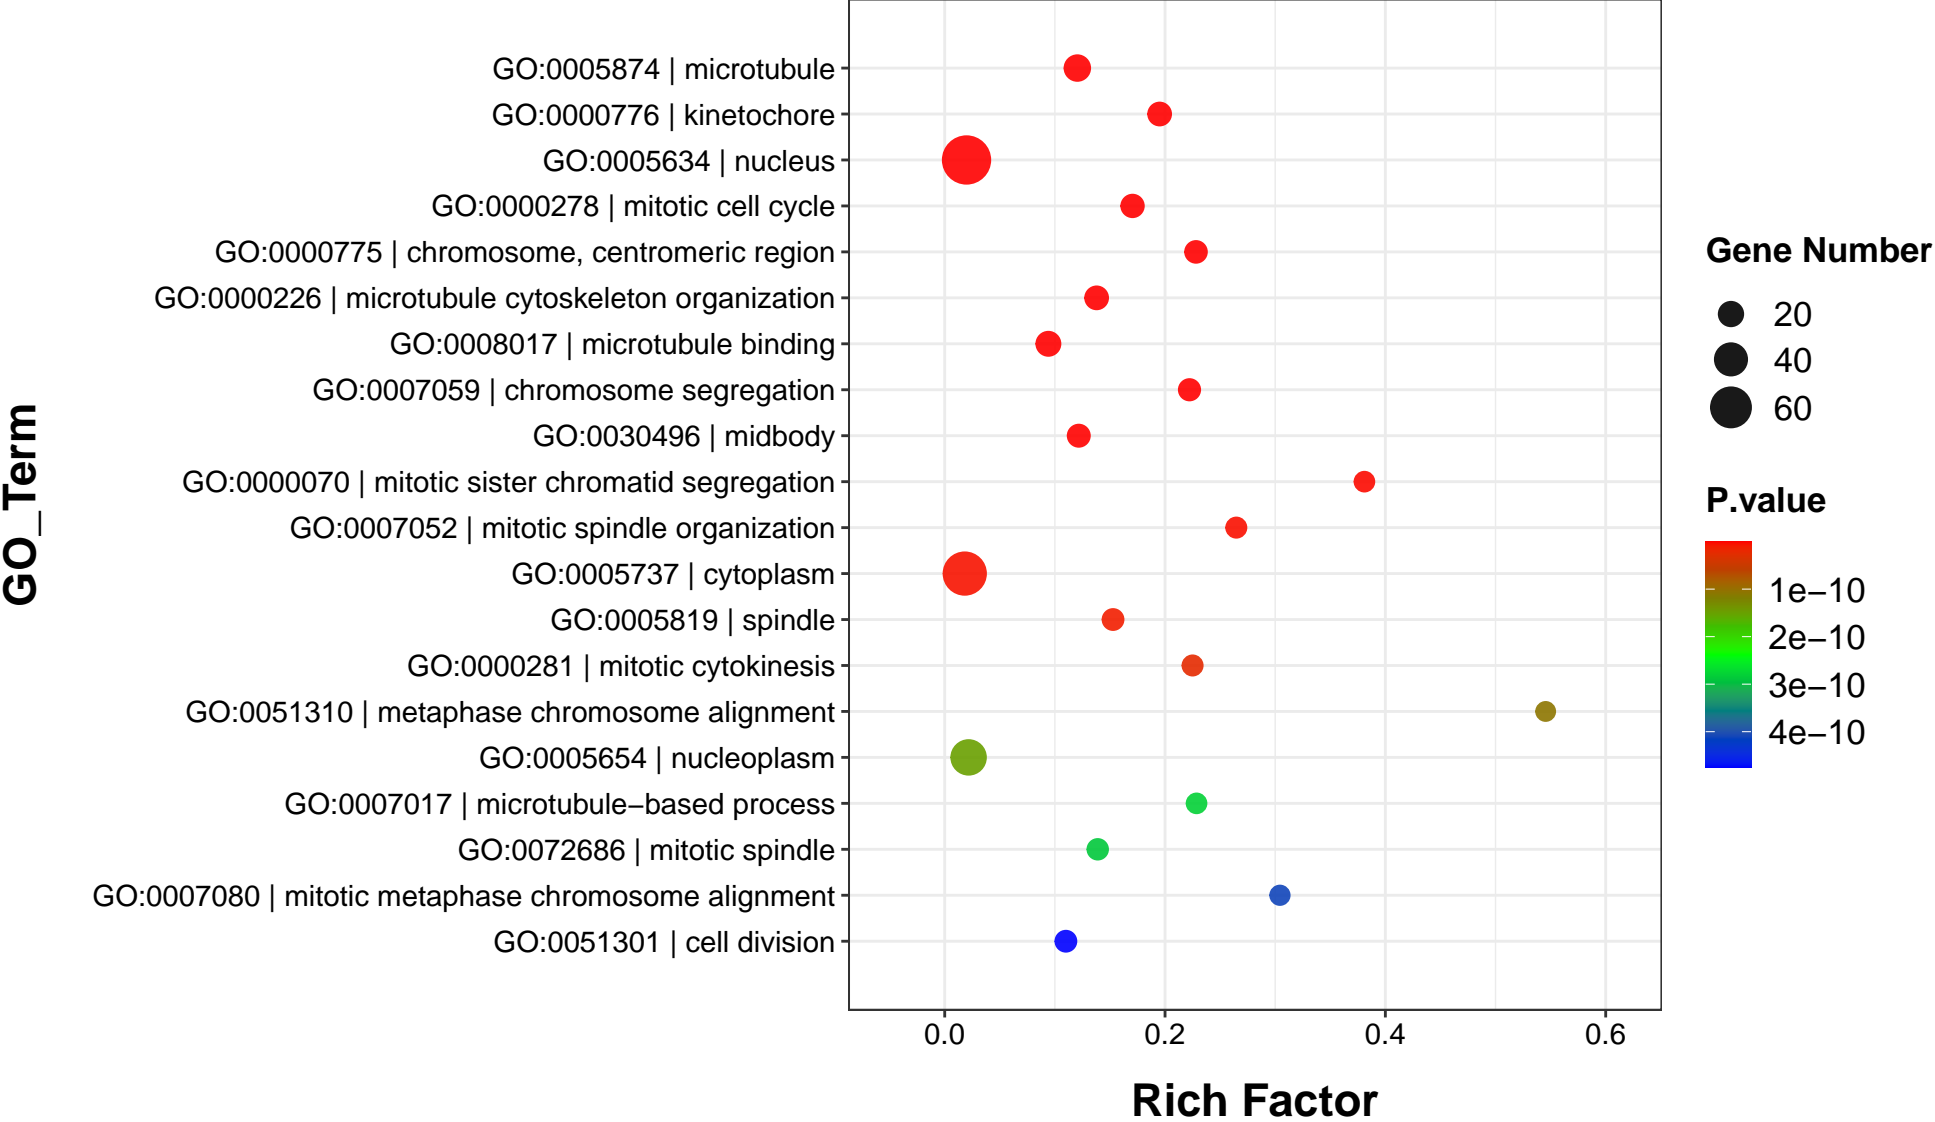

# KEGG Enrichment BarPlot

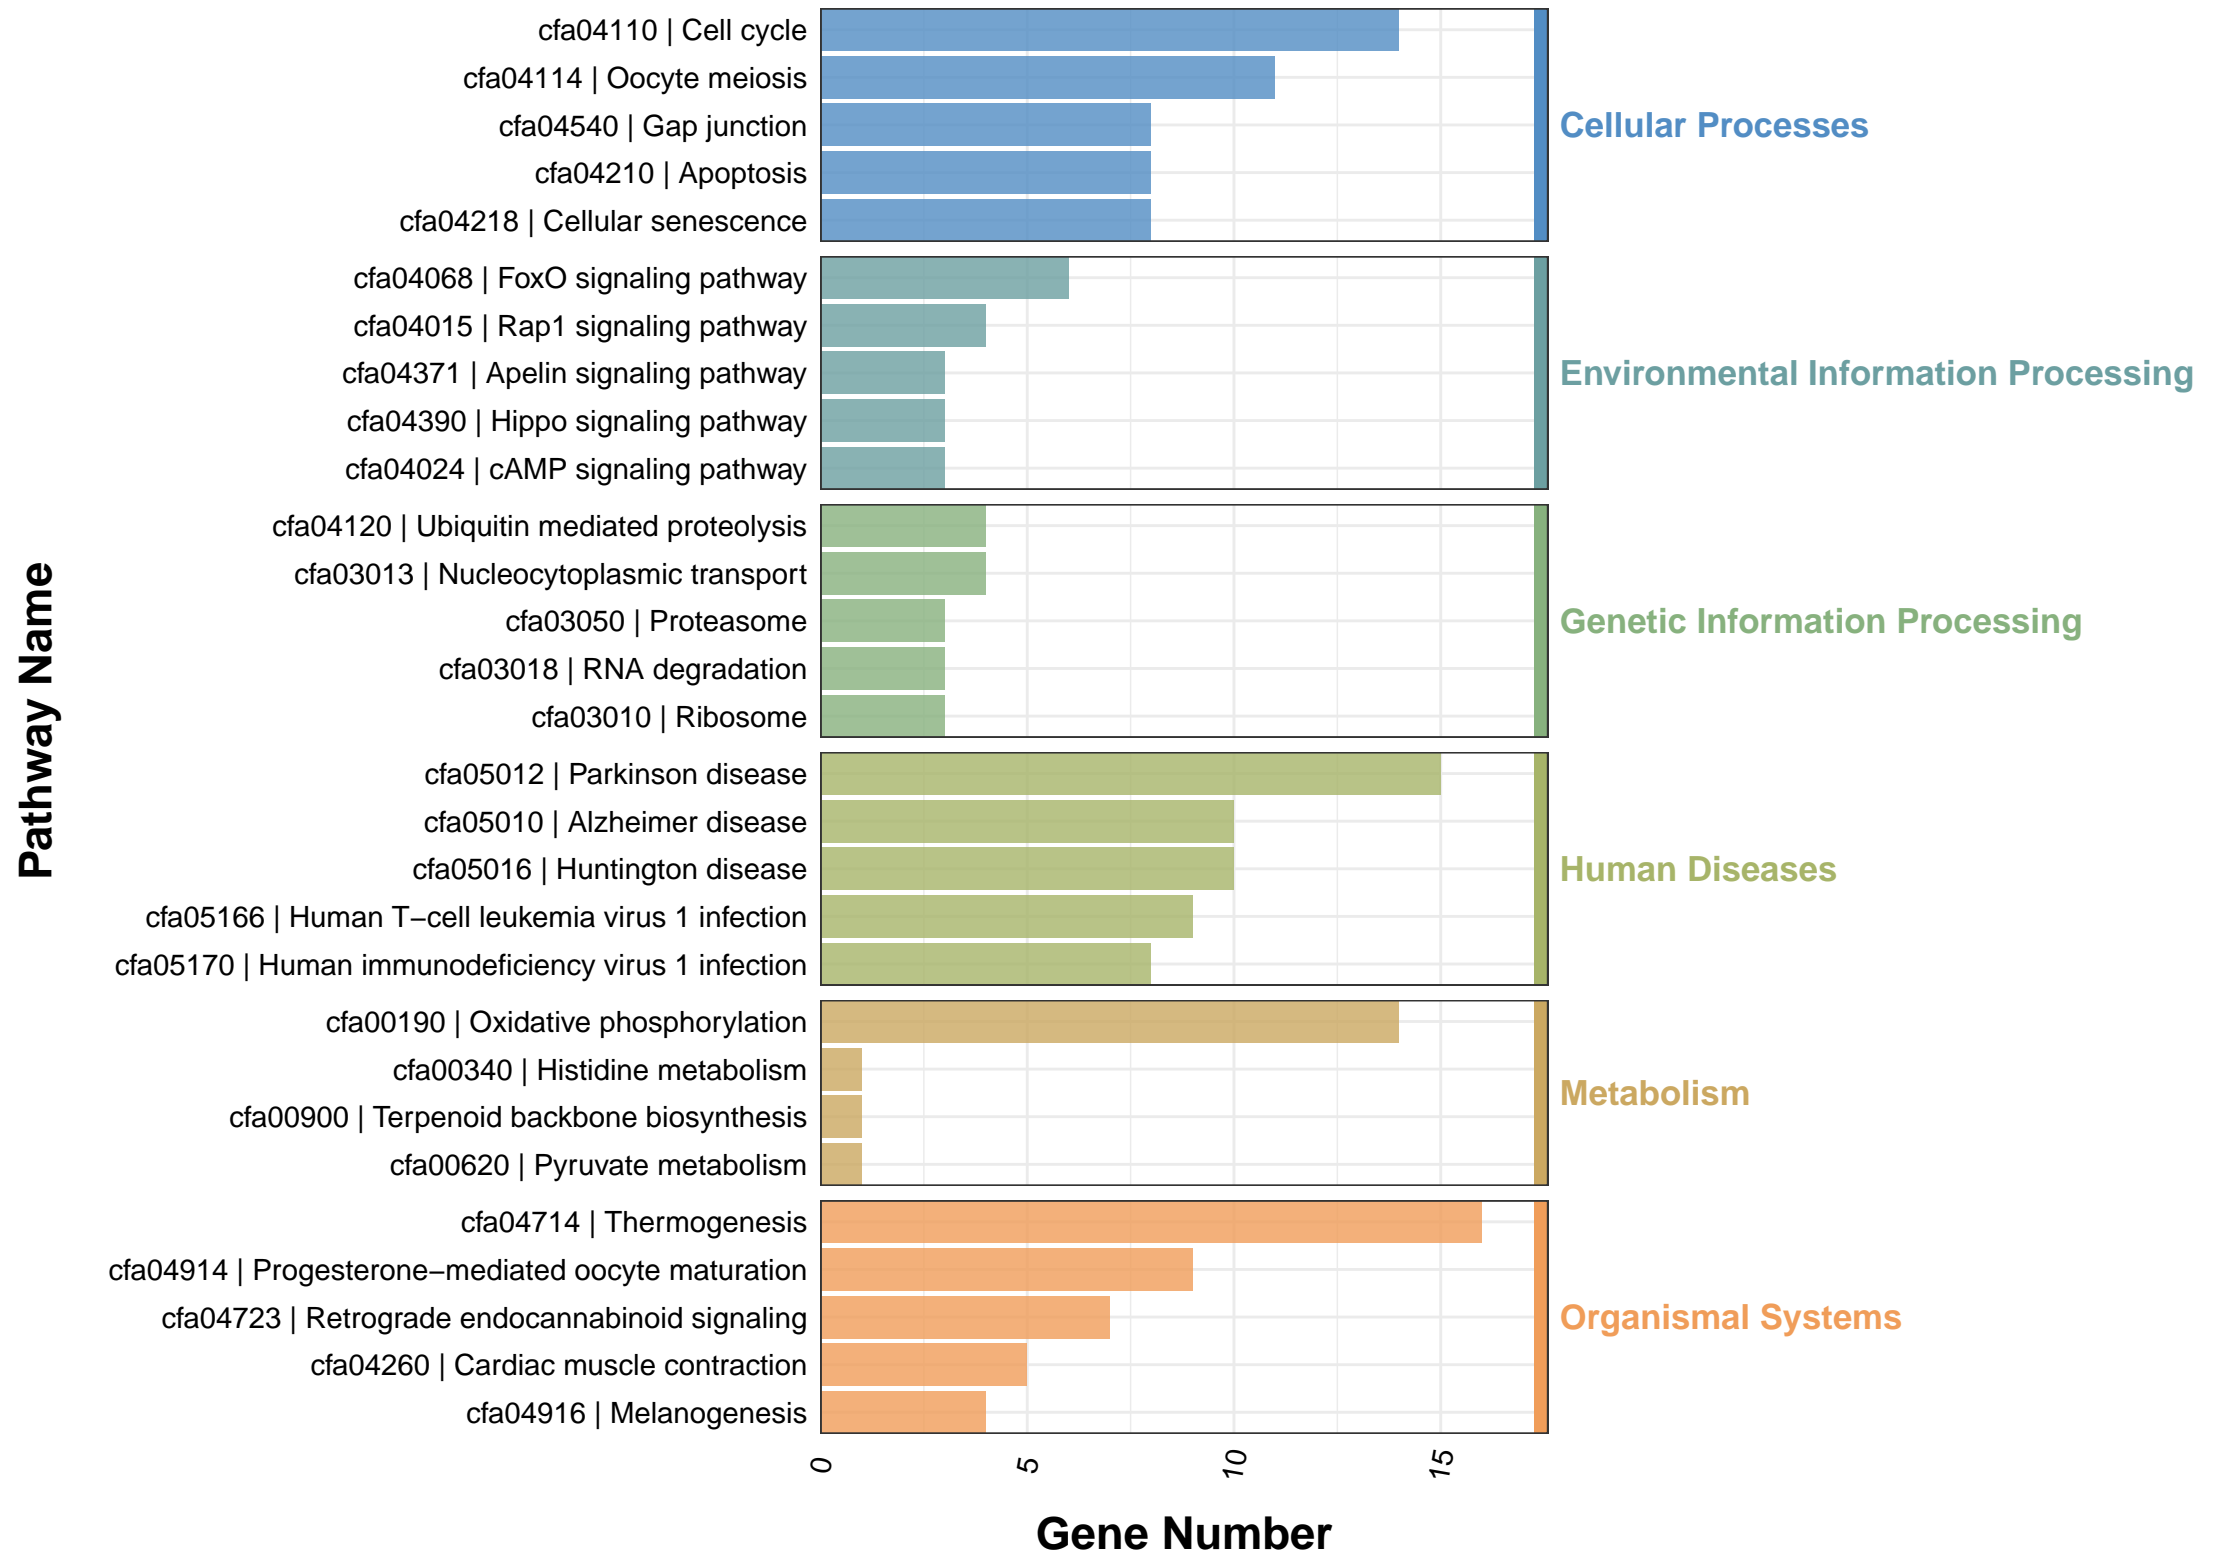

# KEGG Enrichment ScatterPlot

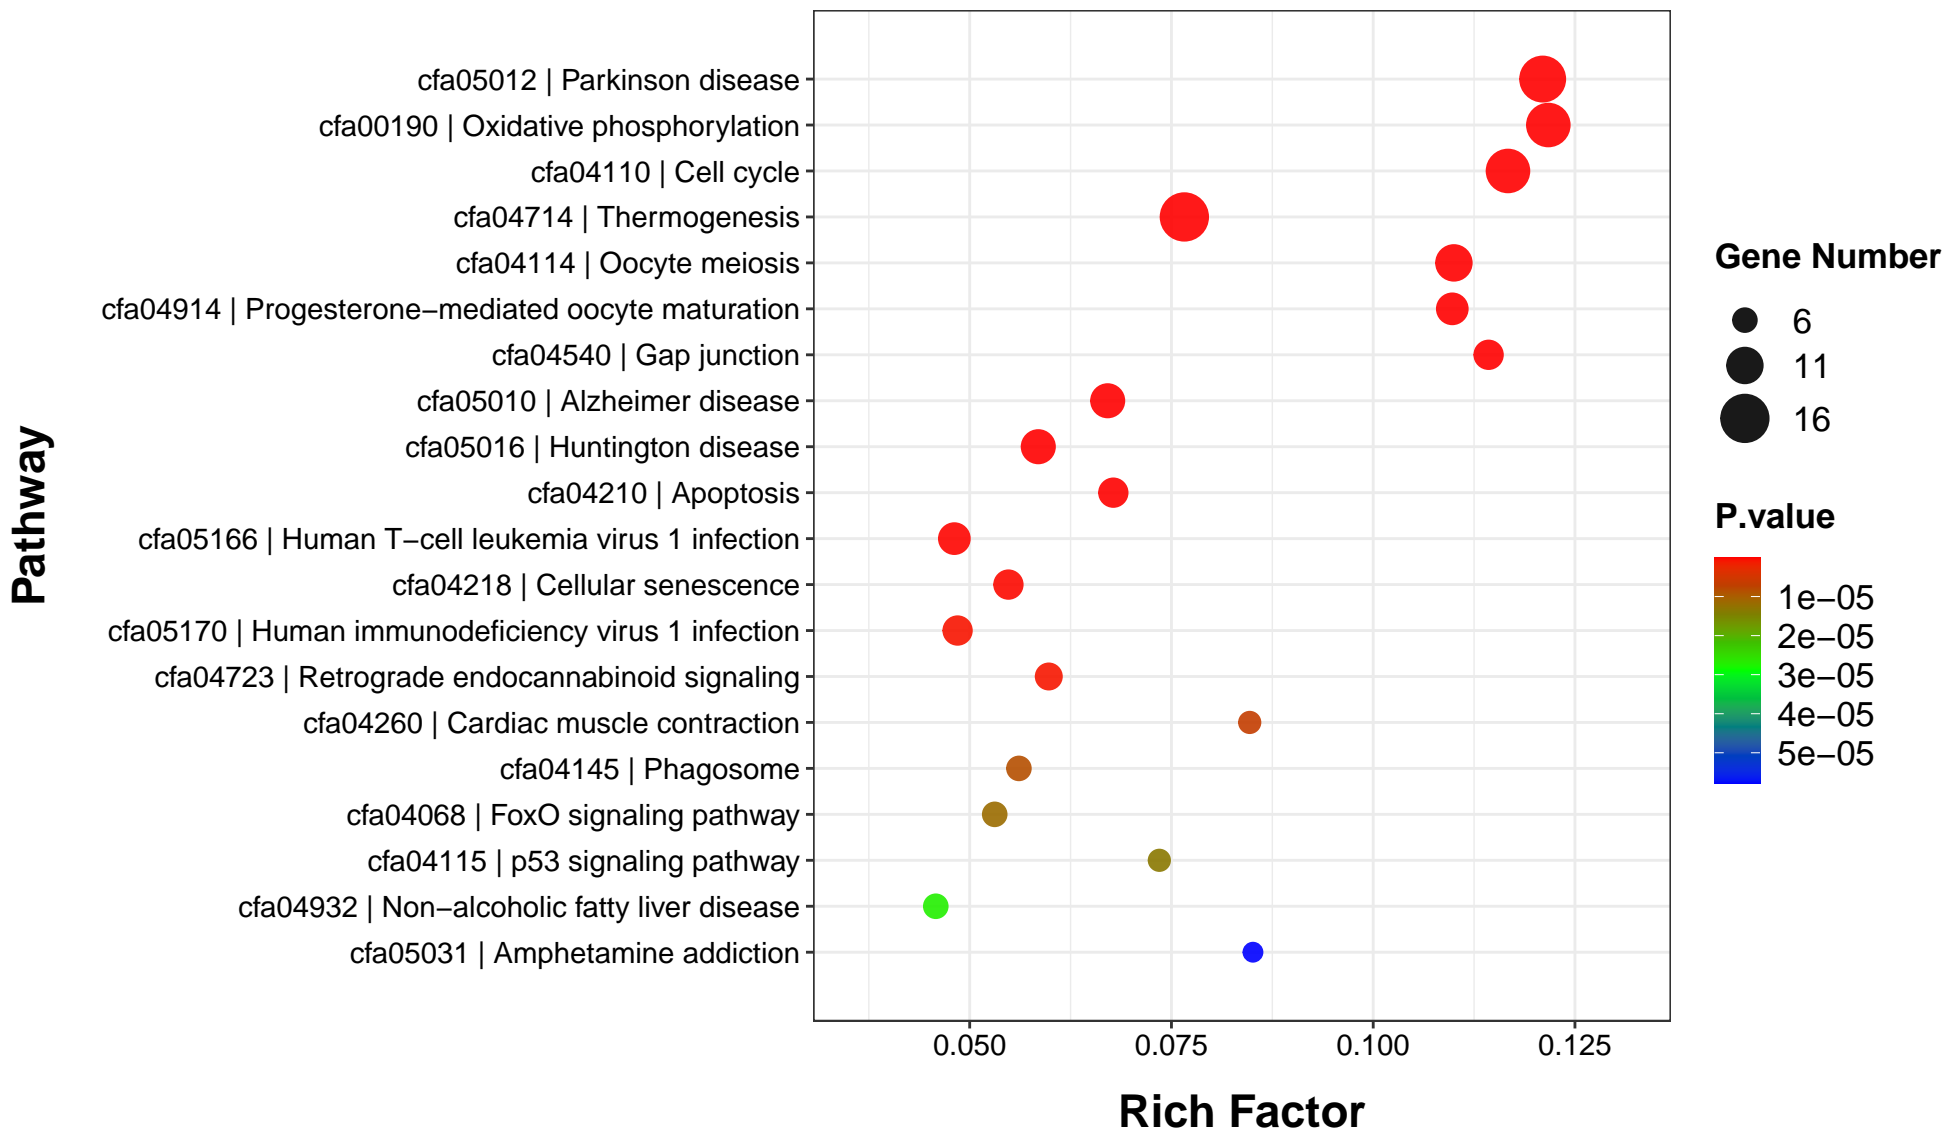



# GO Enrichment BarPlot

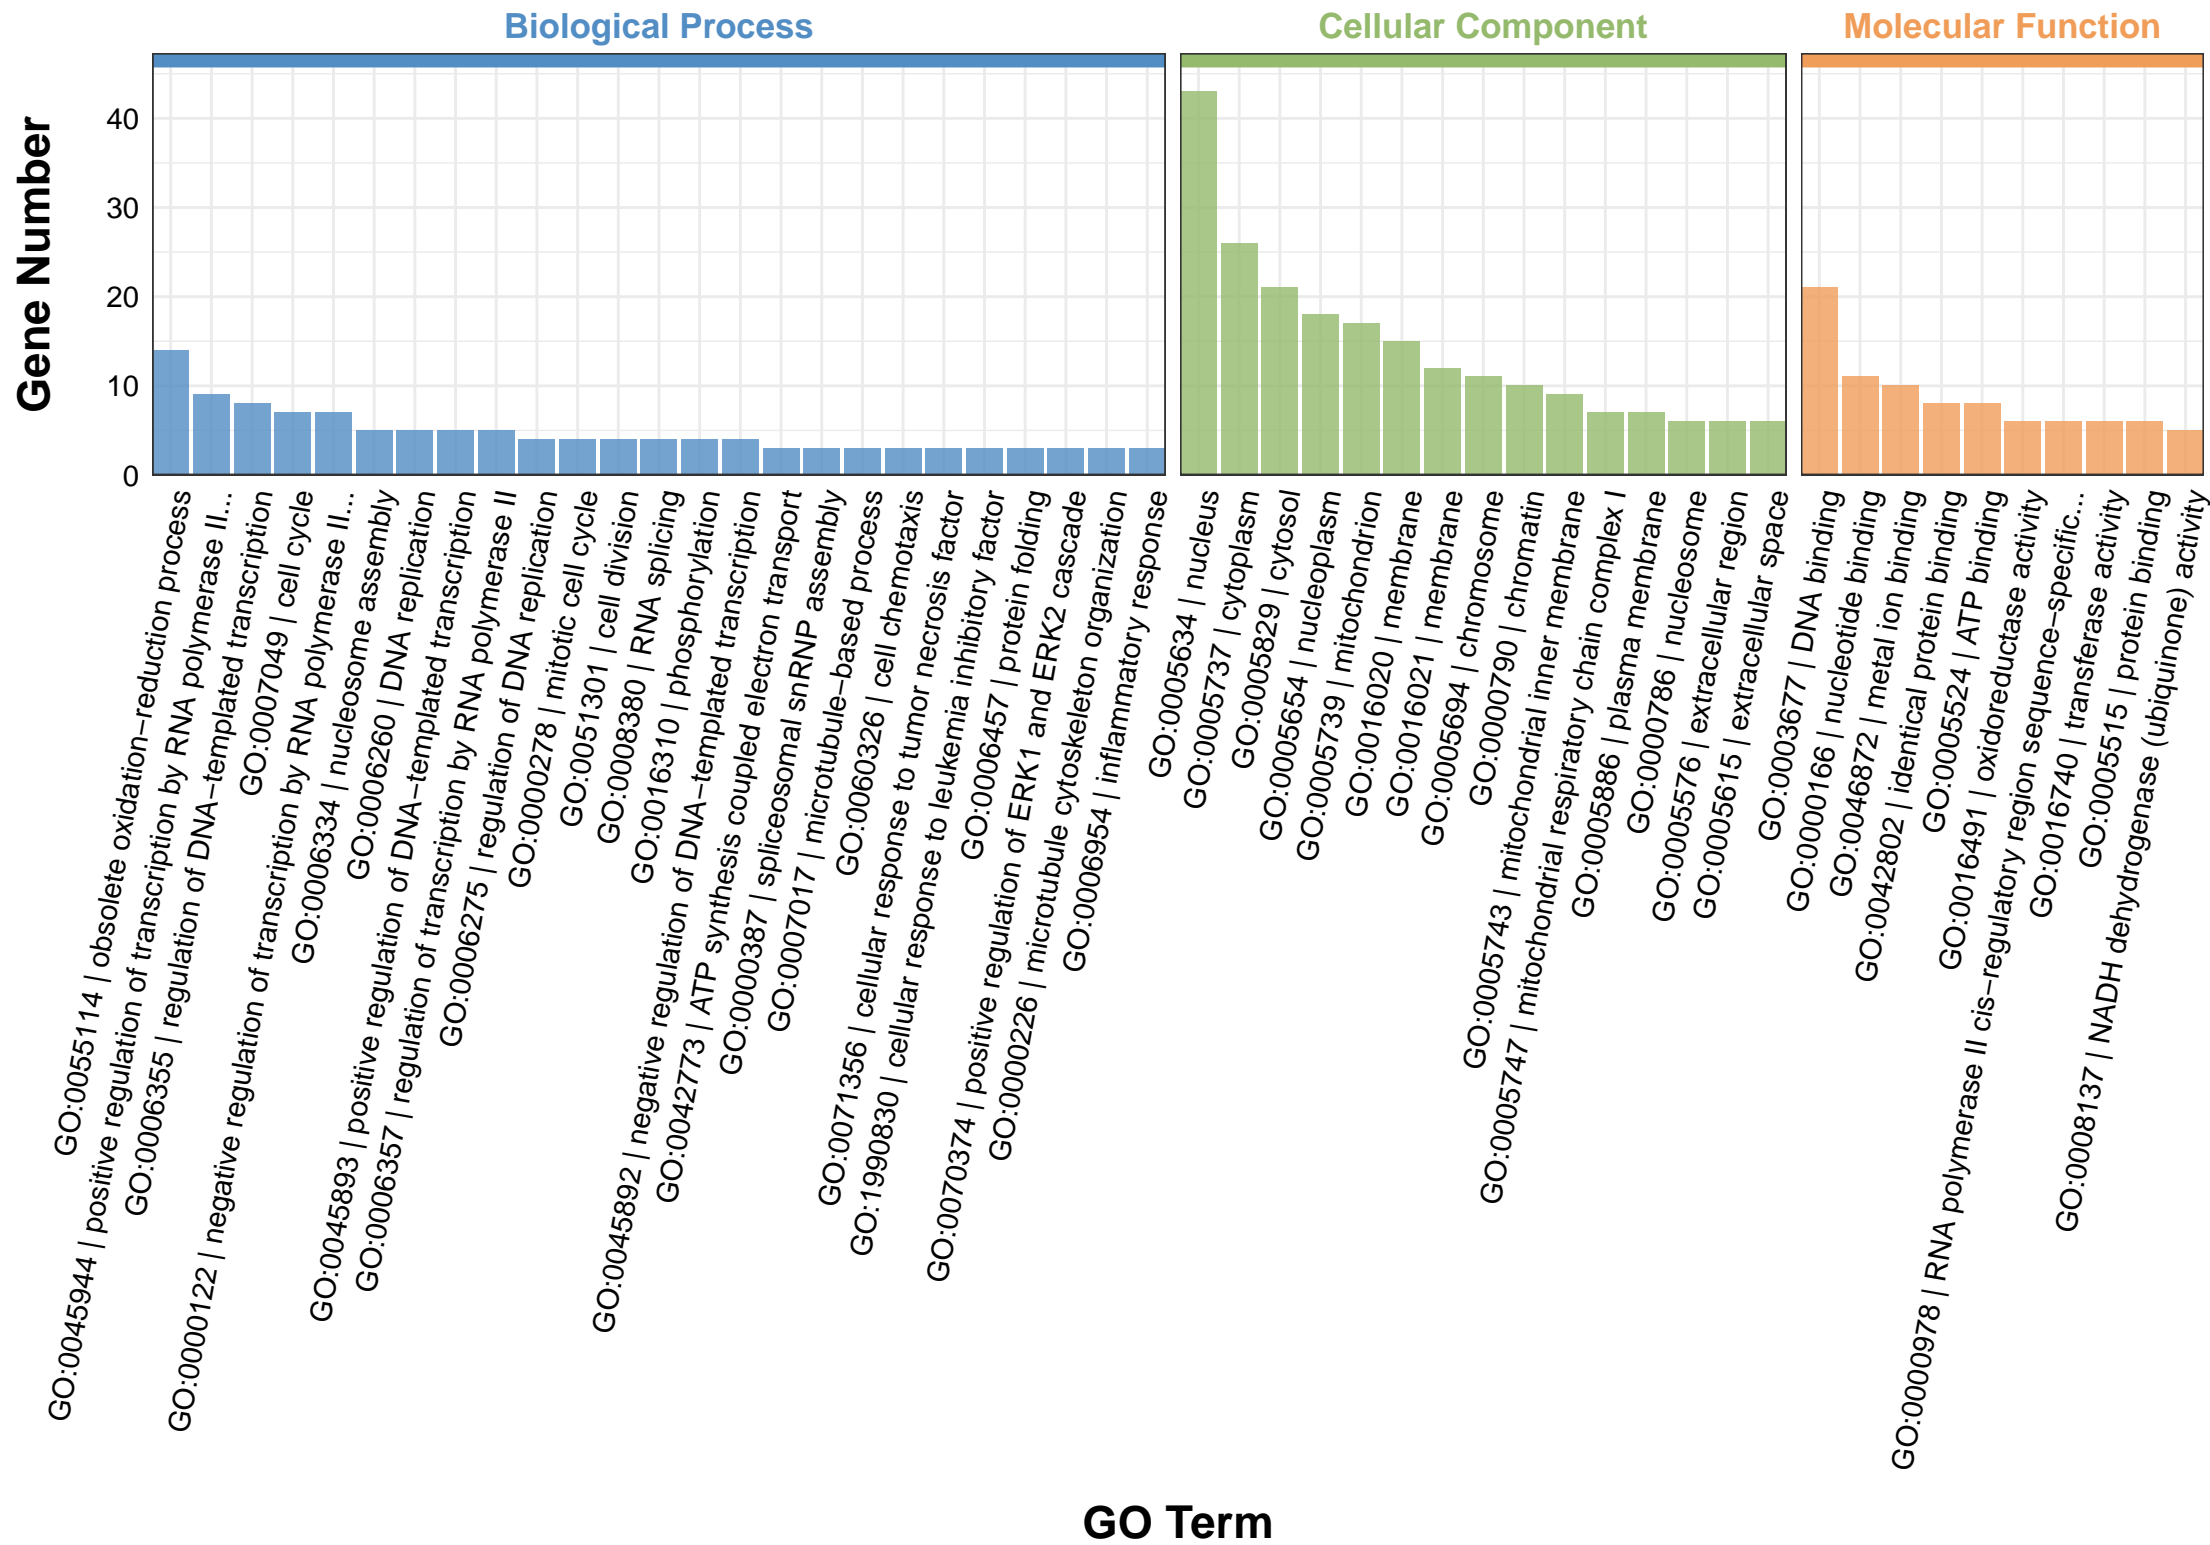

# GO Enrichment ScatterPlot

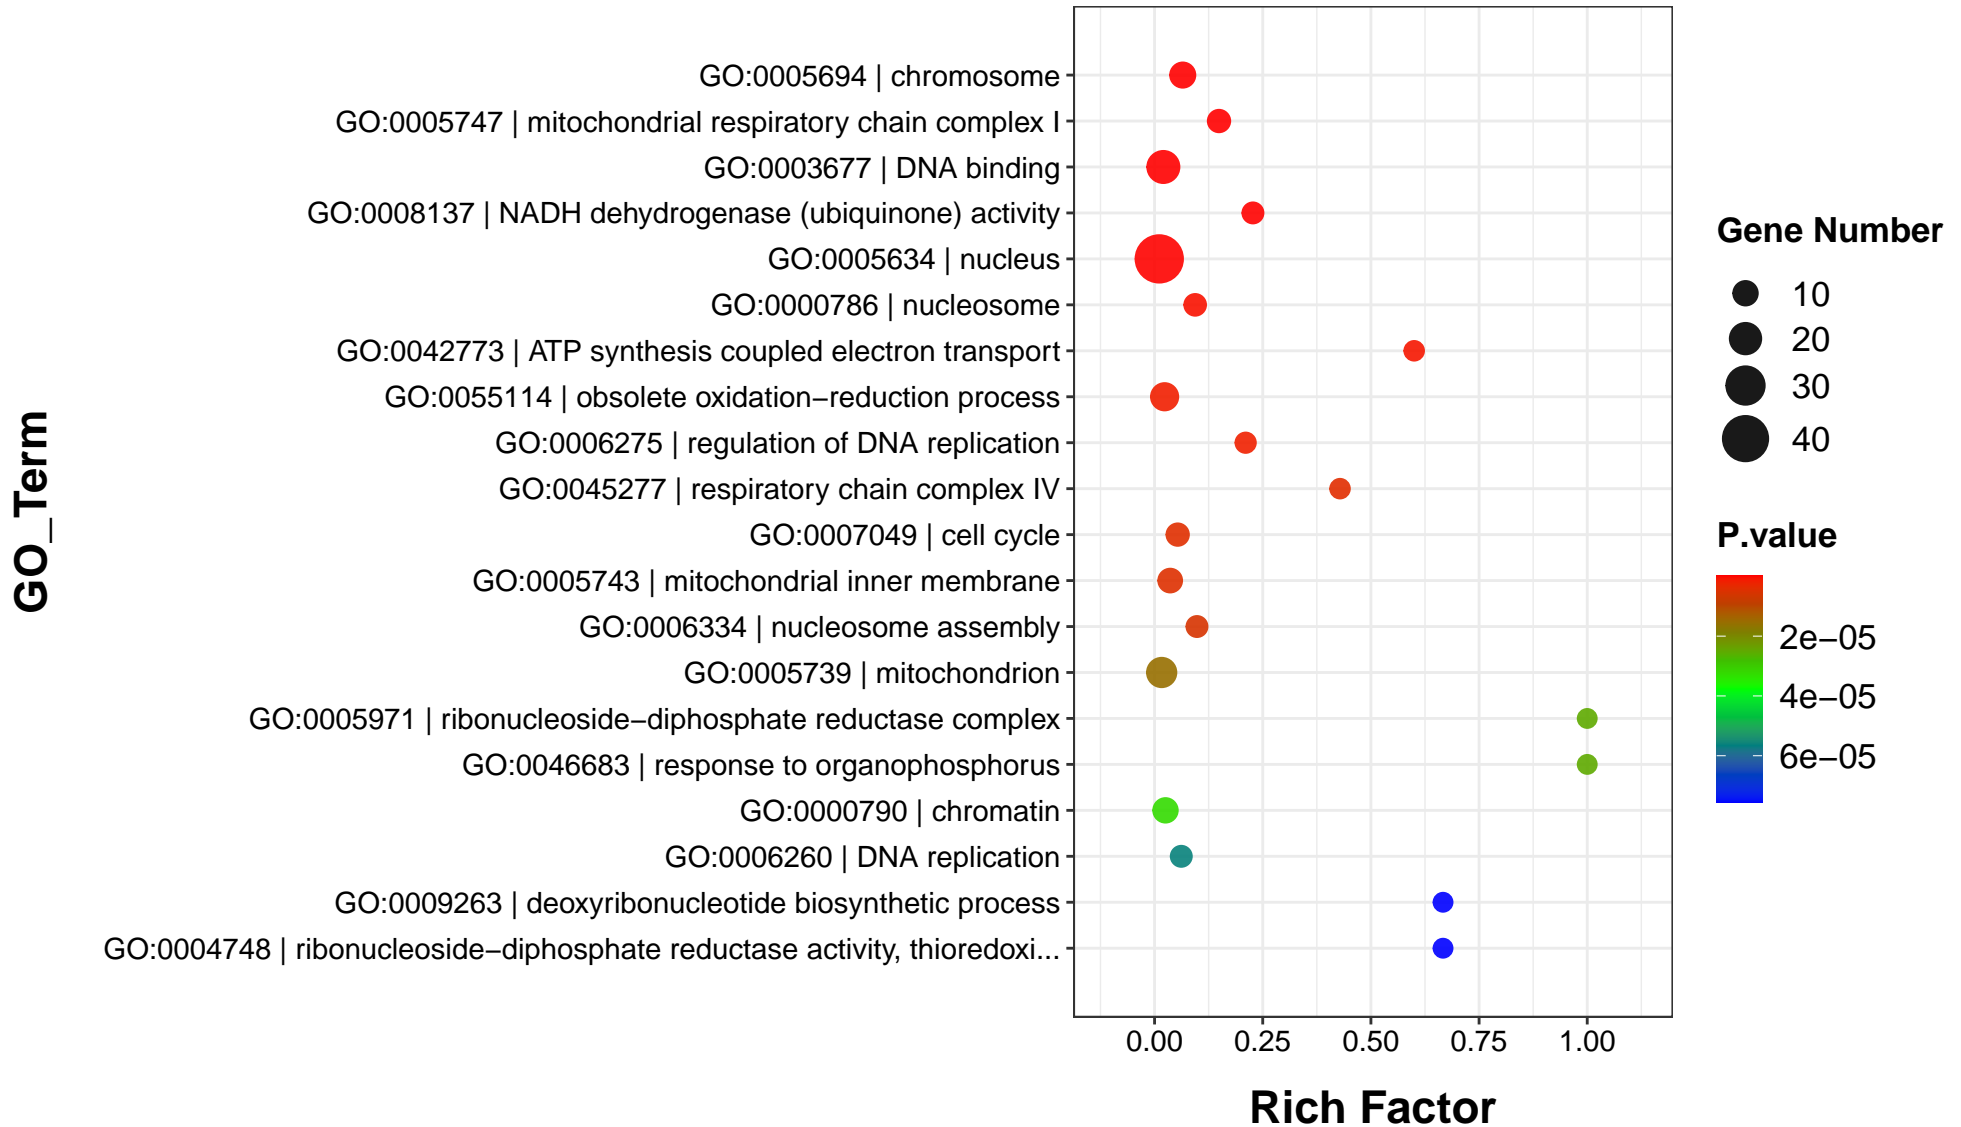

# KEGG Enrichment BarPlot

Pathway Name

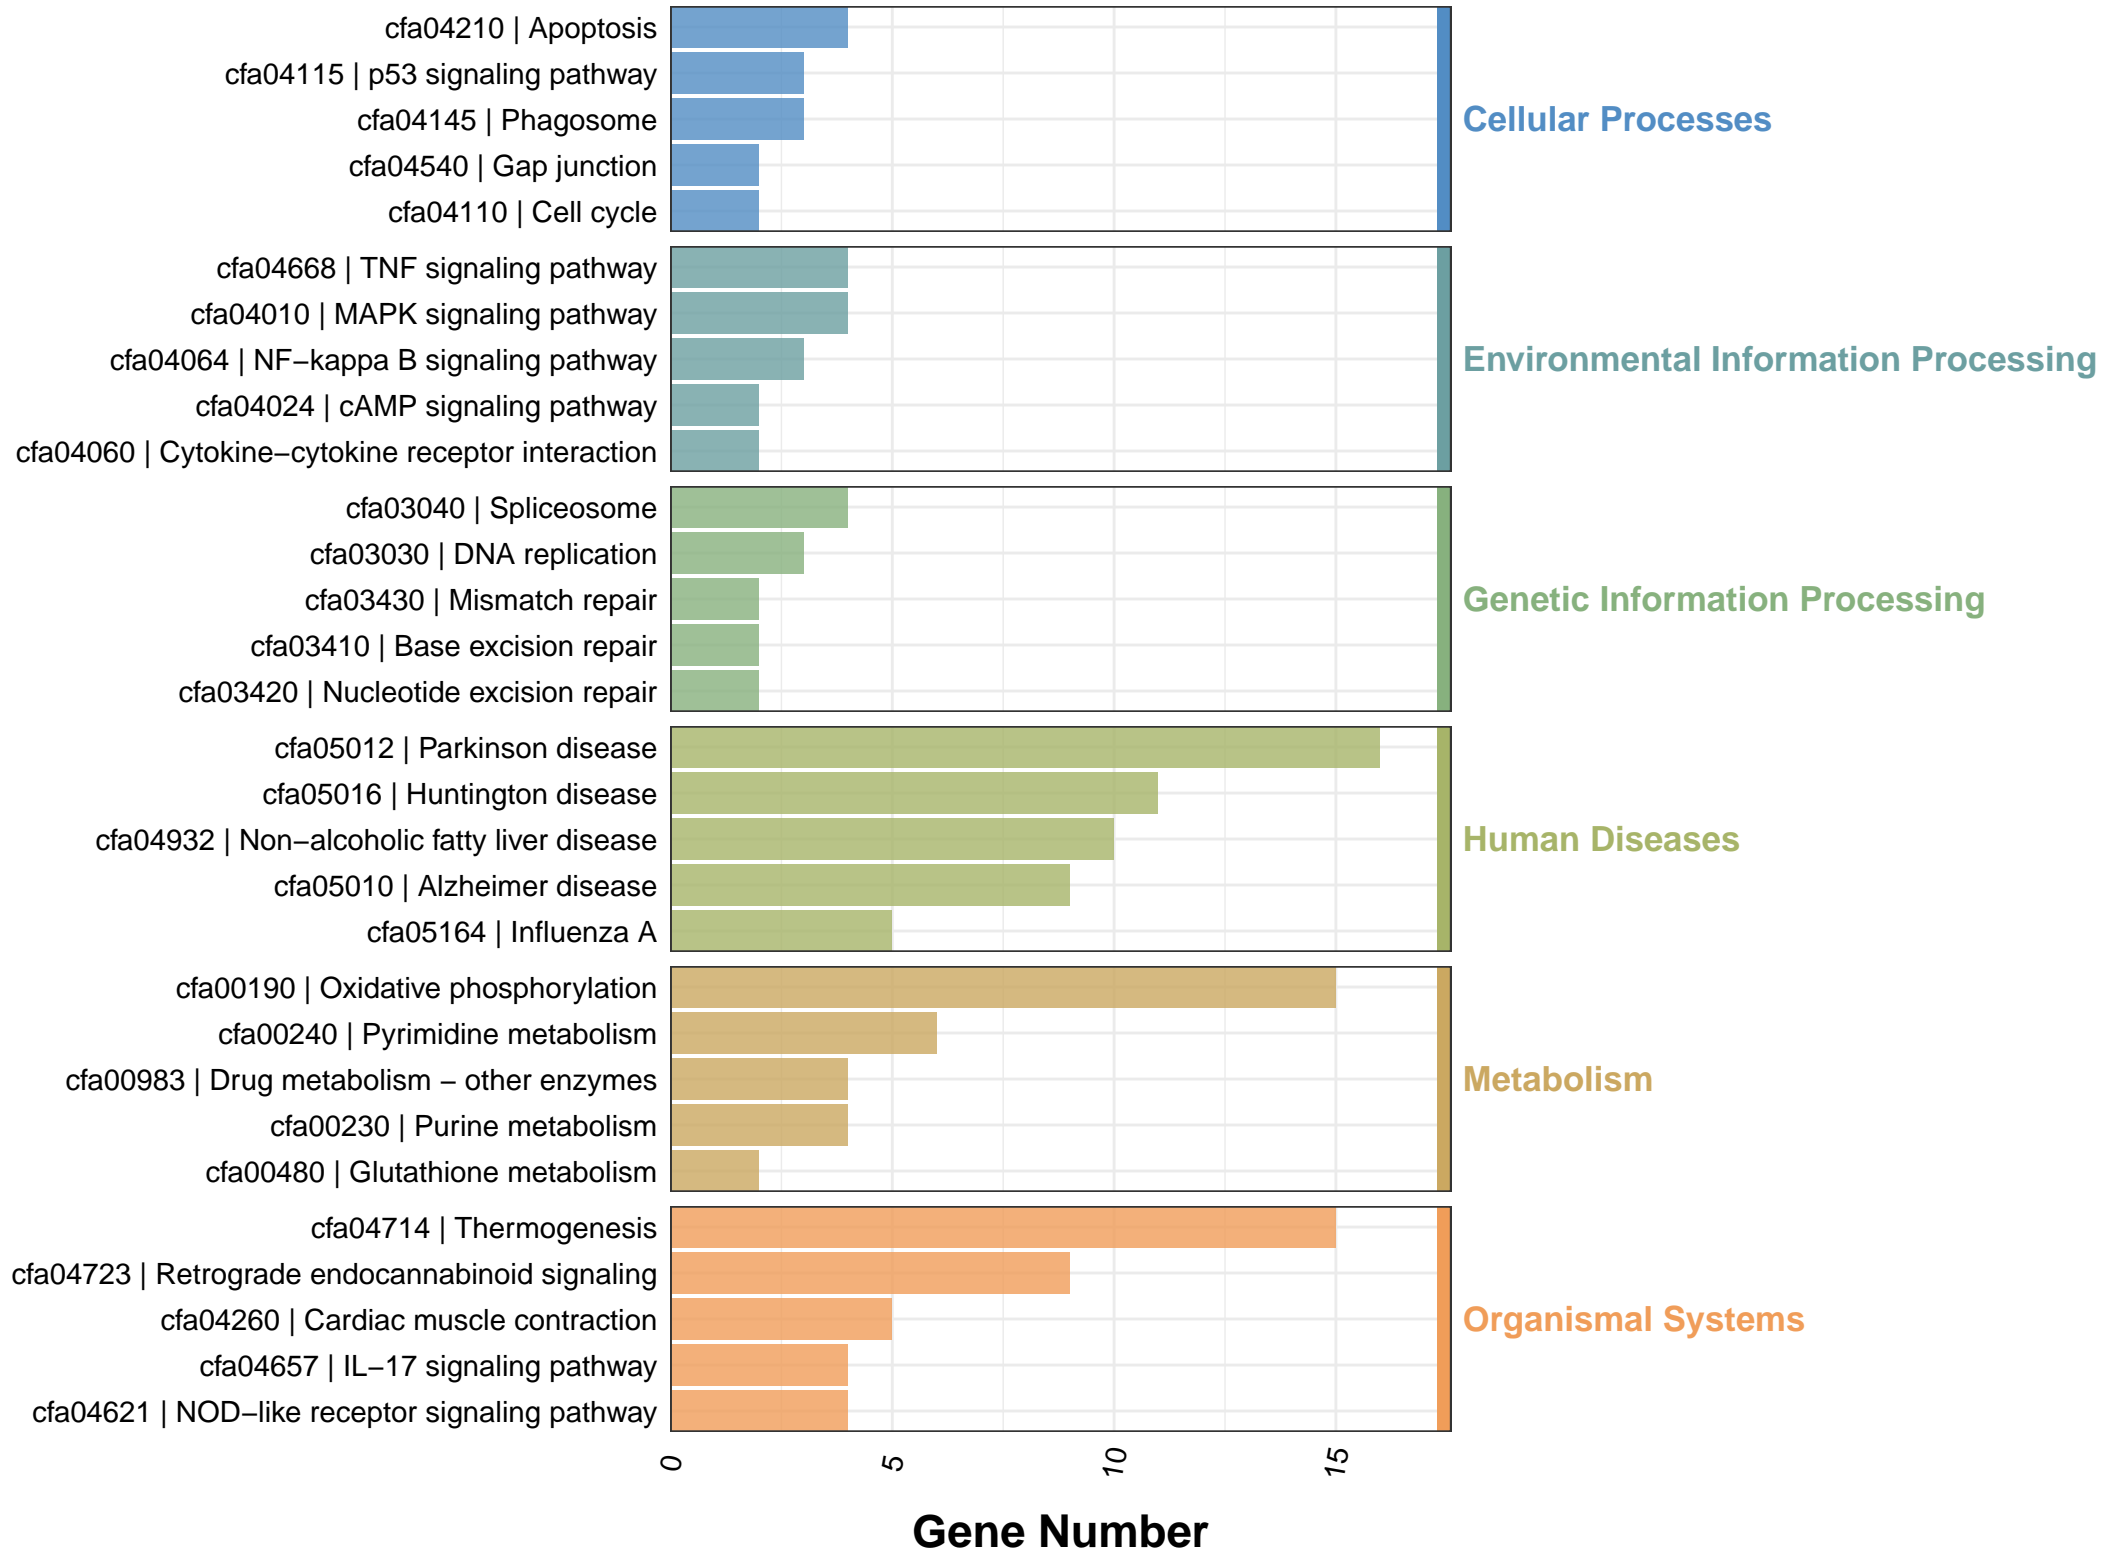

# KEGG Enrichment ScatterPlot

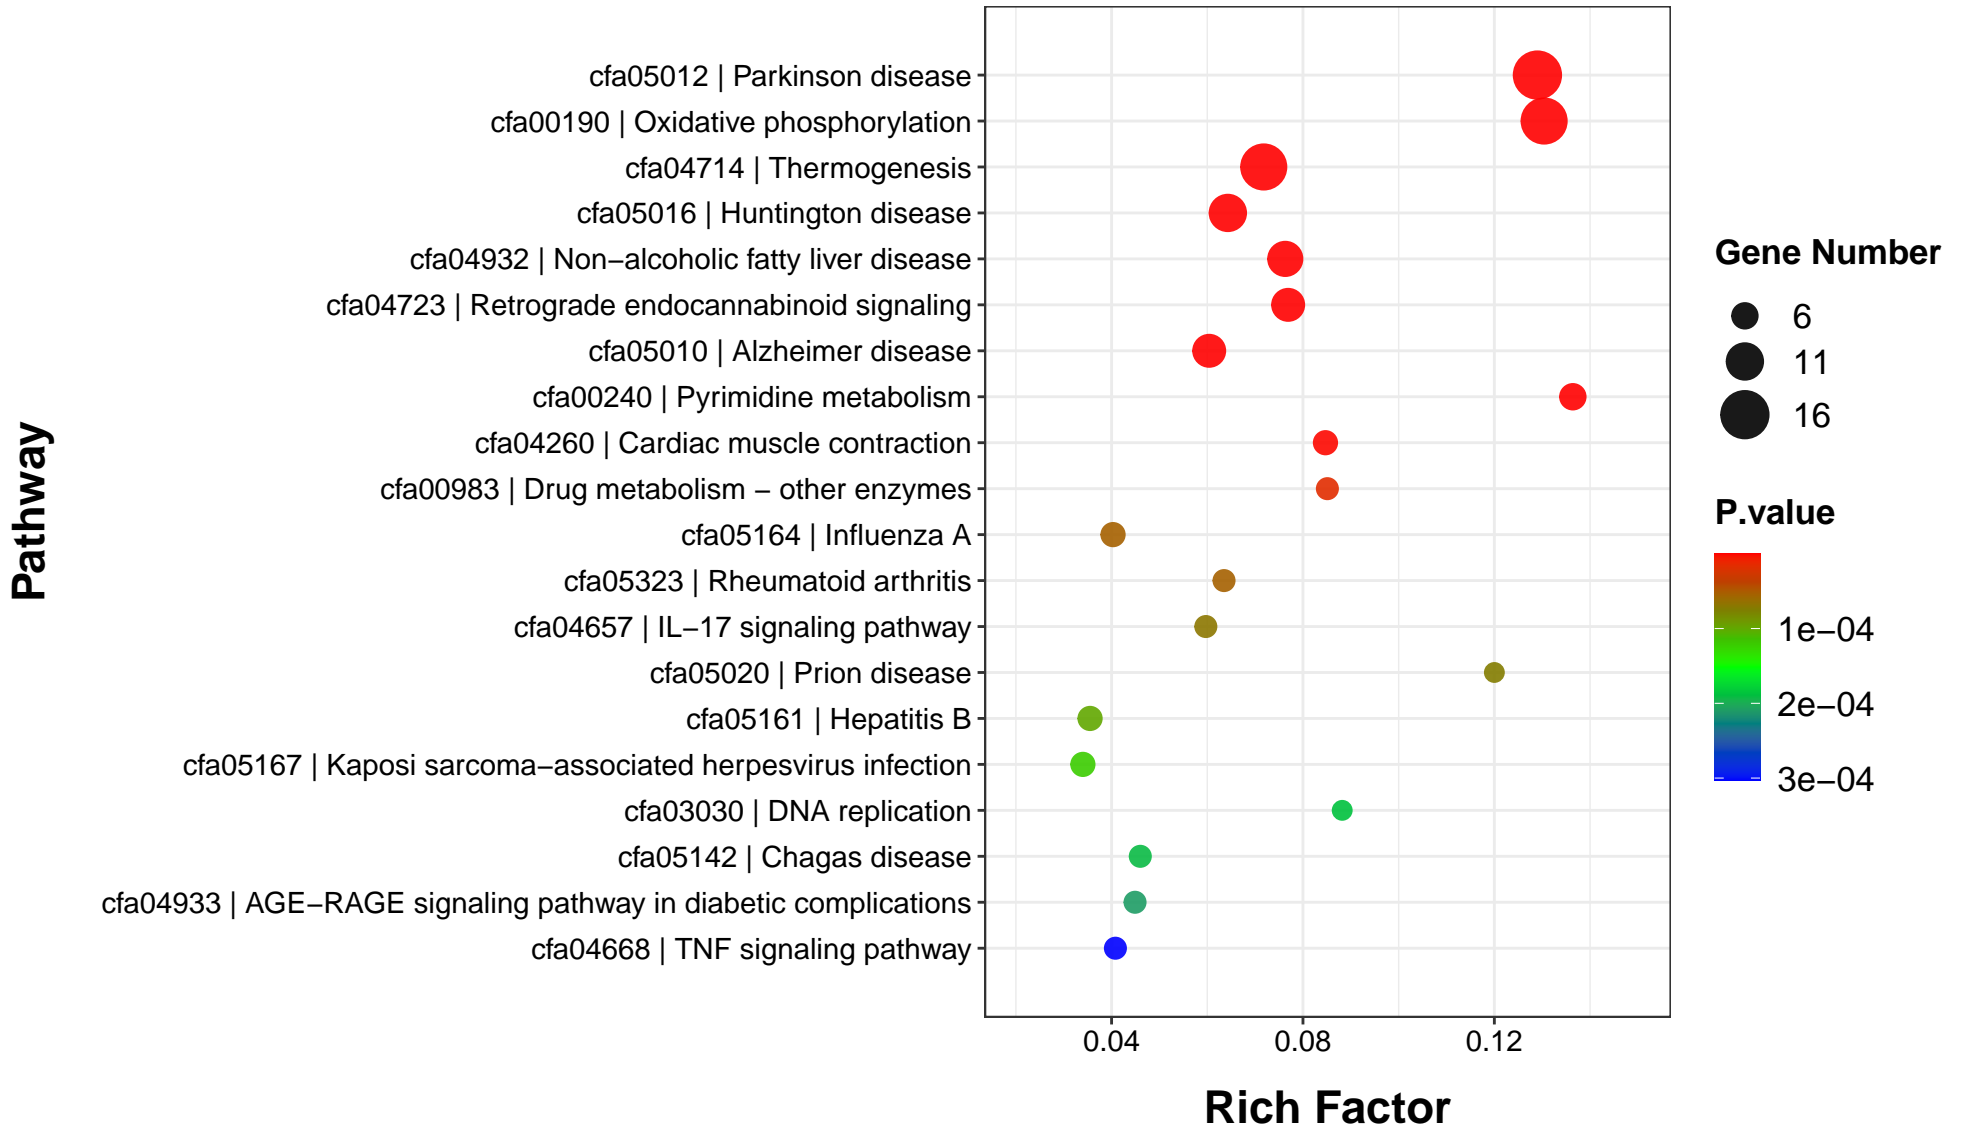

# GO Enrichment BarPlot

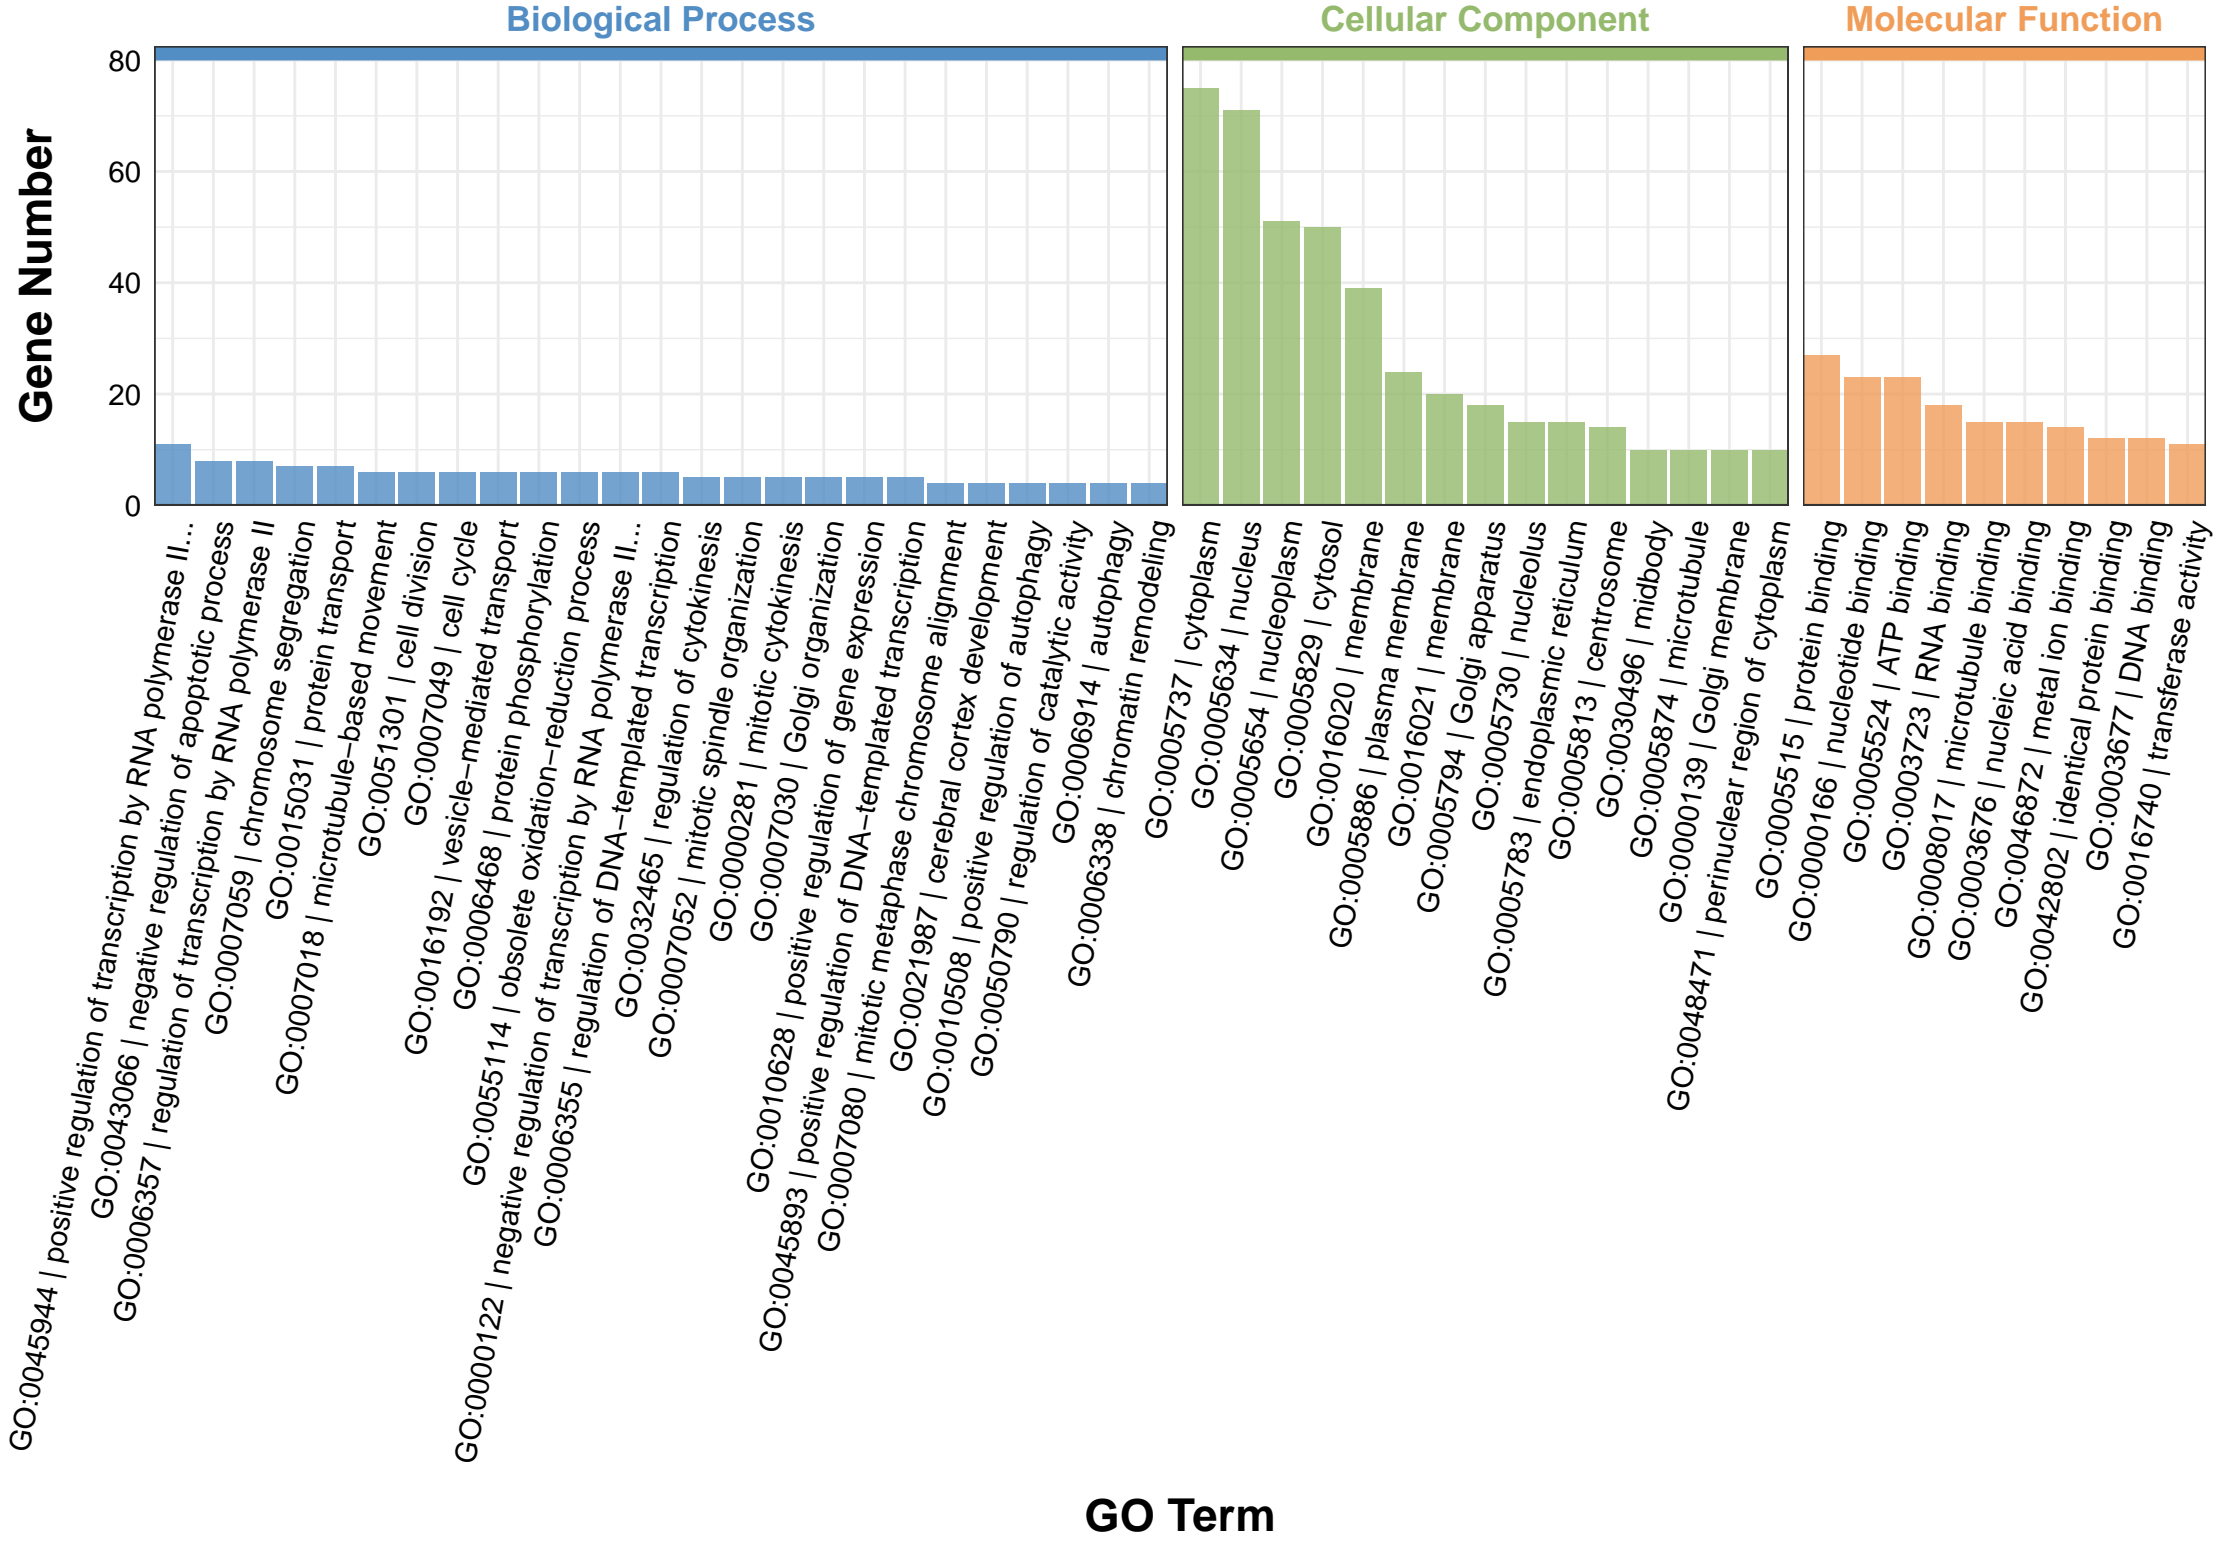

# GO Enrichment ScatterPlot

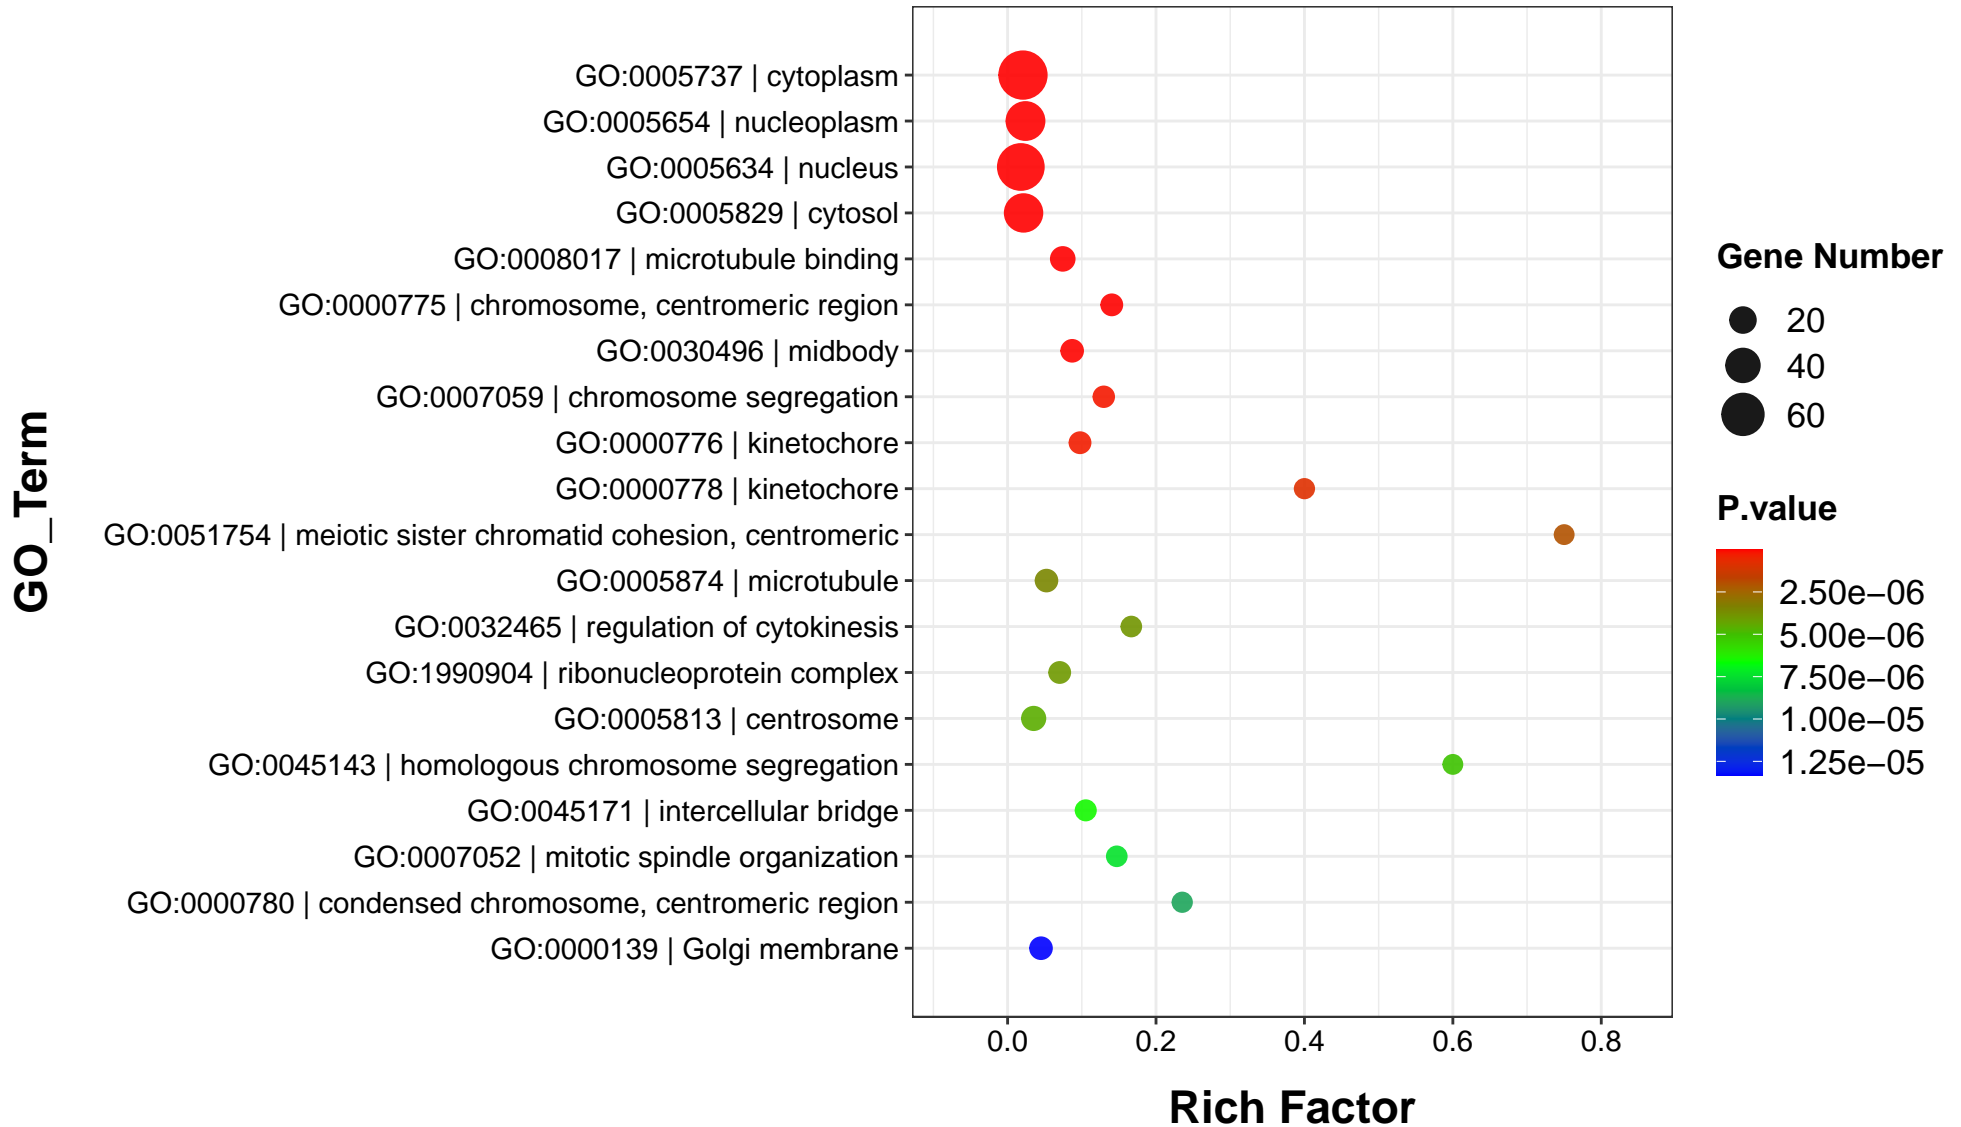

# KEGG Enrichment BarPlot

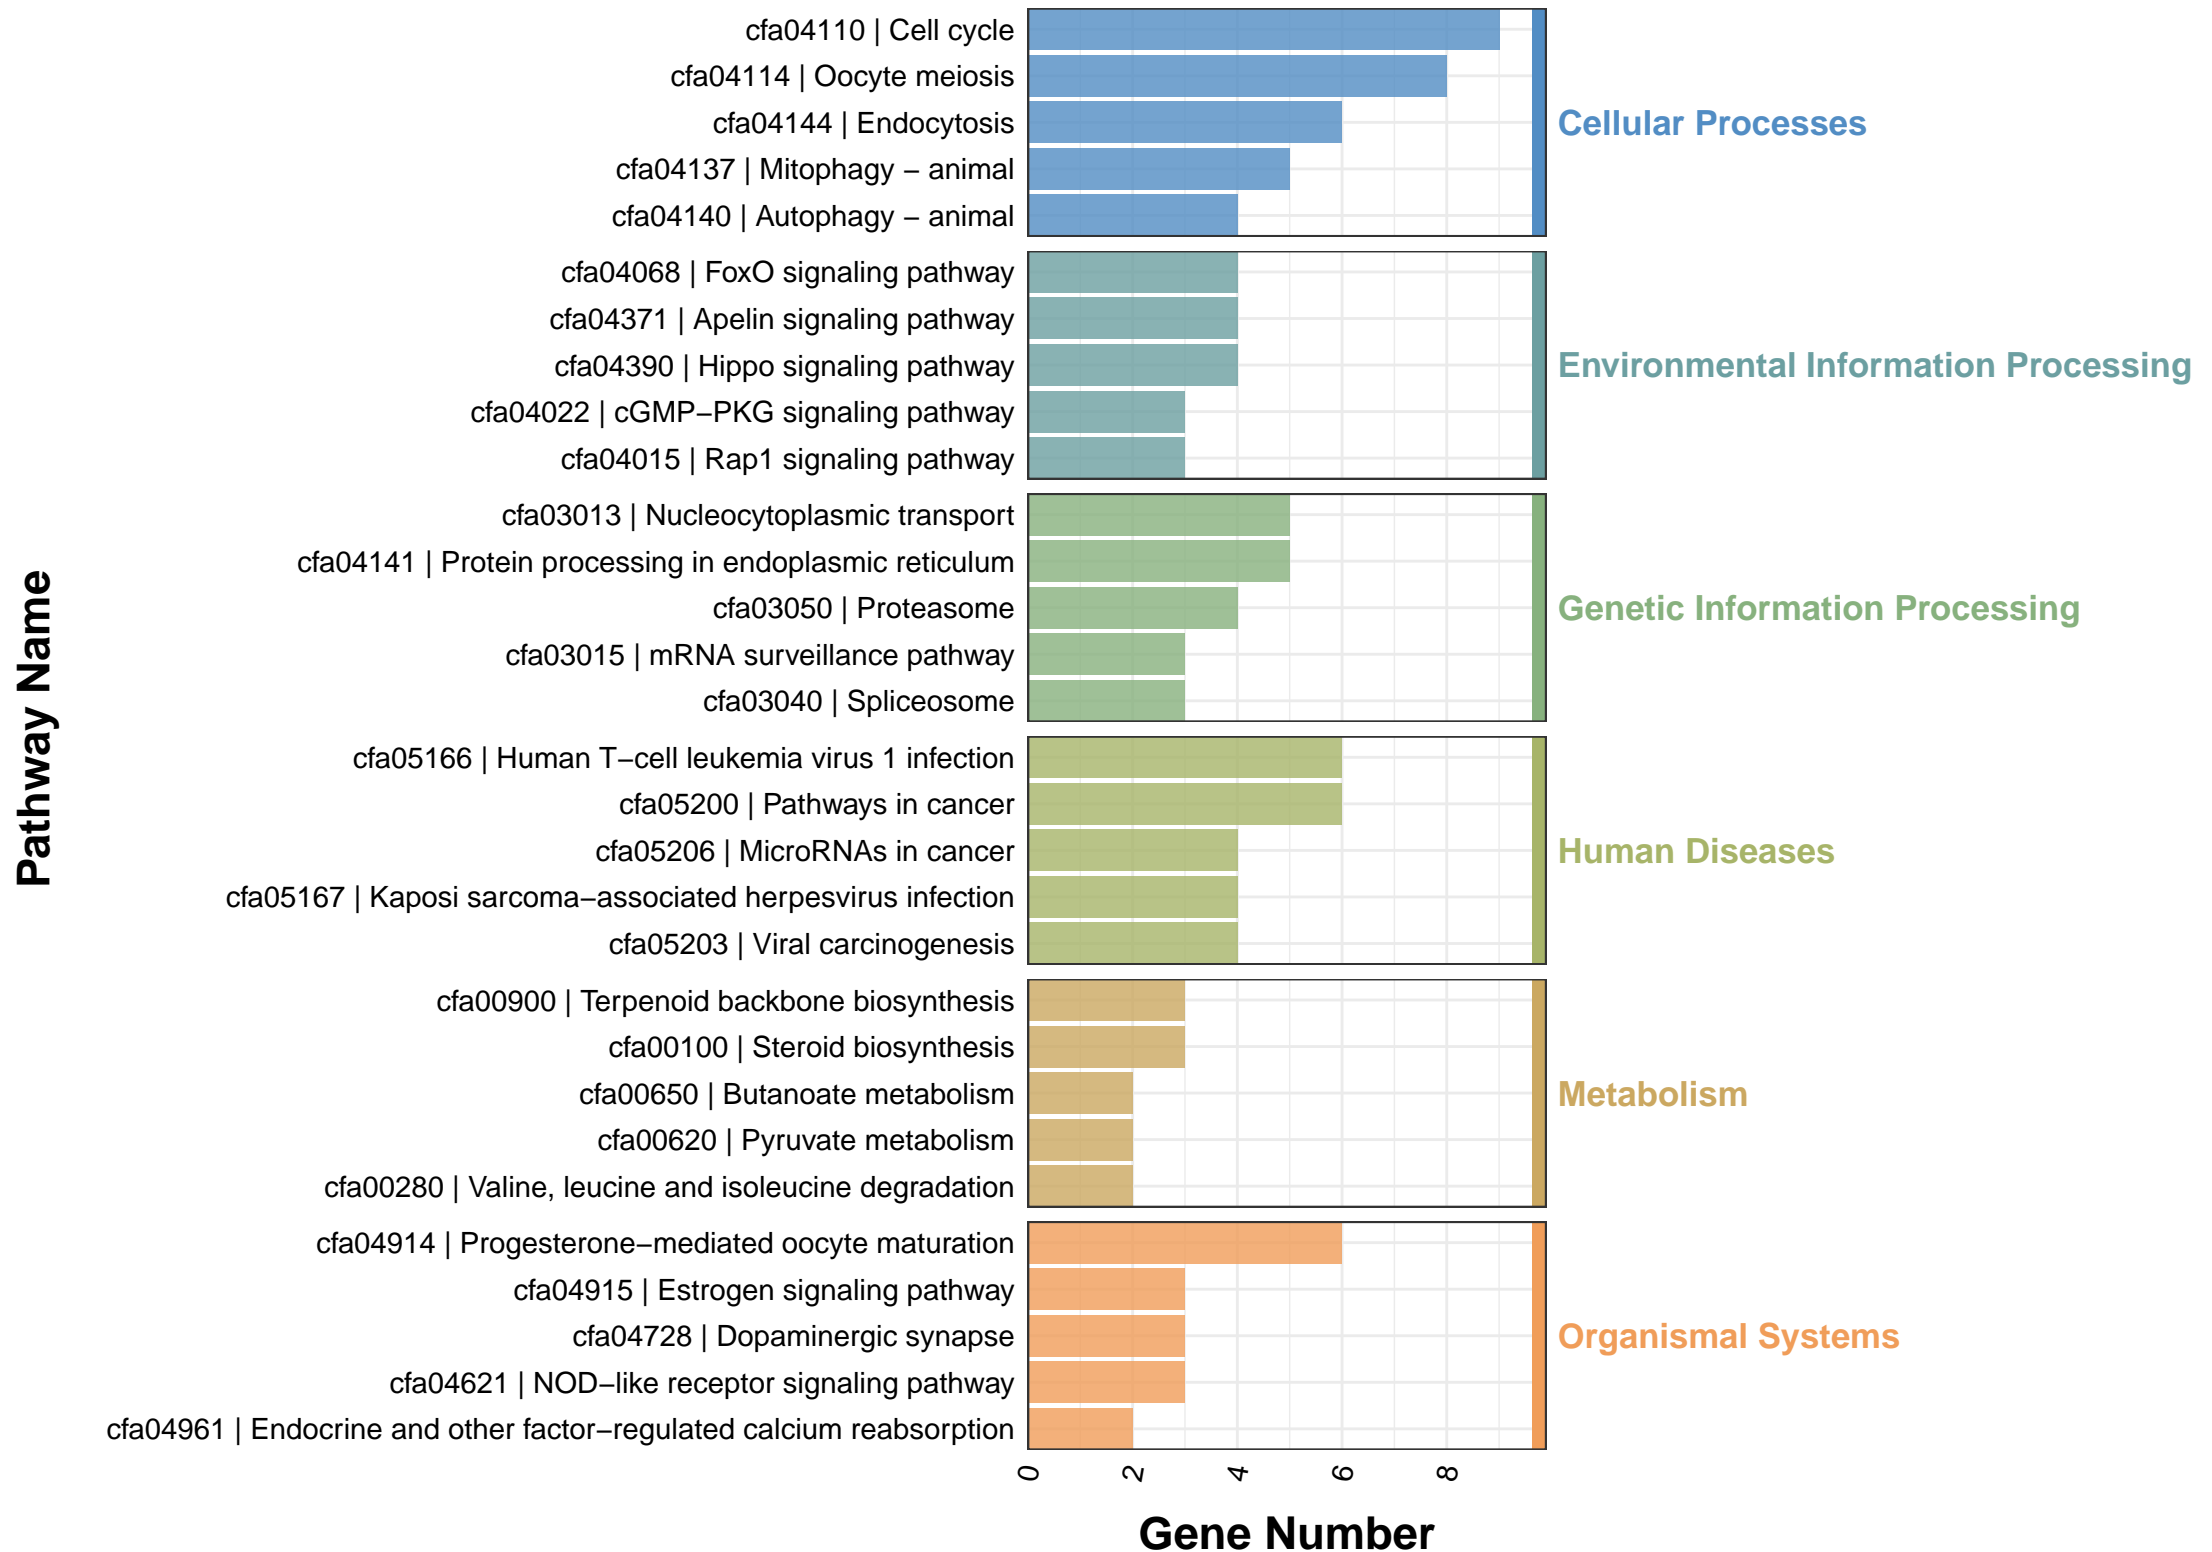

# KEGG Enrichment ScatterPlot

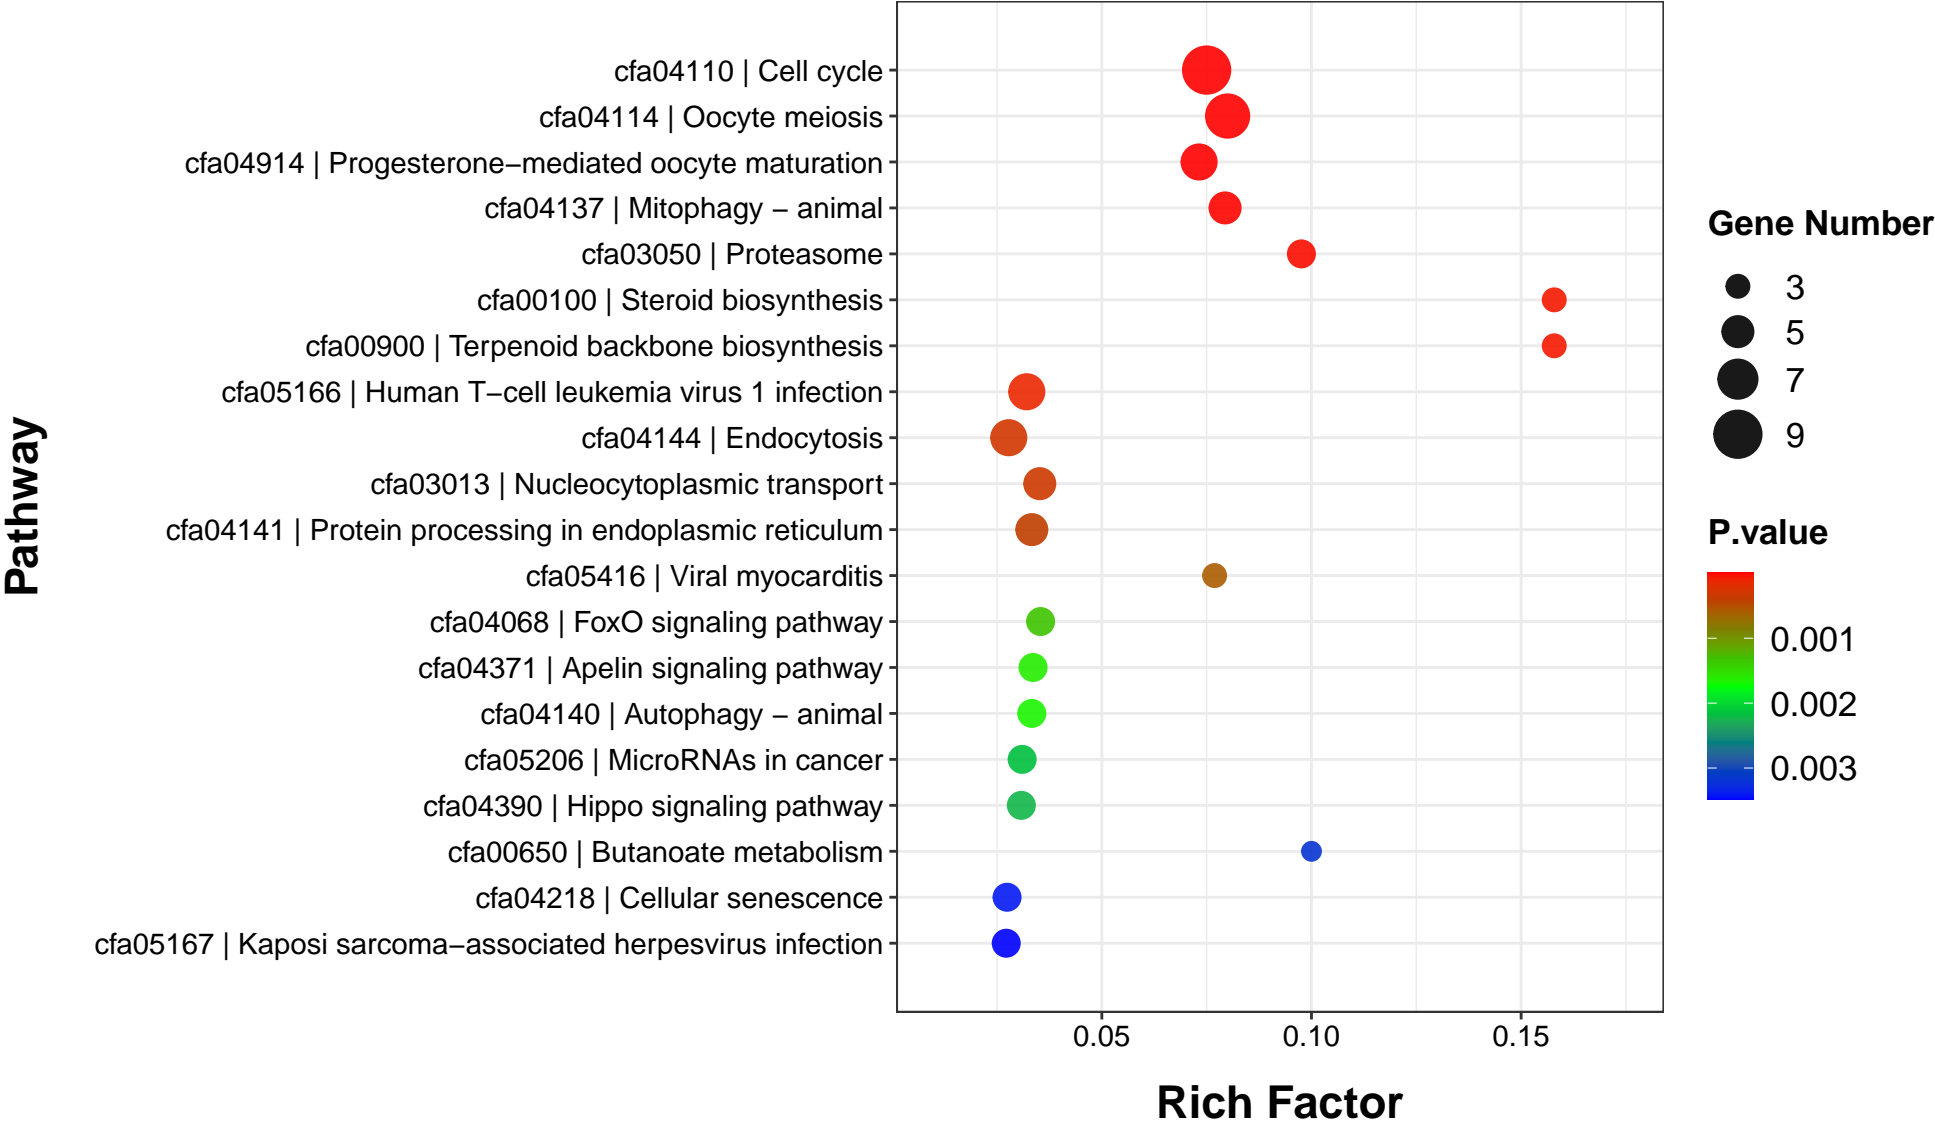



# GO Enrichment BarPlot

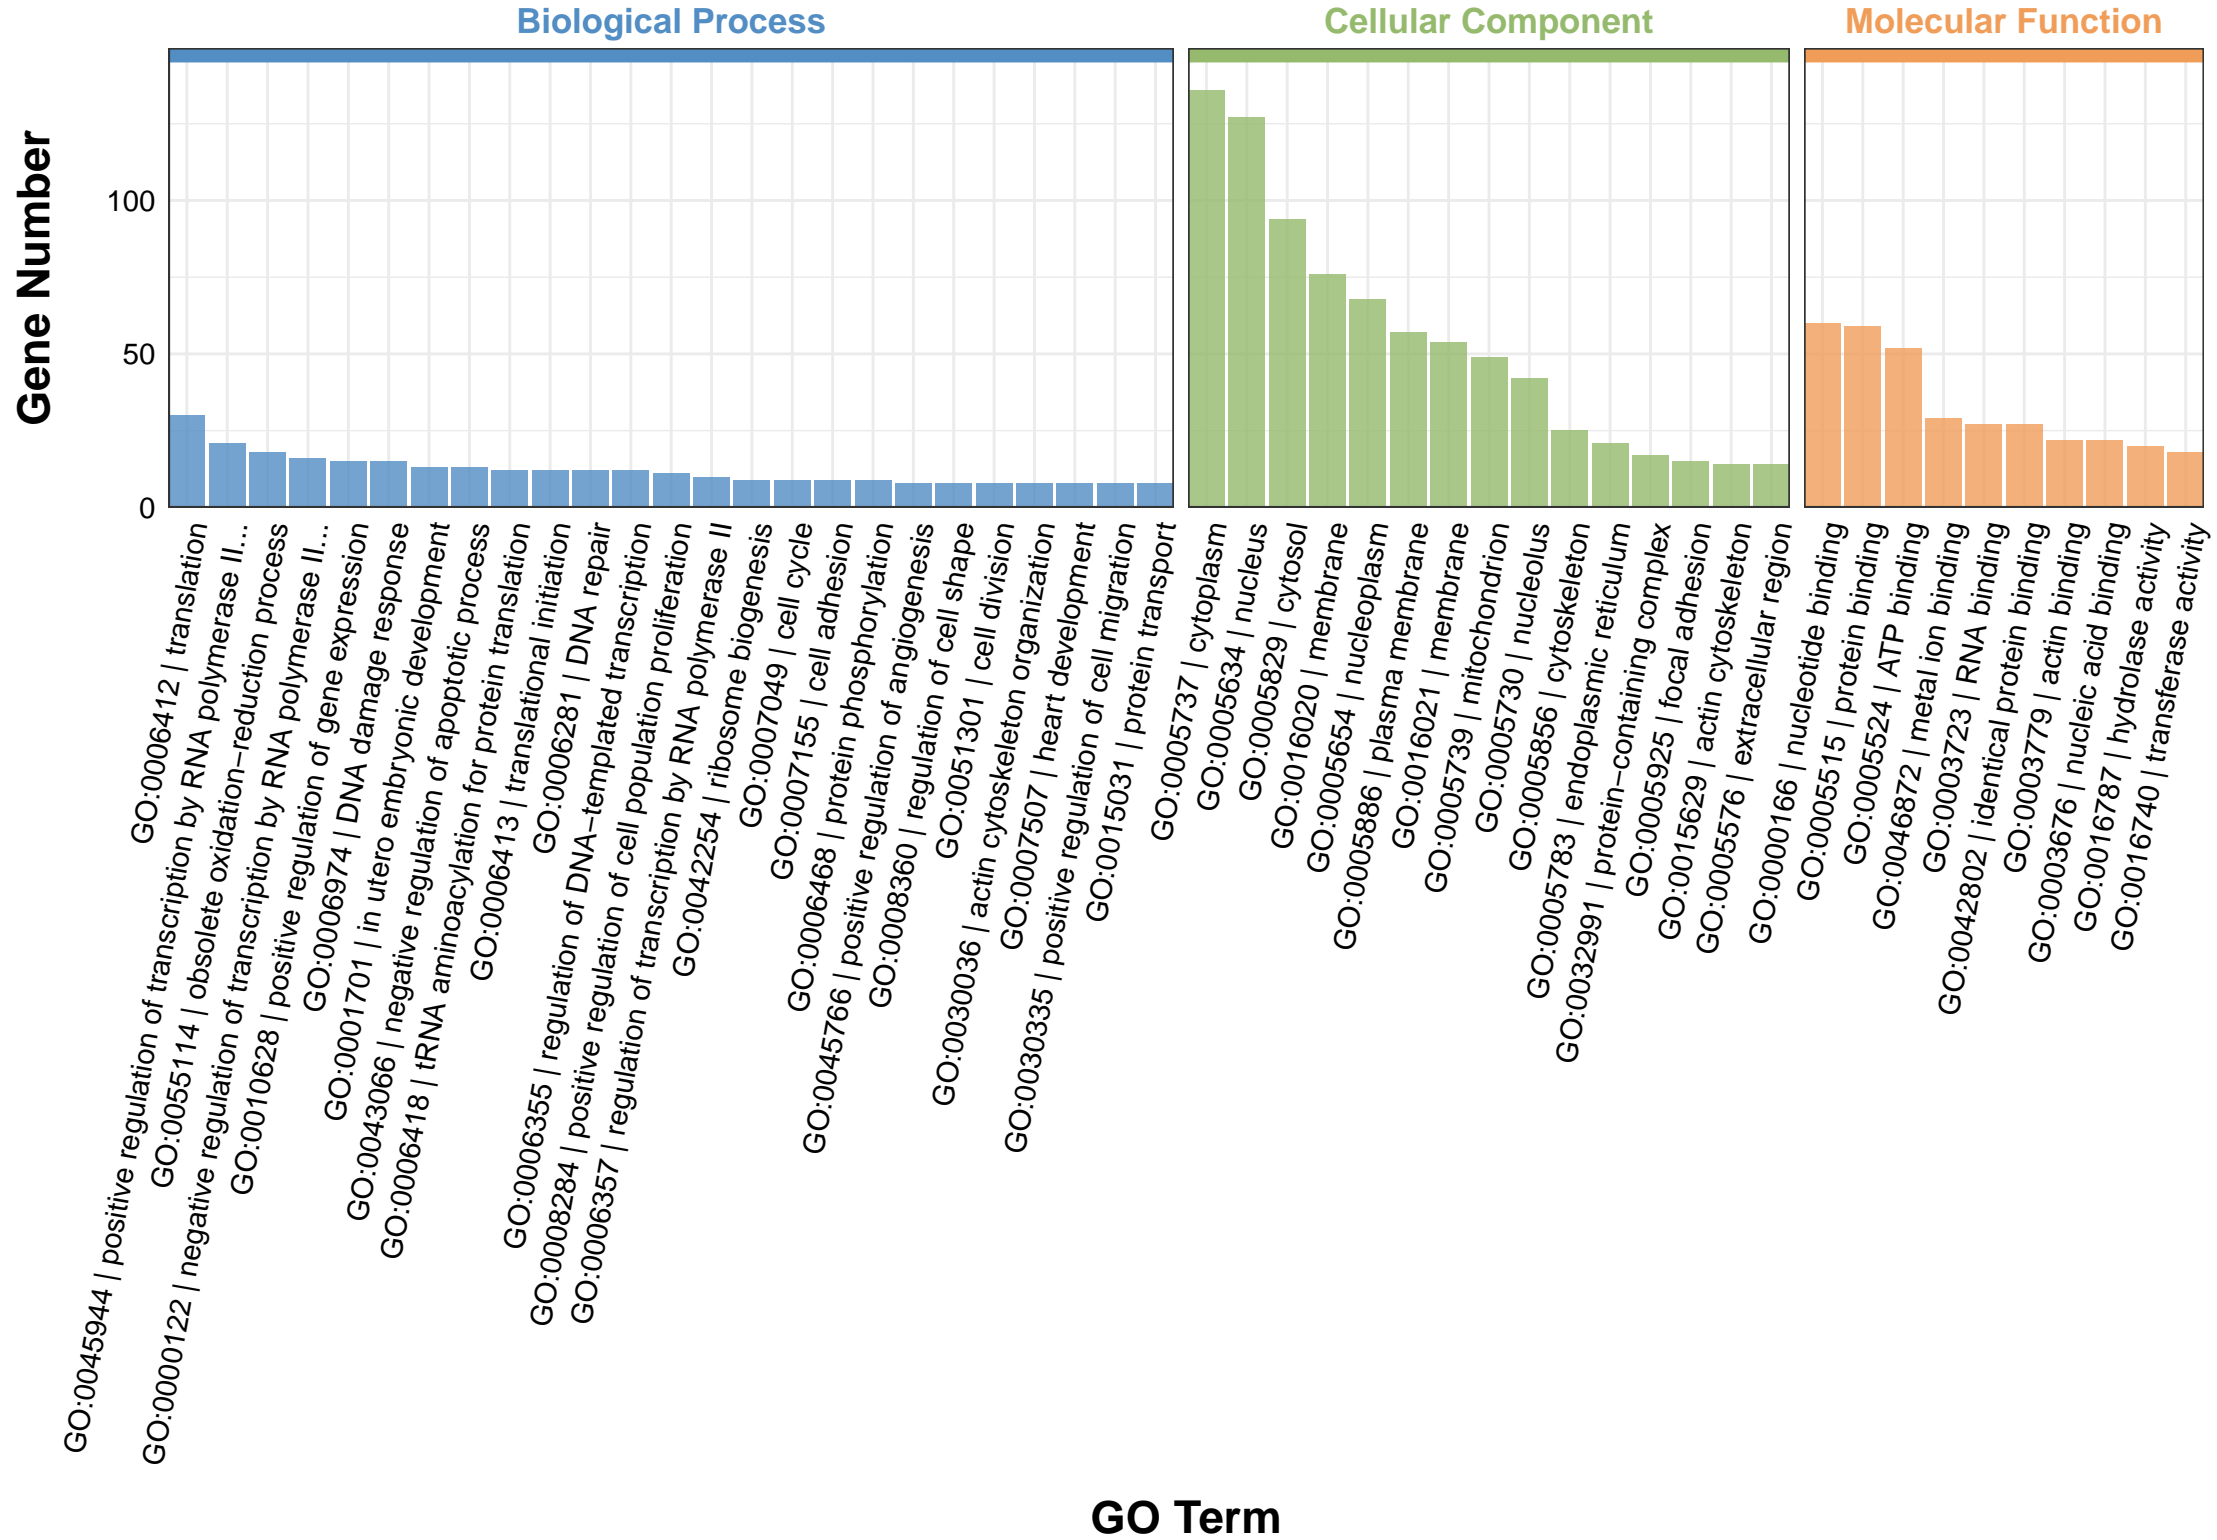

# GO Enrichment ScatterPlot

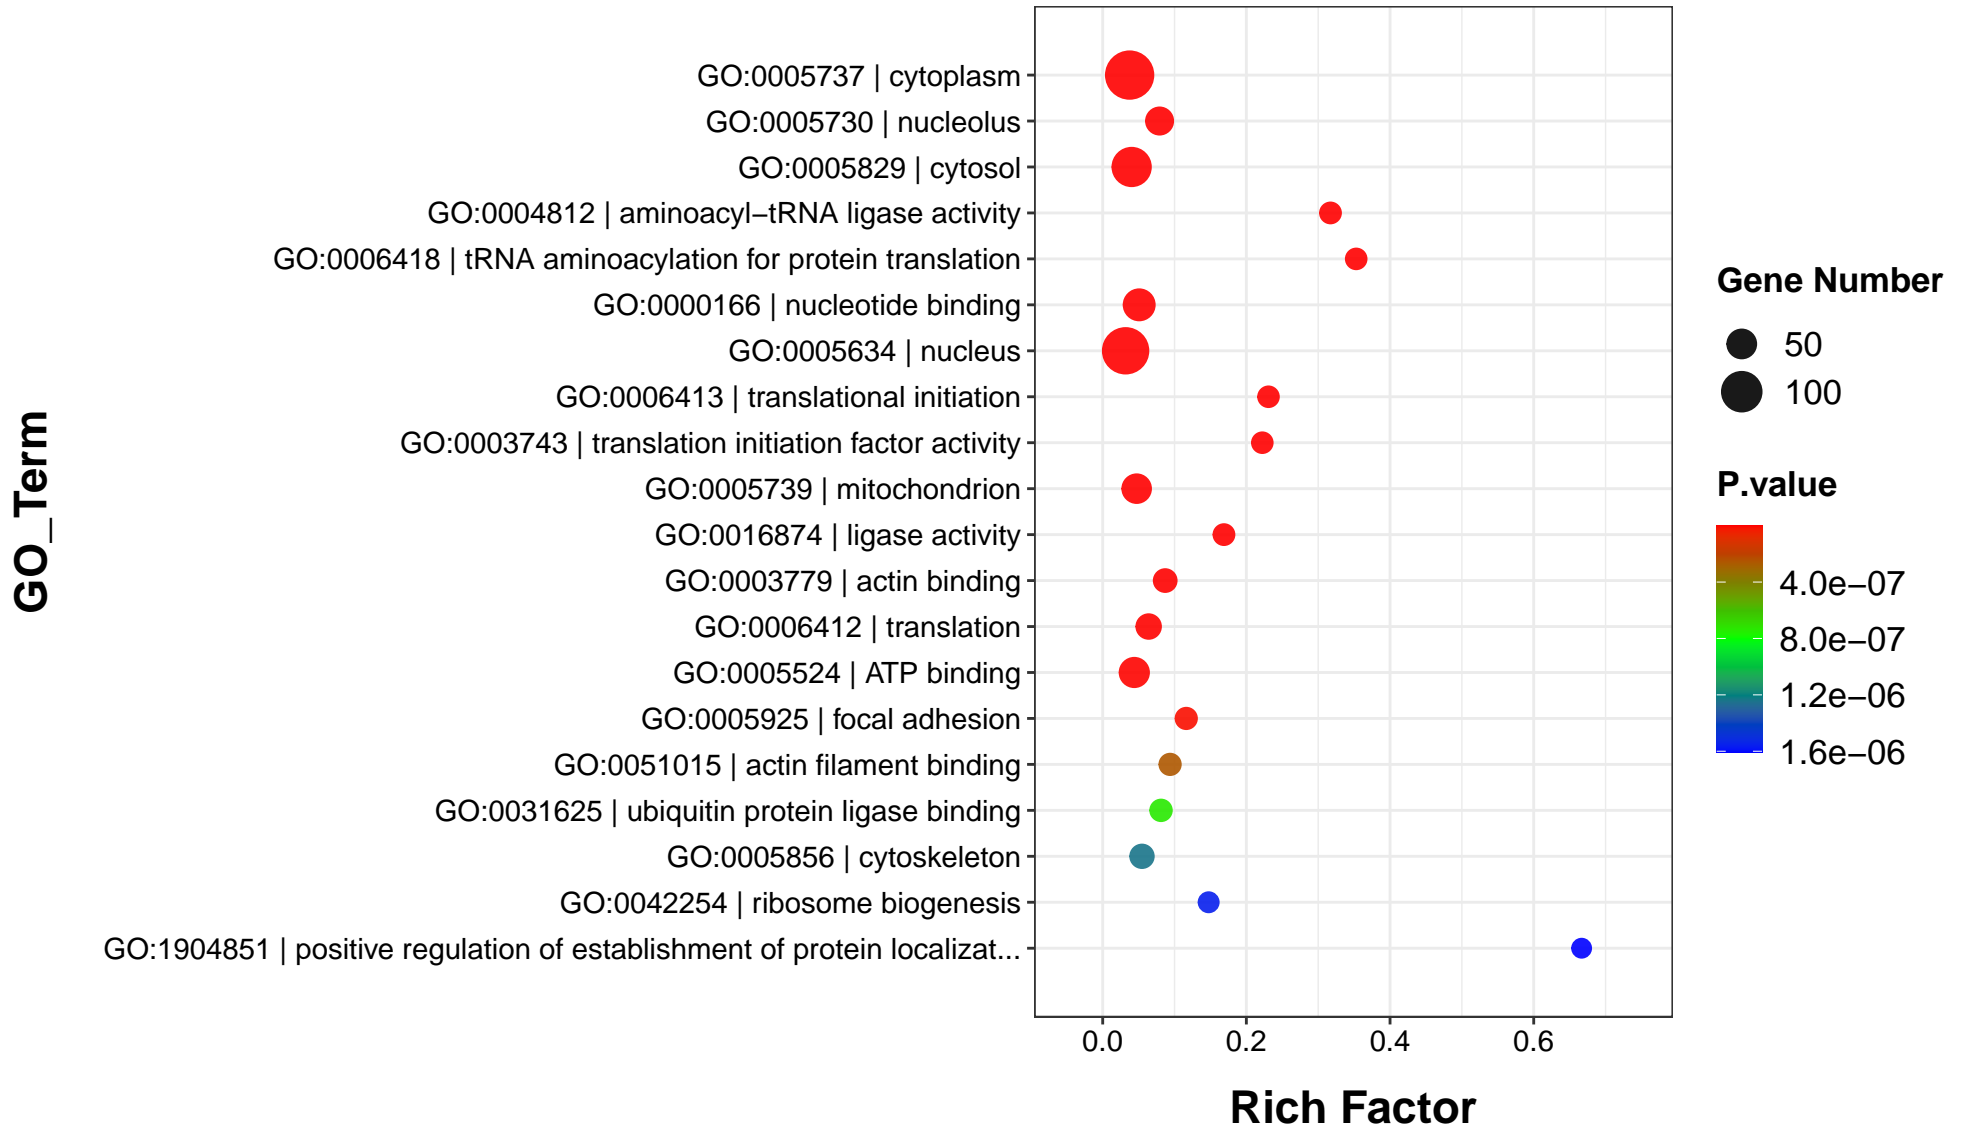

# KEGG Enrichment BarPlot

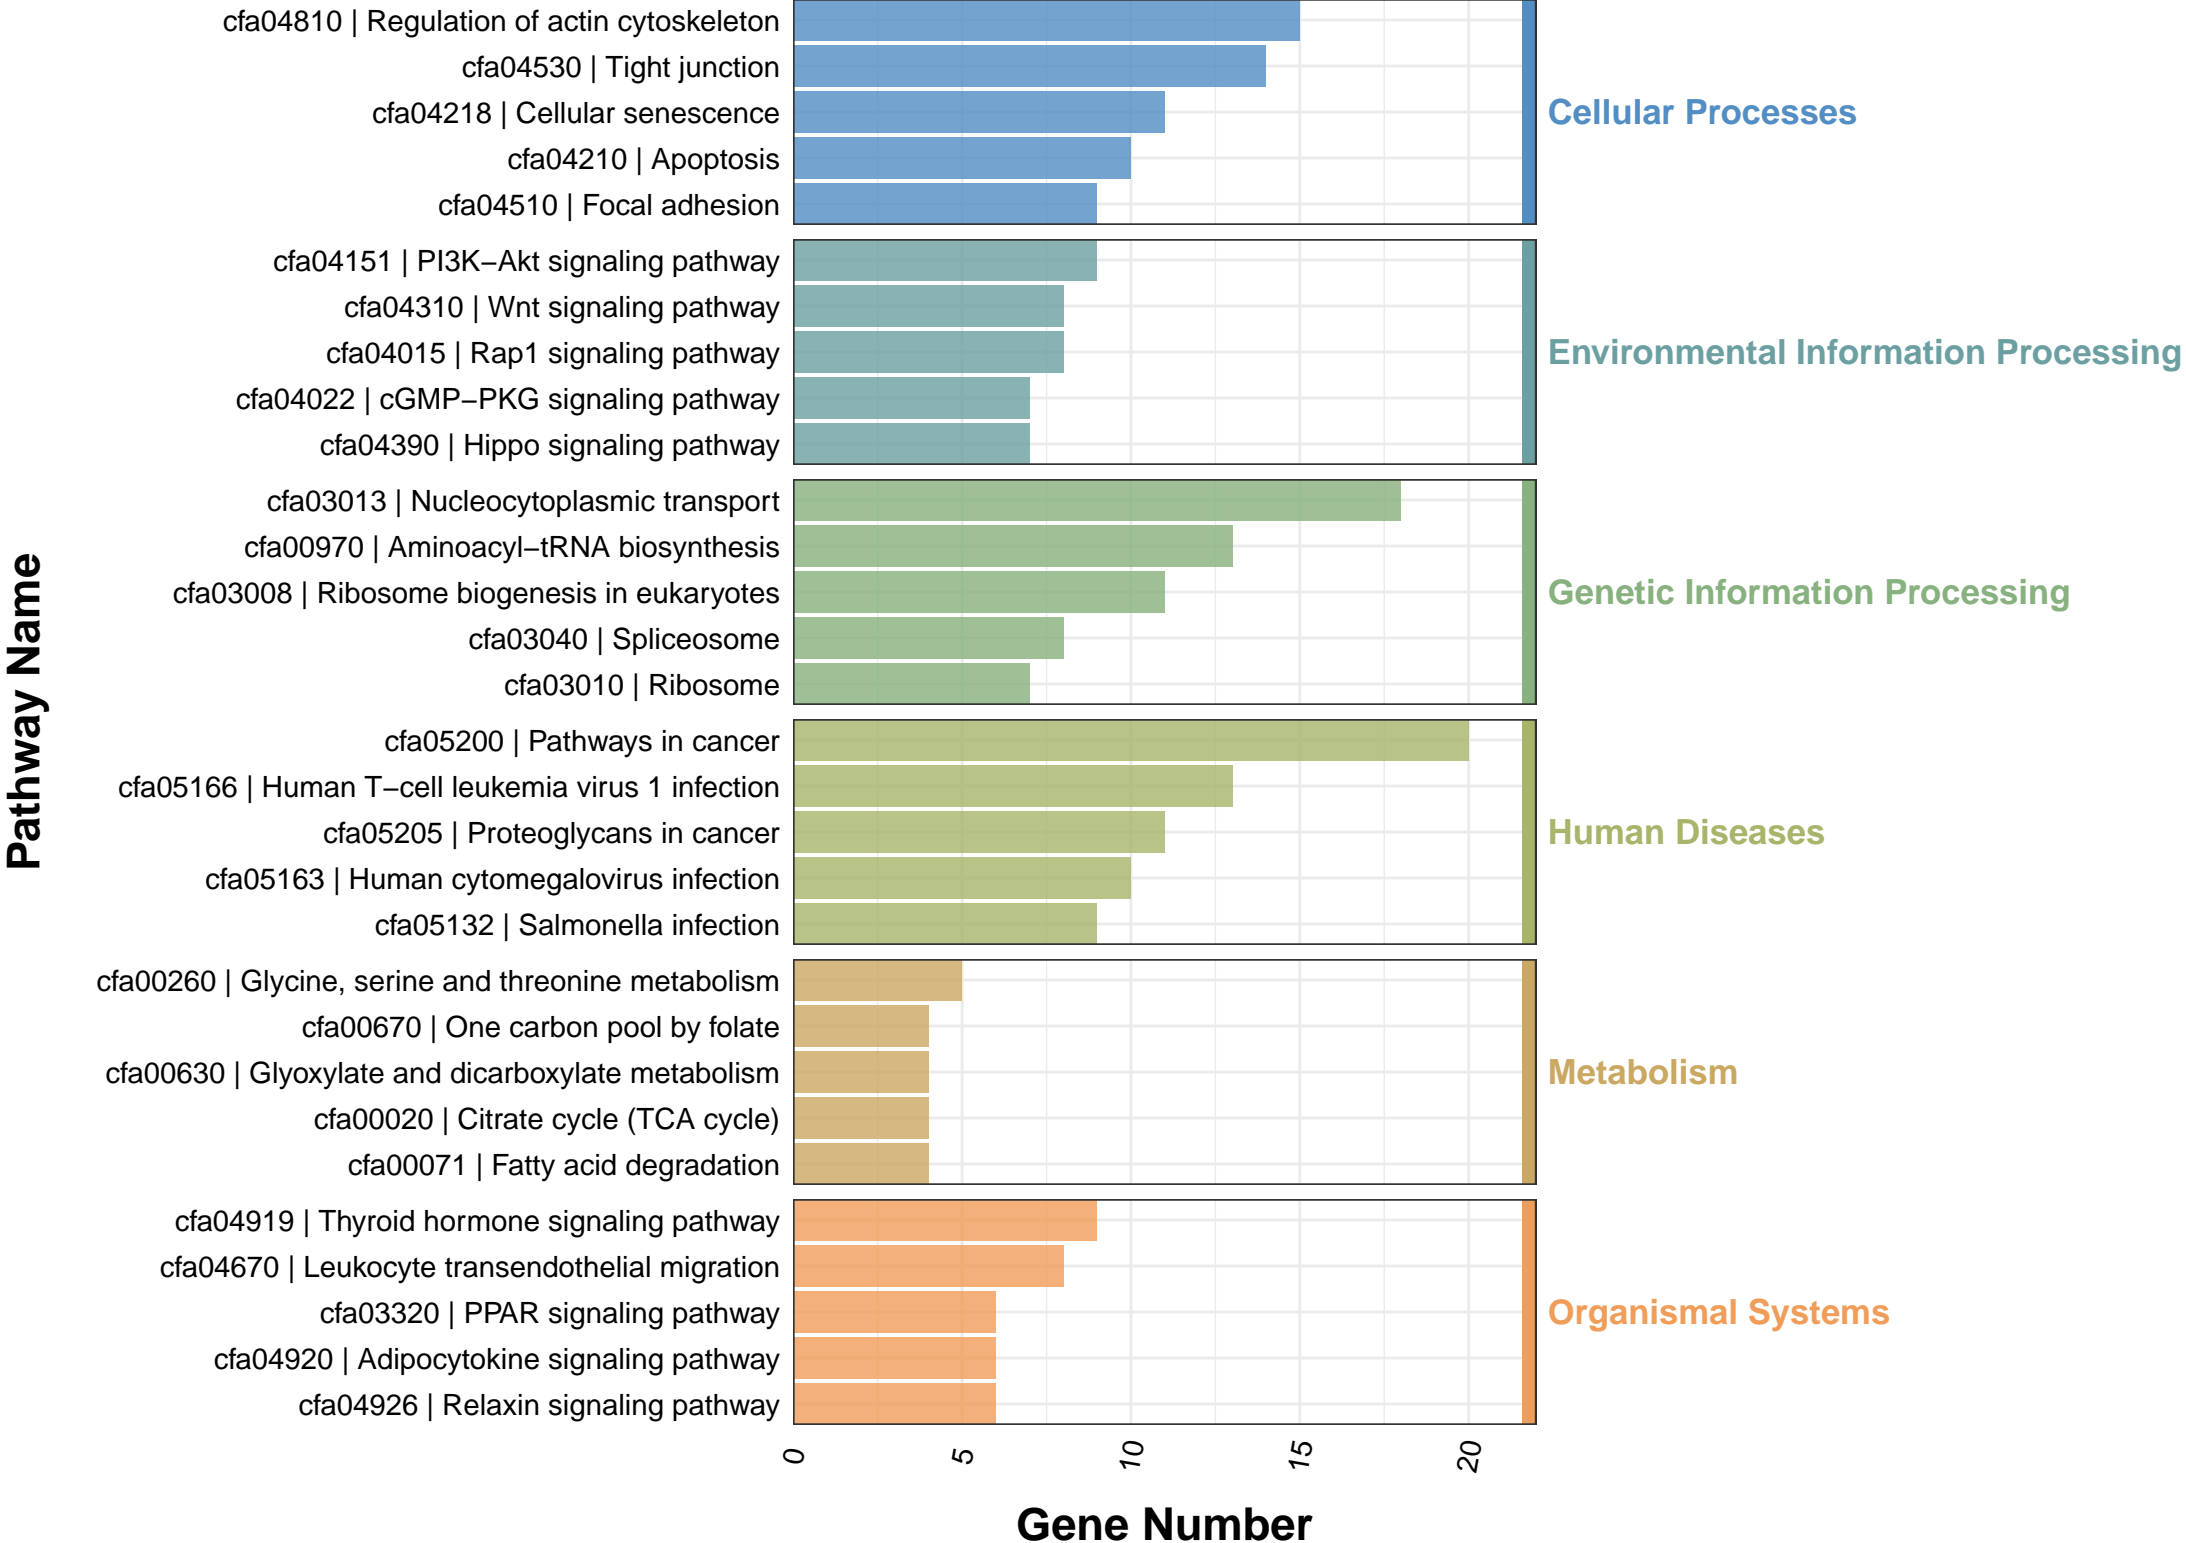

# KEGG Enrichment ScatterPlot

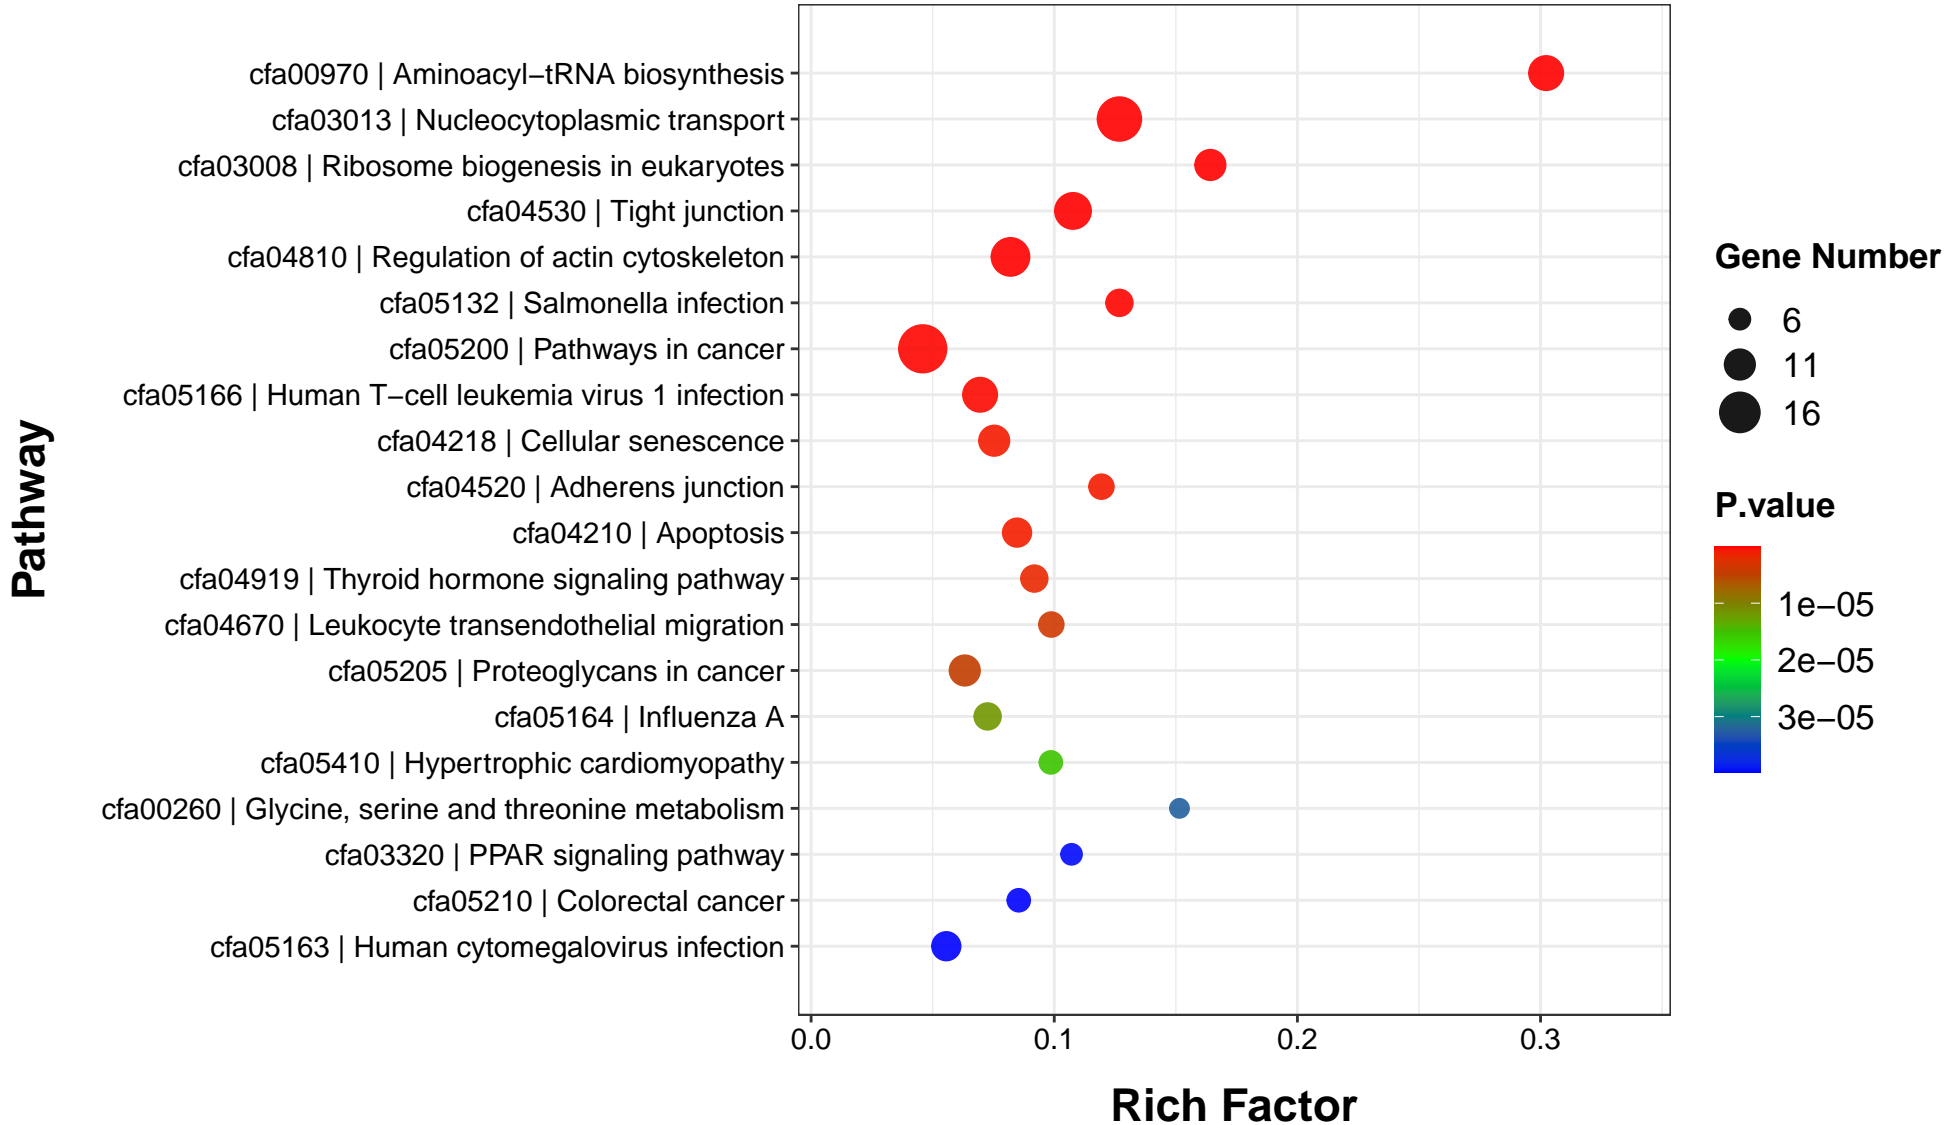

# GO Enrichment BarPlot

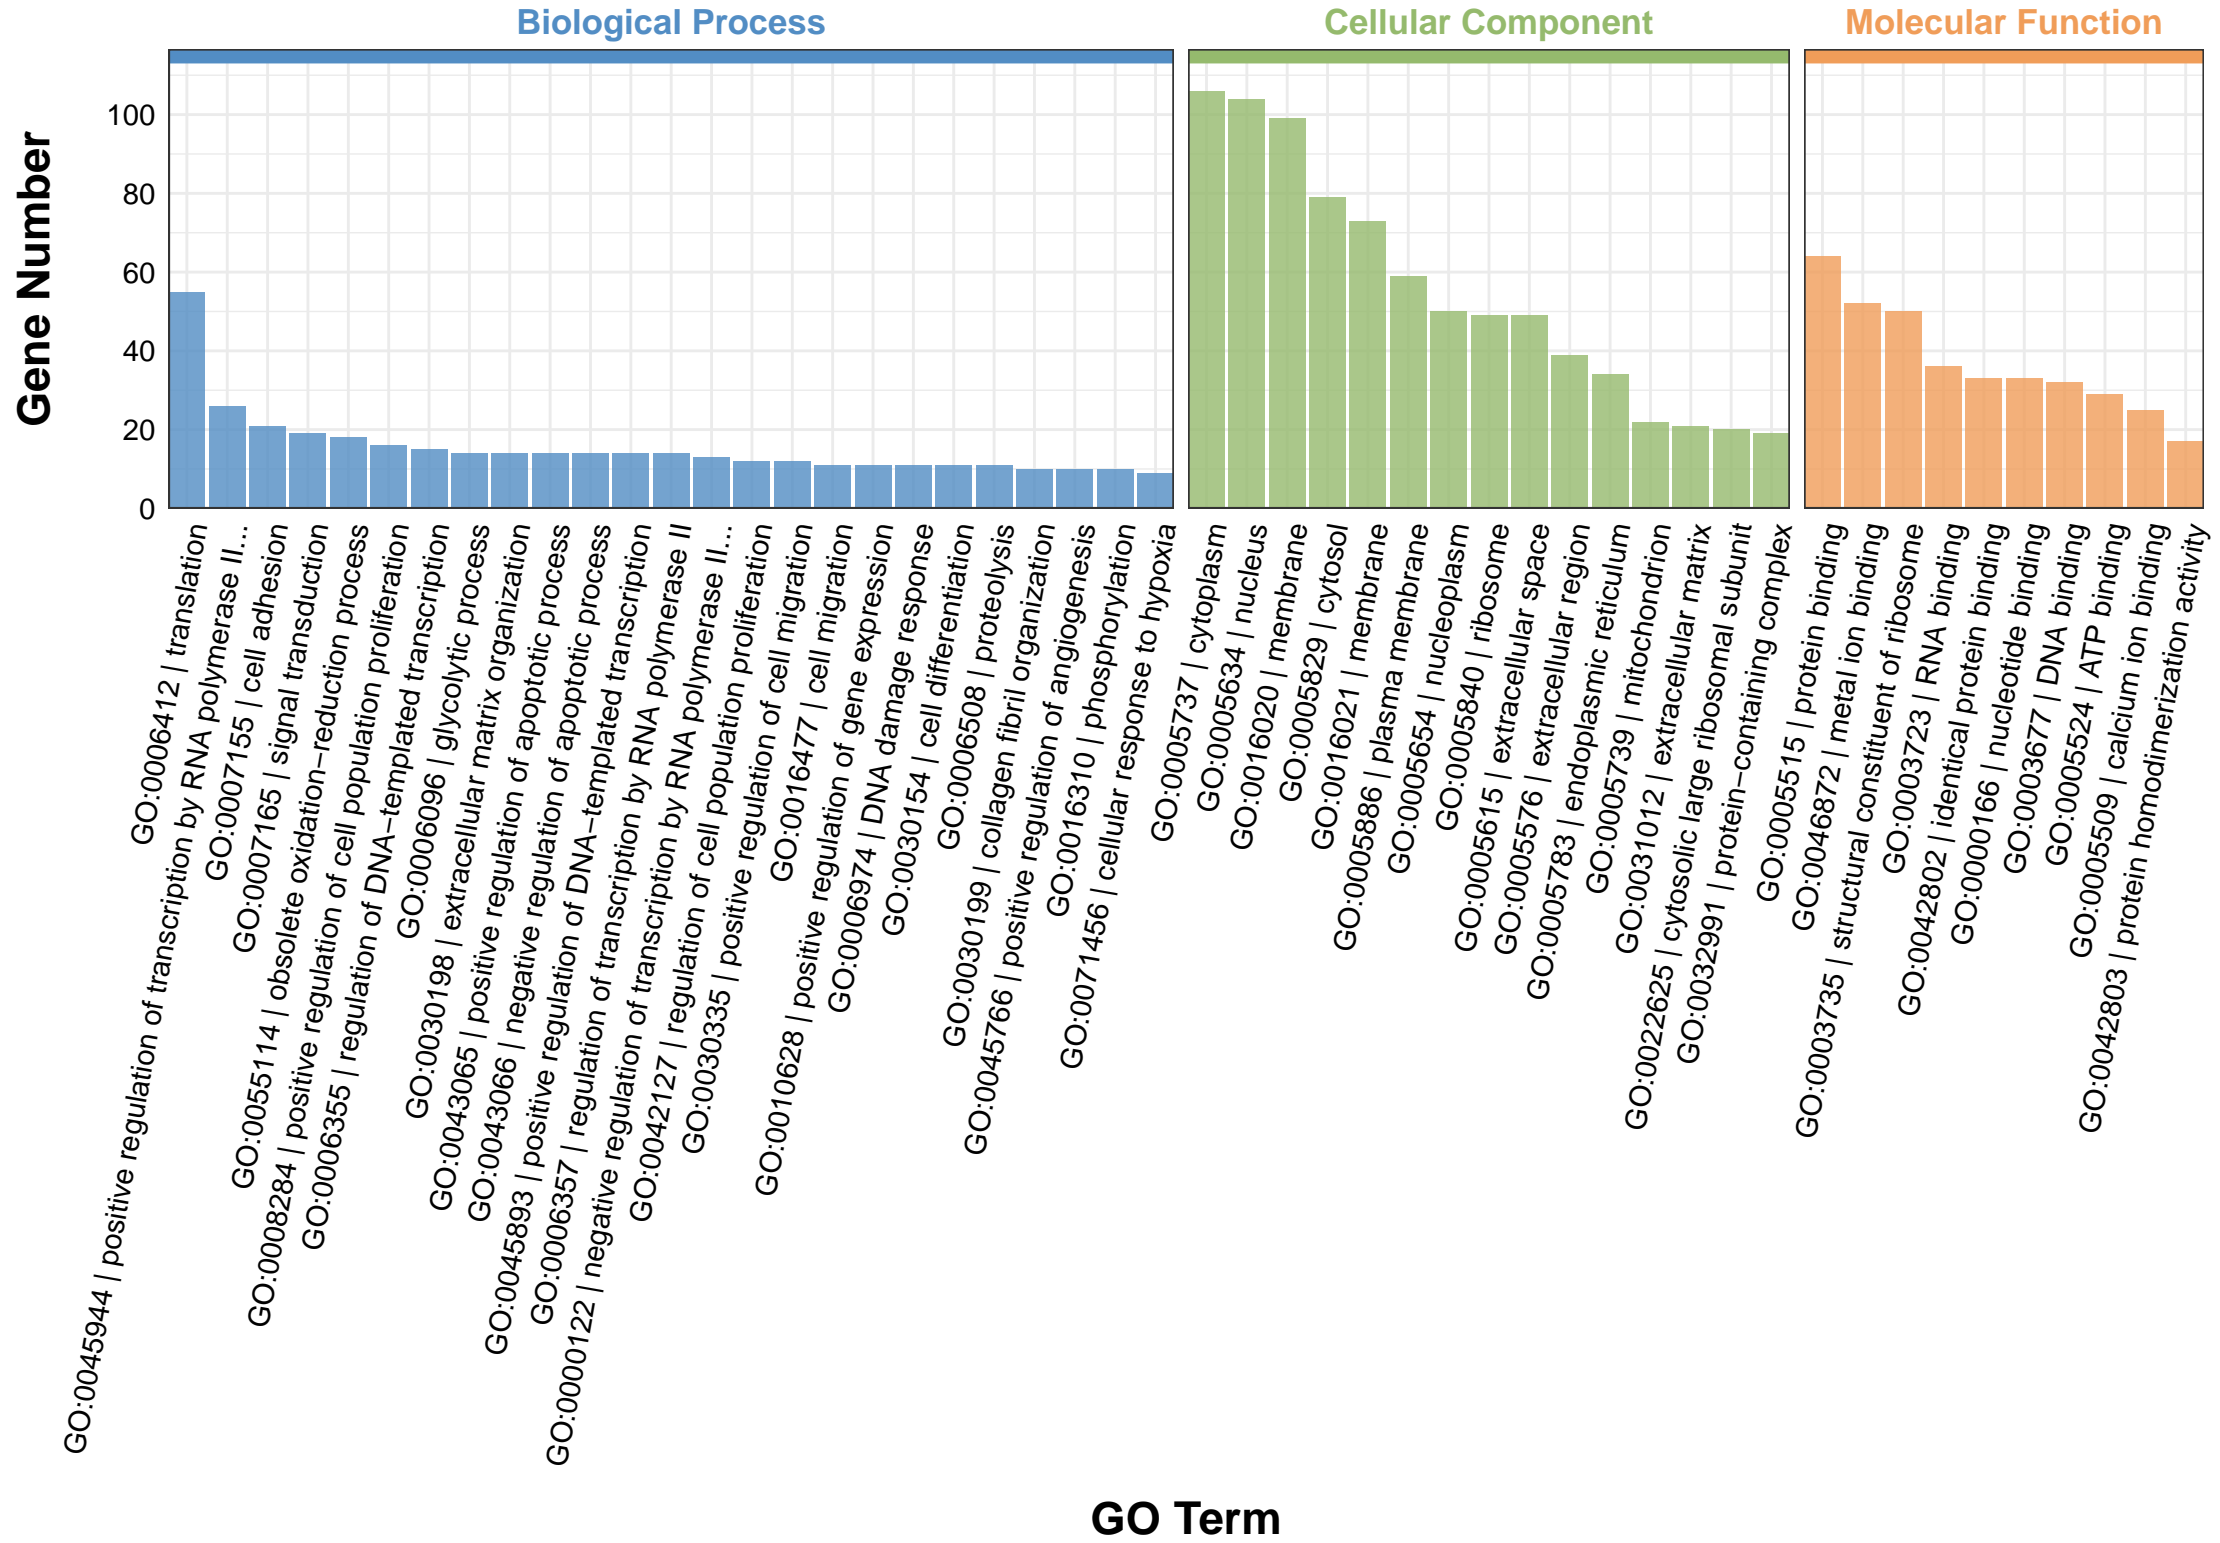

# GO Enrichment ScatterPlot

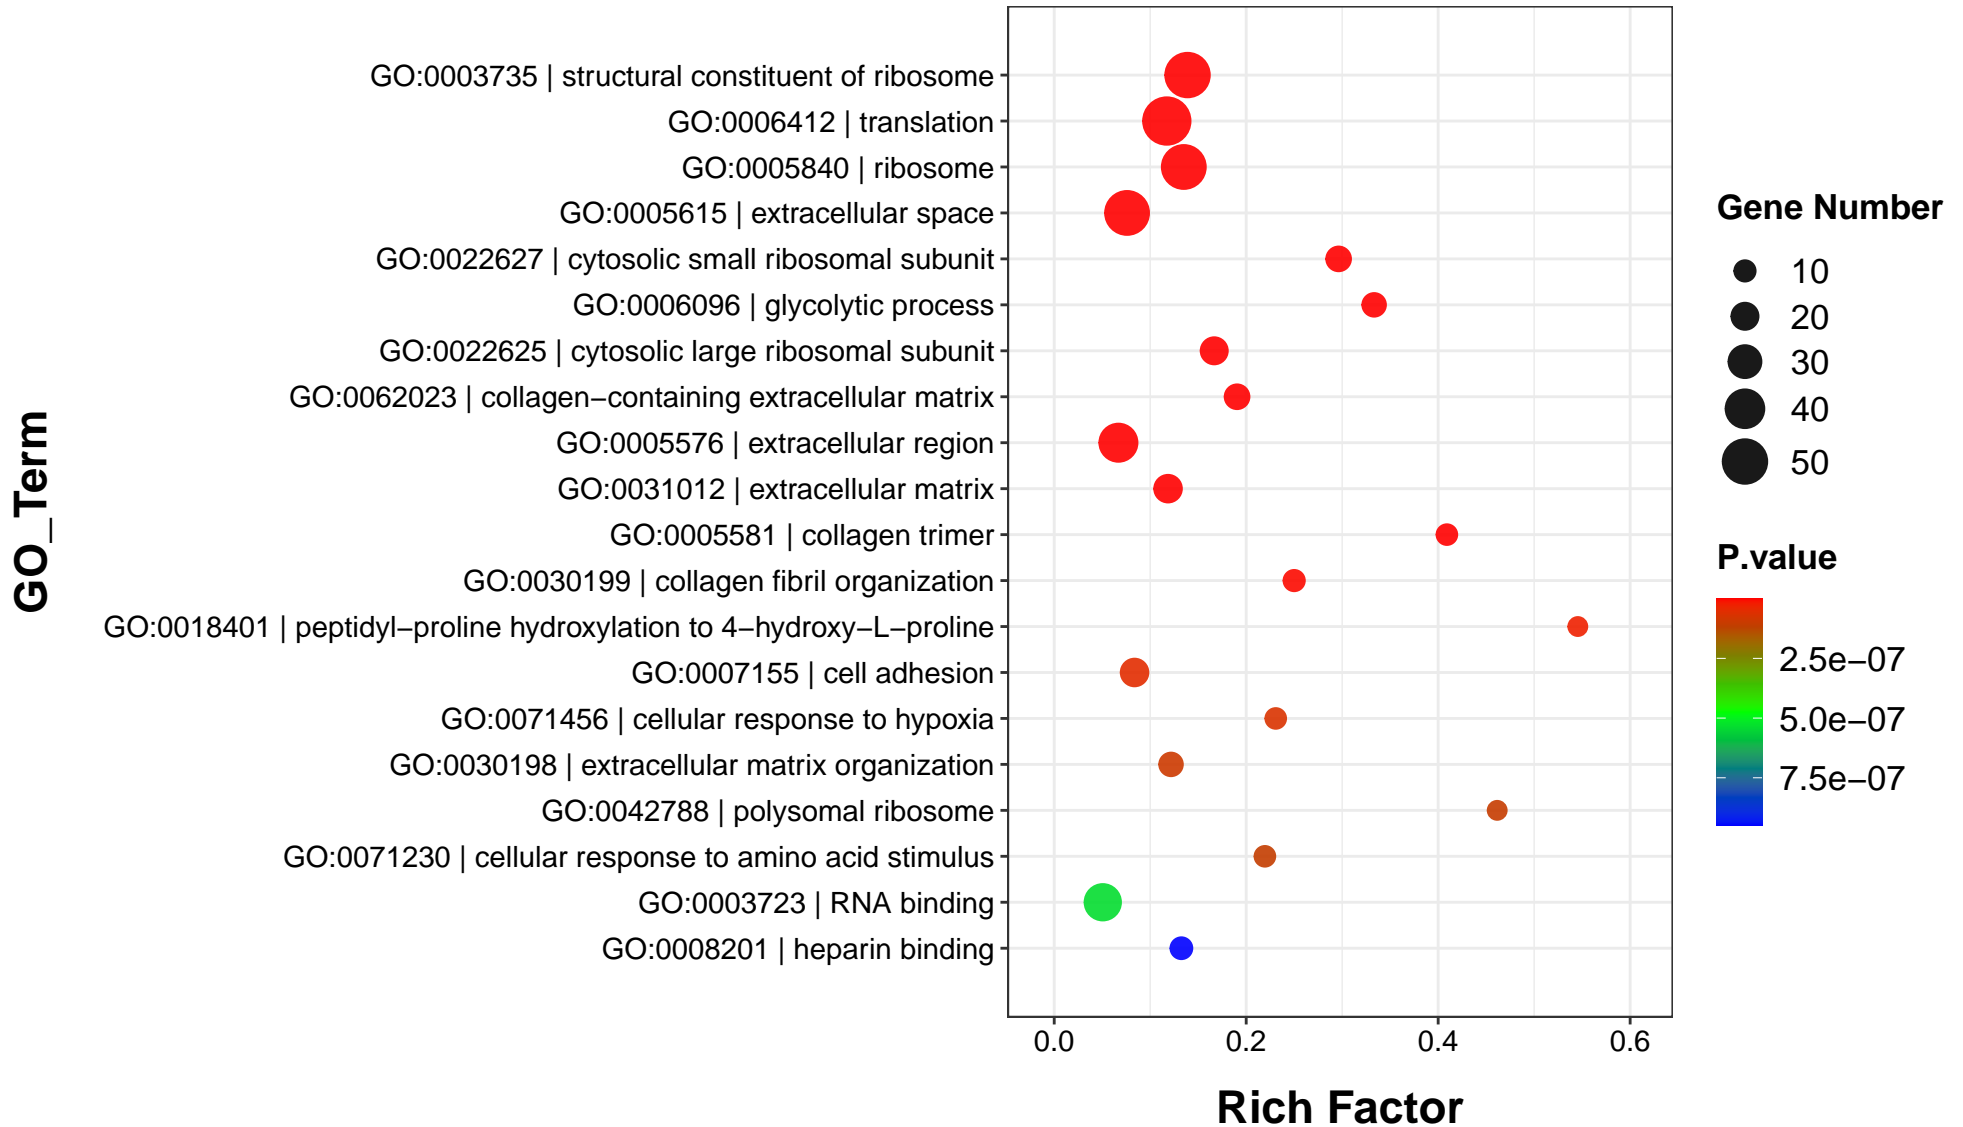

# KEGG Enrichment BarPlot

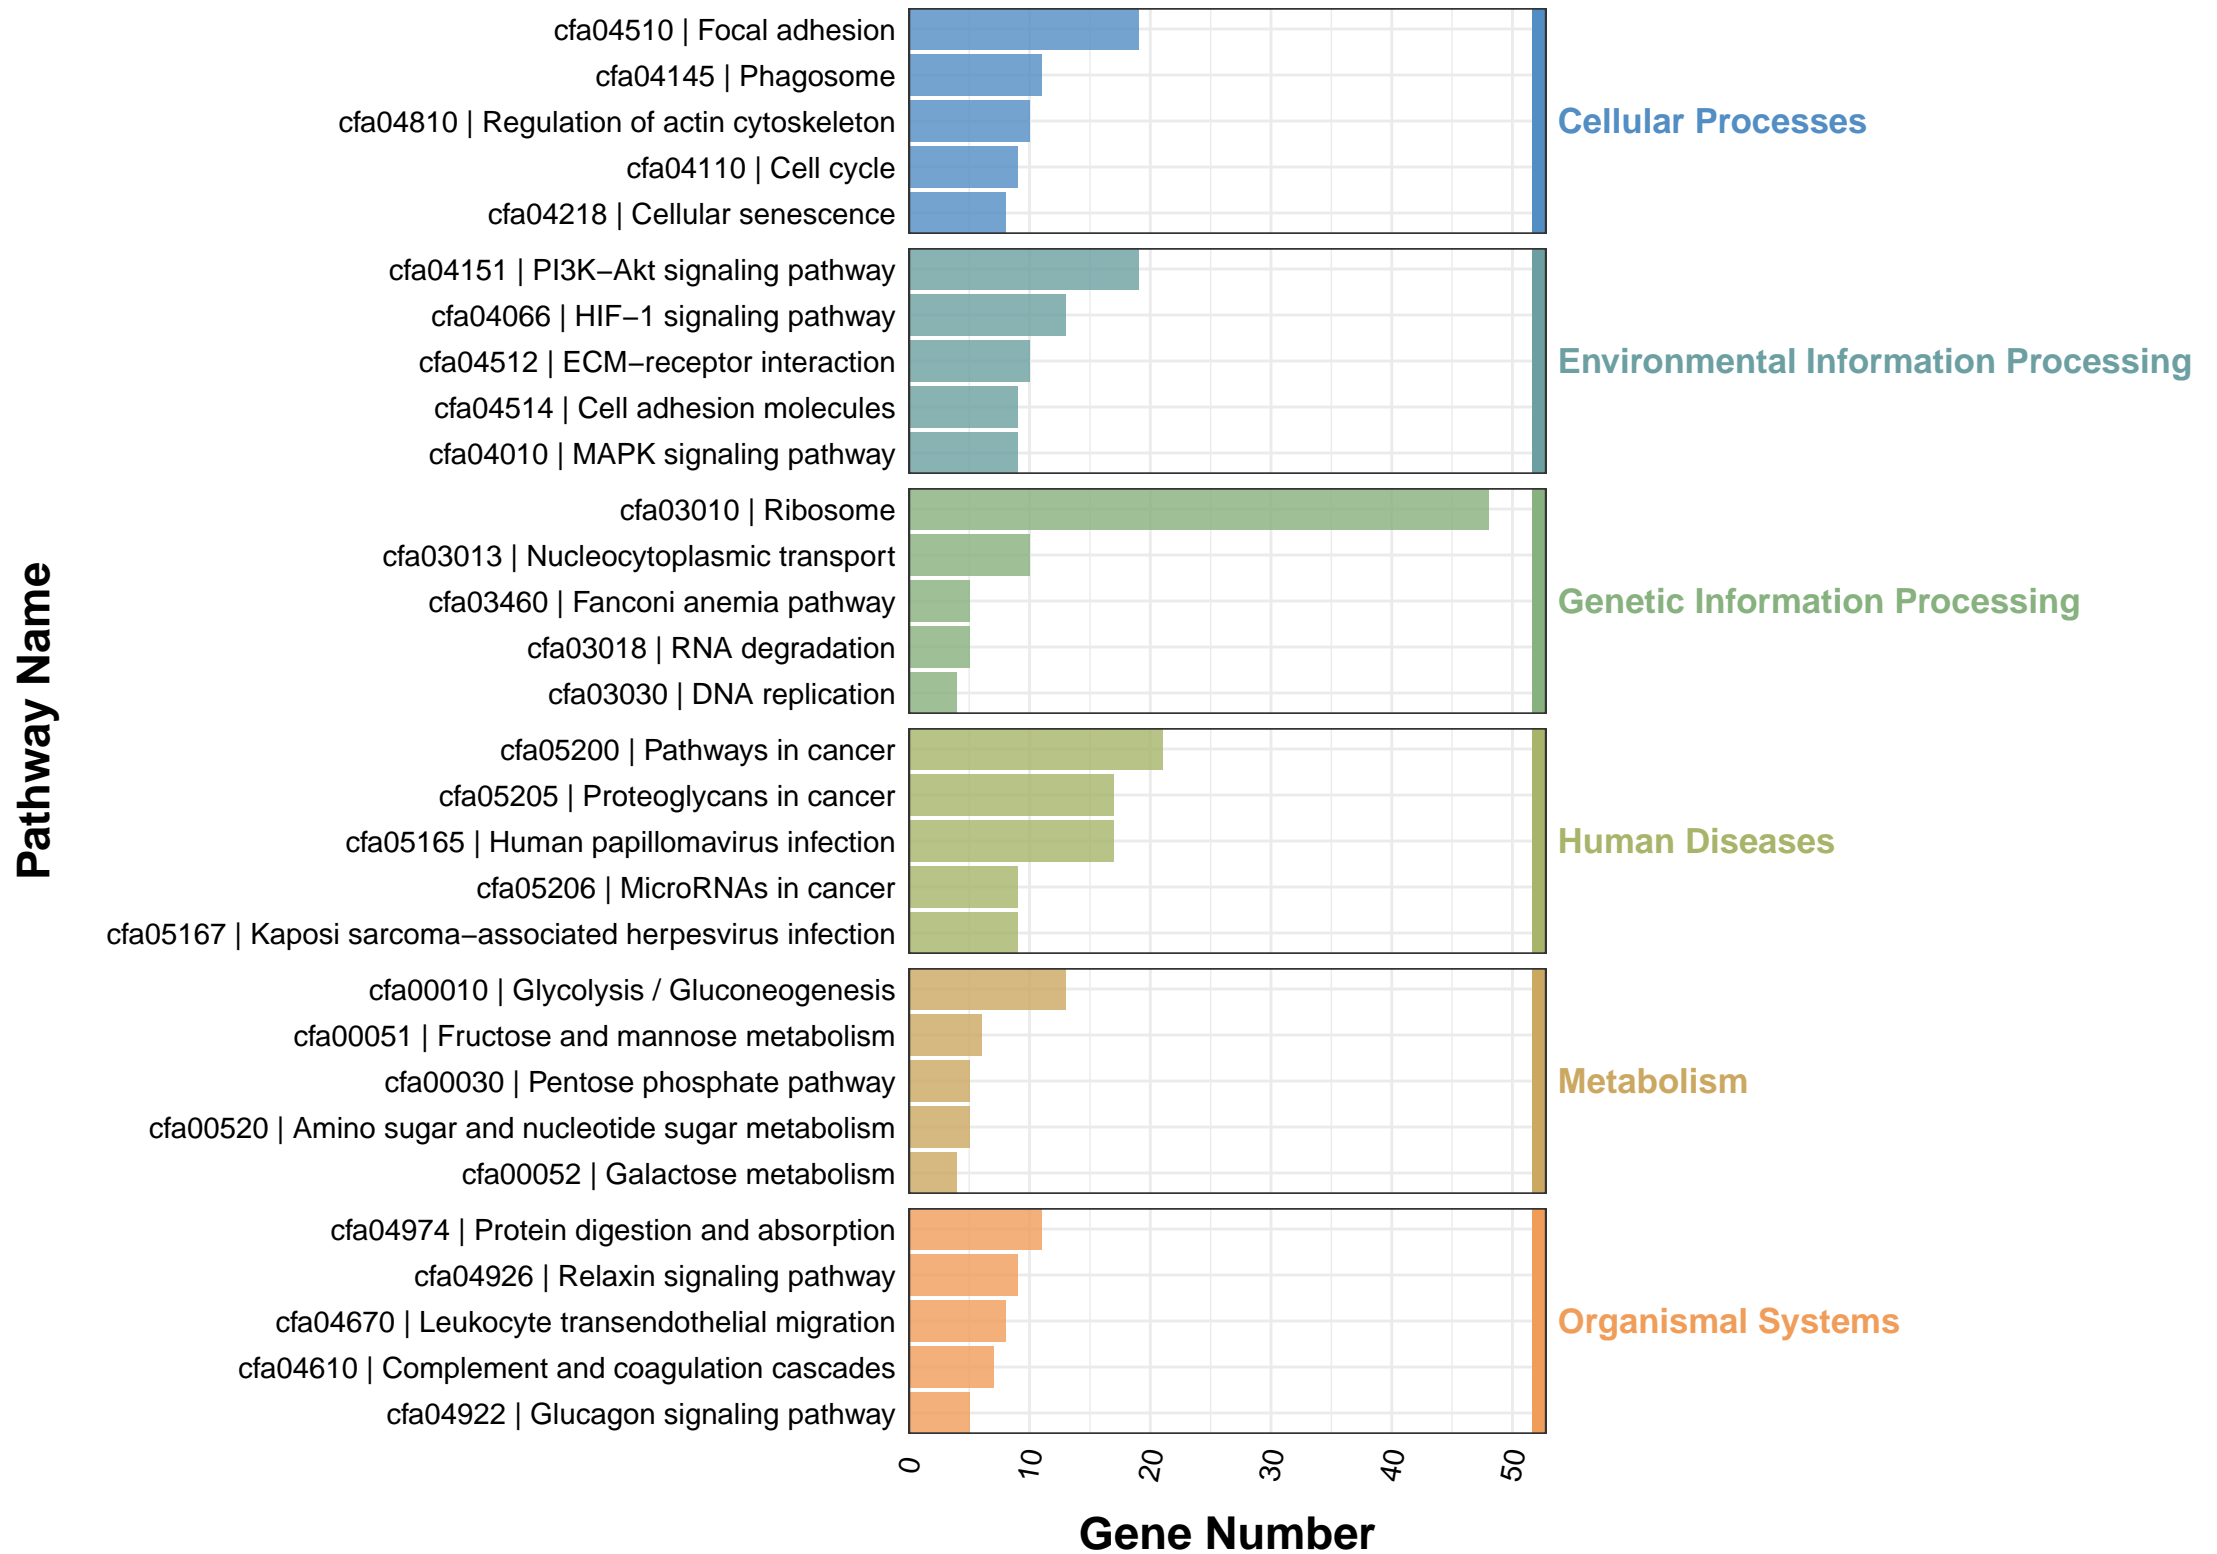

# KEGG Enrichment ScatterPlot

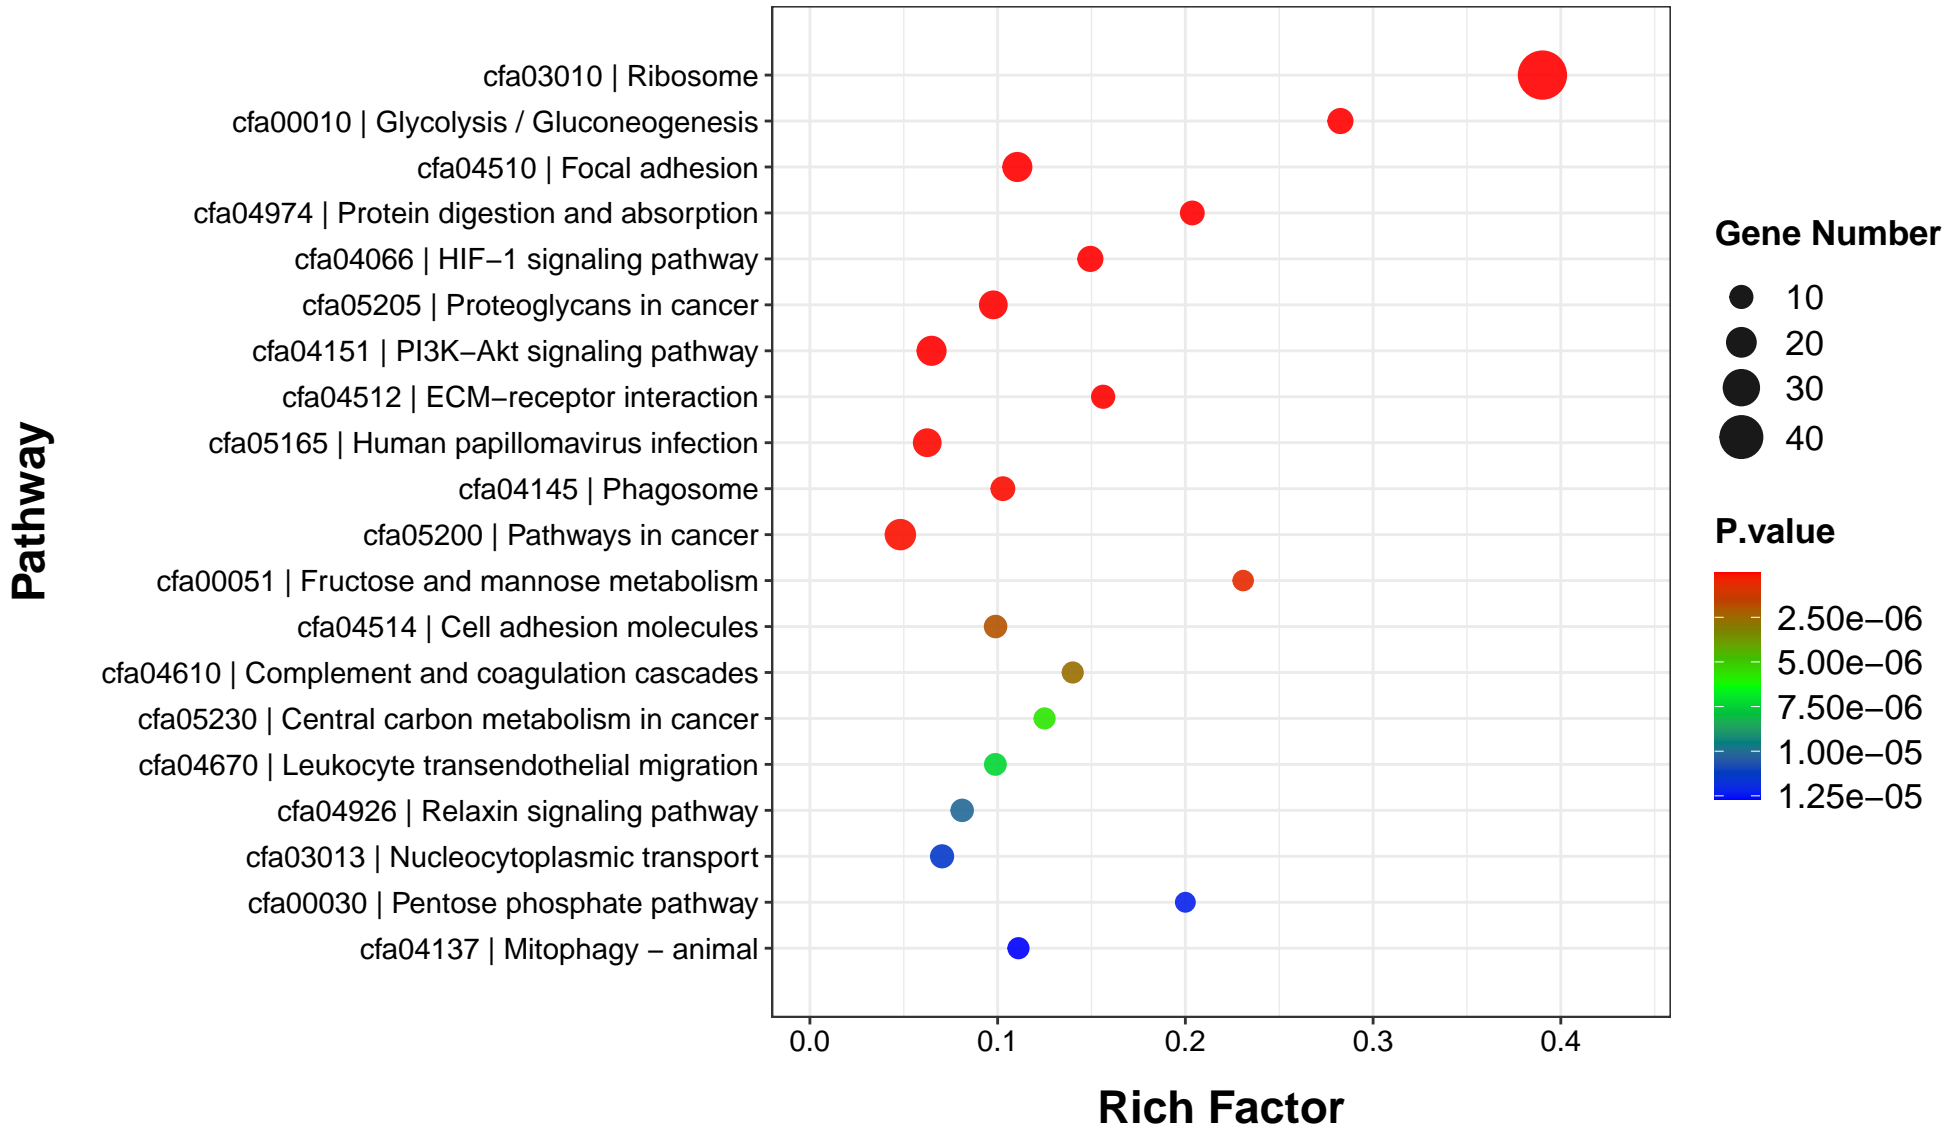



# GO Enrichment BarPlot

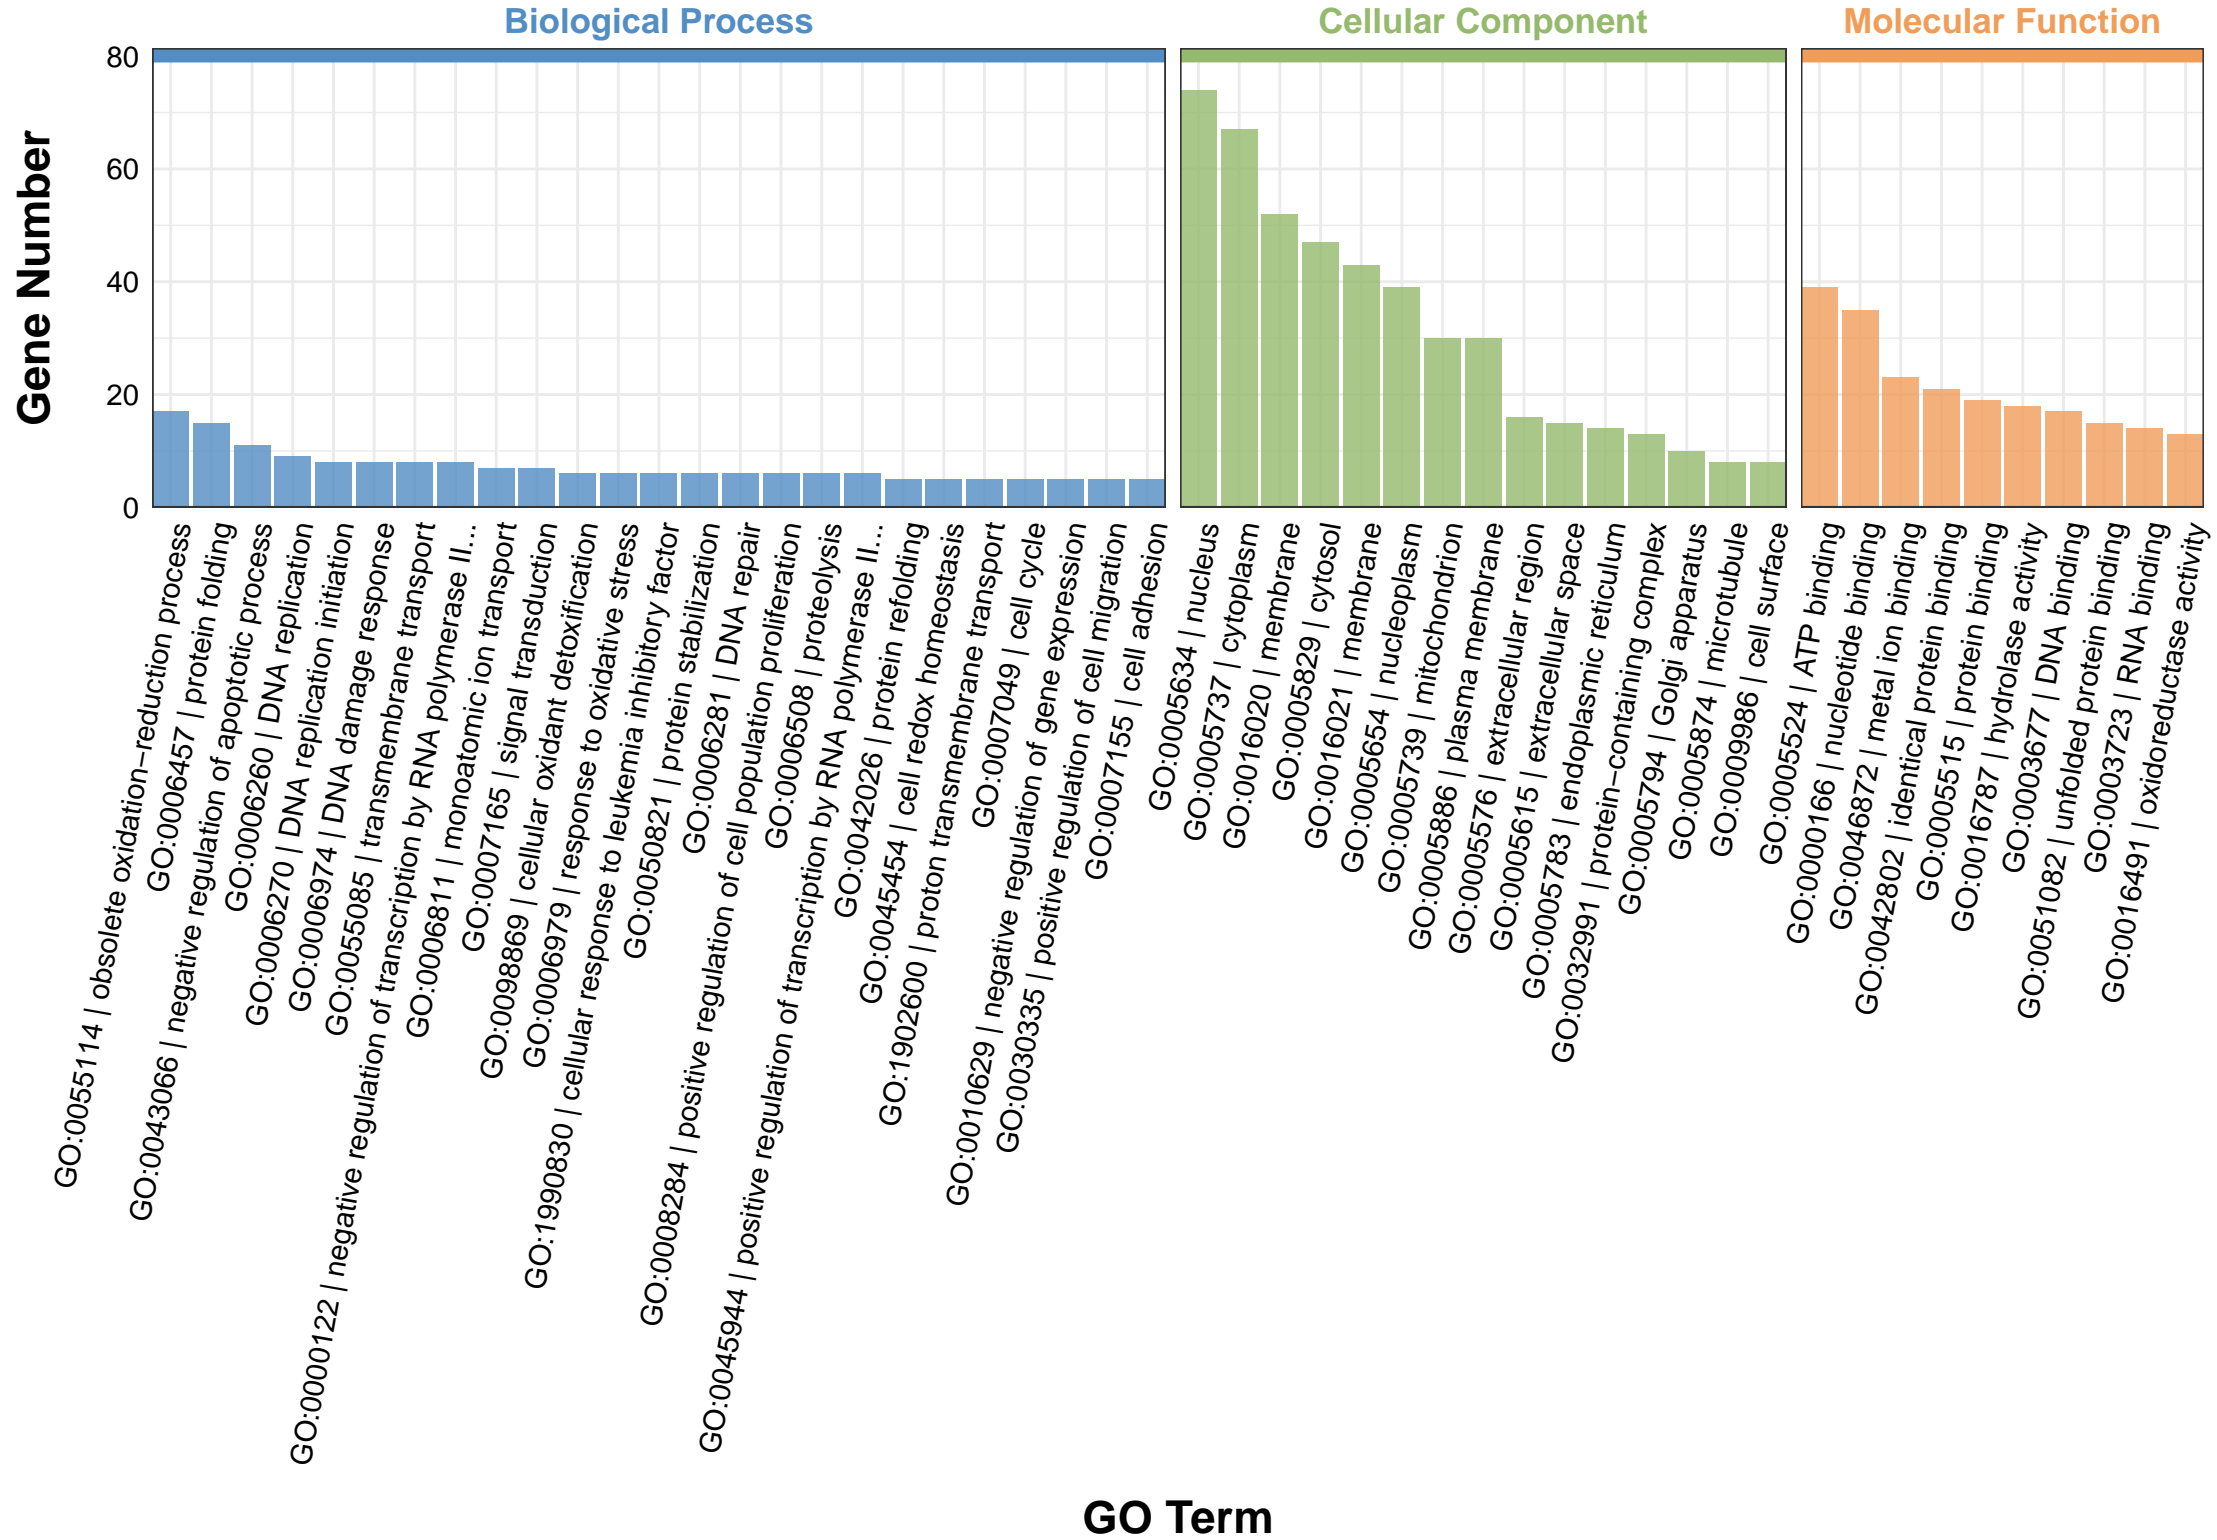

# GO Enrichment ScatterPlot

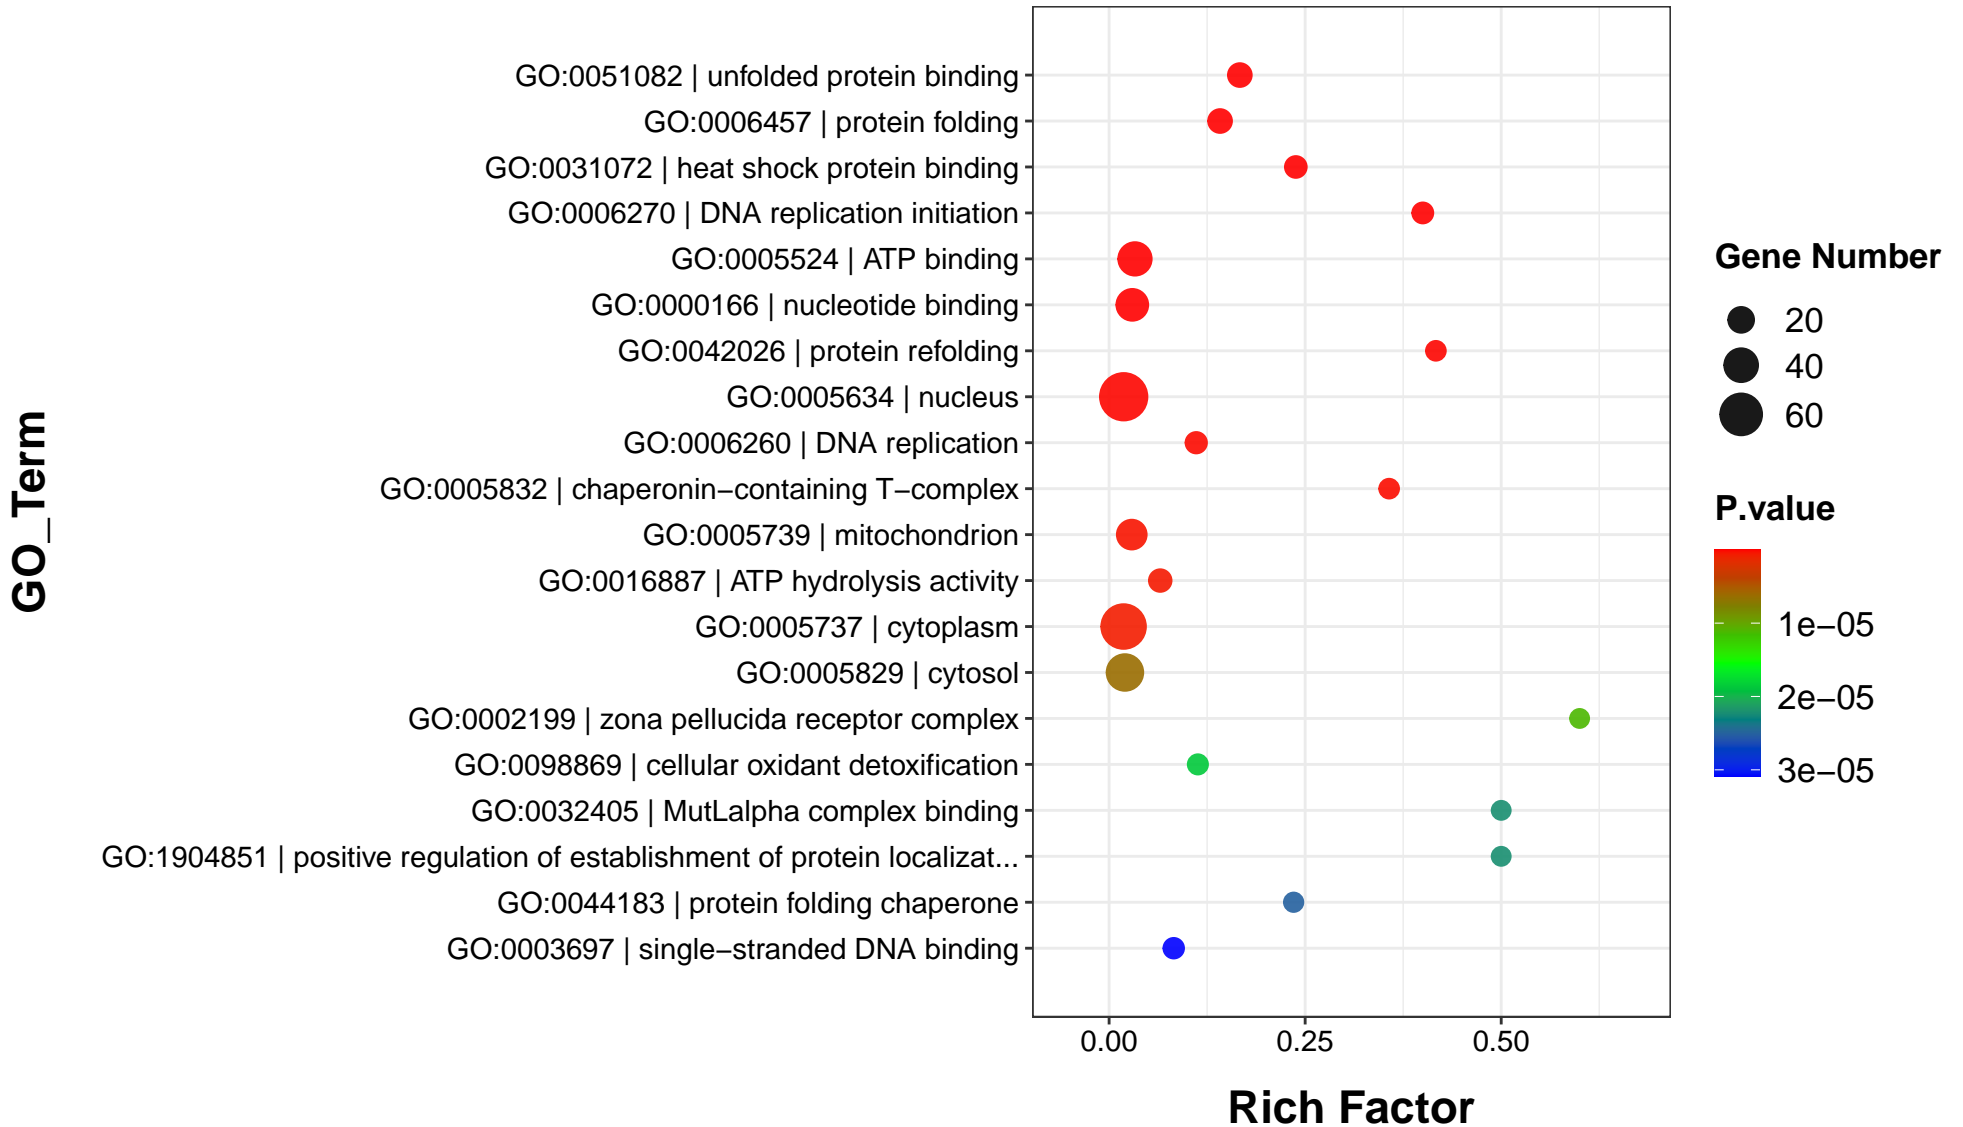

# KEGG Enrichment BarPlot

Pathway Name

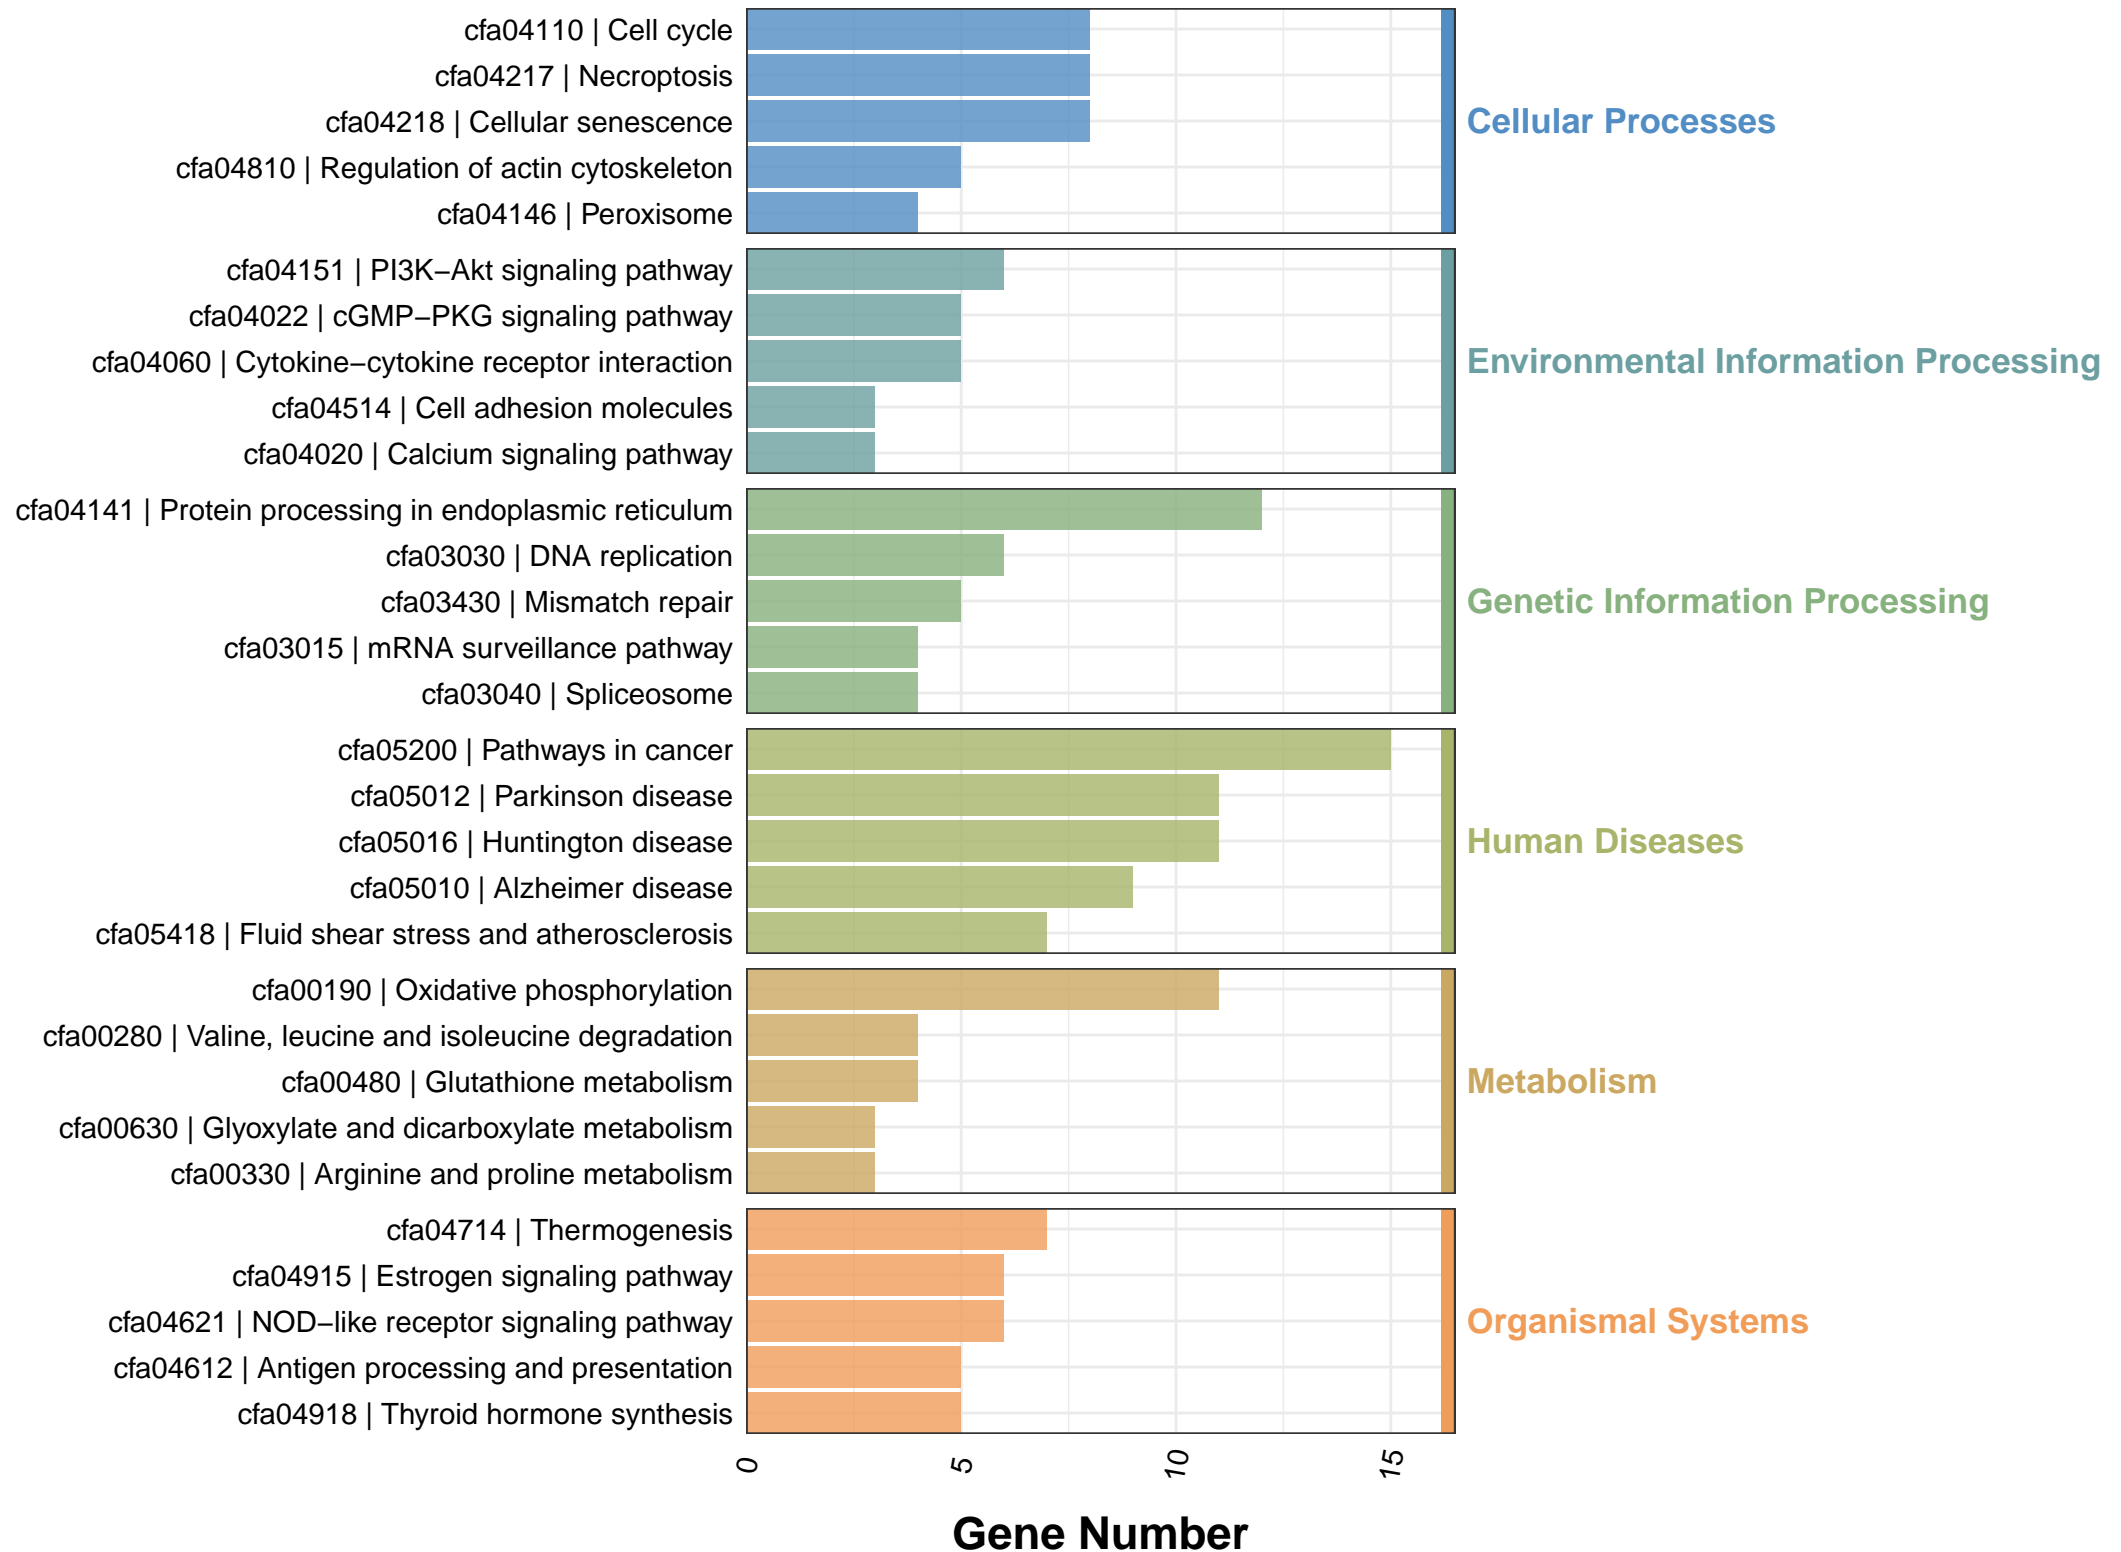

Gene Number

# KEGG Enrichment ScatterPlot

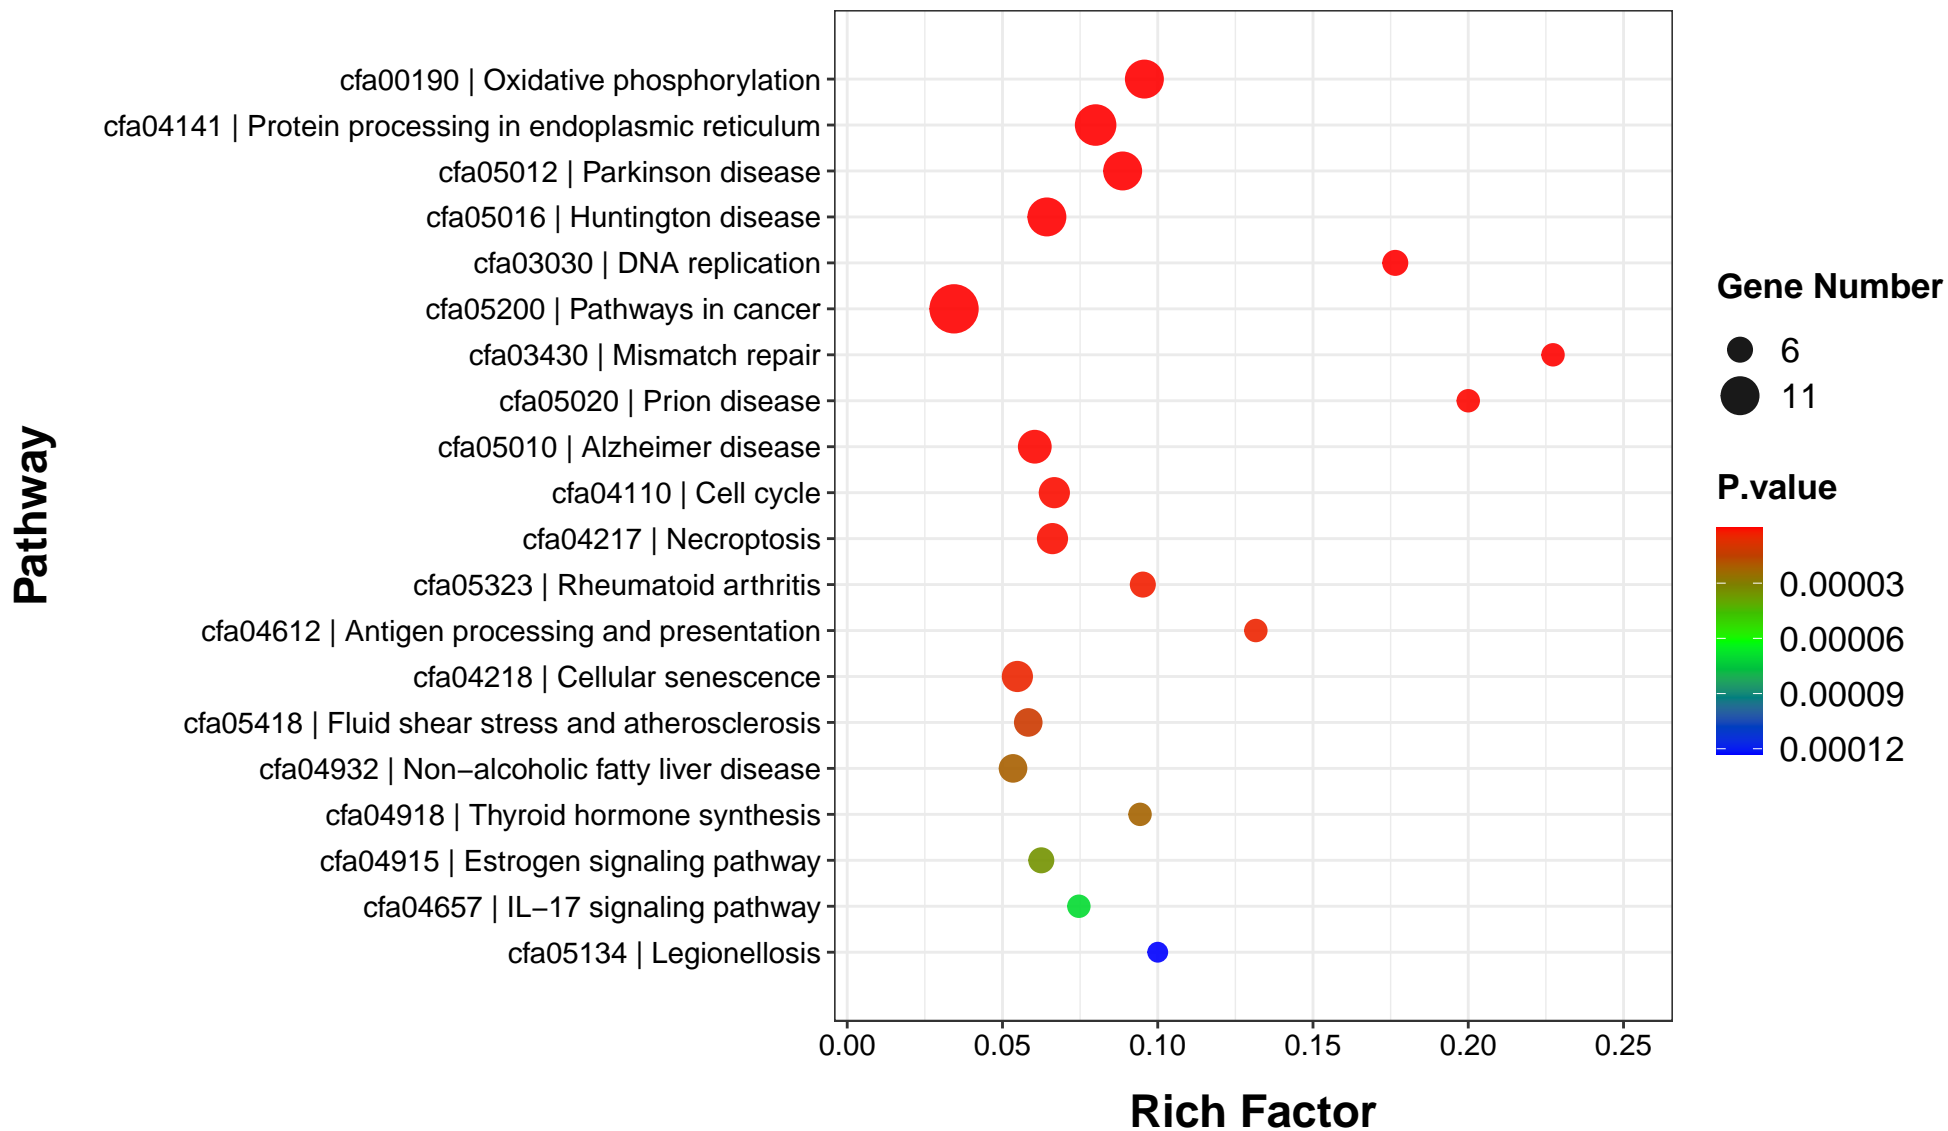

# GO Enrichment BarPlot

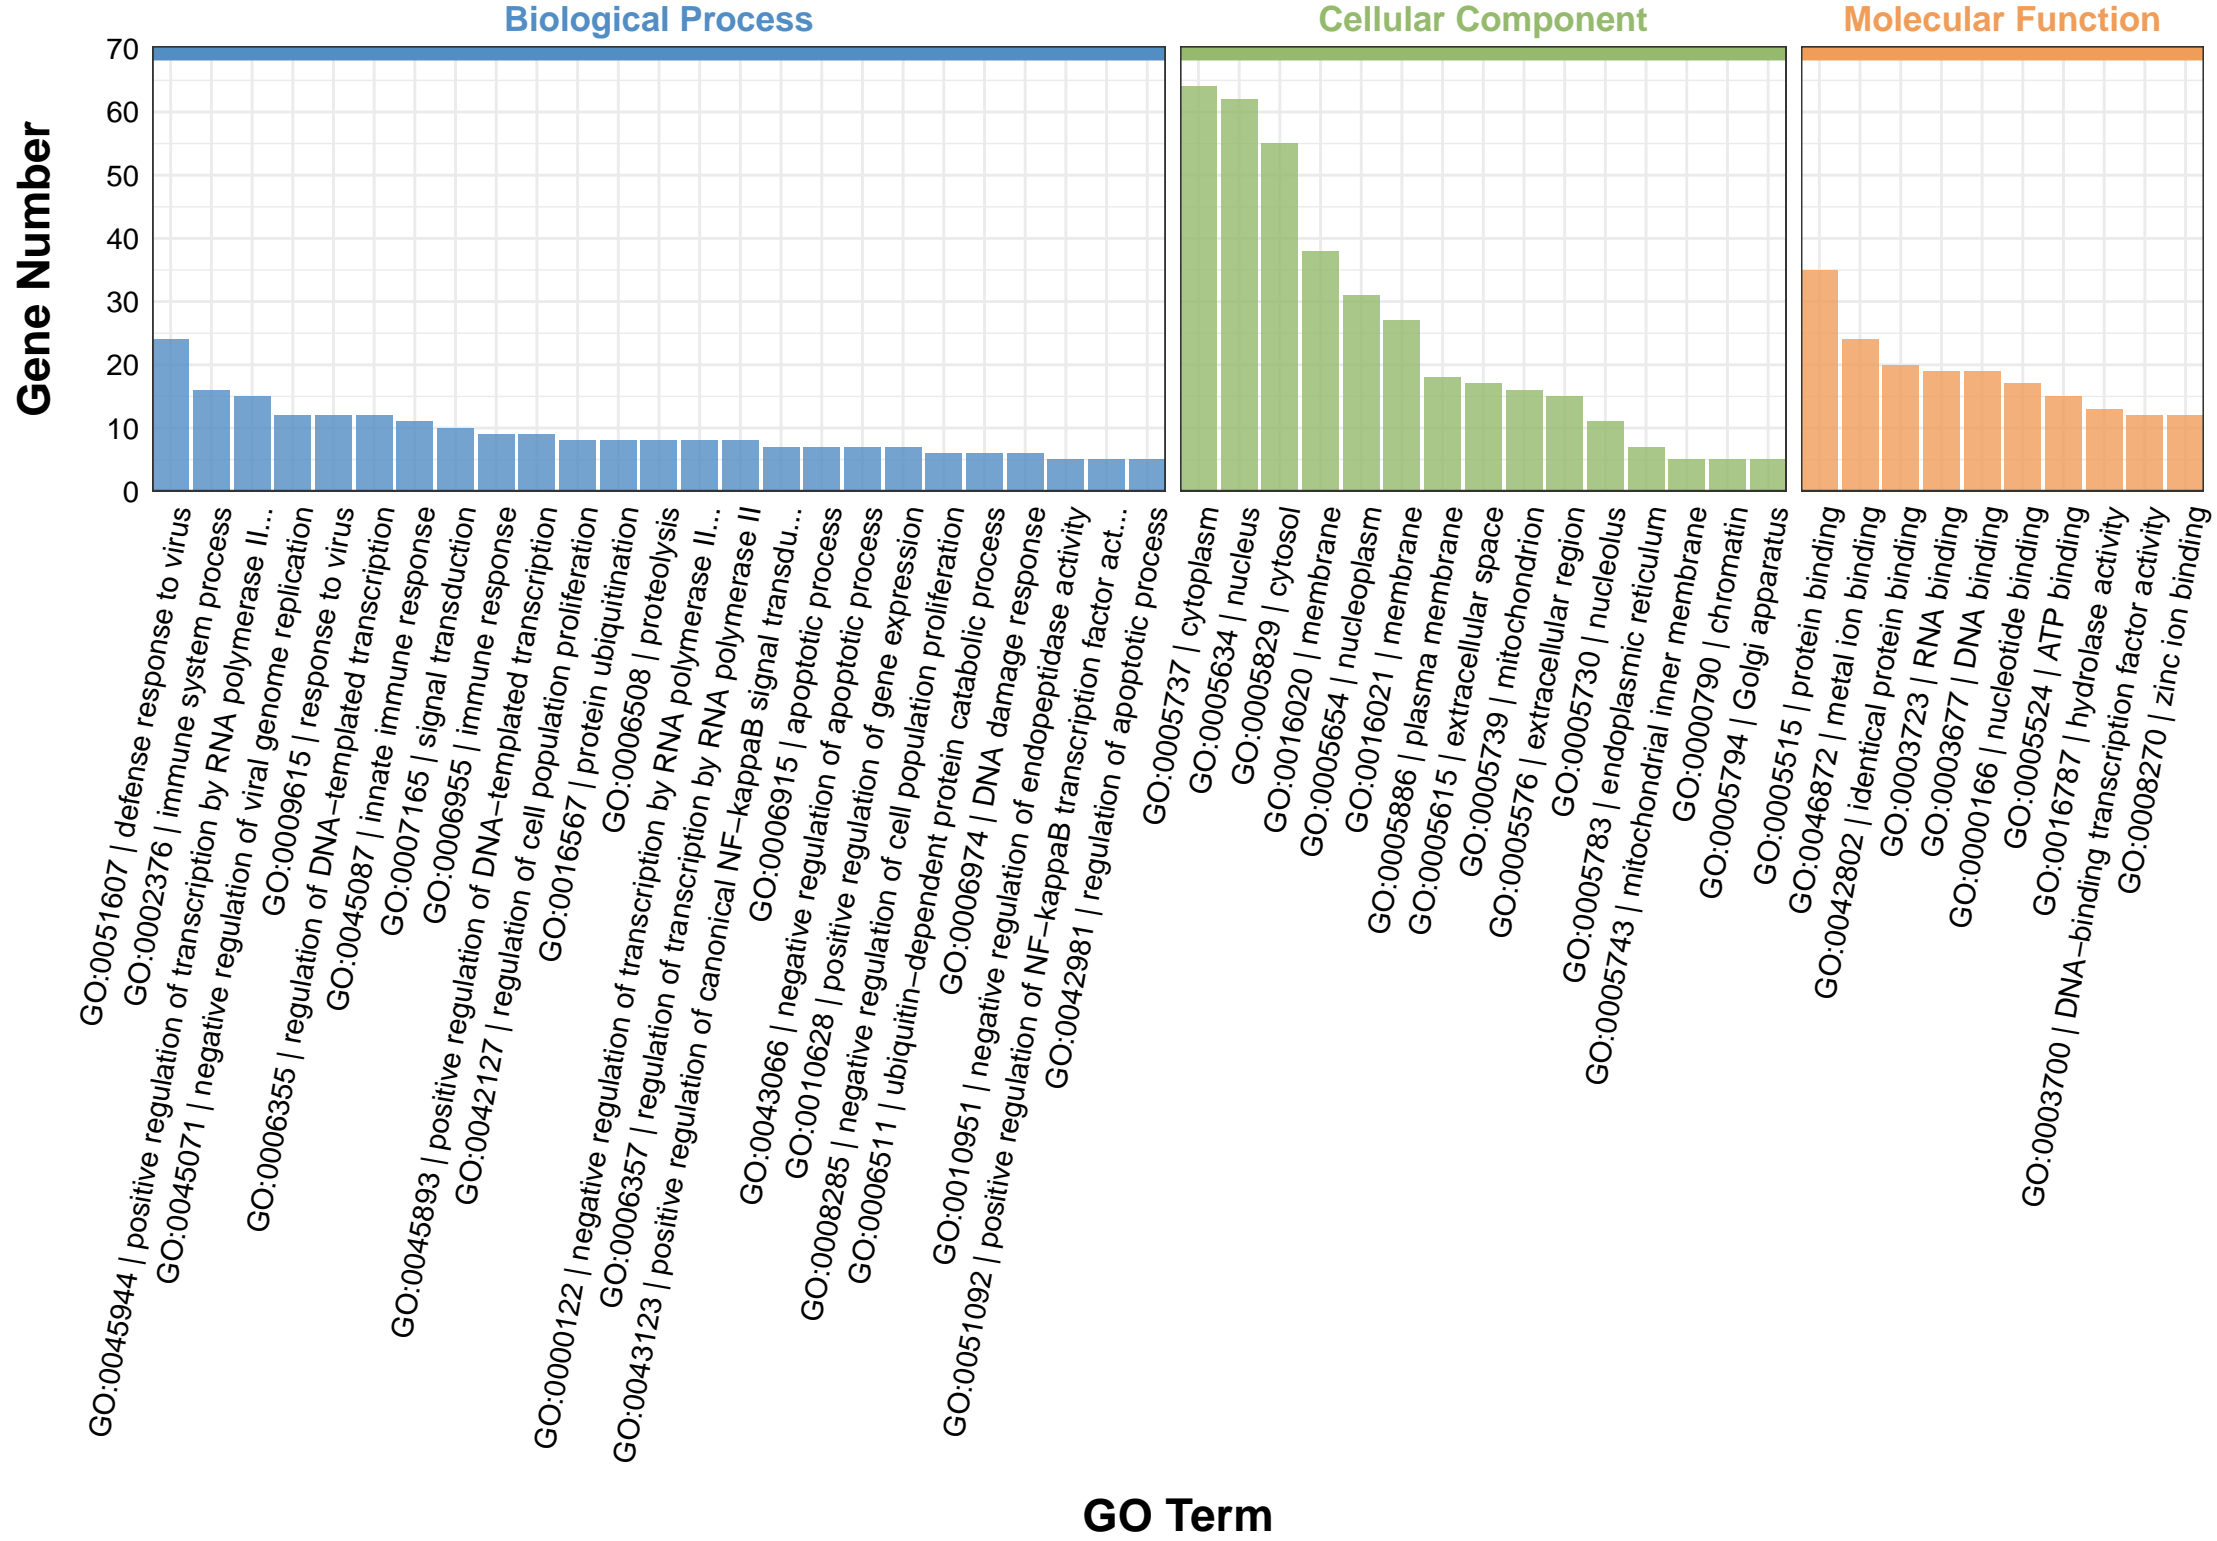

# GO Enrichment ScatterPlot

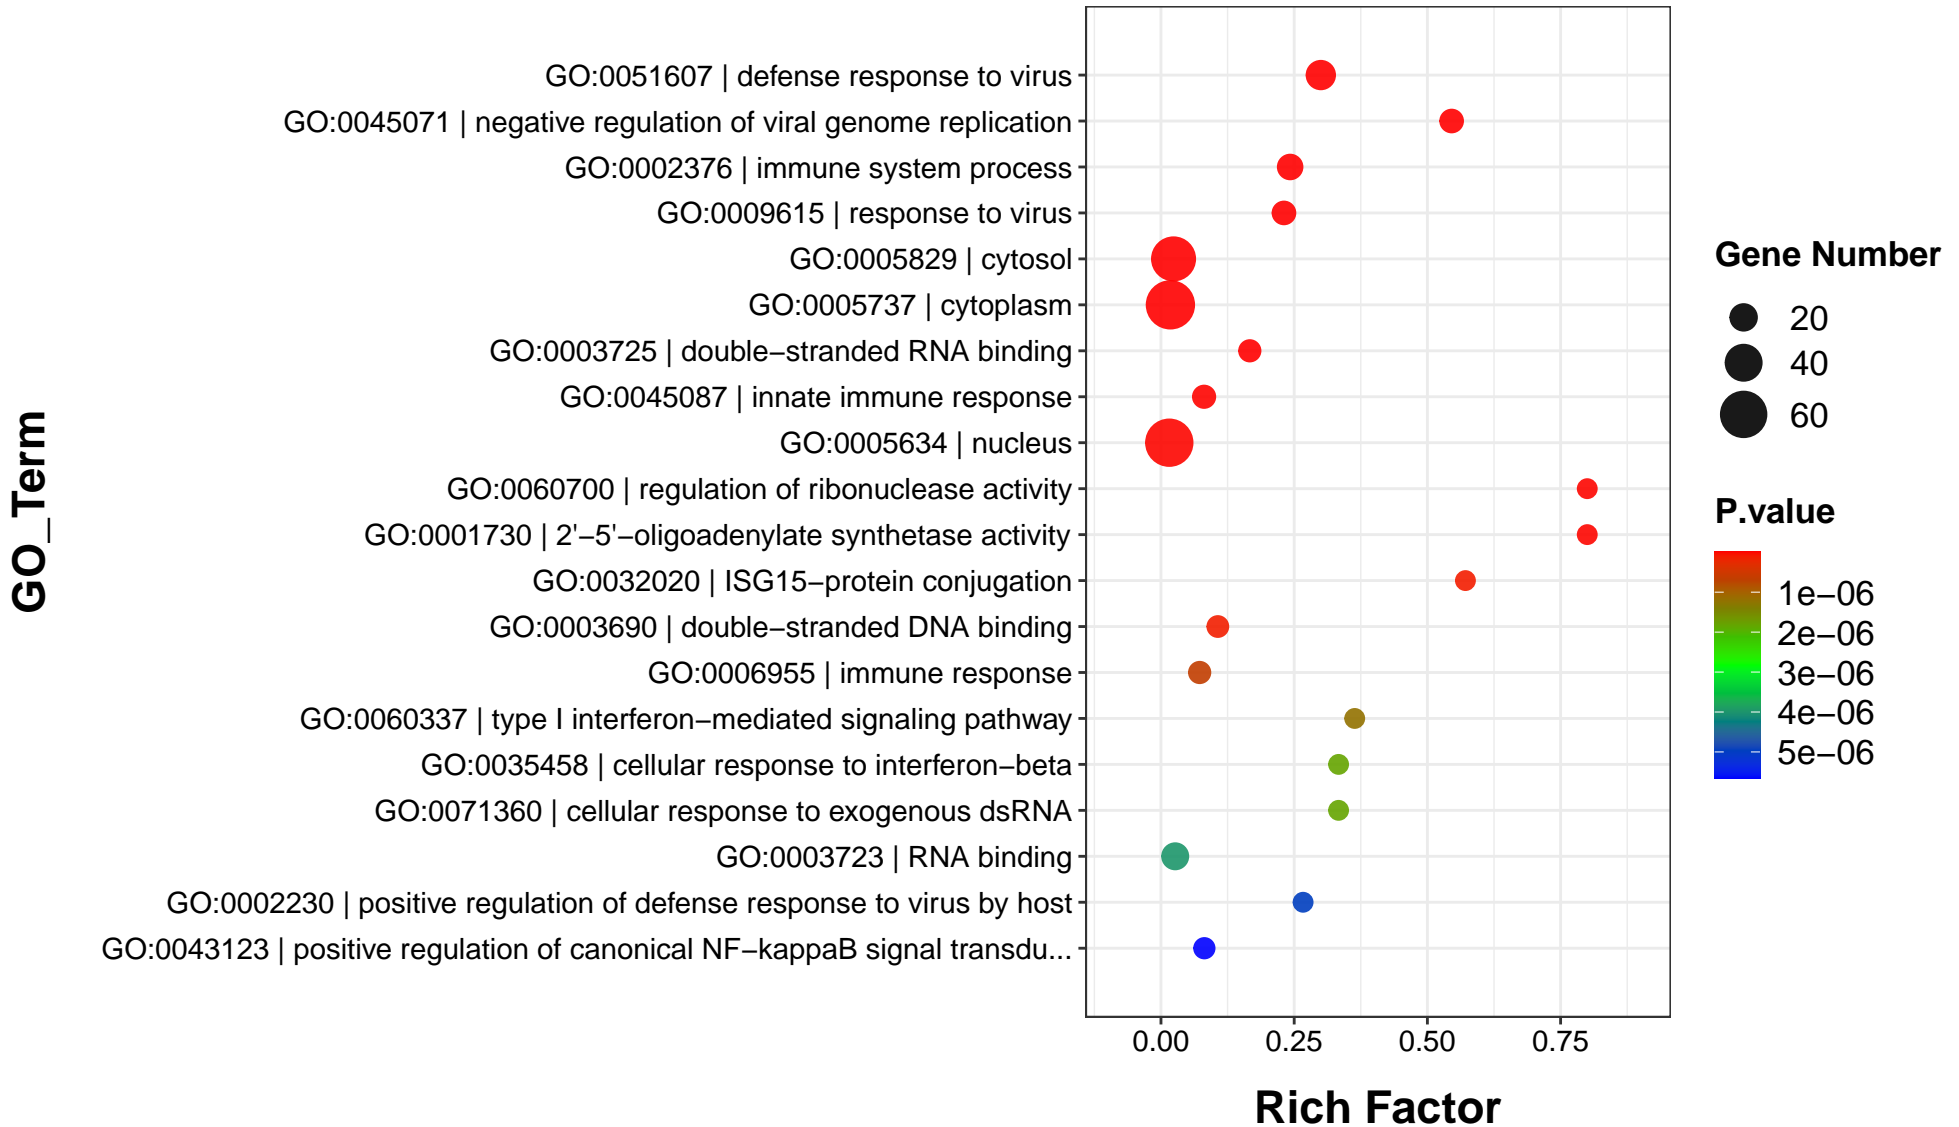

# KEGG Enrichment BarPlot

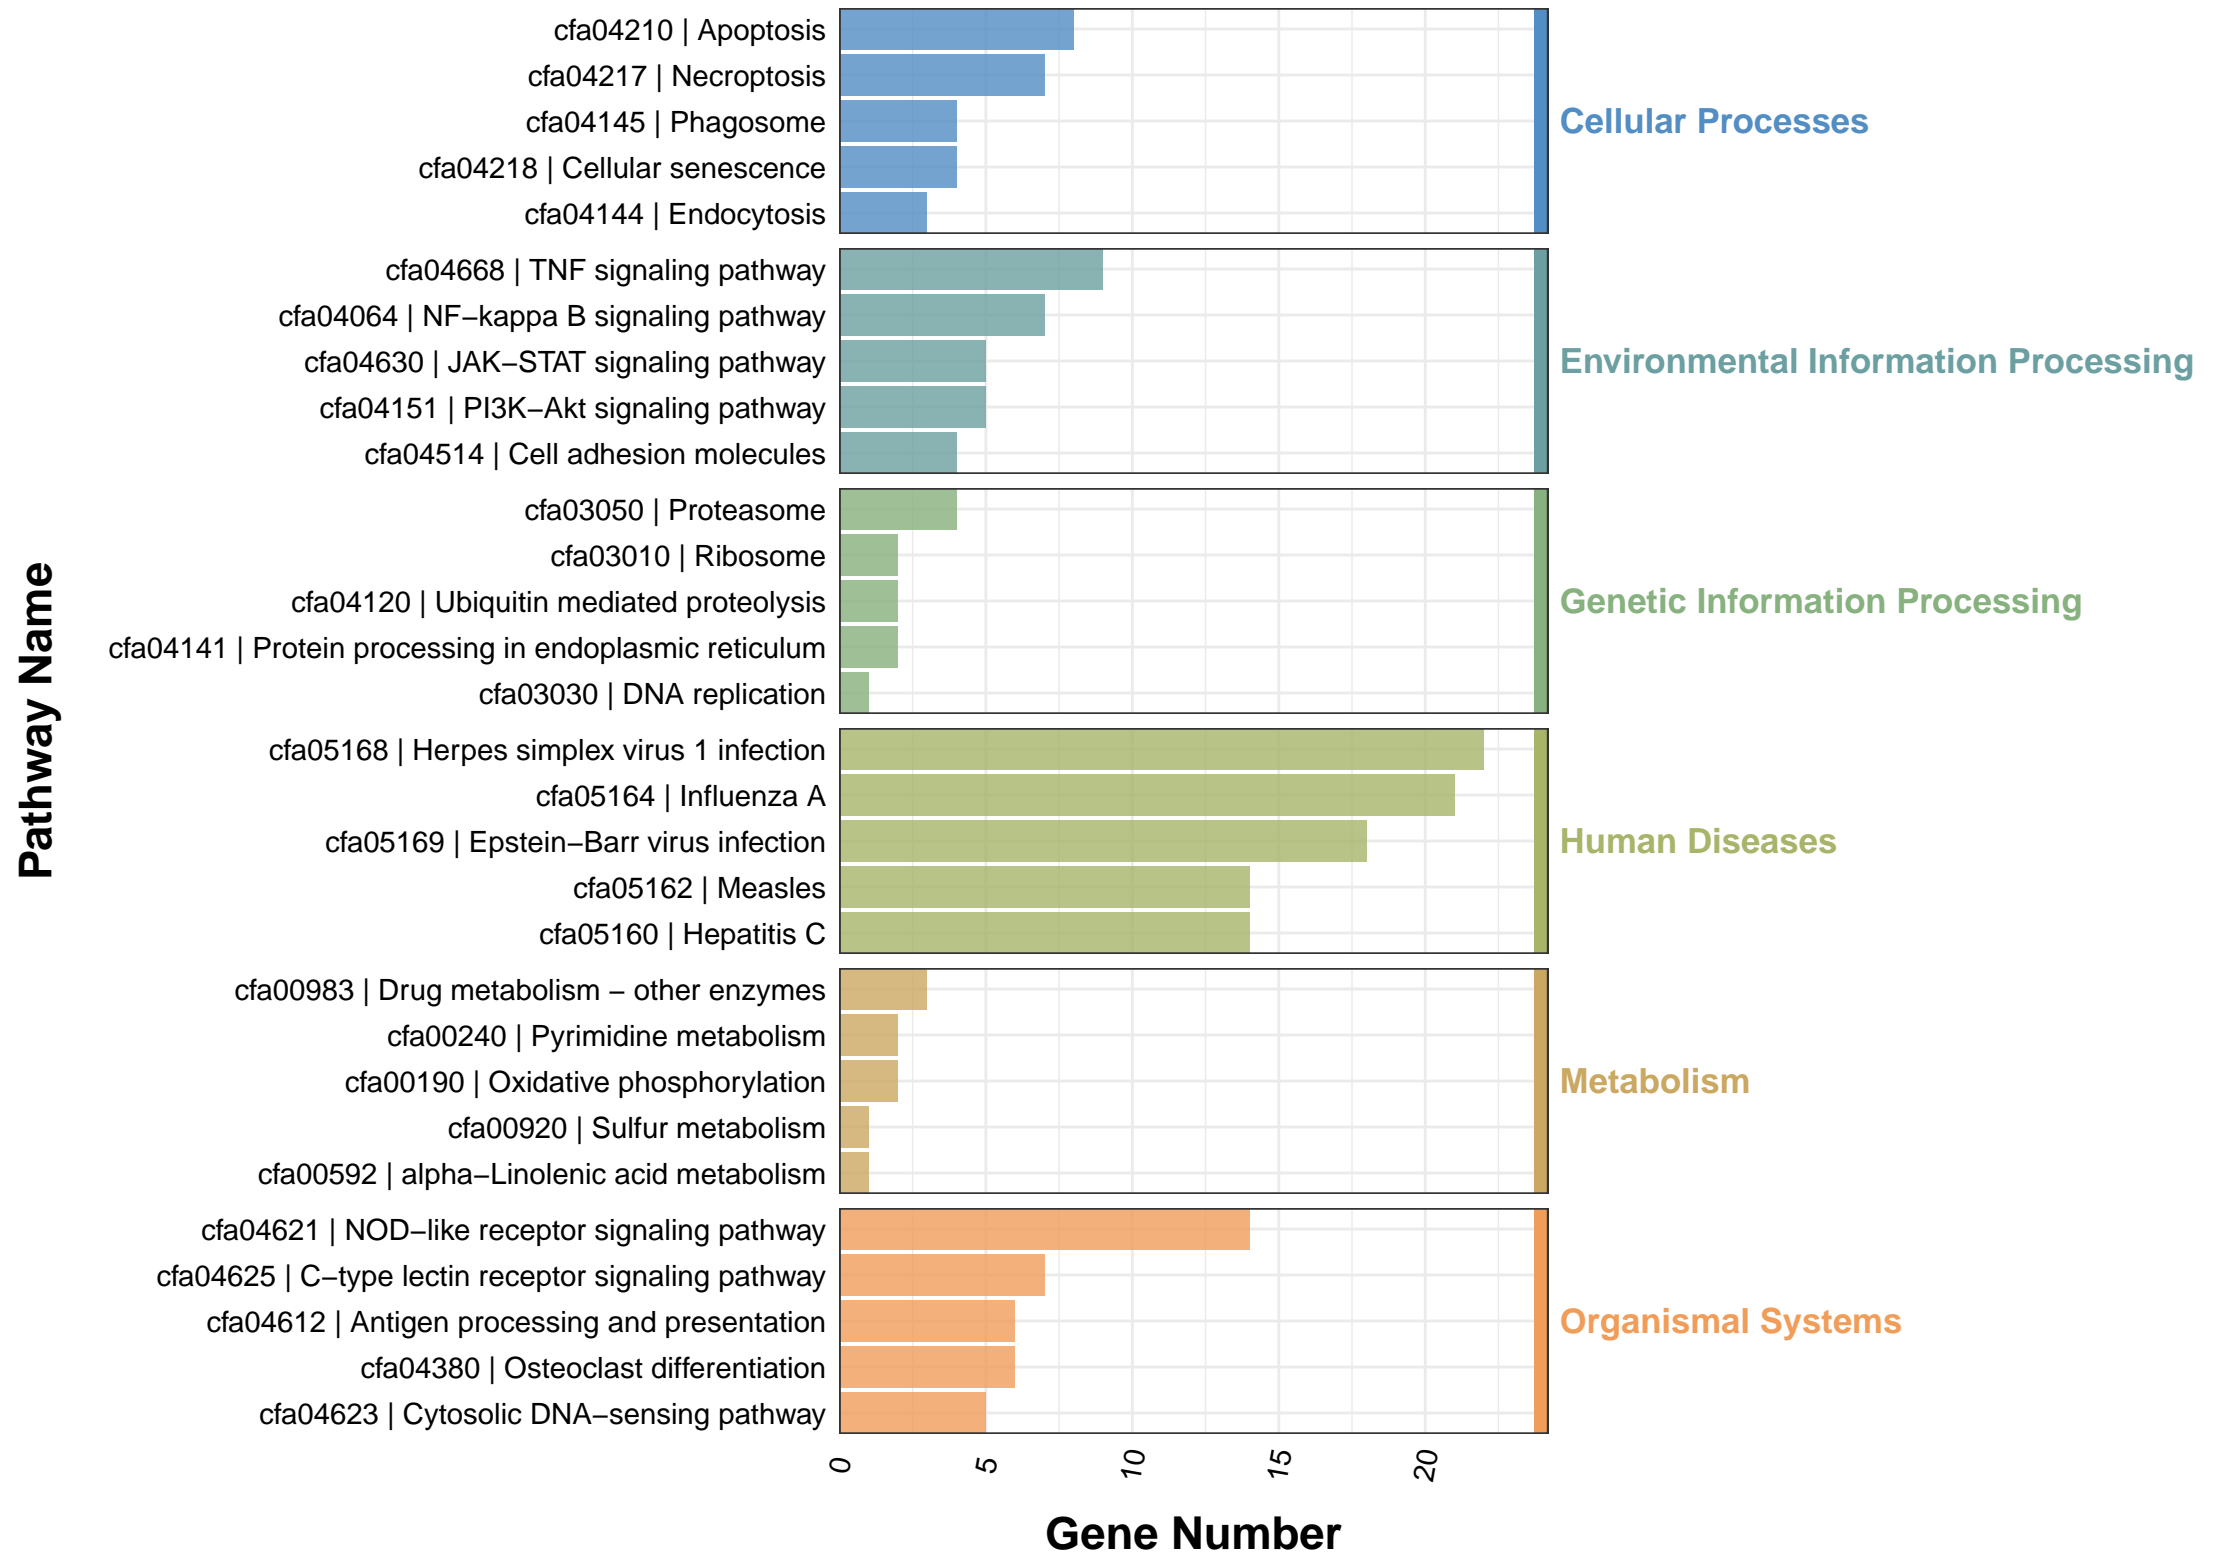

# KEGG Enrichment ScatterPlot

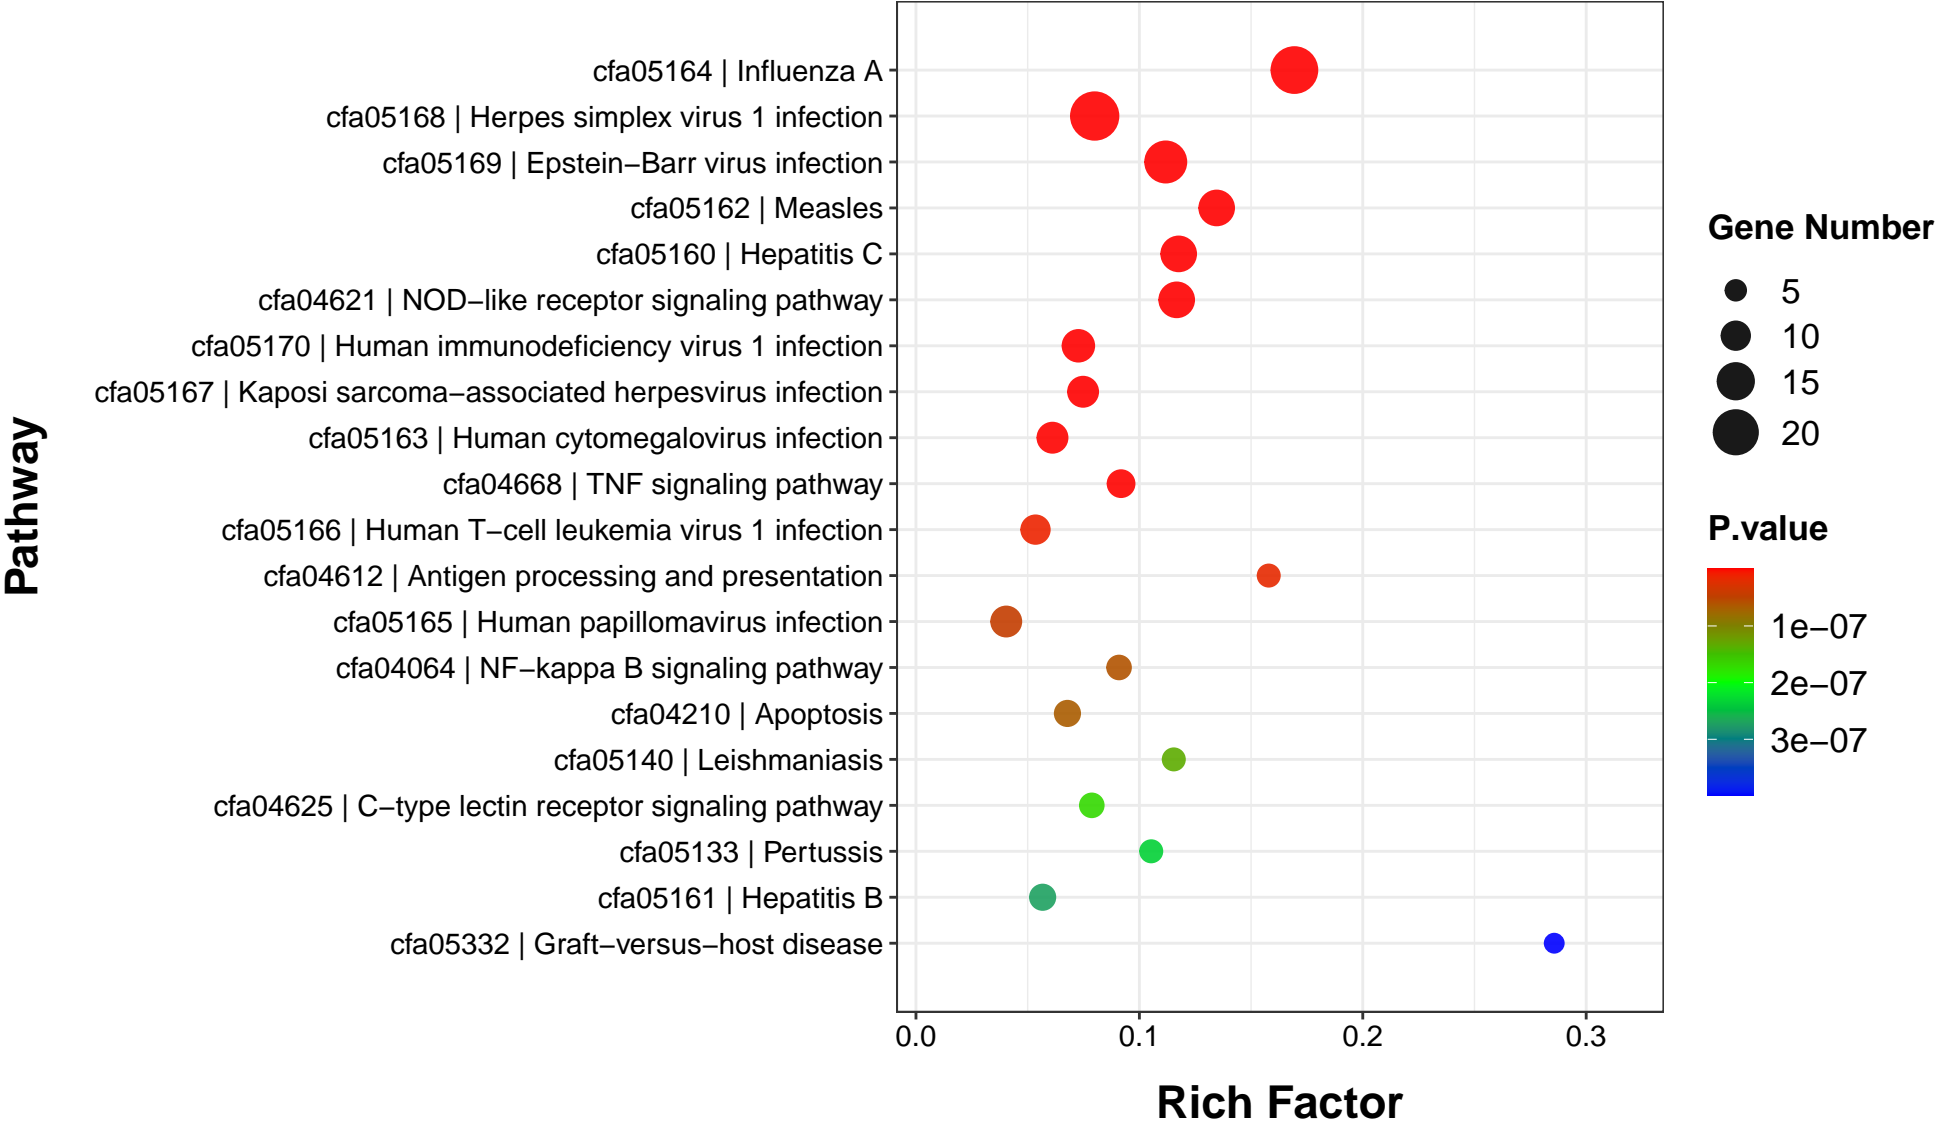



# GO Enrichment BarPlot

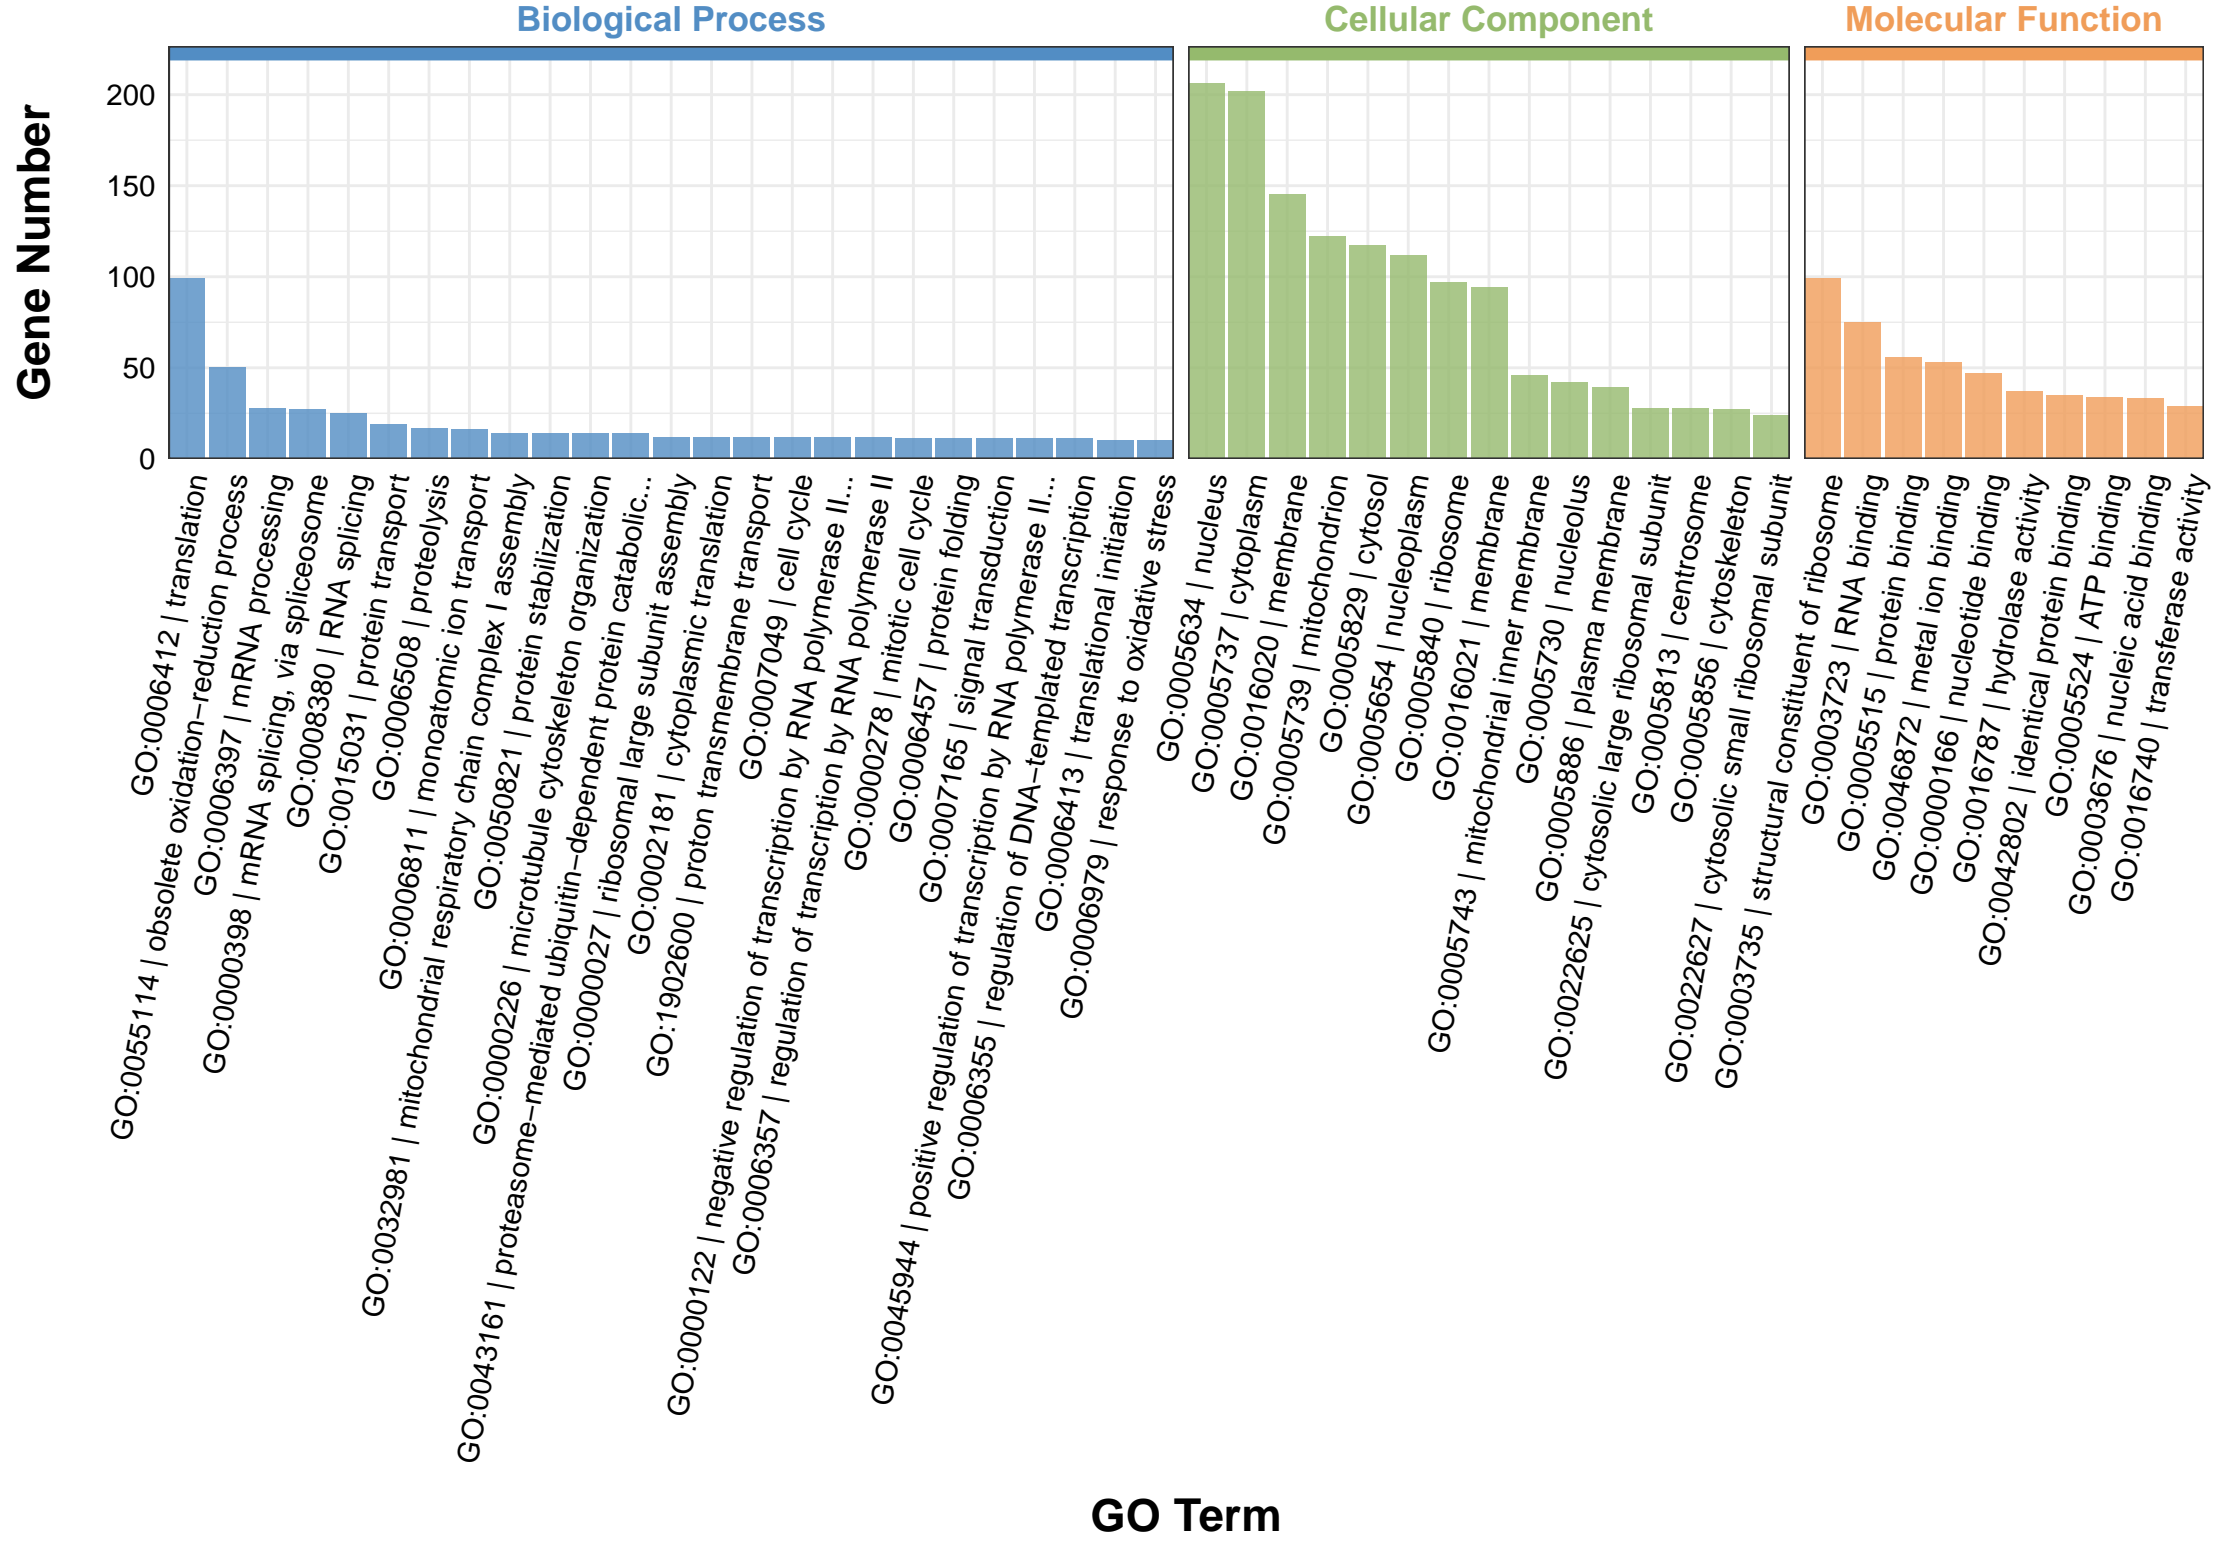

# GO Enrichment ScatterPlot

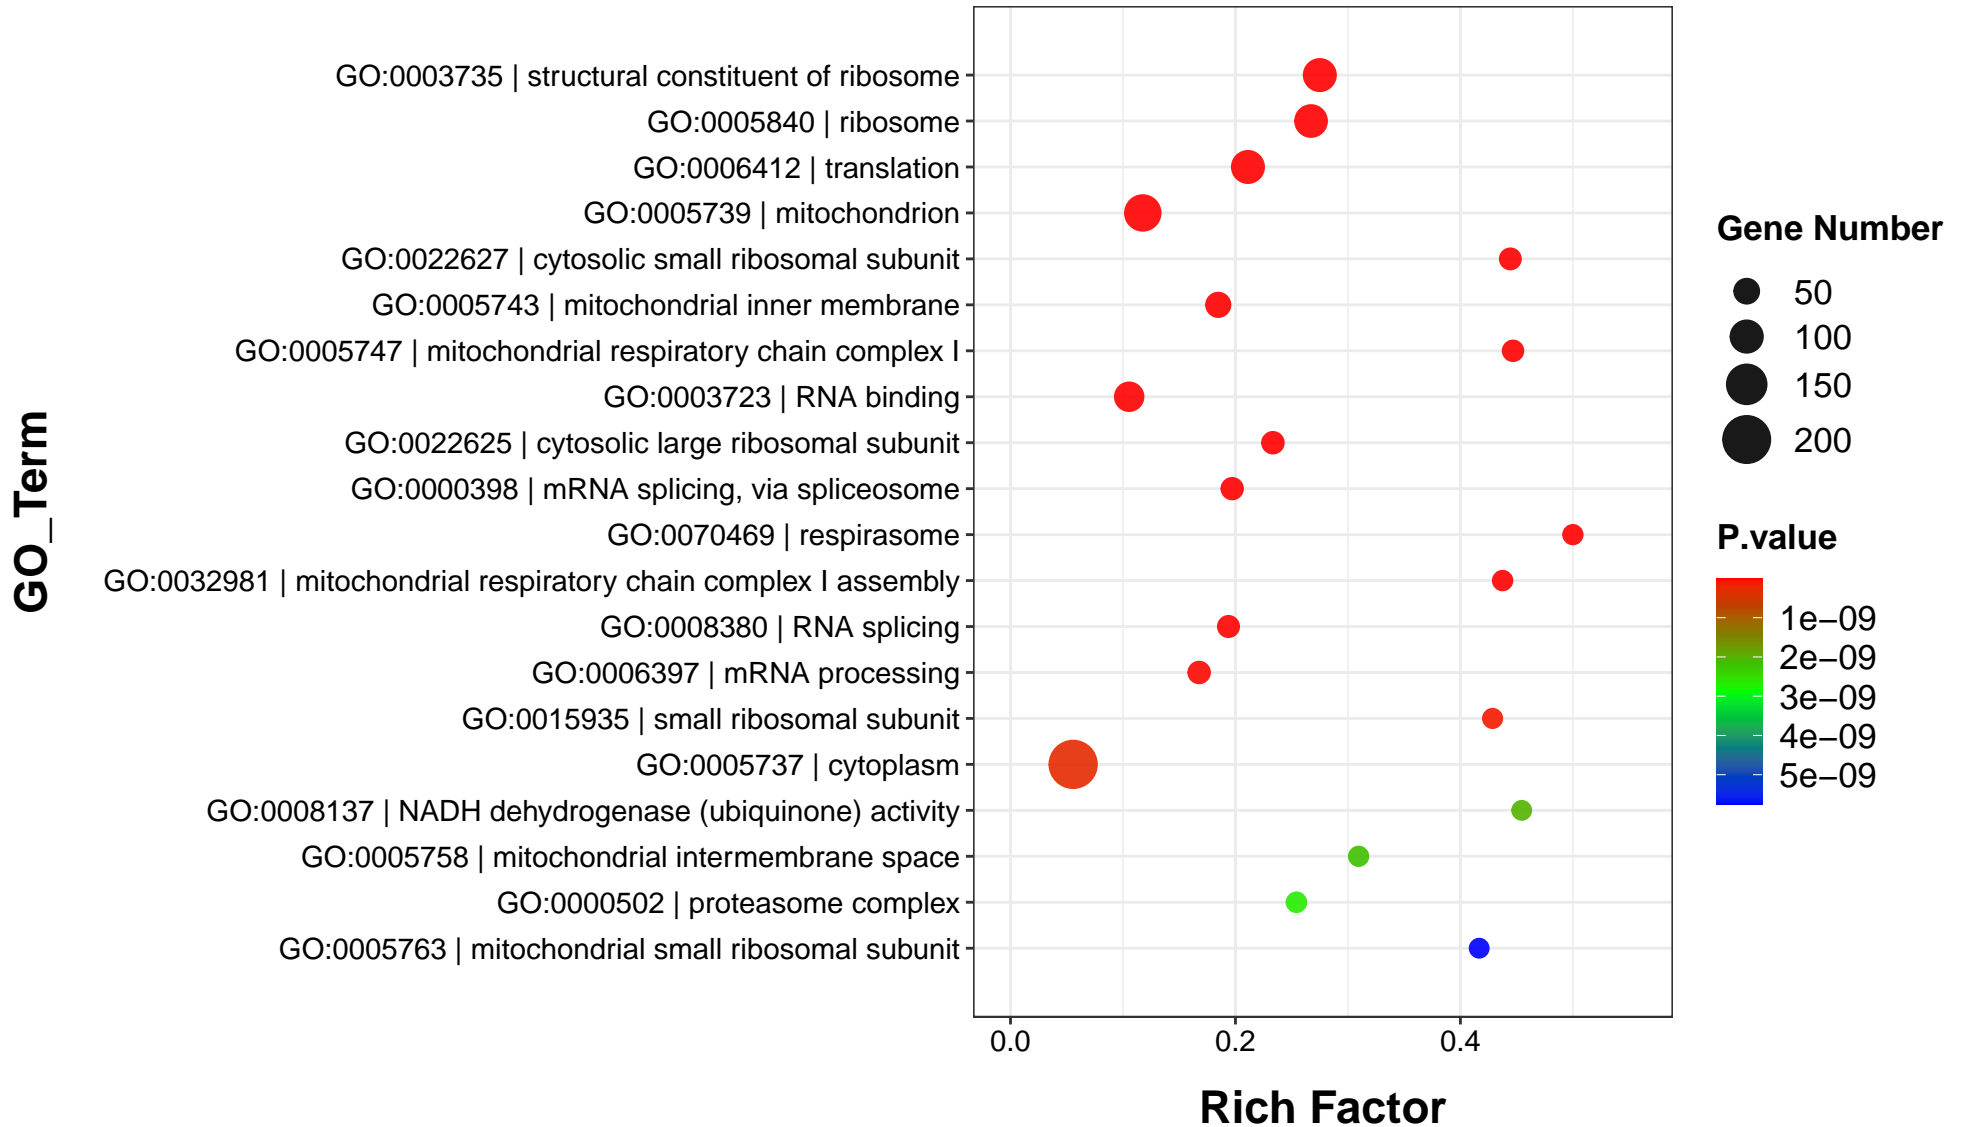

# KEGG Enrichment BarPlot

Pathway Name

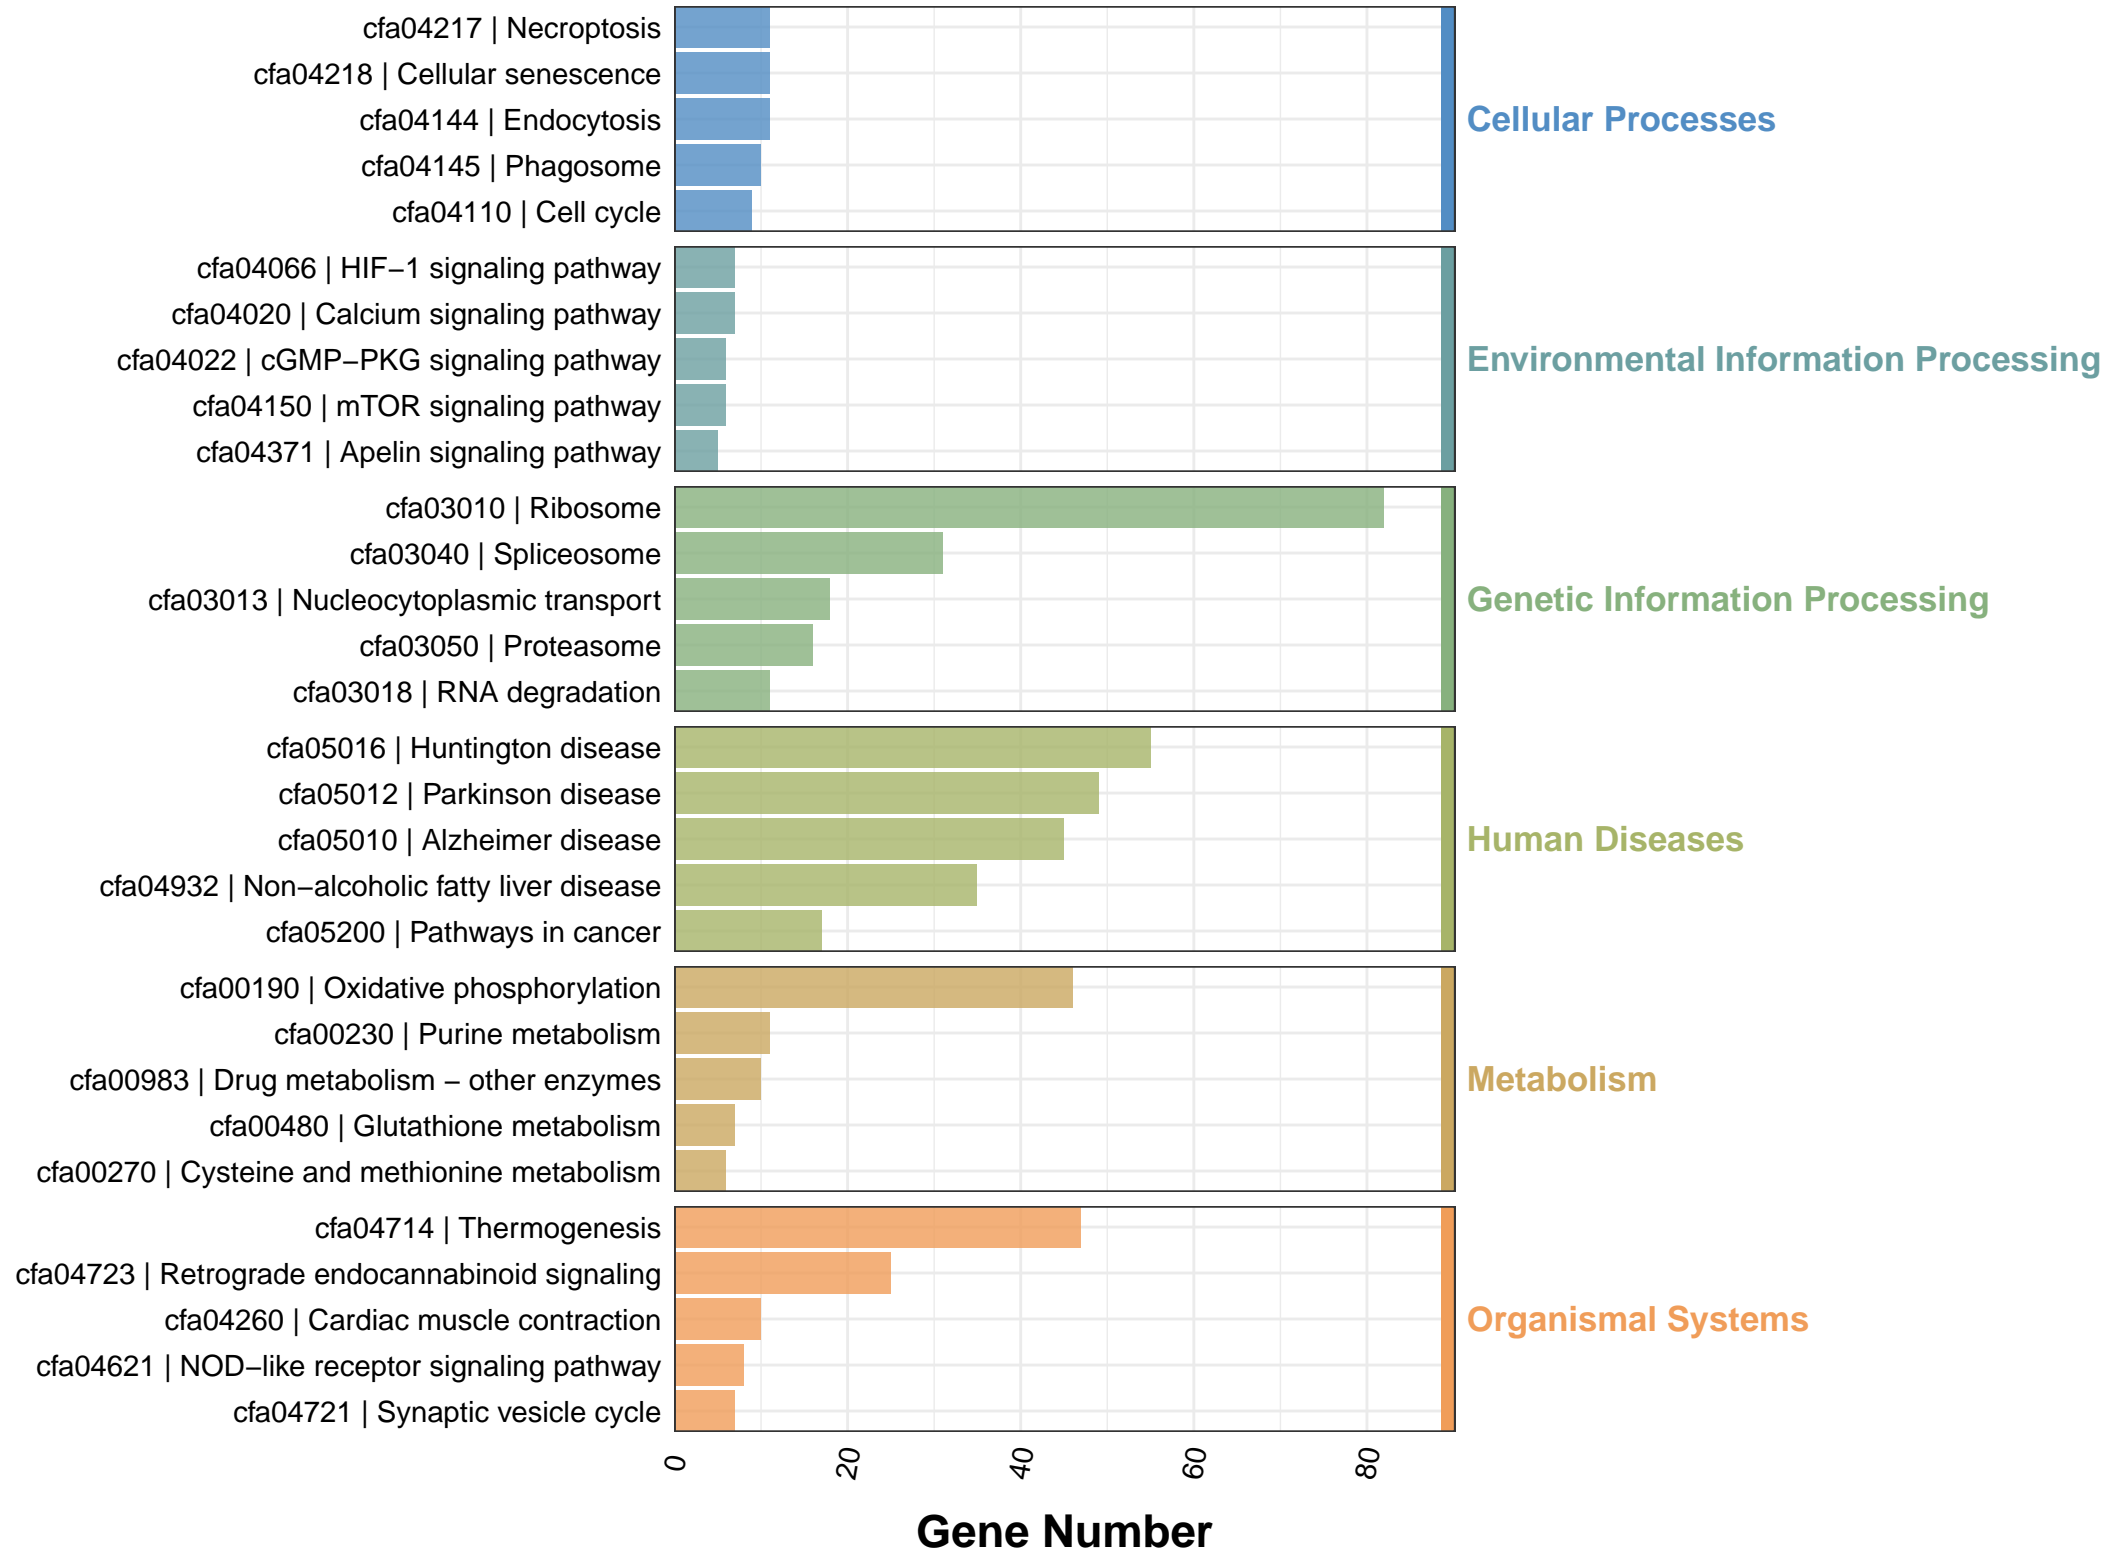

# KEGG Enrichment ScatterPlot

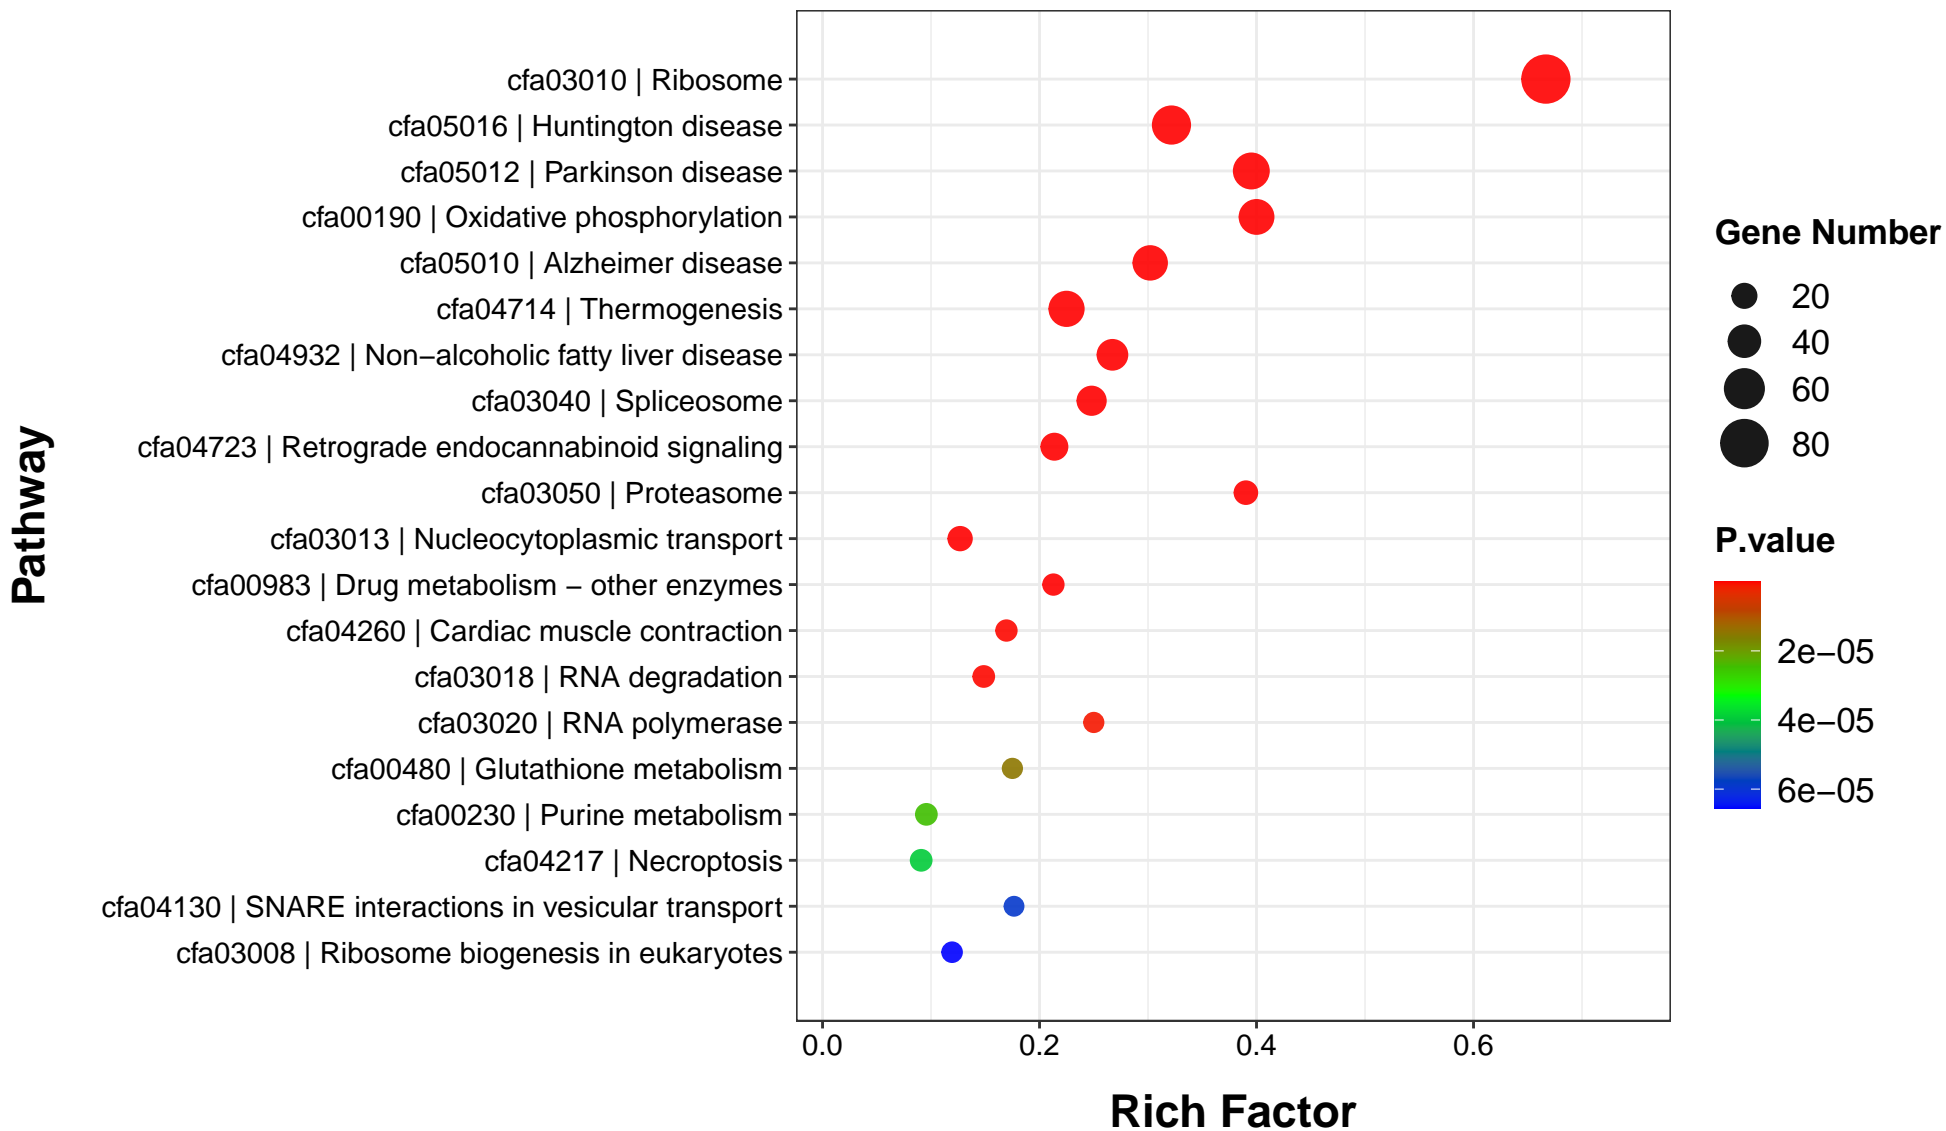

Supplement: 13287_2024_4067_MOESM16_ESM.pdf [file 13287_2024_4067_MOESM16_ESM.pdf]
